# Supplementary material for: Tissue-Specific Oncogenic Activity of KRASA146T
Source: Oxford University Press journal article supplement (doi:10.1158/2159-8290.cd-18-1220), 2019-04-05
Supplement: 21598290cd181220-sup-210474_2_supp_5431440_pp59my.docx [file 21598290cd181220-sup-210474_2_supp_5431440_pp59my.docx]

**Supplementary Table S1:** Data collection and refinement statistics

|  | | K-Ras4BA146T |
| --- | --- | --- |
| **Data collection** | |  |
| Source | APS 19-1D | |
| Wavelength (Å) | 1.00 | |
| Space group | | P3 |
| Unit cell | |  |
| *a*, *b*, *c* (Å) | | 78.02, 78.02, 55.86 |
| *α,β,γ* (°) | | 90.00, 90.00, 120.00 |
| Resolution (Å) | | 50.00 - 1.40 |
| Unique reflections | 74,694 | |
| *R*merge* | | 0.05 (0.67) |
| *I/δI* | | 25.09 (1.71) |
| Completeness (%) | | 99.80 (99.90) |
| Redundancy | | 5.60 (5.20) |
| Wilson B-factor (Å2) | | 17.3 |
| **Refinement** | |  |
| Resolution (Å) | | 28.91-1.40 (1.42-1.40) |
| Reflections used | | 74,670 |
| Relections for R-free | | 3,663 |
| *R*work / *R*free | | 11/14 |
| Non-Hydrogen Atoms | |  |
| Protein | | 2937 |
| GDP | | 56 |
| Water | | 348 |
| RMS deviations | |  |
| Bond lengths (Å) | | 0.014 |
| Bond angles (º) | | 1.381 |
| Average B-factor (Å2)  Protein  GDP  Water | | 22.3  18.0  41.8 |
| Ramachandran plot % | |  |
| Favored/allowed/disallowed | | 98.2/1.8/0 |

APS, Advanced Photon Source.

*Numbers in parentheses correspond to the last resolution shell.

­
