# Supplementary material for: Tissue-Specific Oncogenic Activity of KRASA146T
Source: Oxford University Press journal article supplement (doi:10.1158/2159-8290.cd-18-1220), 2019-04-05
Supplement: 21598290cd181220-sup-210474_2_supp_5431442_pp59my.xlsx [file 21598290cd181220-sup-210474_2_supp_5431442_pp59my.xlsx]

## Sheet: Parameters
Table S11: GSEA analysis of colons expressing WT or mutant K-Ras.
Parameter
scoring_scheme	classic
norm	meandiv
makes_sets	true
set_max	500
rnd_seed	timestamp
set_min	10
nperm	1000

## Sheet: A146T vs WT Protein
Timestamp	1502210364369
NAME	SIZE	ES	NES	NOM p-val	FDR q-val	FWER p-val	RANK AT MAX	LEADING EDGE
KEGG_COMPLEMENT_AND_COAGULATION_CASCADES	43	-0.727007	-5.49572	0	0	0	980	tags=84%, list=11%, signal=94%
KEGG_HYPERTROPHIC_CARDIOMYOPATHY_HCM	43	-0.404932	-3.10718	0	0	0	3136	tags=77%, list=36%, signal=120%
KEGG_CELL_ADHESION_MOLECULES_CAMS	56	-0.352361	-3.08988	0	0	0	1444	tags=52%, list=17%, signal=62%
KEGG_ECM_RECEPTOR_INTERACTION	56	-0.326294	-2.85916	0	0	0	2281	tags=59%, list=27%, signal=80%
KEGG_FOCAL_ADHESION	132	-0.211524	-2.83179	0	0	0	1728	tags=41%, list=20%, signal=50%
KEGG_HEMATOPOIETIC_CELL_LINEAGE	23	-0.494979	-2.79705	0	0.000234848	0.001	2486	tags=78%, list=29%, signal=110%
KEGG_N_GLYCAN_BIOSYNTHESIS	33	-0.403988	-2.79155	0	0.000201299	0.001	3837	tags=85%, list=45%, signal=153%
KEGG_LEUKOCYTE_TRANSENDOTHELIAL_MIGRATION	77	-0.267295	-2.76489	0	0.000176136	0.001	1967	tags=49%, list=23%, signal=63%
KEGG_DILATED_CARDIOMYOPATHY	43	-0.349188	-2.72421	0	0.000320587	0.002	3613	tags=77%, list=42%, signal=132%
KEGG_LYSOSOME	95	-0.228287	-2.61201	0	0.000437926	0.003	5211	tags=83%, list=61%, signal=209%
KEGG_SYSTEMIC_LUPUS_ERYTHEMATOSUS	31	-0.382158	-2.47446	0.00195695	0.00196335	0.014	1165	tags=52%, list=14%, signal=59%
KEGG_ARRHYTHMOGENIC_RIGHT_VENTRICULAR_CARDIOMYOPATHY_ARVC	43	-0.31705	-2.45742	0	0.00193394	0.015	1488	tags=49%, list=17%, signal=59%
KEGG_ANTIGEN_PROCESSING_AND_PRESENTATION	31	-0.357128	-2.3447	0	0.00528294	0.045	3044	tags=71%, list=35%, signal=109%
KEGG_REGULATION_OF_ACTIN_CYTOSKELETON	134	-0.176582	-2.33561	0.00193798	0.00511913	0.047	4218	tags=66%, list=49%, signal=128%
KEGG_VASCULAR_SMOOTH_MUSCLE_CONTRACTION	55	-0.258152	-2.32169	0	0.00532431	0.052	4206	tags=75%, list=49%, signal=145%
KEGG_VALINE_LEUCINE_AND_ISOLEUCINE_DEGRADATION	43	-0.298002	-2.31277	0	0.00508062	0.053	4851	tags=86%, list=56%, signal=196%
KEGG_ARGININE_AND_PROLINE_METABOLISM	44	-0.297686	-2.31142	0	0.00505555	0.056	1754	tags=50%, list=20%, signal=62%
KEGG_PRION_DISEASES	26	-0.373661	-2.28636	0.00194932	0.00501029	0.059	1428	tags=54%, list=17%, signal=64%
KEGG_OOCYTE_MEIOSIS	60	-0.250429	-2.24672	0	0.00631137	0.077	4599	tags=78%, list=53%, signal=167%
KEGG_VIRAL_MYOCARDITIS	31	-0.344464	-2.20872	0.00424628	0.00801978	0.096	1488	tags=52%, list=17%, signal=62%
KEGG_CITRATE_CYCLE_TCA_CYCLE	29	-0.342357	-2.19944	0.00192308	0.0080667	0.102	4777	tags=90%, list=56%, signal=201%
KEGG_PPAR_SIGNALING_PATHWAY	43	-0.282459	-2.16635	0.004	0.0103147	0.134	1184	tags=42%, list=14%, signal=48%
KEGG_PROTEIN_EXPORT	18	-0.421761	-2.13615	0.004	0.0118225	0.159	1637	tags=61%, list=19%, signal=75%
KEGG_VIBRIO_CHOLERAE_INFECTION	35	-0.300675	-2.11802	0	0.0129507	0.179	4060	tags=77%, list=47%, signal=146%
KEGG_PARKINSONS_DISEASE	99	-0.185234	-2.11712	0	0.012554	0.181	4594	tags=72%, list=53%, signal=152%
KEGG_PROPANOATE_METABOLISM	28	-0.329978	-2.08459	0.00199601	0.0148123	0.223	4851	tags=89%, list=56%, signal=204%
KEGG_ALZHEIMERS_DISEASE	120	-0.162382	-2.07147	0.00211416	0.0158162	0.244	4644	tags=70%, list=54%, signal=150%
KEGG_OXIDATIVE_PHOSPHORYLATION	99	-0.178223	-2.03889	0.00195312	0.0196468	0.3	4393	tags=69%, list=51%, signal=139%
KEGG_GLYCOLYSIS_GLUCONEOGENESIS	48	-0.246317	-2.01309	0.00205761	0.0218743	0.337	4882	tags=81%, list=57%, signal=187%
KEGG_PROTEASOME	40	-0.267407	-2.01201	0.00801603	0.0212985	0.34	3732	tags=70%, list=43%, signal=123%
KEGG_PEROXISOME	58	-0.212996	-1.93768	0.00635593	0.0311033	0.475	4854	tags=78%, list=56%, signal=177%
KEGG_PYRUVATE_METABOLISM	35	-0.274339	-1.91811	0.00813008	0.0330776	0.505	4777	tags=83%, list=56%, signal=186%
KEGG_AMINO_SUGAR_AND_NUCLEOTIDE_SUGAR_METABOLISM	41	-0.248388	-1.9074	0.00202429	0.0342287	0.527	4797	tags=80%, list=56%, signal=181%
KEGG_PURINE_METABOLISM	116	-0.151604	-1.88131	0.00775194	0.037437	0.577	6351	tags=89%, list=74%, signal=335%
KEGG_SNARE_INTERACTIONS_IN_VESICULAR_TRANSPORT	32	-0.279558	-1.84585	0.0139442	0.0449616	0.659	2712	tags=59%, list=32%, signal=86%
KEGG_STARCH_AND_SUCROSE_METABOLISM	27	-0.295571	-1.83252	0.0197239	0.0470214	0.683	4793	tags=85%, list=56%, signal=192%
KEGG_GLYCOSAMINOGLYCAN_DEGRADATION	12	-0.442944	-1.82799	0.0117188	0.0466656	0.687	4797	tags=100%, list=56%, signal=226%
KEGG_B_CELL_RECEPTOR_SIGNALING_PATHWAY	55	-0.205436	-1.80415	0.012474	0.0512108	0.732	2311	tags=47%, list=27%, signal=64%
KEGG_CALCIUM_SIGNALING_PATHWAY	59	-0.192664	-1.79853	0.00801603	0.0516545	0.748	1708	tags=39%, list=20%, signal=48%
KEGG_FC_GAMMA_R_MEDIATED_PHAGOCYTOSIS	72	-0.179227	-1.79652	0.014433	0.0508349	0.751	3967	tags=64%, list=46%, signal=118%
KEGG_CARDIAC_MUSCLE_CONTRACTION	40	-0.236682	-1.76308	0.0177515	0.0588669	0.805	2275	tags=50%, list=26%, signal=68%
KEGG_PROXIMAL_TUBULE_BICARBONATE_RECLAMATION	17	-0.362776	-1.75839	0.014433	0.0588319	0.815	2452	tags=65%, list=29%, signal=90%
KEGG_PRIMARY_IMMUNODEFICIENCY	12	-0.417831	-1.74628	0.0136187	0.0617561	0.831	2146	tags=67%, list=25%, signal=89%
KEGG_O_GLYCAN_BIOSYNTHESIS	14	-0.390187	-1.74115	0.0184426	0.0621863	0.84	3408	tags=79%, list=40%, signal=130%
KEGG_HUNTINGTONS_DISEASE	129	-0.128792	-1.73306	0.036	0.063791	0.86	4510	tags=65%, list=52%, signal=135%
KEGG_MISMATCH_REPAIR	22	-0.298459	-1.71355	0.0258449	0.0687605	0.885	5259	tags=91%, list=61%, signal=233%
KEGG_TYROSINE_METABOLISM	23	-0.299294	-1.71029	0.0275591	0.0682676	0.888	1547	tags=48%, list=18%, signal=58%
KEGG_GLYCINE_SERINE_AND_THREONINE_METABOLISM	24	-0.284087	-1.64802	0.0432331	0.0917961	0.944	2223	tags=54%, list=26%, signal=73%
KEGG_DNA_REPLICATION	36	-0.224986	-1.62946	0.0483559	0.0972065	0.954	5002	tags=81%, list=58%, signal=192%
KEGG_INSULIN_SIGNALING_PATHWAY	90	-0.146847	-1.62492	0.0354167	0.0972957	0.959	2478	tags=43%, list=29%, signal=60%
KEGG_NATURAL_KILLER_CELL_MEDIATED_CYTOTOXICITY	52	-0.189392	-1.61606	0.0529412	0.100031	0.965	3509	tags=60%, list=41%, signal=100%
KEGG_ARACHIDONIC_ACID_METABOLISM	25	-0.270904	-1.60754	0.0350515	0.101705	0.967	1462	tags=44%, list=17%, signal=53%
KEGG_TRYPTOPHAN_METABOLISM	28	-0.250067	-1.57616	0.0535373	0.116735	0.983	1236	tags=39%, list=14%, signal=46%
KEGG_P53_SIGNALING_PATHWAY	28	-0.245734	-1.56417	0.0657371	0.121808	0.985	3116	tags=61%, list=36%, signal=95%
KEGG_AMINOACYL_TRNA_BIOSYNTHESIS	40	-0.197196	-1.5082	0.0581395	0.154575	0.998	6913	tags=100%, list=80%, signal=507%
KEGG_CHEMOKINE_SIGNALING_PATHWAY	87	-0.136288	-1.49056	0.0612648	0.164329	0.999	2004	tags=37%, list=23%, signal=47%
KEGG_INOSITOL_PHOSPHATE_METABOLISM	41	-0.194877	-1.48713	0.0764588	0.163683	0.999	5255	tags=80%, list=61%, signal=206%
KEGG_BETA_ALANINE_METABOLISM	16	-0.311626	-1.4859	0.0643154	0.161617	1	4851	tags=88%, list=56%, signal=200%
KEGG_NEUROACTIVE_LIGAND_RECEPTOR_INTERACTION	13	-0.339261	-1.46508	0.0897959	0.174055	1	1057	tags=46%, list=12%, signal=53%
KEGG_UBIQUITIN_MEDIATED_PROTEOLYSIS	92	-0.129796	-1.46136	0.0794574	0.17423	1	6188	tags=85%, list=72%, signal=299%
KEGG_LEISHMANIA_INFECTION	36	-0.198077	-1.44025	0.100604	0.187085	1	6188	tags=92%, list=72%, signal=325%
KEGG_GLYCEROLIPID_METABOLISM	32	-0.209617	-1.41933	0.112051	0.201352	1	3580	tags=63%, list=42%, signal=107%
KEGG_ADIPOCYTOKINE_SIGNALING_PATHWAY	41	-0.182541	-1.41082	0.0979592	0.205343	1	2424	tags=46%, list=28%, signal=64%
KEGG_BUTANOATE_METABOLISM	25	-0.236735	-1.41055	0.0825336	0.202389	1	4851	tags=80%, list=56%, signal=183%
KEGG_FATTY_ACID_METABOLISM	31	-0.211001	-1.40598	0.10251	0.203019	1	4851	tags=77%, list=56%, signal=177%
KEGG_BIOSYNTHESIS_OF_UNSATURATED_FATTY_ACIDS	13	-0.317734	-1.39841	0.106157	0.206825	1	3888	tags=77%, list=45%, signal=140%
KEGG_PHENYLALANINE_METABOLISM	13	-0.313649	-1.39276	0.123753	0.208509	1	2600	tags=62%, list=30%, signal=88%
KEGG_GLIOMA	37	-0.196486	-1.38672	0.151767	0.210873	1	3432	tags=59%, list=40%, signal=99%
KEGG_FRUCTOSE_AND_MANNOSE_METABOLISM	32	-0.203052	-1.36908	0.108738	0.22199	1	6055	tags=91%, list=70%, signal=305%
KEGG_HISTIDINE_METABOLISM	22	-0.242852	-1.36532	0.12549	0.221872	1	1436	tags=41%, list=17%, signal=49%
KEGG_GALACTOSE_METABOLISM	20	-0.256993	-1.36091	0.131827	0.222406	1	5106	tags=85%, list=59%, signal=209%
KEGG_PHOSPHATIDYLINOSITOL_SIGNALING_SYSTEM	51	-0.156241	-1.3519	0.124236	0.226384	1	4230	tags=65%, list=49%, signal=127%
KEGG_ALDOSTERONE_REGULATED_SODIUM_REABSORPTION	22	-0.240838	-1.34396	0.136452	0.229957	1	2626	tags=55%, list=31%, signal=78%
KEGG_PROGESTERONE_MEDIATED_OOCYTE_MATURATION	49	-0.160141	-1.33174	0.146694	0.237914	1	4950	tags=73%, list=58%, signal=172%
KEGG_DRUG_METABOLISM_CYTOCHROME_P450	31	-0.19851	-1.31581	0.146341	0.248724	1	1629	tags=39%, list=19%, signal=48%
KEGG_GAP_JUNCTION	54	-0.146337	-1.29724	0.14433	0.264372	1	4643	tags=69%, list=54%, signal=148%
KEGG_VASOPRESSIN_REGULATED_WATER_REABSORPTION	32	-0.186916	-1.25917	0.166998	0.301218	1	4312	tags=69%, list=50%, signal=137%
KEGG_REGULATION_OF_AUTOPHAGY	13	-0.278901	-1.23479	0.202869	0.324817	1	4883	tags=85%, list=57%, signal=195%
KEGG_ASCORBATE_AND_ALDARATE_METABOLISM	10	-0.311758	-1.22457	0.2	0.333351	1	4203	tags=80%, list=49%, signal=156%
KEGG_LONG_TERM_DEPRESSION	39	-0.166659	-1.20828	0.237395	0.348967	1	3205	tags=54%, list=37%, signal=85%
KEGG_LONG_TERM_POTENTIATION	40	-0.160981	-1.19723	0.242308	0.35799	1	4643	tags=70%, list=54%, signal=151%
KEGG_ETHER_LIPID_METABOLISM	17	-0.246047	-1.18573	0.237052	0.368064	1	2948	tags=59%, list=34%, signal=89%
KEGG_ACUTE_MYELOID_LEUKEMIA	37	-0.163835	-1.17877	0.25	0.372673	1	2317	tags=43%, list=27%, signal=59%
KEGG_STEROID_HORMONE_BIOSYNTHESIS	13	-0.263511	-1.15989	0.280738	0.391931	1	2369	tags=54%, list=28%, signal=74%
KEGG_PANTOTHENATE_AND_COA_BIOSYNTHESIS	11	-0.290964	-1.15671	0.243902	0.391478	1	1411	tags=45%, list=16%, signal=54%
KEGG_JAK_STAT_SIGNALING_PATHWAY	40	-0.153972	-1.14276	0.284569	0.406308	1	2123	tags=40%, list=25%, signal=53%
KEGG_NEUROTROPHIN_SIGNALING_PATHWAY	81	-0.108766	-1.1424	0.25641	0.401951	1	6188	tags=83%, list=72%, signal=292%
KEGG_APOPTOSIS	60	-0.124473	-1.13544	0.308793	0.405814	1	5388	tags=75%, list=63%, signal=199%
KEGG_SPHINGOLIPID_METABOLISM	23	-0.197693	-1.122	0.313929	0.418636	1	4288	tags=70%, list=50%, signal=138%
KEGG_FC_EPSILON_RI_SIGNALING_PATHWAY	46	-0.140819	-1.12024	0.309198	0.416477	1	4966	tags=72%, list=58%, signal=169%
KEGG_GLYCEROPHOSPHOLIPID_METABOLISM	46	-0.136875	-1.09088	0.316981	0.452874	1	3878	tags=59%, list=45%, signal=106%
KEGG_MAPK_SIGNALING_PATHWAY	137	-0.0785704	-1.05859	0.385714	0.496695	1	7120	tags=91%, list=83%, signal=518%
KEGG_ALANINE_ASPARTATE_AND_GLUTAMATE_METABOLISM	25	-0.176676	-1.05504	0.355159	0.496383	1	5022	tags=76%, list=58%, signal=182%
KEGG_METABOLISM_OF_XENOBIOTICS_BY_CYTOCHROME_P450	28	-0.168389	-1.04397	0.383064	0.507894	1	1629	tags=36%, list=19%, signal=44%
KEGG_GLYOXYLATE_AND_DICARBOXYLATE_METABOLISM	15	-0.220773	-1.03961	0.403226	0.509746	1	3839	tags=67%, list=45%, signal=120%
KEGG_PATHOGENIC_ESCHERICHIA_COLI_INFECTION	39	-0.139218	-1.02803	0.404661	0.522925	1	4763	tags=69%, list=55%, signal=154%
KEGG_GLYCOSPHINGOLIPID_BIOSYNTHESIS_LACTO_AND_NEOLACTO_SERIES	14	-0.219909	-0.980648	0.493878	0.591559	1	4870	tags=79%, list=57%, signal=181%
KEGG_GNRH_SIGNALING_PATHWAY	57	-0.110085	-0.978591	0.468254	0.588626	1	4643	tags=65%, list=54%, signal=140%
KEGG_TOLL_LIKE_RECEPTOR_SIGNALING_PATHWAY	50	-0.115439	-0.978425	0.46748	0.58288	1	7098	tags=94%, list=83%, signal=535%
KEGG_CYSTEINE_AND_METHIONINE_METABOLISM	25	-0.16035	-0.972945	0.473684	0.585359	1	4474	tags=68%, list=52%, signal=141%
KEGG_EPITHELIAL_CELL_SIGNALING_IN_HELICOBACTER_PYLORI_INFECTION	47	-0.118236	-0.964831	0.492308	0.591872	1	5211	tags=72%, list=61%, signal=183%
KEGG_BLADDER_CANCER	22	-0.176021	-0.96053	0.517374	0.592928	1	3182	tags=55%, list=37%, signal=86%
KEGG_GLUTATHIONE_METABOLISM	40	-0.128738	-0.955425	0.470356	0.595116	1	5564	tags=78%, list=65%, signal=219%
KEGG_CELL_CYCLE	74	-0.0931713	-0.946374	0.503759	0.602902	1	4785	tags=65%, list=56%, signal=145%
KEGG_PORPHYRIN_AND_CHLOROPHYLL_METABOLISM	24	-0.158427	-0.924999	0.544204	0.631822	1	4734	tags=71%, list=55%, signal=157%
KEGG_ENDOCYTOSIS	132	-0.0685074	-0.919327	0.561587	0.635251	1	4633	tags=61%, list=54%, signal=129%
KEGG_PENTOSE_PHOSPHATE_PATHWAY	24	-0.156833	-0.918255	0.548757	0.631211	1	5106	tags=75%, list=59%, signal=184%
KEGG_MELANOMA	32	-0.132791	-0.905425	0.585687	0.646378	1	3432	tags=53%, list=40%, signal=88%
KEGG_NICOTINATE_AND_NICOTINAMIDE_METABOLISM	18	-0.181478	-0.90015	0.550584	0.64857	1	6088	tags=89%, list=71%, signal=304%
KEGG_AMYOTROPHIC_LATERAL_SCLEROSIS_ALS	36	-0.12415	-0.890792	0.603143	0.657489	1	7060	tags=94%, list=82%, signal=525%
KEGG_HEDGEHOG_SIGNALING_PATHWAY	10	-0.228289	-0.882632	0.606362	0.66488	1	4060	tags=70%, list=47%, signal=132%
KEGG_SELENOAMINO_ACID_METABOLISM	21	-0.161085	-0.866798	0.62753	0.682682	1	6400	tags=90%, list=74%, signal=353%
KEGG_DRUG_METABOLISM_OTHER_ENZYMES	26	-0.136935	-0.839223	0.649798	0.720626	1	150	tags=15%, list=2%, signal=16%
KEGG_T_CELL_RECEPTOR_SIGNALING_PATHWAY	65	-0.0867288	-0.834777	0.675248	0.721141	1	4950	tags=66%, list=58%, signal=155%
KEGG_PATHWAYS_IN_CANCER	173	-0.0521912	-0.787345	0.740125	0.78625	1	2345	tags=32%, list=27%, signal=44%
KEGG_PENTOSE_AND_GLUCURONATE_INTERCONVERSIONS	12	-0.179941	-0.770744	0.731518	0.804175	1	2039	tags=42%, list=24%, signal=55%
KEGG_OLFACTORY_TRANSDUCTION	10	-0.197322	-0.757423	0.753086	0.816755	1	4326	tags=70%, list=50%, signal=141%
KEGG_PROSTATE_CANCER	54	-0.0862305	-0.748355	0.777108	0.822452	1	2290	tags=35%, list=27%, signal=48%
KEGG_STEROID_BIOSYNTHESIS	11	-0.181363	-0.731049	0.789916	0.840028	1	3916	tags=64%, list=46%, signal=117%
KEGG_PANCREATIC_CANCER	48	-0.088946	-0.718877	0.816929	0.849028	1	3182	tags=46%, list=37%, signal=72%
KEGG_RETINOL_METABOLISM	13	-0.160914	-0.713347	0.829474	0.849405	1	3250	tags=54%, list=38%, signal=86%
KEGG_VEGF_SIGNALING_PATHWAY	45	-0.0904084	-0.710579	0.831915	0.845902	1	3432	tags=49%, list=40%, signal=81%
KEGG_DORSO_VENTRAL_AXIS_FORMATION	11	-0.175796	-0.704017	0.849174	0.847265	1	3182	tags=55%, list=37%, signal=86%
KEGG_MTOR_SIGNALING_PATHWAY	31	-0.102519	-0.683812	0.898039	0.864367	1	6058	tags=81%, list=70%, signal=272%
KEGG_RIBOSOME	77	0.438796	4.40345	0	0	0	2402	tags=71%, list=28%, signal=98%
KEGG_SPLICEOSOME	116	0.230978	2.97428	0	0.00025	0.001	5898	tags=91%, list=69%, signal=287%
KEGG_NITROGEN_METABOLISM	16	0.418278	2.02597	0.004	0.0483213	0.265	1246	tags=56%, list=14%, signal=66%
KEGG_CYTOSOLIC_DNA_SENSING_PATHWAY	32	0.291171	1.98693	0.002079	0.04901	0.337	4223	tags=78%, list=49%, signal=153%
KEGG_ADHERENS_JUNCTION	61	0.184866	1.7243	0.0255319	0.177017	0.84	2086	tags=43%, list=24%, signal=56%
KEGG_HOMOLOGOUS_RECOMBINATION	14	0.371535	1.6841	0.0271399	0.182215	0.899	5409	tags=100%, list=63%, signal=269%
KEGG_BASE_EXCISION_REPAIR	21	0.284993	1.55815	0.0458333	0.285364	0.988	5335	tags=90%, list=62%, signal=238%
KEGG_PYRIMIDINE_METABOLISM	82	0.143604	1.52193	0.0815534	0.29559	0.995	6327	tags=88%, list=74%, signal=329%
KEGG_NOTCH_SIGNALING_PATHWAY	22	0.266697	1.51502	0.0674603	0.27042	0.997	3184	tags=64%, list=37%, signal=101%
KEGG_RNA_POLYMERASE	24	0.258124	1.51101	0.0762712	0.247931	0.997	6027	tags=96%, list=70%, signal=319%
KEGG_BASAL_TRANSCRIPTION_FACTORS	21	0.257889	1.40829	0.112648	0.351036	1	5158	tags=86%, list=60%, signal=214%
KEGG_TGF_BETA_SIGNALING_PATHWAY	42	0.170495	1.33713	0.128631	0.429009	1	4478	tags=69%, list=52%, signal=143%
KEGG_THYROID_CANCER	17	0.24726	1.23952	0.207921	0.573642	1	5465	tags=88%, list=64%, signal=242%
KEGG_RNA_DEGRADATION	51	0.14275	1.21456	0.223577	0.583466	1	7210	tags=98%, list=84%, signal=603%
KEGG_OTHER_GLYCAN_DEGRADATION	14	0.259342	1.19896	0.210638	0.57492	1	5758	tags=93%, list=67%, signal=281%
KEGG_TERPENOID_BACKBONE_BIOSYNTHESIS	12	0.280197	1.1802	0.253192	0.574667	1	5476	tags=92%, list=64%, signal=252%
KEGG_ONE_CARBON_POOL_BY_FOLATE	15	0.25032	1.1657	0.257253	0.567985	1	6450	tags=100%, list=75%, signal=399%
KEGG_RIG_I_LIKE_RECEPTOR_SIGNALING_PATHWAY	39	0.157803	1.15964	0.2643	0.547161	1	6366	tags=90%, list=74%, signal=344%
KEGG_TIGHT_JUNCTION	86	0.104299	1.12954	0.293436	0.573447	1	2011	tags=34%, list=23%, signal=44%
KEGG_RIBOFLAVIN_METABOLISM	12	0.255123	1.08743	0.350476	0.623747	1	6408	tags=100%, list=75%, signal=392%
KEGG_SMALL_CELL_LUNG_CANCER	55	0.123549	1.08157	0.361963	0.605423	1	2696	tags=44%, list=31%, signal=63%
KEGG_BASAL_CELL_CARCINOMA	10	0.255995	0.97479	0.472617	0.789726	1	5540	tags=90%, list=64%, signal=253%
KEGG_NUCLEOTIDE_EXCISION_REPAIR	37	0.132964	0.968931	0.459184	0.767618	1	7228	tags=97%, list=84%, signal=607%
KEGG_ABC_TRANSPORTERS	19	0.182907	0.958952	0.49187	0.756264	1	240	tags=21%, list=3%, signal=22%
KEGG_CYTOKINE_CYTOKINE_RECEPTOR_INTERACTION	30	0.133061	0.868065	0.602362	0.911031	1	2012	tags=37%, list=23%, signal=48%
KEGG_AXON_GUIDANCE	71	0.0846656	0.849111	0.648148	0.913769	1	7029	tags=90%, list=82%, signal=489%
KEGG_MELANOGENESIS	42	0.108392	0.833265	0.652778	0.911349	1	5419	tags=74%, list=63%, signal=199%
KEGG_NOD_LIKE_RECEPTOR_SIGNALING_PATHWAY	40	0.109346	0.806965	0.708415	0.928222	1	4223	tags=60%, list=49%, signal=117%
KEGG_WNT_SIGNALING_PATHWAY	72	0.0801673	0.798911	0.730315	0.910448	1	7557	tags=96%, list=88%, signal=784%
KEGG_ERBB_SIGNALING_PATHWAY	58	0.0876198	0.779536	0.738372	0.913932	1	3254	tags=47%, list=38%, signal=74%
KEGG_LYSINE_DEGRADATION	36	0.105234	0.741501	0.797665	0.946865	1	5070	tags=69%, list=59%, signal=168%
KEGG_RENAL_CELL_CARCINOMA	46	0.0927306	0.741044	0.813627	0.918035	1	2571	tags=39%, list=30%, signal=56%
KEGG_CHRONIC_MYELOID_LEUKEMIA	54	0.0834352	0.710156	0.830739	0.933554	1	4223	tags=57%, list=49%, signal=112%
KEGG_NON_SMALL_CELL_LUNG_CANCER	37	0.0939492	0.680497	0.866525	0.943837	1	2681	tags=41%, list=31%, signal=59%
KEGG_ENDOMETRIAL_CANCER	38	0.0853404	0.635003	0.918972	0.966086	1	3342	tags=47%, list=39%, signal=77%
KEGG_COLORECTAL_CANCER	42	0.0782337	0.601486	0.945783	0.967646	1	4039	tags=55%, list=47%, signal=103%
KEGG_TYPE_II_DIABETES_MELLITUS	20	0.1	0.525866	0.988095	0.981817	1	431	tags=15%, list=5%, signal=16%

## Sheet: G12D vs WT Protein
Timestamp	1502210322893
NAME	SIZE	ES	NES	NOM p-val	FDR q-val	FWER p-val	RANK AT MAX	LEADING EDGE
KEGG_COMPLEMENT_AND_COAGULATION_CASCADES	43	-0.614	-4.72462	0	0	0	2347	tags=88%, list=27%, signal=121%
KEGG_CELL_ADHESION_MOLECULES_CAMS	56	-0.342613	-2.93589	0	0.000268	0.001	1988	tags=57%, list=23%, signal=74%
KEGG_HEMATOPOIETIC_CELL_LINEAGE	23	-0.456641	-2.60168	0	0.00112255	0.006	2067	tags=70%, list=24%, signal=91%
KEGG_ECM_RECEPTOR_INTERACTION	56	-0.290329	-2.51178	0	0.00126513	0.009	3049	tags=64%, list=35%, signal=99%
KEGG_PRION_DISEASES	26	-0.389388	-2.37835	0	0.00323133	0.029	2947	tags=73%, list=34%, signal=111%
KEGG_ANTIGEN_PROCESSING_AND_PRESENTATION	31	-0.352956	-2.34818	0.00197239	0.00307002	0.032	3912	tags=81%, list=45%, signal=147%
KEGG_HYPERTROPHIC_CARDIOMYOPATHY_HCM	43	-0.247049	-1.9472	0.0137525	0.0419655	0.404	1487	tags=42%, list=17%, signal=50%
KEGG_DILATED_CARDIOMYOPATHY	43	-0.223677	-1.75959	0.012848	0.111193	0.806	1487	tags=40%, list=17%, signal=48%
KEGG_NEUROACTIVE_LIGAND_RECEPTOR_INTERACTION	13	-0.392266	-1.70681	0.0476191	0.130704	0.884	3248	tags=77%, list=38%, signal=123%
KEGG_PRIMARY_IMMUNODEFICIENCY	12	-0.389963	-1.60445	0.0447154	0.193846	0.964	5252	tags=100%, list=61%, signal=257%
KEGG_SYSTEMIC_LUPUS_ERYTHEMATOSUS	31	-0.234502	-1.55259	0.0464135	0.224046	0.985	1598	tags=42%, list=19%, signal=51%
KEGG_LYSOSOME	95	-0.126656	-1.44152	0.0718563	0.332125	1	6528	tags=88%, list=76%, signal=363%
KEGG_ARGININE_AND_PROLINE_METABOLISM	44	-0.179194	-1.39828	0.105263	0.368538	1	1986	tags=41%, list=23%, signal=53%
KEGG_PPAR_SIGNALING_PATHWAY	43	-0.182307	-1.37685	0.124731	0.373013	1	1041	tags=30%, list=12%, signal=34%
KEGG_SPLICEOSOME	116	-0.107131	-1.35501	0.141454	0.380828	1	7099	tags=93%, list=83%, signal=526%
KEGG_ARRHYTHMOGENIC_RIGHT_VENTRICULAR_CARDIOMYOPATHY_ARVC	43	-0.176931	-1.34583	0.126459	0.370258	1	1487	tags=35%, list=17%, signal=42%
KEGG_ARACHIDONIC_ACID_METABOLISM	25	-0.218192	-1.32596	0.146341	0.377603	1	6386	tags=96%, list=74%, signal=372%
KEGG_PYRUVATE_METABOLISM	35	-0.189425	-1.31564	0.145068	0.370586	1	4030	tags=66%, list=47%, signal=123%
KEGG_LEUKOCYTE_TRANSENDOTHELIAL_MIGRATION	77	-0.1257	-1.30572	0.150685	0.365446	1	2392	tags=40%, list=28%, signal=55%
KEGG_PROTEIN_EXPORT	18	-0.242005	-1.23859	0.191147	0.447414	1	4613	tags=78%, list=54%, signal=167%
KEGG_LEISHMANIA_INFECTION	36	-0.161944	-1.16527	0.25	0.547975	1	3153	tags=53%, list=37%, signal=83%
KEGG_GLYOXYLATE_AND_DICARBOXYLATE_METABOLISM	15	-0.237934	-1.12515	0.300395	0.597479	1	5985	tags=93%, list=70%, signal=306%
KEGG_FOCAL_ADHESION	132	-0.0829933	-1.12352	0.289017	0.57487	1	3077	tags=44%, list=36%, signal=67%
KEGG_P53_SIGNALING_PATHWAY	28	-0.164539	-1.03273	0.390852	0.729581	1	3812	tags=61%, list=44%, signal=109%
KEGG_HISTIDINE_METABOLISM	22	-0.178734	-1.008	0.443763	0.753774	1	1986	tags=41%, list=23%, signal=53%
KEGG_GLYCINE_SERINE_AND_THREONINE_METABOLISM	24	-0.168727	-1.00651	0.452242	0.727771	1	2854	tags=50%, list=33%, signal=75%
KEGG_CYTOKINE_CYTOKINE_RECEPTOR_INTERACTION	30	-0.15422	-0.997983	0.439604	0.71859	1	1546	tags=33%, list=18%, signal=40%
KEGG_PHENYLALANINE_METABOLISM	13	-0.222877	-0.968609	0.474308	0.750415	1	4041	tags=69%, list=47%, signal=130%
KEGG_SNARE_INTERACTIONS_IN_VESICULAR_TRANSPORT	32	-0.140056	-0.929626	0.510848	0.803983	1	6326	tags=88%, list=74%, signal=330%
KEGG_VIRAL_MYOCARDITIS	31	-0.13646	-0.927508	0.533333	0.78135	1	6322	tags=87%, list=74%, signal=328%
KEGG_CARDIAC_MUSCLE_CONTRACTION	40	-0.124299	-0.915574	0.551383	0.778516	1	3237	tags=50%, list=38%, signal=80%
KEGG_B_CELL_RECEPTOR_SIGNALING_PATHWAY	55	-0.102718	-0.913525	0.543569	0.758149	1	1156	tags=24%, list=13%, signal=27%
KEGG_TYROSINE_METABOLISM	23	-0.158589	-0.904853	0.560694	0.750594	1	2006	tags=39%, list=23%, signal=51%
KEGG_LYSINE_DEGRADATION	36	-0.124046	-0.890296	0.58547	0.756042	1	4672	tags=67%, list=54%, signal=145%
KEGG_NATURAL_KILLER_CELL_MEDIATED_CYTOTOXICITY	52	-0.104127	-0.884174	0.594378	0.745665	1	6884	tags=90%, list=80%, signal=450%
KEGG_VASCULAR_SMOOTH_MUSCLE_CONTRACTION	55	-0.09692	-0.846178	0.642998	0.790164	1	3551	tags=51%, list=41%, signal=86%
KEGG_PATHOGENIC_ESCHERICHIA_COLI_INFECTION	39	-0.108557	-0.793078	0.71785	0.858934	1	5246	tags=72%, list=61%, signal=183%
KEGG_GLYCOSAMINOGLYCAN_DEGRADATION	12	-0.179436	-0.756623	0.791667	0.894286	1	4910	tags=75%, list=57%, signal=175%
KEGG_MISMATCH_REPAIR	22	-0.129867	-0.736022	0.801961	0.903185	1	7487	tags=100%, list=87%, signal=771%
KEGG_CYTOSOLIC_DNA_SENSING_PATHWAY	32	-0.10901	-0.728591	0.82874	0.891313	1	4442	tags=63%, list=52%, signal=129%
KEGG_TRYPTOPHAN_METABOLISM	28	-0.116209	-0.707558	0.849257	0.897576	1	3612	tags=54%, list=42%, signal=92%
KEGG_ASCORBATE_AND_ALDARATE_METABOLISM	10	-0.180326	-0.69838	0.858847	0.888065	1	3612	tags=60%, list=42%, signal=103%
KEGG_DNA_REPLICATION	36	-0.0871477	-0.617969	0.912065	0.949902	1	7138	tags=92%, list=83%, signal=537%
KEGG_CHEMOKINE_SIGNALING_PATHWAY	87	-0.0453303	-0.491275	0.993865	0.990864	1	7622	tags=93%, list=89%, signal=810%
KEGG_RIBOSOME	77	0.399452	4.18231	0	0	0	1062	tags=52%, list=12%, signal=59%
KEGG_AMINOACYL_TRNA_BIOSYNTHESIS	40	0.54486	4.10394	0	0	0	2645	tags=85%, list=31%, signal=122%
KEGG_PROGESTERONE_MEDIATED_OOCYTE_MATURATION	49	0.314862	2.59737	0	0.00242804	0.005	3976	tags=78%, list=46%, signal=143%
KEGG_OOCYTE_MEIOSIS	60	0.270414	2.48726	0	0.00631158	0.017	5573	tags=92%, list=65%, signal=259%
KEGG_METABOLISM_OF_XENOBIOTICS_BY_CYTOCHROME_P450	28	0.344094	2.18023	0.0020284	0.0405597	0.135	2578	tags=64%, list=30%, signal=92%
KEGG_DRUG_METABOLISM_CYTOCHROME_P450	31	0.314152	2.09373	0.00400802	0.0554823	0.217	2578	tags=61%, list=30%, signal=87%
KEGG_PENTOSE_PHOSPHATE_PATHWAY	24	0.356887	2.08797	0	0.0489528	0.222	4105	tags=83%, list=48%, signal=159%
KEGG_TYPE_II_DIABETES_MELLITUS	20	0.382751	2.05899	0.0120724	0.0523933	0.26	2735	tags=70%, list=32%, signal=102%
KEGG_AMINO_SUGAR_AND_NUCLEOTIDE_SUGAR_METABOLISM	41	0.264716	2.0171	0.00389864	0.0604875	0.322	4865	tags=83%, list=57%, signal=190%
KEGG_GNRH_SIGNALING_PATHWAY	57	0.213225	1.95174	0.00772201	0.0807428	0.441	3609	tags=63%, list=42%, signal=108%
KEGG_ERBB_SIGNALING_PATHWAY	58	0.212274	1.92431	0.00207469	0.0861407	0.491	5303	tags=83%, list=62%, signal=214%
KEGG_MTOR_SIGNALING_PATHWAY	31	0.294305	1.92219	0.0128676	0.0797882	0.494	4690	tags=84%, list=55%, signal=184%
KEGG_STEROID_BIOSYNTHESIS	11	0.473746	1.92183	0.00197239	0.0739004	0.494	4530	tags=100%, list=53%, signal=211%
KEGG_OTHER_GLYCAN_DEGRADATION	14	0.419054	1.87816	0.016129	0.0875449	0.578	5001	tags=100%, list=58%, signal=239%
KEGG_ENDOMETRIAL_CANCER	38	0.253077	1.86916	0.0122699	0.0856416	0.587	4169	tags=74%, list=48%, signal=142%
KEGG_SELENOAMINO_ACID_METABOLISM	21	0.343097	1.84109	0.0119522	0.0943951	0.651	4427	tags=86%, list=51%, signal=176%
KEGG_GLYCOSPHINGOLIPID_BIOSYNTHESIS_LACTO_AND_NEOLACTO_SERIES	14	0.410486	1.83544	0.00932836	0.0914751	0.663	3846	tags=86%, list=45%, signal=155%
KEGG_NON_SMALL_CELL_LUNG_CANCER	37	0.249193	1.78321	0.0173077	0.115912	0.762	5303	tags=86%, list=62%, signal=225%
KEGG_FATTY_ACID_METABOLISM	31	0.258761	1.74272	0.0181087	0.13855	0.834	5272	tags=87%, list=61%, signal=224%
KEGG_TERPENOID_BACKBONE_BIOSYNTHESIS	12	0.414998	1.73956	0.0217391	0.134148	0.844	5035	tags=100%, list=59%, signal=241%
KEGG_PHOSPHATIDYLINOSITOL_SIGNALING_SYSTEM	51	0.208675	1.72105	0.0244898	0.141183	0.868	4117	tags=69%, list=48%, signal=131%
KEGG_RETINOL_METABOLISM	13	0.39197	1.70427	0.0252918	0.146596	0.891	2587	tags=69%, list=30%, signal=99%
KEGG_COLORECTAL_CANCER	42	0.220807	1.65367	0.0384615	0.177805	0.939	5276	tags=83%, list=61%, signal=215%
KEGG_DRUG_METABOLISM_OTHER_ENZYMES	26	0.271806	1.61708	0.0391389	0.201878	0.959	1307	tags=42%, list=15%, signal=50%
KEGG_PROSTATE_CANCER	54	0.184539	1.60534	0.0402414	0.205147	0.968	3996	tags=65%, list=46%, signal=120%
KEGG_ACUTE_MYELOID_LEUKEMIA	37	0.220846	1.59575	0.04158	0.206575	0.975	4616	tags=76%, list=54%, signal=163%
KEGG_RIBOFLAVIN_METABOLISM	12	0.370129	1.55445	0.0647182	0.241756	0.989	3987	tags=83%, list=46%, signal=155%
KEGG_FRUCTOSE_AND_MANNOSE_METABOLISM	32	0.227241	1.54154	0.0512334	0.248067	0.991	3427	tags=63%, list=40%, signal=104%
KEGG_NEUROTROPHIN_SIGNALING_PATHWAY	81	0.144961	1.52975	0.0654762	0.252424	0.995	6090	tags=85%, list=71%, signal=289%
KEGG_ONE_CARBON_POOL_BY_FOLATE	15	0.328868	1.52911	0.0617978	0.244757	0.995	4629	tags=87%, list=54%, signal=187%
KEGG_NITROGEN_METABOLISM	16	0.313024	1.52808	0.059501	0.237575	0.995	2687	tags=63%, list=31%, signal=91%
KEGG_THYROID_CANCER	17	0.305207	1.52416	0.0684105	0.234176	0.996	3450	tags=71%, list=40%, signal=118%
KEGG_FC_EPSILON_RI_SIGNALING_PATHWAY	46	0.186676	1.52215	0.0638723	0.229262	0.997	3450	tags=59%, list=40%, signal=97%
KEGG_CELL_CYCLE	74	0.152982	1.50993	0.0590631	0.23383	0.997	5319	tags=77%, list=62%, signal=200%
KEGG_GAP_JUNCTION	54	0.173917	1.50307	0.0796964	0.233783	0.998	3609	tags=59%, list=42%, signal=101%
KEGG_BUTANOATE_METABOLISM	25	0.247813	1.49706	0.0617284	0.232926	1	5098	tags=84%, list=59%, signal=206%
KEGG_GALACTOSE_METABOLISM	20	0.278904	1.48858	0.0821918	0.235194	1	3626	tags=70%, list=42%, signal=121%
KEGG_N_GLYCAN_BIOSYNTHESIS	33	0.222949	1.47779	0.077551	0.240487	1	6689	tags=100%, list=78%, signal=448%
KEGG_UBIQUITIN_MEDIATED_PROTEOLYSIS	92	0.130629	1.46733	0.0786948	0.245447	1	5805	tags=80%, list=68%, signal=245%
KEGG_PATHWAYS_IN_CANCER	173	0.0961731	1.46108	0.0813492	0.246285	1	5303	tags=71%, list=62%, signal=182%
KEGG_CALCIUM_SIGNALING_PATHWAY	59	0.159686	1.45939	0.0756144	0.242135	1	3008	tags=51%, list=35%, signal=78%
KEGG_PYRIMIDINE_METABOLISM	82	0.139034	1.45532	0.0925197	0.240311	1	4583	tags=67%, list=53%, signal=142%
KEGG_GLYCEROPHOSPHOLIPID_METABOLISM	46	0.180368	1.4515	0.0967078	0.238542	1	3317	tags=57%, list=39%, signal=92%
KEGG_STARCH_AND_SUCROSE_METABOLISM	27	0.229074	1.44038	0.0694445	0.245139	1	4087	tags=70%, list=48%, signal=134%
KEGG_APOPTOSIS	60	0.158626	1.43056	0.0886076	0.249403	1	4521	tags=68%, list=53%, signal=143%
KEGG_STEROID_HORMONE_BIOSYNTHESIS	13	0.323127	1.42362	0.100823	0.250843	1	532	tags=38%, list=6%, signal=41%
KEGG_CITRATE_CYCLE_TCA_CYCLE	29	0.218113	1.42306	0.109195	0.24624	1	6433	tags=97%, list=75%, signal=382%
KEGG_GLUTATHIONE_METABOLISM	40	0.189252	1.40127	0.116279	0.264883	1	3539	tags=60%, list=41%, signal=101%
KEGG_PEROXISOME	58	0.153005	1.38424	0.111332	0.276937	1	5661	tags=81%, list=66%, signal=236%
KEGG_GLIOMA	37	0.194905	1.38409	0.128968	0.271608	1	5303	tags=81%, list=62%, signal=211%
KEGG_CYSTEINE_AND_METHIONINE_METABOLISM	25	0.230321	1.38375	0.0949495	0.266631	1	4560	tags=76%, list=53%, signal=161%
KEGG_PANCREATIC_CANCER	48	0.166063	1.37398	0.119843	0.271935	1	3058	tags=52%, list=36%, signal=80%
KEGG_LONG_TERM_DEPRESSION	39	0.189323	1.35851	0.153535	0.284031	1	3450	tags=59%, list=40%, signal=98%
KEGG_JAK_STAT_SIGNALING_PATHWAY	40	0.17979	1.35583	0.133745	0.281627	1	5340	tags=80%, list=62%, signal=210%
KEGG_ALDOSTERONE_REGULATED_SODIUM_REABSORPTION	22	0.24211	1.35524	0.126	0.277237	1	3004	tags=59%, list=35%, signal=91%
KEGG_TIGHT_JUNCTION	86	0.124383	1.34547	0.120388	0.28273	1	2640	tags=43%, list=31%, signal=61%
KEGG_REGULATION_OF_AUTOPHAGY	13	0.302416	1.33692	0.127701	0.286263	1	3356	tags=69%, list=39%, signal=113%
KEGG_ALZHEIMERS_DISEASE	120	0.105149	1.33001	0.142308	0.28967	1	4984	tags=68%, list=58%, signal=160%
KEGG_AXON_GUIDANCE	71	0.134154	1.32641	0.156627	0.288753	1	3821	tags=58%, list=44%, signal=103%
KEGG_ALANINE_ASPARTATE_AND_GLUTAMATE_METABOLISM	25	0.221691	1.32591	0.135729	0.284352	1	4634	tags=76%, list=54%, signal=164%
KEGG_SMALL_CELL_LUNG_CANCER	55	0.147795	1.31668	0.143403	0.289442	1	5147	tags=75%, list=60%, signal=184%
KEGG_MELANOGENESIS	42	0.168035	1.30508	0.14433	0.296787	1	3680	tags=60%, list=43%, signal=104%
KEGG_ADHERENS_JUNCTION	61	0.143289	1.29848	0.168932	0.299493	1	2723	tags=46%, list=32%, signal=67%
KEGG_O_GLYCAN_BIOSYNTHESIS	14	0.288959	1.28595	0.178715	0.30933	1	6118	tags=100%, list=71%, signal=346%
KEGG_RIG_I_LIKE_RECEPTOR_SIGNALING_PATHWAY	39	0.173512	1.27772	0.162325	0.314061	1	6011	tags=87%, list=70%, signal=288%
KEGG_CHRONIC_MYELOID_LEUKEMIA	54	0.147949	1.26752	0.149893	0.321674	1	5105	tags=74%, list=59%, signal=181%
KEGG_OLFACTORY_TRANSDUCTION	10	0.330151	1.26227	0.190476	0.322935	1	4903	tags=90%, list=57%, signal=209%
KEGG_INSULIN_SIGNALING_PATHWAY	90	0.113853	1.2493	0.20381	0.333772	1	4859	tags=68%, list=57%, signal=154%
KEGG_NICOTINATE_AND_NICOTINAMIDE_METABOLISM	18	0.23469	1.22411	0.210421	0.360882	1	4196	tags=72%, list=49%, signal=141%
KEGG_PURINE_METABOLISM	116	0.0966078	1.22244	0.211462	0.357547	1	7038	tags=91%, list=82%, signal=496%
KEGG_INOSITOL_PHOSPHATE_METABOLISM	41	0.161202	1.20548	0.224949	0.373913	1	6590	tags=93%, list=77%, signal=395%
KEGG_HEDGEHOG_SIGNALING_PATHWAY	10	0.313038	1.20198	0.236686	0.372873	1	4190	tags=80%, list=49%, signal=156%
KEGG_RENAL_CELL_CARCINOMA	46	0.148713	1.20194	0.24165	0.36783	1	6953	tags=96%, list=81%, signal=497%
KEGG_LONG_TERM_POTENTIATION	40	0.158294	1.18465	0.246939	0.38563	1	5954	tags=85%, list=69%, signal=275%
KEGG_EPITHELIAL_CELL_SIGNALING_IN_HELICOBACTER_PYLORI_INFECTION	47	0.141958	1.17042	0.243856	0.400202	1	5921	tags=83%, list=69%, signal=265%
KEGG_PENTOSE_AND_GLUCURONATE_INTERCONVERSIONS	12	0.27748	1.16773	0.244306	0.398284	1	1916	tags=50%, list=22%, signal=64%
KEGG_ABC_TRANSPORTERS	19	0.220555	1.16572	0.258621	0.395889	1	3538	tags=63%, list=41%, signal=107%
KEGG_MELANOMA	32	0.170664	1.14226	0.296813	0.423381	1	5793	tags=84%, list=67%, signal=258%
KEGG_WNT_SIGNALING_PATHWAY	72	0.114342	1.1414	0.288	0.419156	1	5235	tags=72%, list=61%, signal=183%
KEGG_OXIDATIVE_PHOSPHORYLATION	99	0.0967432	1.11762	0.309917	0.446942	1	5518	tags=74%, list=64%, signal=203%
KEGG_T_CELL_RECEPTOR_SIGNALING_PATHWAY	65	0.11511	1.1011	0.308943	0.464745	1	5235	tags=72%, list=61%, signal=183%
KEGG_RNA_DEGRADATION	51	0.130934	1.10046	0.331349	0.460024	1	5962	tags=82%, list=69%, signal=267%
KEGG_SPHINGOLIPID_METABOLISM	23	0.191452	1.09118	0.34308	0.468372	1	6583	tags=96%, list=77%, signal=407%
KEGG_HOMOLOGOUS_RECOMBINATION	14	0.245266	1.08951	0.326572	0.465377	1	4036	tags=71%, list=47%, signal=134%
KEGG_HUNTINGTONS_DISEASE	129	0.0823594	1.07409	0.353635	0.482216	1	6168	tags=80%, list=72%, signal=278%
KEGG_VALINE_LEUCINE_AND_ISOLEUCINE_DEGRADATION	43	0.132757	1.05232	0.384615	0.508648	1	6063	tags=84%, list=71%, signal=282%
KEGG_ENDOCYTOSIS	132	0.0776614	1.0427	0.387424	0.516885	1	7355	tags=93%, list=86%, signal=634%
KEGG_NUCLEOTIDE_EXCISION_REPAIR	37	0.142281	1.04036	0.371607	0.514579	1	2732	tags=46%, list=32%, signal=67%
KEGG_TOLL_LIKE_RECEPTOR_SIGNALING_PATHWAY	50	0.12655	1.03993	0.392857	0.509485	1	5969	tags=82%, list=69%, signal=266%
KEGG_BLADDER_CANCER	22	0.183938	1.03006	0.392233	0.519005	1	3503	tags=59%, list=41%, signal=99%
KEGG_VEGF_SIGNALING_PATHWAY	45	0.132749	1.02689	0.401174	0.518254	1	3450	tags=53%, list=40%, signal=89%
KEGG_NOTCH_SIGNALING_PATHWAY	22	0.176434	1.01011	0.418288	0.538816	1	5131	tags=77%, list=60%, signal=191%
KEGG_PROTEASOME	40	0.132827	0.993136	0.428291	0.559063	1	4882	tags=70%, list=57%, signal=161%
KEGG_ADIPOCYTOKINE_SIGNALING_PATHWAY	41	0.133185	0.97008	0.472868	0.591112	1	4942	tags=71%, list=57%, signal=165%
KEGG_BASAL_CELL_CARCINOMA	10	0.245867	0.962933	0.478682	0.597121	1	3907	tags=70%, list=45%, signal=128%
KEGG_PROPANOATE_METABOLISM	28	0.149673	0.959822	0.477419	0.595672	1	5166	tags=75%, list=60%, signal=187%
KEGG_BASAL_TRANSCRIPTION_FACTORS	21	0.175073	0.952525	0.485549	0.600888	1	6278	tags=90%, list=73%, signal=334%
KEGG_BIOSYNTHESIS_OF_UNSATURATED_FATTY_ACIDS	13	0.21193	0.941602	0.532946	0.612667	1	4133	tags=69%, list=48%, signal=133%
KEGG_NOD_LIKE_RECEPTOR_SIGNALING_PATHWAY	40	0.124533	0.934944	0.508368	0.617741	1	2373	tags=40%, list=28%, signal=55%
KEGG_PARKINSONS_DISEASE	99	0.0828162	0.933442	0.5074	0.614047	1	5897	tags=77%, list=69%, signal=241%
KEGG_BETA_ALANINE_METABOLISM	16	0.188432	0.91637	0.554639	0.634217	1	2144	tags=44%, list=25%, signal=58%
KEGG_DORSO_VENTRAL_AXIS_FORMATION	11	0.229215	0.909715	0.55	0.638698	1	3503	tags=64%, list=41%, signal=107%
KEGG_GLYCEROLIPID_METABOLISM	32	0.137459	0.907063	0.539715	0.636828	1	6615	tags=91%, list=77%, signal=391%
KEGG_VIBRIO_CHOLERAE_INFECTION	35	0.12426	0.849436	0.628866	0.72208	1	5569	tags=77%, list=65%, signal=218%
KEGG_GLYCOLYSIS_GLUCONEOGENESIS	48	0.103602	0.839798	0.666667	0.730425	1	3413	tags=50%, list=40%, signal=82%
KEGG_AMYOTROPHIC_LATERAL_SCLEROSIS_ALS	36	0.107076	0.767104	0.75154	0.836998	1	7682	tags=100%, list=89%, signal=933%
KEGG_REGULATION_OF_ACTIN_CYTOSKELETON	134	0.0573832	0.763792	0.754	0.834616	1	1952	tags=28%, list=23%, signal=36%
KEGG_ETHER_LIPID_METABOLISM	17	0.149194	0.758927	0.767123	0.834188	1	742	tags=24%, list=9%, signal=26%
KEGG_BASE_EXCISION_REPAIR	21	0.135208	0.741456	0.797189	0.851271	1	6620	tags=90%, list=77%, signal=392%
KEGG_PORPHYRIN_AND_CHLOROPHYLL_METABOLISM	24	0.125156	0.721113	0.83463	0.871316	1	5734	tags=79%, list=67%, signal=237%
KEGG_PROXIMAL_TUBULE_BICARBONATE_RECLAMATION	17	0.145986	0.71869	0.805501	0.866676	1	7346	tags=100%, list=85%, signal=684%
KEGG_MAPK_SIGNALING_PATHWAY	137	0.0510475	0.703219	0.855131	0.878653	1	6221	tags=77%, list=72%, signal=275%
KEGG_TGF_BETA_SIGNALING_PATHWAY	42	0.0911094	0.688994	0.860887	0.888142	1	7205	tags=93%, list=84%, signal=570%
KEGG_VASOPRESSIN_REGULATED_WATER_REABSORPTION	32	0.0919993	0.612871	0.924125	0.956305	1	3242	tags=47%, list=38%, signal=75%
KEGG_PANTOTHENATE_AND_COA_BIOSYNTHESIS	11	0.137872	0.551056	0.969136	0.988226	1	6633	tags=91%, list=77%, signal=397%
KEGG_RNA_POLYMERASE	24	0.0954214	0.542145	0.961924	0.983614	1	3839	tags=54%, list=45%, signal=98%
KEGG_FC_GAMMA_R_MEDIATED_PHAGOCYTOSIS	72	0.0529367	0.533446	0.98088	0.978767	1	6117	tags=76%, list=71%, signal=262%

## Sheet: A146T vs WT Scaled Phospho
Timestamp	1502210167819
NAME	SIZE	ES	NES	NOM p-val	FDR q-val	FWER p-val	RANK AT MAX	LEADING EDGE
CK2A1	88	-0.209271	-2.28134	0	0.0022544	0.009	5809	tags=85%, list=65%, signal=238%
SRC	14	-0.193771	-0.872828	0.597585	0.912783	1	7263	tags=100%, list=81%, signal=516%
MTOR	32	-0.0974838	-0.653361	0.883436	0.892265	1	7849	tags=97%, list=87%, signal=753%
PKACA	67	0.290753	2.76684	0	0	0	3448	tags=67%, list=38%, signal=108%
ERK2	75	0.221924	2.27405	0.00185874	0.0100933	0.012	3780	tags=64%, list=42%, signal=109%
ERK1	48	0.275141	2.17754	0.00671141	0.0124112	0.022	4663	tags=79%, list=52%, signal=163%
CDK2	85	0.197984	2.12387	0.00199203	0.012549	0.03	3000	tags=53%, list=33%, signal=79%
P90RSK	12	0.463449	1.9711	0.006	0.0246454	0.07	1084	tags=58%, list=12%, signal=66%
CDK5	24	0.30271	1.76823	0.0102881	0.0669487	0.212	2533	tags=58%, list=28%, signal=81%
CAMK2A	18	0.334842	1.70251	0.0216963	0.0795076	0.277	3493	tags=72%, list=39%, signal=118%
PKCA	11	0.395742	1.60324	0.0390144	0.11289	0.402	3807	tags=82%, list=42%, signal=142%
JNK1	16	0.276396	1.35324	0.125498	0.294395	0.794	1454	tags=44%, list=16%, signal=52%
HIPK2	10	0.332177	1.29143	0.162839	0.33156	0.859	5115	tags=90%, list=57%, signal=208%
PKG1	11	0.322291	1.28964	0.168317	0.30282	0.861	3649	tags=73%, list=41%, signal=122%
GSK3A	12	0.306124	1.27832	0.172676	0.289681	0.872	5500	tags=92%, list=61%, signal=235%
GSK3B	21	0.22876	1.25531	0.193613	0.28987	0.891	5233	tags=81%, list=58%, signal=193%
CDK1	81	0.116892	1.24191	0.183838	0.284082	0.904	4514	tags=62%, list=50%, signal=123%
P38A	22	0.198174	1.15385	0.254545	0.361265	0.968	2721	tags=50%, list=30%, signal=71%
CHK1	14	0.253297	1.13439	0.297087	0.35955	0.977	2867	tags=57%, list=32%, signal=84%
AKT1	28	0.141839	0.897323	0.552529	0.675087	0.998	3871	tags=57%, list=43%, signal=100%
EGFR	10	0.217145	0.845739	0.642586	0.717719	0.999	7050	tags=100%, list=78%, signal=460%
PLK1	12	0.181272	0.742421	0.788066	0.830747	1	7373	tags=100%, list=82%, signal=551%
PAK1	12	0.167668	0.71556	0.826176	0.822004	1	2243	tags=42%, list=25%, signal=55%

## Sheet: G12D vs WT Scaled Phospho
Timestamp	1502210147958
NAME	SIZE	ES	NES	NOM p-val	FDR q-val	FWER p-val	RANK AT MAX	LEADING EDGE
PAK1	12	-0.410847	-1.72905	0.0232108	0.184491	0.213	3810	tags=83%, list=42%, signal=144%
AKT1	28	-0.241756	-1.49552	0.0836576	0.316829	0.564	2333	tags=50%, list=26%, signal=67%
P90RSK	12	-0.342453	-1.46363	0.0870445	0.243142	0.624	2174	tags=58%, list=24%, signal=77%
PLK1	12	-0.291592	-1.22897	0.216049	0.470776	0.929	1881	tags=50%, list=21%, signal=63%
MTOR	32	-0.179503	-1.17946	0.253061	0.44879	0.961	4018	tags=63%, list=45%, signal=112%
GSK3B	21	-0.161575	-0.889945	0.583004	0.87463	1	4981	tags=71%, list=55%, signal=159%
PKACA	67	-0.0865678	-0.842778	0.6625	0.835963	1	840	tags=18%, list=9%, signal=20%
GSK3A	12	-0.18446	-0.771873	0.772	0.846573	1	2094	tags=42%, list=23%, signal=54%
PKCA	11	-0.156445	-0.626498	0.914583	0.919258	1	5961	tags=82%, list=66%, signal=242%
CK2A1	88	0.22298	2.42994	0	0.00411111	0.004	4150	tags=68%, list=46%, signal=125%
HIPK2	10	0.59682	2.29218	0	0.00583662	0.01	934	tags=70%, list=10%, signal=78%
ERK2	75	0.192062	1.97275	0.00968992	0.0283699	0.071	2606	tags=48%, list=29%, signal=67%
ERK1	48	0.15565	1.29344	0.16	0.589241	0.864	3107	tags=50%, list=35%, signal=76%
EGFR	10	0.320747	1.2361	0.204322	0.572638	0.908	3417	tags=70%, list=38%, signal=113%
SRC	14	0.250818	1.13438	0.296443	0.674564	0.966	6105	tags=93%, list=68%, signal=288%
P38A	22	0.188589	1.04029	0.373016	0.778544	0.992	1170	tags=32%, list=13%, signal=36%
CAMK2A	18	0.206976	1.03789	0.412475	0.686231	0.992	4642	tags=72%, list=52%, signal=149%
CDK1	81	0.100045	1.03711	0.372385	0.610999	0.992	4442	tags=59%, list=49%, signal=116%
CDK2	85	0.093776	0.99808	0.433198	0.61582	0.996	3082	tags=44%, list=34%, signal=66%
CHK1	14	0.202543	0.930443	0.544513	0.672288	1	6539	tags=93%, list=73%, signal=339%
PKG1	11	0.217523	0.871997	0.609856	0.711092	1	1317	tags=36%, list=15%, signal=43%
JNK1	16	0.182243	0.862013	0.63189	0.670477	1	2863	tags=50%, list=32%, signal=73%
CDK5	24	0.107554	0.627691	0.93047	0.919311	1	5411	tags=71%, list=60%, signal=177%

## Sheet: Nitrogen Metab
AccID	Gene	A146T:WT	G12D:WT
P13634	Ca1	1.82201	2.23416
Q8CI85	Ca12	1.1851	1.53021
F7CFA5	Glud1	0.695523	1.93642
Q8VHB5	Ca9	0.531915	1.47154
D3Z7P3	Gls	0	0.892323
P15105	Glul	0	0.578353
P26443	Glud1	0	0.255514
Q8VCN5	Cth	0.448732	0.243876
Q64444	Ca4	0.722876	0.393773
P00920	Ca2	0.610766	0
P35492	Hal	0.767538	0

## Sheet: Calcium Signaling
AccID	Gene	A146T:WT	G12D:WT
P29477	Nos2	-1.65208	0
O88427	Cacna1h	-0.992298	0
E9Q828	Atp2b4	-0.941652	0
Q6PDN3	Mylk	-0.929939	0
P21279	Gnaq	-0.686192	0.202183
Q8CIH5	Plcg2	-0.584312	0
P11881	Itpr1	-0.546647	0
Q9Z1M0	P2rx7	-0.51776	0
Q9Z0J4	Nos1	-0.483304	0
P48962	Slc25a4	-0.452134	0
P28652	Camk2b	-0.39063	0
P11798	Camk2a	-0.377043	0
Q91UZ1	Plcb4	-0.376547	0
P26618	Pdgfra	-0.344382	0
B2RXC2	Itpkb	-0.336868	0
Q9Z1B3	Plcb1	-0.276504	0
P56528	Cd38	-0.236552	0
Q64518	Atp2a3	-0.442351	0.202434
Q61481	Pde1a	-0.360101	0.208744
Q7TSH2	Phkb	-0.323226	0.180532
O55143	Atp2a2	-0.31662	0.260093
G5E829	Atp2b1	-0.238484	0.206399
G3X9J1	Slc8a1	0	0.224644
P05132	Prkaca	0	0.269282
Q62077	Plcg1	0	0.283485
Q01065	Pde1b	0	0.301307
P48455	Ppp3cc	0	0.308194
E9Q1T1	Camk2d	0	0.334467
Q922R0	Prkx	0	0.337504
Q4VA93	Prkca	0	0.36936
Q9QVP9	Ptk2b	0	0.382477
P51881	Slc25a5	0	0.424286
P51830	Adcy9	0	0.478958
Q8K4S1	Plce1	0	0.487529
P05622	Pdgfrb	0	0.564692
Q60931	Vdac3	0	0.657592
Q9Z329	Itpr2	0	0.670962
A3KGF7	Plcb2	0	0.703294
P63094	Gnas	0	0.763885
P70424	Erbb2	0	0.806831
P70227	Itpr3	-0.26768	0.762622
Q8R3B1	Plcd1	0	1.00997
P21278	Gna11	0	1.15609
Q61526	Erbb3	0	1.26217
P30677	Gna14	0	1.82228

## Sheet: ERK2
AccID	Gene	A146T:WT	G12D:WT
P97287_144	Mcl1_144	0.140198	2.32908
Q6NZJ6_1231	Eif4g1_1231	0.835865	2.76582
Q01279_695	Egfr_695	0.986028	2.21458
E9Q616_4890	Ahnak_4890	1.05426	2.12019
P58871_131	Tnks1bp1_131	0.757695	2.22062
P34152_948	Ptk2_948	0.496873	1.92836
Q9WVH4_424	Foxo3_424	0.448145	1.89511
E9Q616_5567	Ahnak_5567	0.48489	1.7675
Q60953_47	Pml_47	0.424783	1.51492
P70365_395	Ncoa1_395	0.828036	1.55982
Q6PDN3_1795	Mylk_1795	0.864355	1.60223
F6ZDS4_2223	Tpr_2223	1.11653	1.08871
O88935_62	Syn1_62	1.0071	0.582807
P10637_688	Mapt_688	0.699642	0.895646
Q60876_45	Eif4ebp1_45	0	1.58751
Q3UGS4_21	Fam195b_21	0	1.38662
Q8CHW4_540	Eif2b5_540	0	1.27724
E9Q616_217	Ahnak_217	-0.015178	1.15288
P62071_186	Rras2_186	0.052422	1.06068
Q8JZX4_222	Rbm17_222	0	0.949852
Q7TSC1_609	Prrc2a_609	0	0.908368
Q8K1M6_622	Dnm1l_622	0.023012	0.855271
Q8VI36_126	Pxn_126	0	0.804976
O89090_61	Sp1_61	-0.030096	0.770775
Q8JZX4_71	Rbm17_71	0.038225	0.725149
Q91YD3_335	Dcp1a_335	0	0.702397
O35737_104	Hnrnph1_104	0	0.655299
Q61165_697	Slc9a1_697	0	0.573588
P05627_246	Jun_246	0	0.558777
D3YXK2_366	Safb_366	0.129448	0.684879
P58468_38	Fam207a_38	0.195762	0.690377
Q01320_1350	Top2a_1350	0.173433	0.916267
Q7TPV4_1280	Mybbp1a_1280	0.26596	0.842081
P26645_46	Marcks_46	0.518343	0.542066
P54227_38	Stmn1_38	0.313499	0.519333
Q6PDN3_1801	Mylk_1801	-0.004407	0
Q9Z2D1_58	Mtmr2_58	0.021673	0
P46414_178	Cdkn1b_178	0.053601	0
Q8CBW3_183	Abi1_183	0.140395	0
O88935_67	Syn1_67	0.15004	0
Q8VI36_83	Pxn_83	0.159614	0
Q6ZQ58_751	Larp1_751	0.194824	0
P10637_696	Mapt_696	0.197067	0
Q80U35_695	Arhgef17_695	0.211434	0
P58871_1025	Tnks1bp1_1025	0.303938	0
P70302_575	Stim1_575	0.402651	0
P63085_185	Mapk1_185	0.522754	0
E9PVP1_655	Aim1_655	0.570016	0
P10637_473	Mapt_473	0.645786	0
P10637_497	Mapt_497	0.807822	0
Q7TSC1_1002	Prrc2a_1002	1.1294	0
P16951_53	Atf2_53	1.16818	0
P18653_352	Rps6ka1_352	1.22017	0
P46414_10	Cdkn1b_10	1.33977	0
Q99JX3_222	Gorasp2_222	1.51885	0
Q9D032_360	Ssbp3_360	1.5331	0
Q99JX3_225	Gorasp2_225	1.53658	0

## Sheet: P90RSK
AccID	Gene	A146T:WT	G12D:WT
A2A863-2_1366	Itgb4_1366	2.18924	-0.651858
Q62422_203	Ostf1_203	2.07624	0
Q61823_76	Pdcd4_76	1.92733	0
Q61165_707	Slc9a1_707	0.676163	0
Q8BTM8_2152	Flna_2152	1.18191	-0.62246
Q62245_1120	Sos1_1120	1.32258	-1.38309
P46414_10	Cdkn1b_10	1.33977	-1.73887
Q9QYG0_332	Ndrg2_332	0	-2.13883
Q61337_136	Bad_136	0	-1.67329
