# Supplementary material for: Tissue-Specific Oncogenic Activity of KRASA146T
Source: Oxford University Press journal article supplement (doi:10.1158/2159-8290.cd-18-1220), 2019-04-05
Supplement: 21598290cd181220-sup-210474_2_supp_5431443_pp59my.xlsx [file 21598290cd181220-sup-210474_2_supp_5431443_pp59my.xlsx]

## Sheet: Parameters
Table S12: GSEA analysis of pancreata expressing WT or mutant K-Ras.
Parameter
scoring_scheme	classic
norm	meandiv
makes_sets	true
set_max	500
rnd_seed	timestamp
set_min	10
nperm	1000

## Sheet: A146T vs WT Protein
Timestamp	1516983903752
NAME	SIZE	ES	NES	NOM p-val	FDR q-val	FWER p-val	RANK AT MAX	LEADING EDGE
KEGG_OXIDATIVE_PHOSPHORYLATION	89	-0.330268	-3.626	0	0	0	2398	tags=72%, list=39%, signal=117%
KEGG_PARKINSONS_DISEASE	87	-0.335434	-3.59154	0	0	0	2397	tags=72%, list=39%, signal=118%
KEGG_RIBOSOME	78	-0.348707	-3.57318	0	0	0	1652	tags=62%, list=27%, signal=83%
KEGG_ALZHEIMERS_DISEASE	102	-0.272777	-3.12318	0	0	0	2666	tags=71%, list=44%, signal=123%
KEGG_HUNTINGTONS_DISEASE	112	-0.235842	-3.00307	0	0	0	2397	tags=63%, list=39%, signal=101%
KEGG_ECM_RECEPTOR_INTERACTION	44	-0.375171	-2.92381	0	0	0	2715	tags=82%, list=45%, signal=147%
KEGG_PPAR_SIGNALING_PATHWAY	36	-0.393033	-2.86262	0	0	0	2527	tags=81%, list=42%, signal=137%
KEGG_GLYCOLYSIS_GLUCONEOGENESIS	40	-0.355224	-2.66422	0	0.000574625	0.003	2419	tags=75%, list=40%, signal=124%
KEGG_PROTEASOME	38	-0.355692	-2.62495	0	0.000510778	0.003	3457	tags=92%, list=57%, signal=212%
KEGG_LYSOSOME	73	-0.253288	-2.57733	0	0.0004597	0.003	2898	tags=73%, list=48%, signal=137%
KEGG_VIRAL_MYOCARDITIS	24	-0.432179	-2.56576	0	0.000569857	0.004	2454	tags=83%, list=40%, signal=139%
KEGG_CITRATE_CYCLE_TCA_CYCLE	26	-0.394264	-2.47576	0	0.00149587	0.01	2997	tags=88%, list=49%, signal=173%
KEGG_PYRUVATE_METABOLISM	32	-0.372348	-2.45014	0.00205761	0.00149191	0.011	2693	tags=81%, list=44%, signal=145%
KEGG_FOCAL_ADHESION	107	-0.195752	-2.42863	0	0.00193825	0.016	3098	tags=70%, list=51%, signal=140%
KEGG_AMINO_SUGAR_AND_NUCLEOTIDE_SUGAR_METABOLISM	39	-0.313075	-2.3696	0	0.00305633	0.028	3103	tags=82%, list=51%, signal=166%
KEGG_COMPLEMENT_AND_COAGULATION_CASCADES	35	-0.331733	-2.3404	0	0.00393659	0.039	2168	tags=69%, list=36%, signal=106%
KEGG_ARRHYTHMOGENIC_RIGHT_VENTRICULAR_CARDIOMYOPATHY_ARVC	26	-0.371605	-2.2939	0.00385356	0.00563092	0.059	2666	tags=81%, list=44%, signal=143%
KEGG_DILATED_CARDIOMYOPATHY	30	-0.352566	-2.27694	0	0.00625522	0.07	2736	tags=80%, list=45%, signal=145%
KEGG_ARGININE_AND_PROLINE_METABOLISM	38	-0.304156	-2.20425	0.00401606	0.0095448	0.111	1846	tags=61%, list=30%, signal=86%
KEGG_ANTIGEN_PROCESSING_AND_PRESENTATION	23	-0.367229	-2.10035	0	0.0172938	0.198	1215	tags=57%, list=20%, signal=70%
KEGG_HYPERTROPHIC_CARDIOMYOPATHY_HCM	30	-0.319068	-2.09013	0	0.0180923	0.215	2736	tags=77%, list=45%, signal=139%
KEGG_PEROXISOME	40	-0.264907	-2.00525	0.00607287	0.0291865	0.33	3422	tags=83%, list=56%, signal=187%
KEGG_REGULATION_OF_ACTIN_CYTOSKELETON	107	-0.164786	-1.99504	0.00626305	0.02918	0.342	4649	tags=93%, list=76%, signal=384%
KEGG_ENDOMETRIAL_CANCER	27	-0.322959	-1.98231	0.00809717	0.0299123	0.358	1426	tags=56%, list=23%, signal=72%
KEGG_PENTOSE_PHOSPHATE_PATHWAY	20	-0.370498	-1.97743	0.00956023	0.0293115	0.364	3537	tags=95%, list=58%, signal=226%
KEGG_HEMATOPOIETIC_CELL_LINEAGE	13	-0.441941	-1.94549	0	0.0341789	0.423	2468	tags=85%, list=41%, signal=142%
KEGG_GALACTOSE_METABOLISM	18	-0.381797	-1.94043	0.00606061	0.033655	0.431	2419	tags=78%, list=40%, signal=129%
KEGG_GLUTATHIONE_METABOLISM	36	-0.251574	-1.81571	0.0136986	0.061577	0.672	1861	tags=56%, list=31%, signal=80%
KEGG_BUTANOATE_METABOLISM	26	-0.287722	-1.76746	0.0165289	0.0778077	0.768	2472	tags=69%, list=41%, signal=116%
KEGG_GLYCINE_SERINE_AND_THREONINE_METABOLISM	22	-0.314713	-1.7446	0.0283401	0.0847404	0.811	2520	tags=73%, list=41%, signal=124%
KEGG_TIGHT_JUNCTION	68	-0.17998	-1.71019	0.0308008	0.097469	0.86	3305	tags=72%, list=54%, signal=156%
KEGG_OOCYTE_MEIOSIS	45	-0.212424	-1.68809	0.0229446	0.104499	0.881	3453	tags=78%, list=57%, signal=178%
KEGG_CARDIAC_MUSCLE_CONTRACTION	30	-0.251136	-1.63444	0.0367347	0.131615	0.94	712	tags=37%, list=12%, signal=41%
KEGG_LEUKOCYTE_TRANSENDOTHELIAL_MIGRATION	52	-0.188922	-1.62419	0.0392157	0.134148	0.948	4364	tags=90%, list=72%, signal=316%
KEGG_NITROGEN_METABOLISM	15	-0.346636	-1.61369	0.0516899	0.136234	0.957	1143	tags=53%, list=19%, signal=65%
KEGG_STEROID_BIOSYNTHESIS	12	-0.392587	-1.60651	0.0427184	0.137139	0.958	2182	tags=75%, list=36%, signal=117%
KEGG_SYSTEMIC_LUPUS_ERYTHEMATOSUS	30	-0.246685	-1.59247	0.034413	0.14208	0.964	536	tags=33%, list=9%, signal=36%
KEGG_TERPENOID_BACKBONE_BIOSYNTHESIS	10	-0.412913	-1.56944	0.0363985	0.154947	0.974	2971	tags=90%, list=49%, signal=175%
KEGG_STARCH_AND_SUCROSE_METABOLISM	23	-0.256031	-1.49623	0.060166	0.210268	0.992	2419	tags=65%, list=40%, signal=108%
KEGG_AMYOTROPHIC_LATERAL_SCLEROSIS_ALS	22	-0.266112	-1.49146	0.0667976	0.210199	0.995	1431	tags=50%, list=24%, signal=65%
KEGG_CELL_ADHESION_MOLECULES_CAMS	29	-0.222311	-1.46668	0.0719844	0.228597	0.997	3483	tags=79%, list=57%, signal=184%
KEGG_INSULIN_SIGNALING_PATHWAY	76	-0.144811	-1.46103	0.0673077	0.228311	0.998	3697	tags=75%, list=61%, signal=189%
KEGG_FATTY_ACID_METABOLISM	31	-0.217723	-1.44602	0.0856574	0.238036	0.998	2414	tags=61%, list=40%, signal=101%
KEGG_ENDOCYTOSIS	99	-0.123846	-1.41438	0.0947776	0.265988	1	3380	tags=68%, list=56%, signal=150%
KEGG_SPLICEOSOME	109	-0.112137	-1.35004	0.136106	0.339477	1	3967	tags=76%, list=65%, signal=215%
KEGG_DRUG_METABOLISM_OTHER_ENZYMES	17	-0.276476	-1.33211	0.151923	0.357965	1	1904	tags=59%, list=31%, signal=85%
KEGG_VASCULAR_SMOOTH_MUSCLE_CONTRACTION	51	-0.155642	-1.33171	0.136842	0.351086	1	2643	tags=59%, list=43%, signal=103%
KEGG_ARACHIDONIC_ACID_METABOLISM	16	-0.278425	-1.31452	0.152688	0.367992	1	3638	tags=88%, list=60%, signal=217%
KEGG_VALINE_LEUCINE_AND_ISOLEUCINE_DEGRADATION	40	-0.173611	-1.3144	0.135189	0.360538	1	2452	tags=58%, list=40%, signal=96%
KEGG_PATHOGENIC_ESCHERICHIA_COLI_INFECTION	41	-0.170046	-1.30717	0.155945	0.363536	1	4319	tags=88%, list=71%, signal=300%
KEGG_GLYOXYLATE_AND_DICARBOXYLATE_METABOLISM	11	-0.326737	-1.29845	0.14751	0.367671	1	2997	tags=82%, list=49%, signal=161%
KEGG_OTHER_GLYCAN_DEGRADATION	12	-0.300738	-1.297	0.160784	0.36264	1	3755	tags=92%, list=62%, signal=239%
KEGG_VIBRIO_CHOLERAE_INFECTION	33	-0.183089	-1.28827	0.178431	0.367985	1	2398	tags=58%, list=39%, signal=94%
KEGG_PORPHYRIN_AND_CHLOROPHYLL_METABOLISM	19	-0.243952	-1.27909	0.159919	0.374342	1	1084	tags=42%, list=18%, signal=51%
KEGG_ADHERENS_JUNCTION	41	-0.164888	-1.24882	0.172619	0.412066	1	1974	tags=49%, list=32%, signal=72%
KEGG_PATHWAYS_IN_CANCER	113	-0.102524	-1.24335	0.194672	0.412815	1	3753	tags=72%, list=62%, signal=183%
KEGG_PROGESTERONE_MEDIATED_OOCYTE_MATURATION	35	-0.176804	-1.23339	0.224652	0.420735	1	2758	tags=63%, list=45%, signal=114%
KEGG_PROSTATE_CANCER	41	-0.160747	-1.23101	0.18664	0.416873	1	1405	tags=39%, list=23%, signal=50%
KEGG_METABOLISM_OF_XENOBIOTICS_BY_CYTOCHROME_P450	22	-0.2136	-1.21674	0.213849	0.432601	1	3687	tags=82%, list=61%, signal=207%
KEGG_CHEMOKINE_SIGNALING_PATHWAY	66	-0.128321	-1.20608	0.233684	0.442484	1	3841	tags=76%, list=63%, signal=203%
KEGG_FC_EPSILON_RI_SIGNALING_PATHWAY	35	-0.1704	-1.20296	0.230038	0.439882	1	1405	tags=40%, list=23%, signal=52%
KEGG_DRUG_METABOLISM_CYTOCHROME_P450	25	-0.196821	-1.19181	0.240326	0.450057	1	2948	tags=68%, list=48%, signal=131%
KEGG_THYROID_CANCER	12	-0.284776	-1.19072	0.235772	0.444942	1	3852	tags=92%, list=63%, signal=249%
KEGG_MELANOGENESIS	29	-0.18541	-1.18742	0.23	0.442353	1	1397	tags=41%, list=23%, signal=53%
KEGG_FRUCTOSE_AND_MANNOSE_METABOLISM	28	-0.188158	-1.17934	0.235867	0.449148	1	2340	tags=57%, list=38%, signal=92%
KEGG_TRYPTOPHAN_METABOLISM	21	-0.216609	-1.17596	0.263566	0.447356	1	2456	tags=62%, list=40%, signal=103%
KEGG_FC_GAMMA_R_MEDIATED_PHAGOCYTOSIS	55	-0.138006	-1.17149	0.259184	0.446735	1	1936	tags=45%, list=32%, signal=66%
KEGG_SNARE_INTERACTIONS_IN_VESICULAR_TRANSPORT	26	-0.19024	-1.15598	0.279749	0.463045	1	4234	tags=88%, list=70%, signal=289%
KEGG_BETA_ALANINE_METABOLISM	14	-0.247137	-1.13778	0.30695	0.485819	1	2414	tags=64%, list=40%, signal=106%
KEGG_NEUROTROPHIN_SIGNALING_PATHWAY	64	-0.118229	-1.1139	0.28827	0.517649	1	3570	tags=70%, list=59%, signal=168%
KEGG_LEISHMANIA_INFECTION	26	-0.17903	-1.10199	0.324649	0.52988	1	3131	tags=69%, list=51%, signal=142%
KEGG_GAP_JUNCTION	46	-0.137669	-1.09402	0.330116	0.536067	1	3802	tags=76%, list=62%, signal=201%
KEGG_NON_SMALL_CELL_LUNG_CANCER	28	-0.163027	-1.03353	0.380671	0.637796	1	1405	tags=39%, list=23%, signal=51%
KEGG_JAK_STAT_SIGNALING_PATHWAY	20	-0.190229	-1.02328	0.409274	0.649536	1	1891	tags=50%, list=31%, signal=72%
KEGG_BIOSYNTHESIS_OF_UNSATURATED_FATTY_ACIDS	11	-0.248422	-1.01189	0.406593	0.66259	1	3473	tags=82%, list=57%, signal=190%
KEGG_PURINE_METABOLISM	76	-0.0978166	-1.00667	0.435484	0.66451	1	4941	tags=91%, list=81%, signal=476%
KEGG_PROXIMAL_TUBULE_BICARBONATE_RECLAMATION	13	-0.23006	-1.00478	0.425197	0.65942	1	3287	tags=77%, list=54%, signal=167%
KEGG_PHENYLALANINE_METABOLISM	10	-0.255404	-0.992864	0.451866	0.673219	1	884	tags=40%, list=15%, signal=47%
KEGG_CYTOKINE_CYTOKINE_RECEPTOR_INTERACTION	10	-0.251357	-0.977702	0.461233	0.694717	1	4562	tags=100%, list=75%, signal=398%
KEGG_EPITHELIAL_CELL_SIGNALING_IN_HELICOBACTER_PYLORI_INFECTION	37	-0.135613	-0.973111	0.488764	0.695462	1	4611	tags=89%, list=76%, signal=365%
KEGG_PROPANOATE_METABOLISM	29	-0.149909	-0.96573	0.494888	0.701325	1	2452	tags=55%, list=40%, signal=92%
KEGG_CYSTEINE_AND_METHIONINE_METABOLISM	22	-0.169479	-0.965258	0.46	0.693463	1	4785	tags=95%, list=79%, signal=444%
KEGG_VEGF_SIGNALING_PATHWAY	35	-0.137368	-0.961113	0.476654	0.692236	1	1431	tags=37%, list=24%, signal=48%
KEGG_RETINOL_METABOLISM	10	-0.242425	-0.929891	0.530097	0.741883	1	354	tags=30%, list=6%, signal=32%
KEGG_N_GLYCAN_BIOSYNTHESIS	30	-0.141503	-0.918468	0.545627	0.755019	1	3000	tags=63%, list=49%, signal=124%
KEGG_NEUROACTIVE_LIGAND_RECEPTOR_INTERACTION	10	-0.235269	-0.918057	0.56797	0.746965	1	3442	tags=80%, list=57%, signal=184%
KEGG_GLIOMA	28	-0.142344	-0.917286	0.549708	0.739853	1	3705	tags=75%, list=61%, signal=191%
KEGG_PROTEIN_EXPORT	17	-0.180878	-0.909189	0.532258	0.746725	1	3559	tags=76%, list=58%, signal=184%
KEGG_CYTOSOLIC_DNA_SENSING_PATHWAY	18	-0.175507	-0.896859	0.567416	0.76071	1	1980	tags=50%, list=33%, signal=74%
KEGG_MAPK_SIGNALING_PATHWAY	86	-0.0829449	-0.884553	0.609808	0.77417	1	3114	tags=59%, list=51%, signal=120%
KEGG_ERBB_SIGNALING_PATHWAY	41	-0.116959	-0.881617	0.584362	0.77107	1	3749	tags=73%, list=62%, signal=189%
KEGG_GLYCEROPHOSPHOLIPID_METABOLISM	32	-0.128354	-0.876481	0.590818	0.771887	1	4932	tags=94%, list=81%, signal=491%
KEGG_WNT_SIGNALING_PATHWAY	50	-0.106481	-0.867099	0.616438	0.780531	1	1550	tags=36%, list=25%, signal=48%
KEGG_B_CELL_RECEPTOR_SIGNALING_PATHWAY	37	-0.117214	-0.864817	0.612326	0.776597	1	1431	tags=35%, list=24%, signal=46%
KEGG_SMALL_CELL_LUNG_CANCER	36	-0.119716	-0.842013	0.649485	0.807699	1	2490	tags=53%, list=41%, signal=89%
KEGG_P53_SIGNALING_PATHWAY	18	-0.15866	-0.834567	0.671937	0.812221	1	1744	tags=44%, list=29%, signal=62%
KEGG_GLYCEROLIPID_METABOLISM	26	-0.137702	-0.828704	0.71173	0.813361	1	2679	tags=58%, list=44%, signal=103%
KEGG_LONG_TERM_POTENTIATION	33	-0.119611	-0.819307	0.700205	0.821288	1	3705	tags=73%, list=61%, signal=185%
KEGG_ONE_CARBON_POOL_BY_FOLATE	14	-0.17505	-0.802376	0.705882	0.841102	1	2417	tags=57%, list=40%, signal=95%
KEGG_NUCLEOTIDE_EXCISION_REPAIR	24	-0.135449	-0.79136	0.725564	0.850507	1	2224	tags=50%, list=37%, signal=78%
KEGG_HISTIDINE_METABOLISM	16	-0.159734	-0.786206	0.719057	0.85053	1	2456	tags=56%, list=40%, signal=94%
KEGG_GNRH_SIGNALING_PATHWAY	41	-0.103384	-0.77162	0.736111	0.864772	1	2643	tags=54%, list=43%, signal=94%
KEGG_RENAL_CELL_CARCINOMA	34	-0.112046	-0.763745	0.744	0.868488	1	218	tags=15%, list=4%, signal=15%
KEGG_ALANINE_ASPARTATE_AND_GLUTAMATE_METABOLISM	25	-0.12622	-0.758425	0.776892	0.868087	1	2889	tags=60%, list=47%, signal=114%
KEGG_NATURAL_KILLER_CELL_MEDIATED_CYTOTOXICITY	35	-0.108632	-0.757498	0.750487	0.861054	1	1431	tags=34%, list=24%, signal=45%
KEGG_ADIPOCYTOKINE_SIGNALING_PATHWAY	30	-0.117231	-0.755542	0.786469	0.855904	1	3553	tags=70%, list=58%, signal=167%
KEGG_ACUTE_MYELOID_LEUKEMIA	26	-0.124348	-0.750614	0.787755	0.854694	1	1589	tags=38%, list=26%, signal=52%
KEGG_DNA_REPLICATION	21	-0.135645	-0.737224	0.780127	0.864991	1	4687	tags=90%, list=77%, signal=392%
KEGG_MELANOMA	22	-0.130078	-0.714645	0.840336	0.887702	1	1426	tags=36%, list=23%, signal=47%
KEGG_RIG_I_LIKE_RECEPTOR_SIGNALING_PATHWAY	33	-0.0953274	-0.659591	0.871227	0.943826	1	3114	tags=61%, list=51%, signal=123%
KEGG_TOLL_LIKE_RECEPTOR_SIGNALING_PATHWAY	39	-0.0838271	-0.630708	0.912698	0.965109	1	899	tags=23%, list=15%, signal=27%
KEGG_T_CELL_RECEPTOR_SIGNALING_PATHWAY	44	-0.0750132	-0.583928	0.962891	0.994005	1	5083	tags=91%, list=83%, signal=546%
KEGG_NICOTINATE_AND_NICOTINAMIDE_METABOLISM	10	-0.144497	-0.559648	0.975191	1	1	2776	tags=60%, list=46%, signal=110%
KEGG_NOD_LIKE_RECEPTOR_SIGNALING_PATHWAY	25	-0.0935489	-0.558319	0.965517	0.99201	1	2600	tags=52%, list=43%, signal=90%
KEGG_SPHINGOLIPID_METABOLISM	15	-0.1171	-0.545397	0.976285	0.989816	1	3755	tags=73%, list=62%, signal=191%
KEGG_PRION_DISEASES	22	-0.0936662	-0.526805	0.981851	0.988828	1	2754	tags=55%, list=45%, signal=99%
KEGG_BASE_EXCISION_REPAIR	17	-0.0918972	-0.451826	0.998004	0.996553	1	5532	tags=100%, list=91%, signal=1090%
KEGG_BASAL_TRANSCRIPTION_FACTORS	14	0.461399	2.06611	0.00397614	0.0969165	0.196	3285	tags=100%, list=54%, signal=217%
KEGG_UBIQUITIN_MEDIATED_PROTEOLYSIS	66	0.203296	1.95432	0.00785855	0.100618	0.369	4310	tags=91%, list=71%, signal=308%
KEGG_REGULATION_OF_AUTOPHAGY	11	0.353241	1.42074	0.102713	1	1	3941	tags=100%, list=65%, signal=283%
KEGG_PHOSPHATIDYLINOSITOL_SIGNALING_SYSTEM	42	0.184263	1.39611	0.115914	0.890566	1	3524	tags=76%, list=58%, signal=180%
KEGG_PYRIMIDINE_METABOLISM	45	0.174895	1.38264	0.135802	0.752058	1	4625	tags=93%, list=76%, signal=385%
KEGG_RNA_DEGRADATION	43	0.178057	1.35122	0.121212	0.710013	1	3029	tags=67%, list=50%, signal=133%
KEGG_AXON_GUIDANCE	49	0.152277	1.25096	0.194	0.885851	1	3180	tags=67%, list=52%, signal=140%
KEGG_RNA_POLYMERASE	13	0.282461	1.24141	0.184549	0.802846	1	3435	tags=85%, list=56%, signal=194%
KEGG_GLYCOSYLPHOSPHATIDYLINOSITOL_GPI_ANCHOR_BIOSYNTHESIS	14	0.268219	1.22293	0.228395	0.763475	1	1849	tags=57%, list=30%, signal=82%
KEGG_RIBOFLAVIN_METABOLISM	10	0.311762	1.18301	0.255446	0.78768	1	2975	tags=80%, list=49%, signal=156%
KEGG_SELENOAMINO_ACID_METABOLISM	18	0.225599	1.16123	0.258893	0.769745	1	3027	tags=72%, list=50%, signal=143%
KEGG_LYSINE_DEGRADATION	22	0.193828	1.12594	0.28	0.794103	1	1314	tags=41%, list=22%, signal=52%
KEGG_AMINOACYL_TRNA_BIOSYNTHESIS	38	0.158508	1.12411	0.299401	0.737648	1	482	tags=24%, list=8%, signal=26%
KEGG_TGF_BETA_SIGNALING_PATHWAY	22	0.200751	1.09839	0.352031	0.743989	1	1272	tags=41%, list=21%, signal=52%
KEGG_INOSITOL_PHOSPHATE_METABOLISM	33	0.159426	1.09227	0.312871	0.707754	1	4938	tags=97%, list=81%, signal=510%
KEGG_TYPE_II_DIABETES_MELLITUS	22	0.184313	1.04061	0.395062	0.777457	1	4693	tags=95%, list=77%, signal=415%
KEGG_STEROID_HORMONE_BIOSYNTHESIS	10	0.270489	1.0345	0.392544	0.744983	1	2617	tags=70%, list=43%, signal=123%
KEGG_CELL_CYCLE	45	0.130245	1.03207	0.395085	0.708259	1	4083	tags=80%, list=67%, signal=241%
KEGG_COLORECTAL_CANCER	28	0.152403	0.957054	0.460922	0.830449	1	815	tags=29%, list=13%, signal=33%
KEGG_CALCIUM_SIGNALING_PATHWAY	43	0.120672	0.938101	0.507843	0.830086	1	4792	tags=91%, list=79%, signal=423%
KEGG_NOTCH_SIGNALING_PATHWAY	15	0.185984	0.866877	0.582846	0.94165	1	899	tags=33%, list=15%, signal=39%
KEGG_PANCREATIC_CANCER	32	0.123736	0.8323	0.678988	0.970145	1	3626	tags=72%, list=60%, signal=177%
KEGG_MTOR_SIGNALING_PATHWAY	26	0.133749	0.797969	0.705882	0.995237	1	1530	tags=38%, list=25%, signal=51%
KEGG_ABC_TRANSPORTERS	15	0.166678	0.785704	0.719397	0.976758	1	2640	tags=60%, list=43%, signal=106%
KEGG_BLADDER_CANCER	13	0.177774	0.773873	0.746183	0.958802	1	324	tags=23%, list=5%, signal=24%
KEGG_CHRONIC_MYELOID_LEUKEMIA	36	0.105577	0.737026	0.793173	0.981584	1	3081	tags=61%, list=51%, signal=123%
KEGG_MISMATCH_REPAIR	13	0.169368	0.730359	0.800407	0.956363	1	2717	tags=62%, list=45%, signal=111%
KEGG_ALDOSTERONE_REGULATED_SODIUM_REABSORPTION	19	0.12955	0.660645	0.854291	1	1	815	tags=26%, list=13%, signal=30%
KEGG_LONG_TERM_DEPRESSION	35	0.0899995	0.626007	0.919075	1	1	324	tags=14%, list=5%, signal=15%
KEGG_APOPTOSIS	42	0.0825321	0.625525	0.909278	0.982747	1	5154	tags=93%, list=85%, signal=601%
KEGG_TYROSINE_METABOLISM	14	0.140576	0.622478	0.920543	0.953797	1	5234	tags=100%, list=86%, signal=711%
KEGG_VASOPRESSIN_REGULATED_WATER_REABSORPTION	29	0.093735	0.596786	0.935743	0.943621	1	5310	tags=97%, list=87%, signal=751%

## Sheet: G12D vs WT Protein
Timestamp	1516984016614
NAME	SIZE	ES	NES	NOM p-val	FDR q-val	FWER p-val	RANK AT MAX	LEADING EDGE
KEGG_RIBOSOME	78	-0.606314	-6.12453	0	0	0	1899	tags=91%, list=31%, signal=131%
KEGG_OXIDATIVE_PHOSPHORYLATION	89	-0.525225	-5.85588	0	0	0	1844	tags=82%, list=30%, signal=116%
KEGG_PARKINSONS_DISEASE	87	-0.497535	-5.34816	0	0	0	1844	tags=79%, list=30%, signal=112%
KEGG_ALZHEIMERS_DISEASE	102	-0.364252	-4.36608	0	0	0	2775	tags=81%, list=46%, signal=147%
KEGG_CITRATE_CYCLE_TCA_CYCLE	26	-0.648822	-3.96814	0	0	0	1922	tags=96%, list=32%, signal=140%
KEGG_HUNTINGTONS_DISEASE	112	-0.320749	-3.88454	0	0	0	2705	tags=76%, list=44%, signal=134%
KEGG_VALINE_LEUCINE_AND_ISOLEUCINE_DEGRADATION	40	-0.462919	-3.46726	0	0	0	2072	tags=80%, list=34%, signal=120%
KEGG_GLYCOLYSIS_GLUCONEOGENESIS	40	-0.42576	-3.17742	0	0	0	2449	tags=83%, list=40%, signal=137%
KEGG_ARGININE_AND_PROLINE_METABOLISM	38	-0.424332	-3.10539	0	0	0	1920	tags=74%, list=32%, signal=107%
KEGG_PROTEASOME	38	-0.413329	-3.06729	0	0	0	2948	tags=89%, list=48%, signal=172%
KEGG_PYRUVATE_METABOLISM	32	-0.439285	-2.96476	0	0	0	1907	tags=75%, list=31%, signal=109%
KEGG_PROPANOATE_METABOLISM	29	-0.420502	-2.70781	0	0.000450205	0.005	2072	tags=76%, list=34%, signal=114%
KEGG_GLYCINE_SERINE_AND_THREONINE_METABOLISM	22	-0.48584	-2.68846	0	0.000415574	0.005	1205	tags=68%, list=20%, signal=85%
KEGG_PENTOSE_PHOSPHATE_PATHWAY	20	-0.477855	-2.62707	0	0.00046589	0.006	2581	tags=90%, list=42%, signal=156%
KEGG_CARDIAC_MUSCLE_CONTRACTION	30	-0.39517	-2.55784	0	0.000690208	0.009	1666	tags=67%, list=27%, signal=91%
KEGG_GALACTOSE_METABOLISM	18	-0.488296	-2.52733	0	0.000793157	0.011	2449	tags=89%, list=40%, signal=148%
KEGG_PROTEIN_EXPORT	17	-0.501395	-2.47088	0	0.00127139	0.019	1971	tags=82%, list=32%, signal=121%
KEGG_N_GLYCAN_BIOSYNTHESIS	30	-0.351598	-2.361	0.00194553	0.00246362	0.039	1930	tags=67%, list=32%, signal=97%
KEGG_NITROGEN_METABOLISM	15	-0.496773	-2.32363	0	0.00323645	0.052	637	tags=60%, list=10%, signal=67%
KEGG_ALANINE_ASPARTATE_AND_GLUTAMATE_METABOLISM	25	-0.388846	-2.31645	0.00204918	0.00307463	0.052	1540	tags=64%, list=25%, signal=85%
KEGG_AMINOACYL_TRNA_BIOSYNTHESIS	38	-0.303904	-2.22082	0	0.00634807	0.109	2168	tags=66%, list=36%, signal=102%
KEGG_GLYOXYLATE_AND_DICARBOXYLATE_METABOLISM	11	-0.5315	-2.18652	0	0.00707309	0.127	2306	tags=91%, list=38%, signal=146%
KEGG_FATTY_ACID_METABOLISM	31	-0.320536	-2.12857	0	0.00934761	0.175	2184	tags=68%, list=36%, signal=105%
KEGG_STEROID_BIOSYNTHESIS	12	-0.504484	-2.11629	0	0.00956755	0.184	1502	tags=75%, list=25%, signal=99%
KEGG_BETA_ALANINE_METABOLISM	14	-0.45846	-2.09892	0.00197628	0.0103674	0.201	2435	tags=86%, list=40%, signal=143%
KEGG_GLYCEROLIPID_METABOLISM	26	-0.314271	-1.9216	0.0040568	0.0266187	0.449	3482	tags=88%, list=57%, signal=206%
KEGG_INSULIN_SIGNALING_PATHWAY	76	-0.185655	-1.8977	0.00793651	0.0300566	0.507	3852	tags=82%, list=63%, signal=219%
KEGG_SNARE_INTERACTIONS_IN_VESICULAR_TRANSPORT	26	-0.300746	-1.85215	0.0120724	0.0378643	0.597	3564	tags=88%, list=59%, signal=212%
KEGG_AMINO_SUGAR_AND_NUCLEOTIDE_SUGAR_METABOLISM	39	-0.243628	-1.79464	0.022	0.0491477	0.714	2118	tags=59%, list=35%, signal=90%
KEGG_TRYPTOPHAN_METABOLISM	21	-0.327675	-1.79378	0.0258449	0.0478316	0.716	2072	tags=67%, list=34%, signal=101%
KEGG_VIBRIO_CHOLERAE_INFECTION	33	-0.262104	-1.79252	0.0246914	0.0466402	0.72	2104	tags=61%, list=35%, signal=92%
KEGG_AMYOTROPHIC_LATERAL_SCLEROSIS_ALS	22	-0.317717	-1.78085	0.012024	0.0479966	0.746	2225	tags=68%, list=37%, signal=107%
KEGG_FRUCTOSE_AND_MANNOSE_METABOLISM	28	-0.277812	-1.77754	0.013834	0.0477837	0.758	2449	tags=68%, list=40%, signal=113%
KEGG_PROXIMAL_TUBULE_BICARBONATE_RECLAMATION	13	-0.385856	-1.71092	0.037037	0.0639802	0.862	1872	tags=69%, list=31%, signal=100%
KEGG_GLUTATHIONE_METABOLISM	36	-0.232594	-1.69632	0.0302419	0.0667182	0.883	3329	tags=78%, list=55%, signal=171%
KEGG_ERBB_SIGNALING_PATHWAY	41	-0.221375	-1.65791	0.0329218	0.0791729	0.925	3266	tags=76%, list=54%, signal=162%
KEGG_MTOR_SIGNALING_PATHWAY	26	-0.268026	-1.60335	0.0491159	0.0999904	0.96	3294	tags=81%, list=54%, signal=175%
KEGG_PPAR_SIGNALING_PATHWAY	36	-0.218606	-1.57688	0.0532319	0.110153	0.979	1384	tags=44%, list=23%, signal=57%
KEGG_PORPHYRIN_AND_CHLOROPHYLL_METABOLISM	19	-0.302506	-1.57438	0.0625	0.108575	0.982	1690	tags=58%, list=28%, signal=80%
KEGG_ONE_CARBON_POOL_BY_FOLATE	14	-0.340306	-1.49985	0.0930693	0.149323	0.998	1848	tags=64%, list=30%, signal=92%
KEGG_LYSOSOME	73	-0.148403	-1.49103	0.0766208	0.151496	1	2111	tags=49%, list=35%, signal=75%
KEGG_ENDOMETRIAL_CANCER	27	-0.236947	-1.47305	0.0872211	0.158835	1	3075	tags=74%, list=51%, signal=149%
KEGG_SELENOAMINO_ACID_METABOLISM	18	-0.287981	-1.46885	0.0766129	0.158097	1	2312	tags=67%, list=38%, signal=107%
KEGG_BUTANOATE_METABOLISM	26	-0.237817	-1.44682	0.068	0.170141	1	2072	tags=58%, list=34%, signal=87%
KEGG_CYSTEINE_AND_METHIONINE_METABOLISM	22	-0.257758	-1.41375	0.0970874	0.190646	1	2312	tags=64%, list=38%, signal=102%
KEGG_THYROID_CANCER	12	-0.328945	-1.36018	0.110638	0.232551	1	4091	tags=100%, list=67%, signal=304%
KEGG_PYRIMIDINE_METABOLISM	45	-0.157523	-1.26934	0.193966	0.321862	1	4732	tags=93%, list=78%, signal=416%
KEGG_PEROXISOME	40	-0.165002	-1.24617	0.205128	0.342956	1	4483	tags=90%, list=74%, signal=339%
KEGG_RIBOFLAVIN_METABOLISM	10	-0.318638	-1.24556	0.216867	0.336754	1	4153	tags=100%, list=68%, signal=314%
KEGG_TERPENOID_BACKBONE_BIOSYNTHESIS	10	-0.317733	-1.20324	0.186373	0.384879	1	1114	tags=50%, list=18%, signal=61%
KEGG_NICOTINATE_AND_NICOTINAMIDE_METABOLISM	10	-0.313374	-1.20188	0.234343	0.379234	1	4185	tags=100%, list=69%, signal=319%
KEGG_WNT_SIGNALING_PATHWAY	50	-0.145491	-1.19611	0.236	0.379494	1	2654	tags=58%, list=44%, signal=102%
KEGG_LYSINE_DEGRADATION	22	-0.206078	-1.16625	0.253608	0.413967	1	2072	tags=55%, list=34%, signal=82%
KEGG_TYROSINE_METABOLISM	14	-0.257472	-1.16446	0.269151	0.408878	1	3656	tags=86%, list=60%, signal=214%
KEGG_VIRAL_MYOCARDITIS	24	-0.203236	-1.1558	0.279468	0.412383	1	2574	tags=63%, list=42%, signal=108%
KEGG_GNRH_SIGNALING_PATHWAY	41	-0.148947	-1.11807	0.28252	0.458714	1	3110	tags=66%, list=51%, signal=134%
KEGG_SPHINGOLIPID_METABOLISM	15	-0.234135	-1.09623	0.332673	0.484282	1	3856	tags=87%, list=63%, signal=236%
KEGG_RNA_DEGRADATION	43	-0.133773	-1.05269	0.376984	0.543759	1	4998	tags=95%, list=82%, signal=528%
KEGG_OTHER_GLYCAN_DEGRADATION	12	-0.250974	-1.04054	0.392116	0.553613	1	3550	tags=83%, list=58%, signal=199%
KEGG_VASOPRESSIN_REGULATED_WATER_REABSORPTION	29	-0.159924	-1.03157	0.410931	0.559748	1	4281	tags=86%, list=70%, signal=289%
KEGG_PROSTATE_CANCER	41	-0.130892	-1.00475	0.439163	0.5937	1	843	tags=27%, list=14%, signal=31%
KEGG_NEUROACTIVE_LIGAND_RECEPTOR_INTERACTION	10	-0.251933	-0.956907	0.485944	0.666607	1	1514	tags=50%, list=25%, signal=66%
KEGG_NEUROTROPHIN_SIGNALING_PATHWAY	64	-0.105329	-0.953408	0.508841	0.661837	1	3838	tags=73%, list=63%, signal=197%
KEGG_MELANOGENESIS	29	-0.145271	-0.927755	0.529528	0.696291	1	3110	tags=66%, list=51%, signal=133%
KEGG_HISTIDINE_METABOLISM	16	-0.18892	-0.926151	0.544148	0.688199	1	3801	tags=81%, list=62%, signal=216%
KEGG_ENDOCYTOSIS	99	-0.0805383	-0.925646	0.528846	0.678615	1	4685	tags=85%, list=77%, signal=362%
KEGG_TIGHT_JUNCTION	68	-0.0955479	-0.917389	0.55	0.682937	1	4082	tags=76%, list=67%, signal=229%
KEGG_ADIPOCYTOKINE_SIGNALING_PATHWAY	30	-0.135204	-0.885797	0.590998	0.727935	1	4053	tags=80%, list=67%, signal=238%
KEGG_GLIOMA	28	-0.143016	-0.875795	0.602105	0.734589	1	3266	tags=68%, list=54%, signal=146%
KEGG_PHENYLALANINE_METABOLISM	10	-0.22938	-0.865453	0.611222	0.741821	1	2260	tags=60%, list=37%, signal=95%
KEGG_GLYCEROPHOSPHOLIPID_METABOLISM	32	-0.121904	-0.822882	0.697341	0.803741	1	1546	tags=38%, list=25%, signal=50%
KEGG_RENAL_CELL_CARCINOMA	34	-0.115845	-0.807329	0.693069	0.818586	1	195	tags=15%, list=3%, signal=15%
KEGG_FC_EPSILON_RI_SIGNALING_PATHWAY	35	-0.111638	-0.806708	0.698745	0.808321	1	195	tags=14%, list=3%, signal=15%
KEGG_OOCYTE_MEIOSIS	45	-0.0971468	-0.778914	0.758985	0.842683	1	2526	tags=51%, list=41%, signal=87%
KEGG_MELANOMA	22	-0.131996	-0.761611	0.745455	0.856762	1	3075	tags=64%, list=51%, signal=128%
KEGG_COLORECTAL_CANCER	28	-0.119658	-0.742719	0.786408	0.87417	1	798	tags=25%, list=13%, signal=29%
KEGG_VASCULAR_SMOOTH_MUSCLE_CONTRACTION	51	-0.0861439	-0.737791	0.824197	0.869715	1	436	tags=16%, list=7%, signal=17%
KEGG_EPITHELIAL_CELL_SIGNALING_IN_HELICOBACTER_PYLORI_INFECTION	37	-0.100186	-0.731785	0.817444	0.866285	1	3838	tags=73%, list=63%, signal=196%
KEGG_DRUG_METABOLISM_OTHER_ENZYMES	17	-0.147301	-0.723214	0.790323	0.866292	1	1972	tags=47%, list=32%, signal=69%
KEGG_GLYCOSYLPHOSPHATIDYLINOSITOL_GPI_ANCHOR_BIOSYNTHESIS	14	-0.149312	-0.670167	0.869023	0.920754	1	4748	tags=93%, list=78%, signal=421%
KEGG_NON_SMALL_CELL_LUNG_CANCER	28	-0.107137	-0.66359	0.880626	0.916776	1	3266	tags=64%, list=54%, signal=138%
KEGG_BIOSYNTHESIS_OF_UNSATURATED_FATTY_ACIDS	11	-0.144126	-0.578949	0.944231	0.979955	1	5214	tags=100%, list=86%, signal=695%
KEGG_ANTIGEN_PROCESSING_AND_PRESENTATION	23	-0.0957081	-0.547769	0.978448	0.984682	1	3921	tags=74%, list=64%, signal=207%
KEGG_BLADDER_CANCER	13	-0.110776	-0.488412	0.995918	0.991523	1	3075	tags=62%, list=51%, signal=124%
KEGG_COMPLEMENT_AND_COAGULATION_CASCADES	35	0.621606	4.38561	0	0	0	1107	tags=80%, list=18%, signal=97%
KEGG_SYSTEMIC_LUPUS_ERYTHEMATOSUS	30	0.386951	2.57087	0	0.00213246	0.005	496	tags=47%, list=8%, signal=51%
KEGG_BASAL_TRANSCRIPTION_FACTORS	14	0.534345	2.40634	0	0.0063607	0.022	1972	tags=86%, list=32%, signal=126%
KEGG_REGULATION_OF_ACTIN_CYTOSKELETON	107	0.191751	2.3016	0	0.0113523	0.051	3689	tags=79%, list=61%, signal=198%
KEGG_LEISHMANIA_INFECTION	26	0.367456	2.24682	0.00210526	0.0138668	0.075	1284	tags=58%, list=21%, signal=73%
KEGG_SPLICEOSOME	109	0.181229	2.18369	0.00202429	0.0197447	0.125	3887	tags=82%, list=64%, signal=222%
KEGG_AXON_GUIDANCE	49	0.244682	2.01914	0	0.0431633	0.288	3616	tags=84%, list=59%, signal=204%
KEGG_CELL_CYCLE	45	0.249456	1.98624	0.00770713	0.0458253	0.338	2280	tags=62%, list=37%, signal=99%
KEGG_CELL_ADHESION_MOLECULES_CAMS	29	0.305207	1.94576	0.00616016	0.052051	0.409	879	tags=45%, list=14%, signal=52%
KEGG_PRION_DISEASES	22	0.328656	1.80002	0.0194932	0.10546	0.705	496	tags=41%, list=8%, signal=44%
KEGG_DNA_REPLICATION	21	0.321931	1.75579	0.016	0.120632	0.785	1235	tags=52%, list=20%, signal=65%
KEGG_FC_GAMMA_R_MEDIATED_PHAGOCYTOSIS	55	0.19881	1.73472	0.0196464	0.124702	0.826	3892	tags=84%, list=64%, signal=230%
KEGG_PHOSPHATIDYLINOSITOL_SIGNALING_SYSTEM	42	0.215857	1.64244	0.0303644	0.180349	0.94	3043	tags=71%, list=50%, signal=142%
KEGG_LEUKOCYTE_TRANSENDOTHELIAL_MIGRATION	52	0.18119	1.55952	0.0513347	0.249224	0.987	3589	tags=77%, list=59%, signal=186%
KEGG_P53_SIGNALING_PATHWAY	18	0.297397	1.5537	0.0445736	0.239361	0.987	1238	tags=50%, list=20%, signal=63%
KEGG_HEMATOPOIETIC_CELL_LINEAGE	13	0.35989	1.54438	0.0744467	0.234589	0.987	1091	tags=54%, list=18%, signal=65%
KEGG_ECM_RECEPTOR_INTERACTION	44	0.193274	1.49608	0.0888469	0.274395	0.997	1460	tags=43%, list=24%, signal=56%
KEGG_PATHOGENIC_ESCHERICHIA_COLI_INFECTION	41	0.191206	1.45261	0.0957031	0.313397	0.998	3892	tags=83%, list=64%, signal=228%
KEGG_TGF_BETA_SIGNALING_PATHWAY	22	0.256964	1.44386	0.0736196	0.3084	0.998	4529	tags=100%, list=74%, signal=389%
KEGG_CYTOSOLIC_DNA_SENSING_PATHWAY	18	0.283936	1.4355	0.0965795	0.302912	1	1658	tags=56%, list=27%, signal=76%
KEGG_NOTCH_SIGNALING_PATHWAY	15	0.305137	1.41789	0.106667	0.312098	1	1799	tags=60%, list=30%, signal=85%
KEGG_RNA_POLYMERASE	13	0.311035	1.3617	0.111111	0.371162	1	2793	tags=77%, list=46%, signal=142%
KEGG_ABC_TRANSPORTERS	15	0.292613	1.35704	0.129293	0.36099	1	2281	tags=67%, list=37%, signal=106%
KEGG_CYTOKINE_CYTOKINE_RECEPTOR_INTERACTION	10	0.349301	1.34655	0.122244	0.360463	1	1529	tags=60%, list=25%, signal=80%
KEGG_BASE_EXCISION_REPAIR	17	0.269153	1.30386	0.166337	0.409237	1	3021	tags=76%, list=50%, signal=151%
KEGG_ARACHIDONIC_ACID_METABOLISM	16	0.27011	1.29354	0.179541	0.408357	1	642	tags=38%, list=11%, signal=42%
KEGG_PANCREATIC_CANCER	32	0.193712	1.28361	0.167355	0.408774	1	3773	tags=81%, list=62%, signal=212%
KEGG_B_CELL_RECEPTOR_SIGNALING_PATHWAY	37	0.173581	1.2622	0.175542	0.427575	1	1417	tags=41%, list=23%, signal=53%
KEGG_HYPERTROPHIC_CARDIOMYOPATHY_HCM	30	0.189311	1.25107	0.183432	0.429692	1	4738	tags=97%, list=78%, signal=434%
KEGG_MISMATCH_REPAIR	13	0.27351	1.17361	0.286822	0.551179	1	3021	tags=77%, list=50%, signal=152%
KEGG_CHEMOKINE_SIGNALING_PATHWAY	66	0.120973	1.15738	0.281376	0.563354	1	3791	tags=74%, list=62%, signal=195%
KEGG_UBIQUITIN_MEDIATED_PROTEOLYSIS	66	0.122815	1.13906	0.284024	0.580516	1	4887	tags=92%, list=80%, signal=463%
KEGG_ARRHYTHMOGENIC_RIGHT_VENTRICULAR_CARDIOMYOPATHY_ARVC	26	0.184036	1.13528	0.296593	0.570156	1	4738	tags=96%, list=78%, signal=432%
KEGG_NATURAL_KILLER_CELL_MEDIATED_CYTOTOXICITY	35	0.158837	1.11405	0.334615	0.593211	1	1473	tags=40%, list=24%, signal=52%
KEGG_PATHWAYS_IN_CANCER	113	0.0891027	1.1048	0.340164	0.593249	1	2053	tags=42%, list=34%, signal=63%
KEGG_TYPE_II_DIABETES_MELLITUS	22	0.197132	1.0732	0.355159	0.638729	1	4892	tags=100%, list=80%, signal=507%
KEGG_ADHERENS_JUNCTION	41	0.140204	1.06132	0.374494	0.644749	1	4646	tags=90%, list=76%, signal=378%
KEGG_REGULATION_OF_AUTOPHAGY	11	0.270648	1.05231	0.405512	0.645572	1	4443	tags=100%, list=73%, signal=369%
KEGG_DILATED_CARDIOMYOPATHY	30	0.155812	1.00191	0.426386	0.728833	1	4738	tags=93%, list=78%, signal=419%
KEGG_CHRONIC_MYELOID_LEUKEMIA	36	0.140812	1.0015	0.422222	0.711448	1	3206	tags=67%, list=53%, signal=140%
KEGG_NUCLEOTIDE_EXCISION_REPAIR	24	0.175605	0.995671	0.440079	0.70487	1	3247	tags=71%, list=53%, signal=151%
KEGG_SMALL_CELL_LUNG_CANCER	36	0.138219	0.981959	0.483101	0.715036	1	2376	tags=53%, list=39%, signal=86%
KEGG_DRUG_METABOLISM_CYTOCHROME_P450	25	0.164565	0.961469	0.468208	0.737723	1	706	tags=28%, list=12%, signal=32%
KEGG_NOD_LIKE_RECEPTOR_SIGNALING_PATHWAY	25	0.156807	0.954249	0.487078	0.735524	1	4650	tags=92%, list=76%, signal=388%
KEGG_CALCIUM_SIGNALING_PATHWAY	43	0.122195	0.945319	0.52621	0.736439	1	5066	tags=95%, list=83%, signal=564%
KEGG_STEROID_HORMONE_BIOSYNTHESIS	10	0.245468	0.944432	0.505703	0.722085	1	3378	tags=80%, list=55%, signal=179%
KEGG_JAK_STAT_SIGNALING_PATHWAY	20	0.17699	0.93731	0.508439	0.719849	1	1056	tags=35%, list=17%, signal=42%
KEGG_INOSITOL_PHOSPHATE_METABOLISM	33	0.137189	0.937249	0.528376	0.704905	1	3043	tags=64%, list=50%, signal=127%
KEGG_GAP_JUNCTION	46	0.120434	0.93721	0.50503	0.690558	1	4566	tags=87%, list=75%, signal=345%
KEGG_PURINE_METABOLISM	76	0.0898142	0.931336	0.53816	0.687145	1	4907	tags=89%, list=81%, signal=455%
KEGG_STARCH_AND_SUCROSE_METABOLISM	23	0.160897	0.927073	0.527668	0.681661	1	5112	tags=100%, list=84%, signal=621%
KEGG_T_CELL_RECEPTOR_SIGNALING_PATHWAY	44	0.119359	0.917342	0.554672	0.685521	1	4121	tags=80%, list=68%, signal=244%
KEGG_METABOLISM_OF_XENOBIOTICS_BY_CYTOCHROME_P450	22	0.159657	0.905739	0.550308	0.692251	1	691	tags=27%, list=11%, signal=31%
KEGG_RIG_I_LIKE_RECEPTOR_SIGNALING_PATHWAY	33	0.131015	0.900274	0.581053	0.688092	1	4372	tags=85%, list=72%, signal=299%
KEGG_APOPTOSIS	42	0.118839	0.895408	0.556225	0.683909	1	1600	tags=38%, list=26%, signal=51%
KEGG_RETINOL_METABOLISM	10	0.234841	0.887389	0.574297	0.684149	1	1007	tags=40%, list=17%, signal=48%
KEGG_MAPK_SIGNALING_PATHWAY	86	0.0814535	0.881634	0.6	0.681458	1	4537	tags=83%, list=75%, signal=319%
KEGG_FOCAL_ADHESION	107	0.073015	0.866469	0.617537	0.692457	1	4570	tags=82%, list=75%, signal=324%
KEGG_ALDOSTERONE_REGULATED_SODIUM_REABSORPTION	19	0.166201	0.855102	0.641434	0.698298	1	913	tags=32%, list=15%, signal=37%
KEGG_LONG_TERM_DEPRESSION	35	0.114408	0.803091	0.728346	0.76699	1	1568	tags=37%, list=26%, signal=50%
KEGG_TOLL_LIKE_RECEPTOR_SIGNALING_PATHWAY	39	0.106349	0.793077	0.729045	0.769236	1	1073	tags=28%, list=18%, signal=34%
KEGG_PROGESTERONE_MEDIATED_OOCYTE_MATURATION	35	0.108802	0.752577	0.768145	0.815549	1	1254	tags=31%, list=21%, signal=39%
KEGG_ACUTE_MYELOID_LEUKEMIA	26	0.119635	0.737473	0.818565	0.823421	1	913	tags=27%, list=15%, signal=32%
KEGG_VEGF_SIGNALING_PATHWAY	35	0.0924442	0.645179	0.895833	0.918755	1	1527	tags=34%, list=25%, signal=45%
KEGG_LONG_TERM_POTENTIATION	33	0.0733007	0.493387	0.994152	0.990137	1	4537	tags=82%, list=75%, signal=319%

## Sheet: A146T vs WT Scaled Phospho
Timestamp	1516984192039
NAME	SIZE	ES	NES	NOM p-val	FDR q-val	FWER p-val	RANK AT MAX	LEADING EDGE
CDK2	45	-0.233258	-1.86446	0.0131332	0.0389064	0.047	2190	tags=76%, list=53%, signal=157%
ERK2	42	-0.157775	-1.23098	0.214286	0.409104	0.673	3024	tags=88%, list=73%, signal=317%
PAK1	10	-0.275895	-1.0829	0.358416	0.452436	0.846	3024	tags=100%, list=73%, signal=363%
AKT1	12	-0.185541	-0.779302	0.742972	0.751365	0.99	2010	tags=67%, list=48%, signal=128%
CK2A1	50	0.307071	2.5172	0	0.001	0.001	1403	tags=64%, list=34%, signal=95%
PKACA	44	0.201913	1.57783	0.0570866	0.145199	0.217	1346	tags=52%, list=32%, signal=76%
CDK1	40	0.180229	1.33779	0.130178	0.265704	0.497	2487	tags=78%, list=60%, signal=190%
MTOR	17	0.227138	1.14359	0.293542	0.428652	0.787	1509	tags=59%, list=36%, signal=92%
ERK1	25	0.169638	1.01071	0.420842	0.519573	0.908	3133	tags=92%, list=75%, signal=367%
P38A	10	0.22634	0.87699	0.633333	0.61188	0.977	2394	tags=80%, list=57%, signal=187%

## Sheet: G12D vs WT Scaled Phospho
Timestamp	1516984211968
NAME	SIZE	ES	NES	NOM p-val	FDR q-val	FWER p-val	RANK AT MAX	LEADING EDGE
CDK2	45	-0.112285	-0.872075	0.615234	1	0.965	2133	tags=62%, list=51%, signal=126%
AKT1	12	-0.126212	-0.539125	0.967347	0.9746	1	1214	tags=42%, list=29%, signal=59%
CK2A1	50	0.252152	2.10668	0.0040568	0.021431	0.013	1963	tags=72%, list=47%, signal=134%
P38A	10	0.333069	1.26661	0.198459	0.725893	0.609	2367	tags=90%, list=57%, signal=208%
PKACA	44	0.146612	1.12992	0.272908	0.777377	0.792	2143	tags=66%, list=51%, signal=134%
CDK1	40	0.139954	1.06562	0.385185	0.722778	0.863	2132	tags=65%, list=51%, signal=132%
ERK1	25	0.166503	0.972672	0.466258	0.758481	0.929	3146	tags=92%, list=75%, signal=372%
MTOR	17	0.158614	0.778075	0.718053	0.985753	0.991	2039	tags=65%, list=49%, signal=126%
PAK1	10	0.199399	0.77579	0.732777	0.849187	0.991	2089	tags=70%, list=50%, signal=140%
ERK2	42	0.0655238	0.497949	0.988024	0.990464	0.999	225	tags=12%, list=5%, signal=12%

## Sheet: Complement and Coag. Cascades
AccID	Gene	A146T:WT	G12D:WT
P14106	C1qb	0	3.41315
Q8CG14	C1sa	0	2.54044
P98086	C1qa	-0.180431	2.42911
Q8CG16	C1ra	0.078361	2.21937
Q02105	C1qc	0.085514	2.0782
Q8BH35	C8b	0	2.09971
P01029	C4b	-0.730853	2.16236
P01027	C3	-0.760944	1.66354
P97290	Serping1	-0.442761	1.87654
Q8K0E8	Fgb	-0.416281	1.77892
P20918	Plg	-0.213337	1.60894
Q61129	Cfi	-0.232842	1.69878
Q8BH61	F13a1	-0.217999	1.84644
P08607	C4bpa	-0.114713	1.79429
D3YXF5	C7	0	1.85985
P04186	Cfb	0	1.84651
Q8K182	C8a	0	1.77244
P06684	C5	0.013719	1.76579
O88947	F10	-0.017437	1.64481
P16294	F9	0	1.52285
P06683	C9	0	1.49424
E9Q6D8	C6	0	1.35539
Q8VCG4	C8g	0	1.06179
P33587	Proc	-0.244915	1.02794
P06909	Cfh	-0.467818	1.17516
Q61247	Serpinf2	-0.700188	1.11535
Q8VCM7	Fgg	-1.11431	1.16048
O08677	Kng1	-0.933828	0.989816
E9PV24	Fga	-1.12294	0
Q61838	A2m	-0.763071	0
P19221	F2	-0.495415	0
P32261	Serpinc1	-0.469632	0
P26262	Klkb1	0.020475	0

## Sheet: Basal Transcription Factors
AccID	Gene	A146T:WT	G12D:WT
Q6NZA9	Taf9b	1.19734	1.06245
Q62311	Taf6	0.890291	0.982547
P62915	Gtf2b	0.727715	0.978392
Q3THK3	Gtf2f1	0.748024	1.06148
E9QAP7	Taf4a	0.747611	1.24867
Q8R2K4	Taf6l	0.63749	1.09831
Q9ESZ8	Gtf2i	0.615614	1.04796
Q9D902	Gtf2e2	0.553821	1.17578
Q9DBA9	Gtf2h1	0.333553	1.07655
P29037	Tbp	0.455908	0.953036
Q8C092	Taf5	0.726729	0.700271
Q9D0D5	Gtf2e1	0.245107	0.706611
Q8R0A0	Gtf2f2	0.228073	0

## Sheet: Nitrogen Metabolism
AccID	Gene	A146T:WT	G12D:WT
P13634	Ca1	-0.679879	-1.30665
Q8VCN5	Cth	-0.264728	-1.47239
P28651	Ca8	-0.286885	-0.931872
Q64444	Ca4	0	-0.918011
Q9QZA0	Ca5b	0	-0.865249
Q8CFA2	Amt	0	-0.687173
P35492	Hal	-0.709352	0
P15105	Glul	-1.55959	0
P00920	Ca2	-1.40848	-0.669494
P16015	Ca3	-1.32705	-1.07055

## Sheet: Cdk2
AccID	Gene	A146T:WT	G12D:WT
P25425_271	Pou2f1_271	0	-1.6375
Q91VL8_200	Terf2ip_200	-1.1591	-1.4953
P13405_367	Rb1_367	-1.32169	-1.33939
Q8VC03_882	Eml3_882	-1.36303	-1.23954
P13405_350	Rb1_350	-1.21026	-0.853744
Q80YV2_394	Zc3hc1_394	-1.12715	-0.795495
Q62376_226	Snrnp70_226	-1.21234	-0.391514
O35144_367	Terf2_367	-0.932942	-0.437159
Q9JI44_446	Dmap1_446	-0.865291	-0.549316
P97310_139	Mcm2_139	-0.892838	-0.74286
Q52KI8_810	Srrm1_810	-0.925893	-1.1517
Q8BGT6_628	Micall1_628	-0.87332	-1.11801
Q9D4J7_155	Phf6_155	-0.473951	-1.13715
Q569Z6_870	Thrap3_870	-0.59751	-0.985444
Q99NB9_142	Sf3b1_142	-0.584689	-0.974558
Q925J9_1217	Med1_1217	-0.440117	-0.801385
Q99NB9_426	Sf3b1_426	-0.576063	-0.782459
P26645_143	Marcks_143	-0.601292	-0.714422
P54227_38	Stmn1_38	-0.583939	-0.692384
P08775_1884	Polr2a_1884	-0.643899	-0.606254
P26645_124	Marcks_124	-0.590262	-0.378434
Q6ZQ58_751	Larp1_751	-0.47409	-0.370642
P54227_25	Stmn1_25	-0.476131	-0.484491
P25206_719	Mcm3_719	-0.42421	-0.563805
Q99NB9_211	Sf3b1_211	-0.424507	-0.631109
Q99NB9_434	Sf3b1_434	0	-0.688003
P37913_51	Lig1_51	0	-0.419991
O55201_664	Supt5h_664	0	-0.373859
P97386_211	Lig3_211	-0.442976	0
O35737_104	Hnrnph1_104	-0.455364	0
P62908_220	Rps3_220	-0.484894	0
P62908_221	Rps3_221	-0.518394	0
Q60953_528	Pml_528	-0.561486	0
Q99NH0_2401	Ankrd17_2401	-0.603092	0
D3YZP9_237	Ccdc6_237	-0.656068	0
P20152_56	Vim_56	-0.762518	0
Q61937_70	Npm1_70	-1.0424	0

## Sheet: Pkaca
AccID	Gene	A146T:WT	G12D:WT
Q8CGN5_222	Plin1_222	0.795214	2.24335
P07901_263	Hsp90aa1_263	0.833366	0.834519
Q02248_552	Ctnnb1_552	0.664085	0.870225
Q8BG32_14	Psmd11_14	0.723626	0.799007
A2ALS5_499	Rap1gap_499	0.686034	0.748925
P70227_934	Itpr3_934	0.712706	0.601691
P16331_16	Pah_16	1.27357	0.61071
P05480_17	Src_17	1.14825	0.239776
Q9WVA4_163	Tagln2_163	1.06039	0.136435
B2RQC6_1406	Cad_1406	0.989441	0.031818
P11679_24	Krt8_24	0.434725	-0.408358
E9Q616_136	Ahnak_136	0.319994	-0.23606
P14602_86	Hspb1_86	0	-0.220408
P54227_63	Stmn1_63	0	-0.265909
P35601_244	Rfc1_244	0	-0.267186
P54227_16	Stmn1_16	0	-0.353324
Q6R891_100	Ppp1r9b_100	0	-0.403047
Q8BTM8_2152	Flna_2152	-0.144027	-0.39049
P70227_1832	Itpr3_1832	-0.14033	-0.368136
P20357_1783	Map2_1783	-0.175788	-0.108891
P35564_582	Canx_582	-0.166173	-0.081952
Q9WTQ5_613	Akap12_613	-0.07081	0
P05132_339	Prkaca_339	-0.058714	-0.011242
B2RQC6_1859	Cad_1859	-0.0015	0
Q04735_110	Cdk16_110	0	-0.047648
Q922J3_311	Clip1_311	0.190133	-0.111779
O70251_106	Eef1b_106	0.154406	-0.001273
Q9QXS1_4649	Plec_4649	0	0.324964
P05064_46	Aldoa_46	-0.186106	0.386155
Q61233_5	Lcp1_5	0	0.545743

[truncated: 1 more sheets: Ck2a1]
