# Supplementary material for: Tissue-Specific Oncogenic Activity of KRASA146T
Source: Oxford University Press journal article supplement (doi:10.1158/2159-8290.cd-18-1220), 2019-04-05
Supplement: 21598290cd181220-sup-210474_2_supp_5431444_pp59my.xlsx [file 21598290cd181220-sup-210474_2_supp_5431444_pp59my.xlsx]

## Sheet: Parameters
Table S13: GSEA analysis of spleens expressing WT or mutant K-Ras.
Parameter
scoring_scheme	classic
norm	meandiv
makes_sets	true
set_max	500
rnd_seed	timestamp
set_min	10
nperm	1000

## Sheet: A146T vs WT Protein
Timestamp	1527179570188
NAME	SIZE	ES	NES	NOM p-val	FDR q-val	FWER p-val	RANK AT MAX	LEADING EDGE
KEGG_ECM_RECEPTOR_INTERACTION	50	-0.429894	-3.53035	0	0	0	1251	tags=60%, list=17%, signal=72%
KEGG_HEMATOPOIETIC_CELL_LINEAGE	38	-0.486395	-3.4833	0	0	0	1068	tags=63%, list=15%, signal=74%
KEGG_FOCAL_ADHESION	128	-0.244033	-3.19783	0	0	0	2840	tags=63%, list=39%, signal=102%
KEGG_SPLICEOSOME	115	-0.260194	-3.17218	0	0	0	4369	tags=86%, list=60%, signal=214%
KEGG_REGULATION_OF_ACTIN_CYTOSKELETON	133	-0.236813	-3.16974	0	0	0	3155	tags=67%, list=44%, signal=117%
KEGG_PRIMARY_IMMUNODEFICIENCY	20	-0.580089	-3.05131	0	0	0	2323	tags=90%, list=32%, signal=132%
KEGG_VALINE_LEUCINE_AND_ISOLEUCINE_DEGRADATION	41	-0.406109	-2.97108	0	0	0	3426	tags=88%, list=47%, signal=166%
KEGG_ARRHYTHMOGENIC_RIGHT_VENTRICULAR_CARDIOMYOPATHY_ARVC	30	-0.436123	-2.86257	0	0	0	2642	tags=80%, list=37%, signal=126%
KEGG_TIGHT_JUNCTION	64	-0.302241	-2.83531	0	0.000145405	0.001	2577	tags=66%, list=36%, signal=101%
KEGG_VASCULAR_SMOOTH_MUSCLE_CONTRACTION	60	-0.293689	-2.65957	0	0.000284487	0.002	2953	tags=70%, list=41%, signal=117%
KEGG_COMPLEMENT_AND_COAGULATION_CASCADES	46	-0.316193	-2.56423	0	0.00088324	0.006	2442	tags=65%, list=34%, signal=98%
KEGG_DILATED_CARDIOMYOPATHY	36	-0.342958	-2.45179	0	0.00177631	0.013	2953	tags=75%, list=41%, signal=126%
KEGG_AXON_GUIDANCE	52	-0.282711	-2.39397	0	0.00266189	0.023	3946	tags=83%, list=55%, signal=181%
KEGG_TRYPTOPHAN_METABOLISM	25	-0.392953	-2.32689	0	0.00420557	0.039	1795	tags=64%, list=25%, signal=85%
KEGG_B_CELL_RECEPTOR_SIGNALING_PATHWAY	59	-0.249711	-2.26435	0.00186916	0.00658334	0.065	3231	tags=69%, list=45%, signal=125%
KEGG_PROPANOATE_METABOLISM	25	-0.377791	-2.26292	0	0.00617188	0.065	2193	tags=68%, list=30%, signal=97%
KEGG_CITRATE_CYCLE_TCA_CYCLE	25	-0.369804	-2.19765	0.00194553	0.00869821	0.095	3406	tags=84%, list=47%, signal=158%
KEGG_LEUKOCYTE_TRANSENDOTHELIAL_MIGRATION	69	-0.223729	-2.18832	0.00411523	0.00866145	0.1	3006	tags=64%, list=42%, signal=108%
KEGG_BETA_ALANINE_METABOLISM	14	-0.483134	-2.18799	0	0.00820559	0.1	2193	tags=79%, list=30%, signal=113%
KEGG_ARGININE_AND_PROLINE_METABOLISM	33	-0.326286	-2.18589	0.00609756	0.00807496	0.104	2470	tags=67%, list=34%, signal=101%
KEGG_T_CELL_RECEPTOR_SIGNALING_PATHWAY	66	-0.22889	-2.16877	0	0.00897961	0.121	3506	tags=71%, list=49%, signal=137%
KEGG_BUTANOATE_METABOLISM	22	-0.38548	-2.12397	0	0.0113536	0.16	3791	tags=91%, list=52%, signal=191%
KEGG_CALCIUM_SIGNALING_PATHWAY	54	-0.242012	-2.10108	0.00208333	0.0124629	0.182	2011	tags=52%, list=28%, signal=71%
KEGG_FRUCTOSE_AND_MANNOSE_METABOLISM	28	-0.335756	-2.09218	0.00205761	0.0126026	0.192	3260	tags=79%, list=45%, signal=143%
KEGG_PARKINSONS_DISEASE	92	-0.186045	-2.06832	0.00210526	0.0139877	0.222	5033	tags=88%, list=70%, signal=287%
KEGG_PATHOGENIC_ESCHERICHIA_COLI_INFECTION	39	-0.27473	-2.06215	0.00775194	0.014081	0.231	3583	tags=77%, list=50%, signal=152%
KEGG_RNA_DEGRADATION	51	-0.243281	-2.05991	0	0.0137174	0.234	4912	tags=92%, list=68%, signal=286%
KEGG_ADHERENS_JUNCTION	49	-0.246574	-2.04789	0.0083682	0.0140324	0.246	4570	tags=88%, list=63%, signal=237%
KEGG_HUNTINGTONS_DISEASE	121	-0.158407	-2.00745	0.00391389	0.0178543	0.31	4606	tags=79%, list=64%, signal=215%
KEGG_PYRUVATE_METABOLISM	30	-0.314405	-2.00471	0.0020202	0.0176883	0.316	2073	tags=60%, list=29%, signal=84%
KEGG_ALZHEIMERS_DISEASE	108	-0.160802	-1.96793	0.00808081	0.0214301	0.379	5076	tags=86%, list=70%, signal=285%
KEGG_FATTY_ACID_METABOLISM	30	-0.301224	-1.95436	0.00403226	0.0224534	0.406	2890	tags=70%, list=40%, signal=116%
KEGG_PHOSPHATIDYLINOSITOL_SIGNALING_SYSTEM	46	-0.242754	-1.94897	0.00808081	0.0225352	0.417	3126	tags=67%, list=43%, signal=118%
KEGG_GLUTATHIONE_METABOLISM	35	-0.273669	-1.91004	0.00607287	0.0269551	0.476	2161	tags=57%, list=30%, signal=81%
KEGG_DRUG_METABOLISM_CYTOCHROME_P450	22	-0.341452	-1.90898	0.00793651	0.0262613	0.476	497	tags=41%, list=7%, signal=44%
KEGG_AMINO_SUGAR_AND_NUCLEOTIDE_SUGAR_METABOLISM	37	-0.262871	-1.90222	0.00619835	0.0264557	0.49	2992	tags=68%, list=41%, signal=115%
KEGG_METABOLISM_OF_XENOBIOTICS_BY_CYTOCHROME_P450	20	-0.35754	-1.89238	0.00617284	0.0271214	0.51	1037	tags=50%, list=14%, signal=58%
KEGG_LONG_TERM_POTENTIATION	37	-0.263804	-1.889	0.00404858	0.0271211	0.518	4742	tags=92%, list=66%, signal=266%
KEGG_CELL_ADHESION_MOLECULES_CAMS	42	-0.235887	-1.85374	0.0117647	0.0321653	0.594	3122	tags=67%, list=43%, signal=117%
KEGG_GALACTOSE_METABOLISM	20	-0.347723	-1.8324	0.0117188	0.0356662	0.643	2191	tags=65%, list=30%, signal=93%
KEGG_HYPERTROPHIC_CARDIOMYOPATHY_HCM	35	-0.264163	-1.82694	0.0100604	0.0359131	0.651	2642	tags=63%, list=37%, signal=99%
KEGG_LONG_TERM_DEPRESSION	33	-0.262354	-1.80514	0.00970874	0.0398005	0.688	3805	tags=79%, list=53%, signal=166%
KEGG_CHEMOKINE_SIGNALING_PATHWAY	90	-0.165934	-1.80374	0.0180361	0.0392799	0.692	3231	tags=61%, list=45%, signal=109%
KEGG_GLYCOLYSIS_GLUCONEOGENESIS	39	-0.243684	-1.78829	0.021692	0.0418648	0.729	3806	tags=77%, list=53%, signal=162%
KEGG_ALANINE_ASPARTATE_AND_GLUTAMATE_METABOLISM	21	-0.325742	-1.76752	0.0202429	0.0455586	0.763	2470	tags=67%, list=34%, signal=101%
KEGG_GAP_JUNCTION	49	-0.219792	-1.76444	0.0161943	0.0453054	0.771	3583	tags=71%, list=50%, signal=141%
KEGG_ARACHIDONIC_ACID_METABOLISM	18	-0.34595	-1.76284	0.0121951	0.0447692	0.772	1521	tags=56%, list=21%, signal=70%
KEGG_APOPTOSIS	54	-0.197777	-1.73545	0.0295858	0.0507488	0.809	3398	tags=67%, list=47%, signal=125%
KEGG_SMALL_CELL_LUNG_CANCER	51	-0.203018	-1.73061	0.0203666	0.0508359	0.818	2935	tags=61%, list=41%, signal=102%
KEGG_PHENYLALANINE_METABOLISM	11	-0.433542	-1.70768	0.0214425	0.0554052	0.847	814	tags=55%, list=11%, signal=61%
KEGG_MAPK_SIGNALING_PATHWAY	117	-0.12876	-1.66097	0.0350515	0.069153	0.916	4765	tags=79%, list=66%, signal=227%
KEGG_WNT_SIGNALING_PATHWAY	62	-0.177356	-1.63809	0.031746	0.0754812	0.934	3274	tags=63%, list=45%, signal=114%
KEGG_ANTIGEN_PROCESSING_AND_PRESENTATION	32	-0.241177	-1.6213	0.0364683	0.0802539	0.95	2555	tags=59%, list=35%, signal=91%
KEGG_TYROSINE_METABOLISM	17	-0.323166	-1.59829	0.045082	0.0884901	0.966	1496	tags=53%, list=21%, signal=67%
KEGG_VIBRIO_CHOLERAE_INFECTION	30	-0.242862	-1.57525	0.0449898	0.0965844	0.977	3069	tags=67%, list=42%, signal=115%
KEGG_MELANOGENESIS	30	-0.244549	-1.55474	0.0524194	0.104343	0.987	4742	tags=90%, list=66%, signal=261%
KEGG_INOSITOL_PHOSPHATE_METABOLISM	37	-0.215874	-1.52584	0.0608519	0.117066	0.998	4696	tags=86%, list=65%, signal=246%
KEGG_TERPENOID_BACKBONE_BIOSYNTHESIS	11	-0.377189	-1.50415	0.0693642	0.127326	0.999	3190	tags=82%, list=44%, signal=146%
KEGG_CARDIAC_MUSCLE_CONTRACTION	36	-0.200908	-1.45092	0.107724	0.158255	1	4375	tags=81%, list=61%, signal=203%
KEGG_NICOTINATE_AND_NICOTINAMIDE_METABOLISM	15	-0.308691	-1.43824	0.0851064	0.164396	1	1628	tags=53%, list=23%, signal=69%
KEGG_FC_GAMMA_R_MEDIATED_PHAGOCYTOSIS	71	-0.147494	-1.43621	0.092	0.163058	1	3015	tags=56%, list=42%, signal=96%
KEGG_ALDOSTERONE_REGULATED_SODIUM_REABSORPTION	20	-0.265412	-1.42852	0.117063	0.165837	1	3506	tags=75%, list=49%, signal=145%
KEGG_CYSTEINE_AND_METHIONINE_METABOLISM	22	-0.252639	-1.42301	0.106061	0.166543	1	1793	tags=50%, list=25%, signal=66%
KEGG_PENTOSE_PHOSPHATE_PATHWAY	20	-0.261108	-1.42288	0.097561	0.164025	1	3537	tags=75%, list=49%, signal=147%
KEGG_NEUROTROPHIN_SIGNALING_PATHWAY	77	-0.137204	-1.40244	0.102669	0.175147	1	4742	tags=79%, list=66%, signal=228%
KEGG_GLYCEROLIPID_METABOLISM	25	-0.236032	-1.3858	0.119675	0.18488	1	3791	tags=76%, list=52%, signal=159%
KEGG_VIRAL_MYOCARDITIS	33	-0.205963	-1.3809	0.117188	0.185851	1	3335	tags=67%, list=46%, signal=123%
KEGG_PROXIMAL_TUBULE_BICARBONATE_RECLAMATION	12	-0.315742	-1.33529	0.146998	0.219975	1	3141	tags=75%, list=43%, signal=133%
KEGG_FC_EPSILON_RI_SIGNALING_PATHWAY	46	-0.164576	-1.33269	0.147177	0.218708	1	3844	tags=70%, list=53%, signal=148%
KEGG_GLYCINE_SERINE_AND_THREONINE_METABOLISM	17	-0.259256	-1.30223	0.16	0.24303	1	682	tags=35%, list=9%, signal=39%
KEGG_OXIDATIVE_PHOSPHORYLATION	88	-0.119361	-1.29964	0.172131	0.241751	1	5797	tags=92%, list=80%, signal=461%
KEGG_NATURAL_KILLER_CELL_MEDIATED_CYTOTOXICITY	60	-0.139044	-1.28786	0.162218	0.248958	1	3218	tags=58%, list=45%, signal=104%
KEGG_PATHWAYS_IN_CANCER	157	-0.0866242	-1.26581	0.176349	0.265968	1	4817	tags=75%, list=67%, signal=221%
KEGG_VEGF_SIGNALING_PATHWAY	42	-0.166136	-1.25816	0.159236	0.269573	1	2935	tags=57%, list=41%, signal=96%
KEGG_VASOPRESSIN_REGULATED_WATER_REABSORPTION	24	-0.215083	-1.25149	0.194444	0.272478	1	5073	tags=92%, list=70%, signal=307%
KEGG_ENDOCYTOSIS	112	-0.10228	-1.2506	0.172147	0.269663	1	5722	tags=89%, list=79%, signal=423%
KEGG_PROTEASOME	40	-0.166082	-1.22323	0.205645	0.294013	1	5308	tags=90%, list=73%, signal=338%
KEGG_RENAL_CELL_CARCINOMA	43	-0.15843	-1.20596	0.220307	0.309105	1	4742	tags=81%, list=66%, signal=236%
KEGG_BASAL_TRANSCRIPTION_FACTORS	26	-0.189924	-1.14971	0.271368	0.369303	1	5023	tags=88%, list=70%, signal=289%
KEGG_GNRH_SIGNALING_PATHWAY	42	-0.151161	-1.14257	0.299228	0.373509	1	4934	tags=83%, list=68%, signal=262%
KEGG_N_GLYCAN_BIOSYNTHESIS	25	-0.195304	-1.12127	0.314233	0.396677	1	4373	tags=80%, list=61%, signal=202%
KEGG_PROSTATE_CANCER	50	-0.135616	-1.11171	0.296154	0.404211	1	3506	tags=62%, list=49%, signal=120%
KEGG_RENIN_ANGIOTENSIN_SYSTEM	10	-0.290544	-1.10628	0.358025	0.406828	1	2961	tags=70%, list=41%, signal=118%
KEGG_HEDGEHOG_SIGNALING_PATHWAY	11	-0.269777	-1.09184	0.356436	0.422062	1	3308	tags=73%, list=46%, signal=134%
KEGG_NOD_LIKE_RECEPTOR_SIGNALING_PATHWAY	34	-0.15174	-1.0668	0.360721	0.451709	1	4433	tags=76%, list=61%, signal=197%
KEGG_JAK_STAT_SIGNALING_PATHWAY	43	-0.135288	-1.0566	0.372973	0.460048	1	5412	tags=88%, list=75%, signal=351%
KEGG_ENDOMETRIAL_CANCER	34	-0.150455	-1.0472	0.407867	0.467776	1	3805	tags=68%, list=53%, signal=142%
KEGG_EPITHELIAL_CELL_SIGNALING_IN_HELICOBACTER_PYLORI_INFECTION	40	-0.139857	-1.03284	0.399586	0.481893	1	6038	tags=98%, list=84%, signal=591%
KEGG_GLYCEROPHOSPHOLIPID_METABOLISM	34	-0.15111	-1.03193	0.411985	0.477847	1	5712	tags=94%, list=79%, signal=448%
KEGG_OTHER_GLYCAN_DEGRADATION	13	-0.242581	-1.03075	0.410853	0.474249	1	2141	tags=54%, list=30%, signal=76%
KEGG_LYSOSOME	93	-0.0896701	-1.0244	0.418033	0.477471	1	4720	tags=74%, list=65%, signal=211%
KEGG_LYSINE_DEGRADATION	29	-0.159988	-1.01858	0.447059	0.480555	1	4578	tags=79%, list=63%, signal=216%
KEGG_HISTIDINE_METABOLISM	15	-0.206901	-0.998693	0.441955	0.502825	1	3806	tags=73%, list=53%, signal=155%
KEGG_GLYOXYLATE_AND_DICARBOXYLATE_METABOLISM	11	-0.233583	-0.959714	0.475728	0.55222	1	3569	tags=73%, list=49%, signal=144%
KEGG_CYTOKINE_CYTOKINE_RECEPTOR_INTERACTION	36	-0.131196	-0.939359	0.537374	0.57648	1	2268	tags=44%, list=31%, signal=64%
KEGG_RIBOFLAVIN_METABOLISM	10	-0.243622	-0.931922	0.538307	0.581468	1	5466	tags=100%, list=76%, signal=411%
KEGG_PROTEIN_EXPORT	17	-0.189615	-0.929591	0.548708	0.578522	1	5432	tags=94%, list=75%, signal=379%
KEGG_PPAR_SIGNALING_PATHWAY	36	-0.126983	-0.910006	0.566191	0.601819	1	894	tags=25%, list=12%, signal=28%
KEGG_ETHER_LIPID_METABOLISM	12	-0.215488	-0.898775	0.577075	0.613123	1	3262	tags=67%, list=45%, signal=121%
KEGG_SELENOAMINO_ACID_METABOLISM	17	-0.153807	-0.746972	0.756487	0.829999	1	5690	tags=94%, list=79%, signal=443%
KEGG_ACUTE_MYELOID_LEUKEMIA	40	-0.0988235	-0.732042	0.79922	0.842676	1	3805	tags=63%, list=53%, signal=131%
KEGG_NEUROACTIVE_LIGAND_RECEPTOR_INTERACTION	19	-0.139335	-0.722698	0.780075	0.846528	1	1278	tags=32%, list=18%, signal=38%
KEGG_BIOSYNTHESIS_OF_UNSATURATED_FATTY_ACIDS	12	-0.165511	-0.699561	0.840551	0.86707	1	4826	tags=83%, list=67%, signal=251%
KEGG_TGF_BETA_SIGNALING_PATHWAY	35	-0.0979626	-0.68483	0.867173	0.876703	1	535	tags=17%, list=7%, signal=18%
KEGG_GLYCOSAMINOGLYCAN_DEGRADATION	12	-0.150786	-0.643411	0.908907	0.911803	1	1923	tags=42%, list=27%, signal=57%
KEGG_ADIPOCYTOKINE_SIGNALING_PATHWAY	35	-0.0744479	-0.529143	0.990329	0.980492	1	704	tags=17%, list=10%, signal=19%
KEGG_DNA_REPLICATION	37	0.576633	4.10181	0	0	0	1126	tags=73%, list=16%, signal=86%
KEGG_RIBOSOME	79	0.39675	4.05165	0	0	0	3290	tags=85%, list=46%, signal=154%
KEGG_CELL_CYCLE	80	0.34658	3.5837	0	0	0	1225	tags=51%, list=17%, signal=61%
KEGG_MISMATCH_REPAIR	22	0.483043	2.70197	0	0.000448	0.003	2430	tags=82%, list=34%, signal=123%
KEGG_NUCLEOTIDE_EXCISION_REPAIR	36	0.333132	2.40118	0	0.00320239	0.027	2821	tags=72%, list=39%, signal=118%
KEGG_SNARE_INTERACTIONS_IN_VESICULAR_TRANSPORT	29	0.353663	2.26691	0	0.00723327	0.07	3930	tags=90%, list=54%, signal=196%
KEGG_P53_SIGNALING_PATHWAY	27	0.361398	2.24674	0	0.00695014	0.078	876	tags=48%, list=12%, signal=55%
KEGG_PYRIMIDINE_METABOLISM	70	0.21423	2.11521	0	0.0134629	0.164	2181	tags=51%, list=30%, signal=73%
KEGG_PORPHYRIN_AND_CHLOROPHYLL_METABOLISM	19	0.376502	2.00008	0.00399202	0.0258539	0.322	708	tags=47%, list=10%, signal=52%
KEGG_ABC_TRANSPORTERS	18	0.32482	1.65914	0.0261044	0.154662	0.921	1270	tags=50%, list=18%, signal=61%
KEGG_RETINOL_METABOLISM	10	0.403716	1.58057	0.0414938	0.206666	0.977	2865	tags=80%, list=40%, signal=132%
KEGG_HOMOLOGOUS_RECOMBINATION	15	0.330743	1.56489	0.0501931	0.204142	0.983	2430	tags=67%, list=34%, signal=100%
KEGG_UBIQUITIN_MEDIATED_PROTEOLYSIS	86	0.145753	1.55706	0.0398323	0.194554	0.987	5845	tags=95%, list=81%, signal=494%
KEGG_SYSTEMIC_LUPUS_ERYTHEMATOSUS	37	0.210642	1.50561	0.0764463	0.225713	0.993	1023	tags=35%, list=14%, signal=41%
KEGG_ERBB_SIGNALING_PATHWAY	48	0.169524	1.41093	0.0793651	0.314057	0.999	5403	tags=92%, list=75%, signal=362%
KEGG_BASE_EXCISION_REPAIR	25	0.233836	1.38077	0.117172	0.332999	1	916	tags=36%, list=13%, signal=41%
KEGG_BLADDER_CANCER	19	0.252928	1.31131	0.159223	0.417051	1	1218	tags=42%, list=17%, signal=51%
KEGG_CHRONIC_MYELOID_LEUKEMIA	51	0.151856	1.30518	0.14611	0.40387	1	5424	tags=90%, list=75%, signal=360%
KEGG_MTOR_SIGNALING_PATHWAY	33	0.186973	1.27116	0.188259	0.434659	1	5658	tags=97%, list=78%, signal=446%
KEGG_PURINE_METABOLISM	102	0.101418	1.20029	0.238569	0.535037	1	1047	tags=25%, list=14%, signal=28%
KEGG_LEISHMANIA_INFECTION	30	0.180636	1.18441	0.247984	0.537454	1	3996	tags=73%, list=55%, signal=163%
KEGG_PRION_DISEASES	22	0.202109	1.15388	0.26839	0.570432	1	4781	tags=86%, list=66%, signal=255%
KEGG_NOTCH_SIGNALING_PATHWAY	17	0.235466	1.15294	0.275449	0.547071	1	4250	tags=82%, list=59%, signal=200%
KEGG_PEROXISOME	47	0.138074	1.12679	0.309717	0.570466	1	5923	tags=96%, list=82%, signal=529%
KEGG_AMYOTROPHIC_LATERAL_SCLEROSIS_ALS	28	0.175523	1.12532	0.312127	0.55038	1	3379	tags=64%, list=47%, signal=120%
KEGG_PANCREATIC_CANCER	47	0.132176	1.09211	0.34902	0.590299	1	5658	tags=91%, list=78%, signal=420%
KEGG_REGULATION_OF_AUTOPHAGY	12	0.261859	1.08406	0.332061	0.581909	1	5333	tags=100%, list=74%, signal=382%
KEGG_OOCYTE_MEIOSIS	61	0.11472	1.05895	0.375494	0.605892	1	835	tags=23%, list=12%, signal=26%
KEGG_TOLL_LIKE_RECEPTOR_SIGNALING_PATHWAY	52	0.12114	1.03221	0.406639	0.635008	1	5658	tags=90%, list=78%, signal=414%
KEGG_DORSO_VENTRAL_AXIS_FORMATION	10	0.27396	1.02811	0.382178	0.621092	1	912	tags=40%, list=13%, signal=46%
KEGG_ONE_CARBON_POOL_BY_FOLATE	12	0.228618	0.984066	0.480159	0.681492	1	758	tags=33%, list=10%, signal=37%
KEGG_DRUG_METABOLISM_OTHER_ENZYMES	20	0.175521	0.960228	0.482979	0.705129	1	2707	tags=55%, list=37%, signal=88%
KEGG_NON_SMALL_CELL_LUNG_CANCER	36	0.133755	0.938853	0.516129	0.723451	1	5658	tags=92%, list=78%, signal=421%
KEGG_PROGESTERONE_MEDIATED_OOCYTE_MATURATION	49	0.110531	0.910499	0.543825	0.753688	1	5986	tags=94%, list=83%, signal=545%
KEGG_INSULIN_SIGNALING_PATHWAY	81	0.0824745	0.884802	0.605691	0.779224	1	4938	tags=77%, list=68%, signal=239%
KEGG_MELANOMA	29	0.135999	0.86832	0.61657	0.787038	1	764	tags=24%, list=11%, signal=27%
KEGG_AMINOACYL_TRNA_BIOSYNTHESIS	39	0.110632	0.821297	0.677485	0.847993	1	4019	tags=67%, list=56%, signal=150%
KEGG_SPHINGOLIPID_METABOLISM	19	0.153679	0.812664	0.700193	0.840081	1	2313	tags=47%, list=32%, signal=70%
KEGG_COLORECTAL_CANCER	43	0.102573	0.796556	0.715385	0.846148	1	5141	tags=81%, list=71%, signal=281%
KEGG_TYPE_II_DIABETES_MELLITUS	20	0.149236	0.78317	0.727455	0.846201	1	5424	tags=90%, list=75%, signal=361%
KEGG_RIG_I_LIKE_RECEPTOR_SIGNALING_PATHWAY	40	0.0984127	0.732149	0.771543	0.900919	1	5792	tags=90%, list=80%, signal=452%
KEGG_STARCH_AND_SUCROSE_METABOLISM	23	0.126129	0.729396	0.811069	0.883142	1	1289	tags=30%, list=18%, signal=37%
KEGG_GLIOMA	34	0.105167	0.723897	0.804	0.870342	1	5403	tags=85%, list=75%, signal=337%
KEGG_RNA_POLYMERASE	17	0.14454	0.713668	0.814286	0.863839	1	2781	tags=53%, list=39%, signal=86%
KEGG_CYTOSOLIC_DNA_SENSING_PATHWAY	27	0.114251	0.696487	0.842205	0.866098	1	5864	tags=93%, list=81%, signal=491%
KEGG_THYROID_CANCER	17	0.109466	0.538326	0.972495	0.976353	1	4733	tags=76%, list=66%, signal=221%

## Sheet: G12D vs WT Protein
Timestamp	1527179521146
NAME	SIZE	ES	NES	NOM p-val	FDR q-val	FWER p-val	RANK AT MAX	LEADING EDGE
KEGG_ECM_RECEPTOR_INTERACTION	50	-0.436074	-3.70135	0	0	0	1640	tags=66%, list=23%, signal=85%
KEGG_VALINE_LEUCINE_AND_ISOLEUCINE_DEGRADATION	41	-0.442295	-3.36088	0	0	0	2990	tags=85%, list=41%, signal=145%
KEGG_FOCAL_ADHESION	128	-0.246168	-3.19947	0	0	0	1640	tags=47%, list=23%, signal=60%
KEGG_SPLICEOSOME	115	-0.258731	-3.17675	0	0	0	4505	tags=88%, list=62%, signal=230%
KEGG_TIGHT_JUNCTION	64	-0.319166	-3.06539	0	0	0	2343	tags=64%, list=32%, signal=94%
KEGG_HEMATOPOIETIC_CELL_LINEAGE	38	-0.402495	-2.96617	0	0	0	2621	tags=76%, list=36%, signal=119%
KEGG_REGULATION_OF_ACTIN_CYTOSKELETON	133	-0.207682	-2.79996	0	0	0	2547	tags=56%, list=35%, signal=84%
KEGG_B_CELL_RECEPTOR_SIGNALING_PATHWAY	59	-0.296566	-2.71636	0	0.000170455	0.001	3385	tags=76%, list=47%, signal=142%
KEGG_ARRHYTHMOGENIC_RIGHT_VENTRICULAR_CARDIOMYOPATHY_ARVC	30	-0.410206	-2.71065	0	0.000151515	0.001	1384	tags=60%, list=19%, signal=74%
KEGG_PRIMARY_IMMUNODEFICIENCY	20	-0.495543	-2.64316	0	0.000136364	0.001	3293	tags=95%, list=46%, signal=174%
KEGG_TRYPTOPHAN_METABOLISM	25	-0.438722	-2.61283	0	0.000249565	0.002	2910	tags=84%, list=40%, signal=140%
KEGG_LEUKOCYTE_TRANSENDOTHELIAL_MIGRATION	69	-0.261336	-2.5144	0	0.00166103	0.014	3365	tags=72%, list=47%, signal=134%
KEGG_ADHERENS_JUNCTION	49	-0.298241	-2.39475	0	0.0029922	0.027	4052	tags=86%, list=56%, signal=194%
KEGG_BETA_ALANINE_METABOLISM	14	-0.526796	-2.38538	0.0021097	0.00344571	0.034	2910	tags=93%, list=40%, signal=155%
KEGG_CELL_ADHESION_MOLECULES_CAMS	42	-0.313629	-2.3722	0	0.00366252	0.039	1876	tags=57%, list=26%, signal=77%
KEGG_BUTANOATE_METABOLISM	22	-0.416654	-2.34684	0.00394477	0.00411357	0.047	2910	tags=82%, list=40%, signal=137%
KEGG_T_CELL_RECEPTOR_SIGNALING_PATHWAY	66	-0.245799	-2.3429	0.00391389	0.00410837	0.05	3385	tags=71%, list=47%, signal=133%
KEGG_LONG_TERM_DEPRESSION	33	-0.331293	-2.31061	0	0.0046838	0.06	2434	tags=67%, list=34%, signal=100%
KEGG_FATTY_ACID_METABOLISM	30	-0.352799	-2.30232	0	0.00450999	0.061	3482	tags=83%, list=48%, signal=160%
KEGG_VASCULAR_SMOOTH_MUSCLE_CONTRACTION	60	-0.253169	-2.29416	0.00200401	0.00474256	0.068	2521	tags=60%, list=35%, signal=91%
KEGG_HUNTINGTONS_DISEASE	121	-0.17099	-2.1983	0	0.00784917	0.115	5591	tags=94%, list=77%, signal=410%
KEGG_PROPANOATE_METABOLISM	25	-0.358444	-2.14184	0	0.0110647	0.163	2910	tags=76%, list=40%, signal=127%
KEGG_ARGININE_AND_PROLINE_METABOLISM	33	-0.306394	-2.06443	0.00401606	0.0173435	0.257	2613	tags=67%, list=36%, signal=104%
KEGG_PATHOGENIC_ESCHERICHIA_COLI_INFECTION	39	-0.275019	-2.02395	0.002079	0.0204811	0.305	4692	tags=92%, list=65%, signal=262%
KEGG_FC_GAMMA_R_MEDIATED_PHAGOCYTOSIS	71	-0.199293	-1.94591	0.01341	0.0308906	0.431	2136	tags=49%, list=30%, signal=69%
KEGG_MAPK_SIGNALING_PATHWAY	117	-0.151459	-1.9013	0.0117417	0.038608	0.526	3863	tags=68%, list=53%, signal=145%
KEGG_OXIDATIVE_PHOSPHORYLATION	88	-0.1756	-1.90122	0.00584795	0.0371781	0.526	5642	tags=95%, list=78%, signal=431%
KEGG_MELANOGENESIS	30	-0.285085	-1.89414	0.0103734	0.0374453	0.546	3969	tags=83%, list=55%, signal=184%
KEGG_PHOSPHATIDYLINOSITOL_SIGNALING_SYSTEM	46	-0.240385	-1.88235	0.0140562	0.0385702	0.575	2044	tags=52%, list=28%, signal=72%
KEGG_PYRUVATE_METABOLISM	30	-0.287319	-1.87208	0.014553	0.0398622	0.599	2990	tags=70%, list=41%, signal=119%
KEGG_ALZHEIMERS_DISEASE	108	-0.152446	-1.84745	0.015444	0.0440904	0.647	4333	tags=75%, list=60%, signal=185%
KEGG_AMINO_SUGAR_AND_NUCLEOTIDE_SUGAR_METABOLISM	37	-0.251511	-1.82652	0.0124481	0.0478031	0.692	3464	tags=73%, list=48%, signal=140%
KEGG_DRUG_METABOLISM_CYTOCHROME_P450	22	-0.321073	-1.7863	0.018595	0.0580434	0.764	972	tags=45%, list=13%, signal=52%
KEGG_CITRATE_CYCLE_TCA_CYCLE	25	-0.301615	-1.7809	0.0163934	0.0582965	0.774	3319	tags=76%, list=46%, signal=140%
KEGG_AXON_GUIDANCE	52	-0.212794	-1.77975	0.0241449	0.0569091	0.774	3614	tags=71%, list=50%, signal=141%
KEGG_PARKINSONS_DISEASE	92	-0.156241	-1.75321	0.0243408	0.0634046	0.825	5638	tags=93%, list=78%, signal=421%
KEGG_PROTEASOME	40	-0.233473	-1.74117	0.028866	0.0656859	0.844	4824	tags=90%, list=67%, signal=270%
KEGG_SMALL_CELL_LUNG_CANCER	51	-0.199721	-1.72591	0.015625	0.0684487	0.861	2109	tags=49%, list=29%, signal=69%
KEGG_CHEMOKINE_SIGNALING_PATHWAY	90	-0.155593	-1.72513	0.01875	0.0669131	0.861	3385	tags=62%, list=47%, signal=116%
KEGG_METABOLISM_OF_XENOBIOTICS_BY_CYTOCHROME_P450	20	-0.316426	-1.72307	0.0198807	0.0656188	0.862	972	tags=45%, list=13%, signal=52%
KEGG_GAP_JUNCTION	49	-0.203908	-1.67785	0.0480167	0.0796647	0.913	2960	tags=61%, list=41%, signal=103%
KEGG_DILATED_CARDIOMYOPATHY	36	-0.234739	-1.66952	0.0256917	0.0812185	0.918	2527	tags=58%, list=35%, signal=89%
KEGG_TERPENOID_BACKBONE_BIOSYNTHESIS	11	-0.409564	-1.66799	0.0316456	0.0799297	0.92	2300	tags=73%, list=32%, signal=107%
KEGG_GLUTATHIONE_METABOLISM	35	-0.238093	-1.64892	0.0374753	0.0854845	0.935	2004	tags=51%, list=28%, signal=71%
KEGG_LONG_TERM_POTENTIATION	37	-0.222502	-1.62436	0.0417457	0.0952254	0.967	4258	tags=81%, list=59%, signal=197%
KEGG_HYPERTROPHIC_CARDIOMYOPATHY_HCM	35	-0.222743	-1.5924	0.038835	0.108133	0.98	2527	tags=57%, list=35%, signal=87%
KEGG_GLYCOLYSIS_GLUCONEOGENESIS	39	-0.214931	-1.57617	0.057971	0.114135	0.984	3457	tags=69%, list=48%, signal=132%
KEGG_APOPTOSIS	54	-0.1796	-1.5735	0.0564202	0.113034	0.985	4197	tags=76%, list=58%, signal=180%
KEGG_VIBRIO_CHOLERAE_INFECTION	30	-0.24035	-1.56093	0.0433884	0.116673	0.987	4050	tags=80%, list=56%, signal=181%
KEGG_TGF_BETA_SIGNALING_PATHWAY	35	-0.220295	-1.55206	0.0669216	0.118657	0.987	3989	tags=77%, list=55%, signal=171%
KEGG_PHENYLALANINE_METABOLISM	11	-0.379521	-1.54998	0.0518359	0.117577	0.988	547	tags=45%, list=8%, signal=49%
KEGG_PATHWAYS_IN_CANCER	157	-0.11012	-1.54677	0.0436508	0.117076	0.989	4145	tags=68%, list=57%, signal=156%
KEGG_ARACHIDONIC_ACID_METABOLISM	18	-0.299479	-1.54287	0.0541082	0.116554	0.99	2257	tags=61%, list=31%, signal=89%
KEGG_ANTIGEN_PROCESSING_AND_PRESENTATION	32	-0.232006	-1.5414	0.0764463	0.115176	0.99	3298	tags=69%, list=46%, signal=126%
KEGG_COMPLEMENT_AND_COAGULATION_CASCADES	46	-0.188963	-1.50093	0.0764588	0.134981	0.997	1471	tags=39%, list=20%, signal=49%
KEGG_GLYCEROLIPID_METABOLISM	25	-0.249348	-1.48989	0.0887097	0.139398	0.999	1673	tags=48%, list=23%, signal=62%
KEGG_RNA_DEGRADATION	51	-0.174029	-1.46273	0.0841889	0.154367	0.999	5267	tags=90%, list=73%, signal=331%
KEGG_RIBOFLAVIN_METABOLISM	10	-0.373544	-1.43665	0.0996016	0.169102	1	918	tags=50%, list=13%, signal=57%
KEGG_LYSINE_DEGRADATION	29	-0.218771	-1.40173	0.112648	0.191536	1	2910	tags=62%, list=40%, signal=104%
KEGG_ALANINE_ASPARTATE_AND_GLUTAMATE_METABOLISM	21	-0.254872	-1.38842	0.120507	0.19931	1	573	tags=33%, list=8%, signal=36%
KEGG_CARDIAC_MUSCLE_CONTRACTION	36	-0.190107	-1.37257	0.131313	0.209183	1	4252	tags=78%, list=59%, signal=188%
KEGG_NEUROTROPHIN_SIGNALING_PATHWAY	77	-0.130223	-1.35133	0.119919	0.223045	1	3385	tags=60%, list=47%, signal=111%
KEGG_TYROSINE_METABOLISM	17	-0.268947	-1.35047	0.130268	0.220496	1	1037	tags=41%, list=14%, signal=48%
KEGG_NOD_LIKE_RECEPTOR_SIGNALING_PATHWAY	34	-0.193001	-1.33718	0.136538	0.228811	1	3924	tags=74%, list=54%, signal=160%
KEGG_NATURAL_KILLER_CELL_MEDIATED_CYTOTOXICITY	60	-0.147598	-1.33068	0.140351	0.231405	1	2916	tags=55%, list=40%, signal=91%
KEGG_EPITHELIAL_CELL_SIGNALING_IN_HELICOBACTER_PYLORI_INFECTION	40	-0.178209	-1.31976	0.138776	0.237851	1	5582	tags=95%, list=77%, signal=416%
KEGG_LYSOSOME	93	-0.116068	-1.31586	0.163934	0.23752	1	3134	tags=55%, list=43%, signal=96%
KEGG_PROSTATE_CANCER	50	-0.157596	-1.3014	0.138776	0.247835	1	4215	tags=74%, list=58%, signal=176%
KEGG_GLYCINE_SERINE_AND_THREONINE_METABOLISM	17	-0.258701	-1.29467	0.16	0.25102	1	686	tags=35%, list=9%, signal=39%
KEGG_PPAR_SIGNALING_PATHWAY	36	-0.183791	-1.29017	0.184971	0.25204	1	4498	tags=81%, list=62%, signal=213%
KEGG_FRUCTOSE_AND_MANNOSE_METABOLISM	28	-0.199353	-1.26043	0.175781	0.277028	1	1662	tags=43%, list=23%, signal=55%
KEGG_RENIN_ANGIOTENSIN_SYSTEM	10	-0.31589	-1.23322	0.20381	0.302076	1	2056	tags=60%, list=28%, signal=84%
KEGG_GALACTOSE_METABOLISM	20	-0.233685	-1.22724	0.219178	0.304048	1	1929	tags=50%, list=27%, signal=68%
KEGG_CALCIUM_SIGNALING_PATHWAY	54	-0.143767	-1.22393	0.218623	0.303644	1	2314	tags=46%, list=32%, signal=68%
KEGG_VASOPRESSIN_REGULATED_WATER_REABSORPTION	24	-0.207766	-1.21648	0.216981	0.307276	1	3922	tags=75%, list=54%, signal=164%
KEGG_FC_EPSILON_RI_SIGNALING_PATHWAY	46	-0.150641	-1.21186	0.226908	0.307845	1	4101	tags=72%, list=57%, signal=165%
KEGG_ALDOSTERONE_REGULATED_SODIUM_REABSORPTION	20	-0.221619	-1.19462	0.241237	0.322264	1	2377	tags=55%, list=33%, signal=82%
KEGG_CYTOSOLIC_DNA_SENSING_PATHWAY	27	-0.188052	-1.18508	0.234252	0.328668	1	5335	tags=93%, list=74%, signal=353%
KEGG_NICOTINATE_AND_NICOTINAMIDE_METABOLISM	15	-0.244651	-1.12749	0.299435	0.392893	1	2571	tags=60%, list=36%, signal=93%
KEGG_GLYCEROPHOSPHOLIPID_METABOLISM	34	-0.160766	-1.12551	0.304015	0.390377	1	2244	tags=47%, list=31%, signal=68%
KEGG_ACUTE_MYELOID_LEUKEMIA	40	-0.145712	-1.07041	0.369072	0.462329	1	4371	tags=75%, list=61%, signal=189%
KEGG_CYTOKINE_CYTOKINE_RECEPTOR_INTERACTION	36	-0.151622	-1.06473	0.345912	0.464675	1	1720	tags=39%, list=24%, signal=51%
KEGG_INOSITOL_PHOSPHATE_METABOLISM	37	-0.14976	-1.06002	0.376842	0.465584	1	2048	tags=43%, list=28%, signal=60%
KEGG_ENDOMETRIAL_CANCER	34	-0.152517	-1.0544	0.361789	0.467928	1	4215	tags=74%, list=58%, signal=176%
KEGG_RENAL_CELL_CARCINOMA	43	-0.132496	-1.03685	0.415217	0.486523	1	5600	tags=91%, list=78%, signal=401%
KEGG_GNRH_SIGNALING_PATHWAY	42	-0.133937	-1.00932	0.438597	0.520345	1	3854	tags=67%, list=53%, signal=142%
KEGG_CYSTEINE_AND_METHIONINE_METABOLISM	22	-0.181452	-1.00789	0.456522	0.516621	1	1649	tags=41%, list=23%, signal=53%
KEGG_HISTIDINE_METABOLISM	15	-0.216401	-1.00218	0.451219	0.518659	1	4219	tags=80%, list=58%, signal=192%
KEGG_VIRAL_MYOCARDITIS	33	-0.145943	-0.992435	0.451807	0.52729	1	1578	tags=36%, list=22%, signal=46%
KEGG_VEGF_SIGNALING_PATHWAY	42	-0.130196	-0.986073	0.448065	0.530558	1	3365	tags=60%, list=47%, signal=111%
KEGG_WNT_SIGNALING_PATHWAY	62	-0.104032	-0.939176	0.515209	0.593796	1	3799	tags=63%, list=53%, signal=132%
KEGG_RNA_POLYMERASE	17	-0.185704	-0.924644	0.52071	0.60948	1	5885	tags=100%, list=81%, signal=539%
KEGG_PROXIMAL_TUBULE_BICARBONATE_RECLAMATION	12	-0.22203	-0.919427	0.553971	0.610865	1	2613	tags=58%, list=36%, signal=91%
KEGG_BIOSYNTHESIS_OF_UNSATURATED_FATTY_ACIDS	12	-0.213731	-0.915398	0.597536	0.610753	1	5682	tags=100%, list=79%, signal=468%
KEGG_THYROID_CANCER	17	-0.181639	-0.905733	0.548387	0.619352	1	4215	tags=76%, list=58%, signal=183%
KEGG_BASAL_TRANSCRIPTION_FACTORS	26	-0.144995	-0.866488	0.622449	0.673801	1	4513	tags=77%, list=62%, signal=204%
KEGG_COLORECTAL_CANCER	43	-0.109101	-0.859513	0.622309	0.678157	1	5600	tags=88%, list=78%, signal=391%
KEGG_REGULATION_OF_AUTOPHAGY	12	-0.21172	-0.859422	0.618449	0.671341	1	3891	tags=75%, list=54%, signal=162%
KEGG_PROTEIN_EXPORT	17	-0.168625	-0.852082	0.651303	0.676335	1	1335	tags=35%, list=18%, signal=43%
KEGG_ONE_CARBON_POOL_BY_FOLATE	12	-0.194891	-0.812357	0.701431	0.729876	1	1605	tags=42%, list=22%, signal=53%
KEGG_NON_SMALL_CELL_LUNG_CANCER	36	-0.111505	-0.790708	0.739754	0.753908	1	4215	tags=69%, list=58%, signal=166%
KEGG_GLYOXYLATE_AND_DICARBOXYLATE_METABOLISM	11	-0.183697	-0.747155	0.792531	0.807781	1	646	tags=27%, list=9%, signal=30%
KEGG_TYPE_II_DIABETES_MELLITUS	20	-0.132658	-0.713357	0.812877	0.844223	1	4101	tags=70%, list=57%, signal=162%
KEGG_CHRONIC_MYELOID_LEUKEMIA	51	-0.0803618	-0.681626	0.894	0.873416	1	4381	tags=69%, list=61%, signal=173%
KEGG_PENTOSE_PHOSPHATE_PATHWAY	20	-0.123605	-0.652993	0.883534	0.894982	1	3444	tags=60%, list=48%, signal=114%
KEGG_DNA_REPLICATION	37	0.591604	4.3272	0	0	0	1604	tags=81%, list=22%, signal=104%
KEGG_RIBOSOME	79	0.350433	3.67203	0	0	0	2341	tags=67%, list=32%, signal=98%
KEGG_CELL_CYCLE	80	0.294291	3.04687	0	0	0	1779	tags=54%, list=25%, signal=71%
KEGG_MISMATCH_REPAIR	22	0.451439	2.54485	0	0.000490017	0.003	2001	tags=73%, list=28%, signal=100%
KEGG_PORPHYRIN_AND_CHLOROPHYLL_METABOLISM	19	0.42011	2.13142	0	0.0207996	0.161	774	tags=53%, list=11%, signal=59%
KEGG_P53_SIGNALING_PATHWAY	27	0.33444	2.04673	0	0.0305897	0.263	535	tags=41%, list=7%, signal=44%
KEGG_NUCLEOTIDE_EXCISION_REPAIR	36	0.279084	1.92517	0.00407332	0.0576722	0.496	3410	tags=75%, list=47%, signal=141%
KEGG_SYSTEMIC_LUPUS_ERYTHEMATOSUS	37	0.257564	1.87131	0.00408163	0.0673403	0.592	1857	tags=51%, list=26%, signal=69%
KEGG_STARCH_AND_SUCROSE_METABOLISM	23	0.287818	1.63324	0.0402414	0.197354	0.947	2009	tags=57%, list=28%, signal=78%
KEGG_LEISHMANIA_INFECTION	30	0.251112	1.62739	0.0451866	0.181183	0.948	1804	tags=50%, list=25%, signal=66%
KEGG_SNARE_INTERACTIONS_IN_VESICULAR_TRANSPORT	29	0.255104	1.62259	0.04	0.168188	0.948	5137	tags=97%, list=71%, signal=333%
KEGG_UBIQUITIN_MEDIATED_PROTEOLYSIS	86	0.14283	1.55079	0.0510204	0.217801	0.984	5362	tags=88%, list=74%, signal=339%
KEGG_HOMOLOGOUS_RECOMBINATION	15	0.323463	1.53689	0.0570866	0.214455	0.986	2001	tags=60%, list=28%, signal=83%
KEGG_RETINOL_METABOLISM	10	0.367221	1.4248	0.105368	0.330375	1	2406	tags=70%, list=33%, signal=105%
KEGG_OOCYTE_MEIOSIS	61	0.149965	1.39381	0.107505	0.351224	1	701	tags=25%, list=10%, signal=27%
KEGG_PYRIMIDINE_METABOLISM	70	0.135694	1.32392	0.139764	0.432754	1	2330	tags=46%, list=32%, signal=67%
KEGG_AMINOACYL_TRNA_BIOSYNTHESIS	39	0.169099	1.24885	0.184584	0.536467	1	5636	tags=95%, list=78%, signal=430%
KEGG_PEROXISOME	47	0.147234	1.19936	0.217484	0.606384	1	4628	tags=79%, list=64%, signal=218%
KEGG_DRUG_METABOLISM_OTHER_ENZYMES	20	0.215496	1.16814	0.259414	0.637933	1	2058	tags=50%, list=28%, signal=70%
KEGG_ENDOCYTOSIS	112	0.094879	1.14722	0.285714	0.652916	1	6224	tags=96%, list=86%, signal=681%
KEGG_AMYOTROPHIC_LATERAL_SCLEROSIS_ALS	28	0.184906	1.13083	0.297087	0.656527	1	5117	tags=89%, list=71%, signal=305%
KEGG_DORSO_VENTRAL_AXIS_FORMATION	10	0.286439	1.10859	0.330612	0.672646	1	822	tags=40%, list=11%, signal=45%
KEGG_NOTCH_SIGNALING_PATHWAY	17	0.224828	1.10315	0.326733	0.65497	1	3477	tags=71%, list=48%, signal=136%
KEGG_N_GLYCAN_BIOSYNTHESIS	25	0.18471	1.09485	0.339768	0.644212	1	5025	tags=88%, list=70%, signal=288%
KEGG_PROGESTERONE_MEDIATED_OOCYTE_MATURATION	49	0.132168	1.07485	0.361345	0.659278	1	967	tags=27%, list=13%, signal=30%
KEGG_HEDGEHOG_SIGNALING_PATHWAY	11	0.261545	1.04512	0.392045	0.694176	1	5335	tags=100%, list=74%, signal=382%
KEGG_RIG_I_LIKE_RECEPTOR_SIGNALING_PATHWAY	40	0.138395	1.03193	0.429961	0.697049	1	4241	tags=73%, list=59%, signal=175%
KEGG_NEUROACTIVE_LIGAND_RECEPTOR_INTERACTION	19	0.196504	1.02483	0.404453	0.686393	1	104	tags=21%, list=1%, signal=21%
KEGG_BLADDER_CANCER	19	0.195445	1.01934	0.429158	0.673736	1	5053	tags=89%, list=70%, signal=297%
KEGG_PRION_DISEASES	22	0.179646	1.00916	0.416667	0.670374	1	5271	tags=91%, list=73%, signal=335%
KEGG_PURINE_METABOLISM	102	0.0835564	0.981168	0.472222	0.703188	1	1599	tags=30%, list=22%, signal=38%
KEGG_ERBB_SIGNALING_PATHWAY	48	0.113959	0.933665	0.520468	0.772429	1	6253	tags=98%, list=87%, signal=725%
KEGG_MTOR_SIGNALING_PATHWAY	33	0.136947	0.928002	0.549683	0.76004	1	4048	tags=70%, list=56%, signal=158%
KEGG_BASE_EXCISION_REPAIR	25	0.156582	0.902012	0.565217	0.784619	1	1472	tags=36%, list=20%, signal=45%
KEGG_JAK_STAT_SIGNALING_PATHWAY	43	0.113943	0.894142	0.573386	0.776737	1	6403	tags=100%, list=89%, signal=877%
KEGG_SPHINGOLIPID_METABOLISM	19	0.166356	0.869804	0.648485	0.798678	1	3362	tags=63%, list=47%, signal=118%
KEGG_ABC_TRANSPORTERS	18	0.167268	0.860609	0.642293	0.793635	1	2405	tags=50%, list=33%, signal=75%
KEGG_OTHER_GLYCAN_DEGRADATION	13	0.189133	0.828072	0.663405	0.829745	1	5302	tags=92%, list=73%, signal=347%
KEGG_PANCREATIC_CANCER	47	0.0984506	0.788295	0.733068	0.876123	1	5439	tags=85%, list=75%, signal=342%
KEGG_GLYCOSAMINOGLYCAN_DEGRADATION	12	0.182987	0.764071	0.751503	0.893931	1	1087	tags=33%, list=15%, signal=39%
KEGG_TOLL_LIKE_RECEPTOR_SIGNALING_PATHWAY	52	0.086847	0.746009	0.8	0.901109	1	5765	tags=88%, list=80%, signal=435%
KEGG_GLIOMA	34	0.105118	0.7418	0.790984	0.885607	1	6253	tags=97%, list=87%, signal=720%
KEGG_INSULIN_SIGNALING_PATHWAY	81	0.0682219	0.703742	0.837524	0.917463	1	1830	tags=32%, list=25%, signal=43%
KEGG_SELENOAMINO_ACID_METABOLISM	17	0.135053	0.663674	0.868313	0.94471	1	3699	tags=65%, list=51%, signal=132%
KEGG_ETHER_LIPID_METABOLISM	12	0.155386	0.659455	0.880325	0.928012	1	1286	tags=33%, list=18%, signal=40%
KEGG_MELANOMA	29	0.0999535	0.641435	0.916497	0.926162	1	6253	tags=97%, list=87%, signal=717%
KEGG_ADIPOCYTOKINE_SIGNALING_PATHWAY	35	0.092234	0.640636	0.921371	0.907175	1	4082	tags=66%, list=57%, signal=150%

## Sheet: A146T vs WT Scaled Phospho
Timestamp	1527175790965
NAME	SIZE	ES	NES	NOM p-val	FDR q-val	FWER p-val	RANK AT MAX	LEADING EDGE
CAMK2A	15	-0.339286	-1.57634	0.0461847	0.575466	0.422	3664	tags=87%, list=53%, signal=183%
PKCD	11	-0.351743	-1.44467	0.0880503	0.54229	0.641	1979	tags=64%, list=29%, signal=89%
GSK3B	20	-0.260353	-1.37401	0.124016	0.49394	0.751	4096	tags=85%, list=59%, signal=207%
PKACA	74	-0.127478	-1.28999	0.1881	0.509333	0.847	3719	tags=66%, list=54%, signal=141%
PLK1	17	-0.261454	-1.27381	0.182342	0.431863	0.868	3904	tags=82%, list=56%, signal=188%
AMPKA1	11	-0.319488	-1.25402	0.184959	0.384931	0.893	4094	tags=91%, list=59%, signal=222%
MTOR	36	-0.16285	-1.15357	0.302605	0.473364	0.963	3116	tags=61%, list=45%, signal=110%
AKT1	28	-0.179254	-1.14753	0.256972	0.424179	0.965	1983	tags=46%, list=29%, signal=65%
PKCA	20	-0.208531	-1.10852	0.316456	0.427066	0.98	1680	tags=45%, list=24%, signal=59%
P90RSK	13	-0.232147	-1.02007	0.436508	0.498857	0.995	528	tags=31%, list=8%, signal=33%
CHK1	12	-0.212738	-0.912898	0.565217	0.603306	1	4308	tags=83%, list=62%, signal=220%
PAK1	16	-0.173121	-0.81873	0.696429	0.68373	1	4872	tags=88%, list=70%, signal=293%
CDK2	109	0.296427	3.5692	0	0	0	3575	tags=81%, list=52%, signal=164%
ERK2	83	0.293585	3.18272	0	0	0	3586	tags=81%, list=52%, signal=165%
CDK1	74	0.263193	2.61447	0	0.00025641	0.001	2692	tags=65%, list=39%, signal=105%
ERK1	41	0.251674	1.91247	0.00782779	0.0241942	0.099	3508	tags=76%, list=51%, signal=152%
CDK5	23	0.245071	1.4099	0.0961145	0.207395	0.698	3733	tags=78%, list=54%, signal=169%
CK2A1	53	0.117292	1.02342	0.412602	0.674435	0.988	4819	tags=81%, list=69%, signal=264%
CDK4	10	0.255097	1.0052	0.41189	0.607932	0.99	3781	tags=80%, list=55%, signal=176%
P38A	27	0.146379	0.922774	0.52588	0.670084	1	2841	tags=56%, list=41%, signal=94%
JNK1	14	0.178272	0.793981	0.701349	0.800721	1	5701	tags=100%, list=82%, signal=560%
AURB	13	0.150046	0.636937	0.904471	0.910162	1	2695	tags=54%, list=39%, signal=88%

## Sheet: G12D vs WT Scaled Phospho
Timestamp	1527175725666
NAME	SIZE	ES	NES	NOM p-val	FDR q-val	FWER p-val	RANK AT MAX	LEADING EDGE
GSK3B	20	-0.284384	-1.54351	0.0679012	0.803274	0.469	3583	tags=80%, list=52%, signal=165%
AMPKA1	11	-0.350102	-1.41633	0.0934183	0.708815	0.69	3882	tags=91%, list=56%, signal=206%
PKCA	20	-0.225159	-1.23387	0.198058	0.961102	0.901	5033	tags=95%, list=73%, signal=345%
P90RSK	13	-0.275203	-1.21581	0.213992	0.768155	0.918	1297	tags=46%, list=19%, signal=57%
AKT1	28	-0.192241	-1.19483	0.258449	0.659701	0.935	2141	tags=50%, list=31%, signal=72%
PLK1	17	-0.232982	-1.18067	0.238901	0.580997	0.94	4101	tags=82%, list=59%, signal=201%
PKACA	74	-0.113504	-1.15418	0.256461	0.542053	0.949	4471	tags=76%, list=64%, signal=211%
CAMK2A	15	-0.232365	-1.09086	0.327381	0.583906	0.979	2092	tags=53%, list=30%, signal=76%
PAK1	16	-0.21539	-1.04628	0.389899	0.596108	0.991	678	tags=31%, list=10%, signal=35%
CK2A1	53	-0.121555	-1.02517	0.410714	0.570745	0.993	5446	tags=91%, list=79%, signal=418%
PKCD	11	-0.242494	-0.962687	0.486922	0.615929	0.998	2105	tags=55%, list=30%, signal=78%
CHK1	12	-0.194252	-0.816756	0.712831	0.806444	1	3858	tags=75%, list=56%, signal=169%
JNK1	14	-0.176043	-0.807248	0.714004	0.758535	1	1755	tags=43%, list=25%, signal=57%
MTOR	36	-0.105749	-0.756428	0.773513	0.771596	1	1776	tags=36%, list=26%, signal=48%
CDK2	109	0.313023	3.74024	0	0	0	2889	tags=72%, list=42%, signal=122%
CDK1	74	0.247296	2.46451	0	0.000307692	0.001	3176	tags=70%, list=46%, signal=128%
ERK2	83	0.193416	2.08232	0.00198413	0.00775287	0.031	2434	tags=54%, list=35%, signal=83%
ERK1	41	0.19769	1.50334	0.0732673	0.143072	0.548	1681	tags=44%, list=24%, signal=58%
AURB	13	0.315237	1.39683	0.11068	0.173286	0.707	3152	tags=77%, list=45%, signal=141%
CDK4	10	0.35039	1.35034	0.143426	0.175065	0.775	3121	tags=80%, list=45%, signal=145%
P38A	27	0.204162	1.28904	0.16171	0.189534	0.851	1928	tags=48%, list=28%, signal=66%
CDK5	23	0.220838	1.25508	0.180328	0.187273	0.885	1488	tags=43%, list=21%, signal=55%

## Sheet: Cell cycle
AccID	Gene	A146T:WT	G12D:WT
P25322	Ccnd1	1.32324	0
Q64163	Tfdp2	0.835869	0
Q08639	Tfdp1	0.75684	0
O88708	Orc4	0	0.694384
Q9WTX8	Mad1l1	0	0.818444
Q61458	Ccnh	0	0.8646
Q9JKK8	Atr	0	0.987648
P07759	Serpina3k	0	1.04564
P04202	Tgfb1	0.647339	0.682426
Q9JK30	Orc3	0.676492	0.649938
Q03147	Cdk7	0.783698	0.65248
Q9WUV0	Orc5	0.720804	0.804223
P30285	Cdk4	0.853651	0.832404
Q9Z1B5	Mad2l1	1.0898	1.09364
Q64701	Rbl1	0.936257	1.15326
Q99JP4	Cdc26	0.626643	1.34993
Q8BTZ4	Anapc5	0.848164	1.45074
Q60862	Orc2	0.875418	1.37056
P56931	E2f2	0.997162	1.4192
Q8R0K9	E2f4	1.00624	1.52897
A2A6Q5	Cdc27	1.17528	1.46293
P97311	Mcm6	1.21409	1.5471
Q64261	Cdk6	1.34961	1.57476
P97310	Mcm2	1.4056	1.59862
P17918	Pcna	1.6503	1.43199
Q9R1K5	Fzr1	1.16653	2.06827
P49718	Mcm5	1.33277	1.88788
P97377	Cdk2	1.43563	1.78672
Q9Z265	Chek2	1.46421	1.86721
P49717	Mcm4	1.53882	1.9917
Q61881	Mcm7	1.56753	1.91421
P25206	Mcm3	1.58829	1.79009
Q9JJ66	Cdc20	1.90584	1.70544
Q9Z1S0	Bub1b	1.91412	1.7455
P13405	Rb1	1.89858	1.91751
O35280	Chek1	2.23733	1.9635
Q60773	Cdkn2d	1.64671	2.53499
Q9CQJ7	Pttg1	1.76431	2.6468
Q9Z1N2	Orc1	2.06097	2.70847
P30282	Ccnd3	2.62479	2.89338
P11440	Cdk1	2.54175	3.12944
O89033	Cdc6	2.61302	3.30283
Q07832	Plk1	2.75342	3.4152
P35761	Ttk	2.99248	3.20896
P51943	Ccna2	3.17862	3.49684
P30276	Ccnb2	3.37261	4.10665

## Sheet: Complement and Coag. Cascades
AccID	Gene	A146T:WT	G12D:WT
Q4KMM3	Oxr1	-0.145197	0
P49182	Serpind1	-0.151072	0
O88783	F5	-0.169797	0
Q61838	A2m	-0.178244	0
P32261	Serpinc1	-0.190067	0
Q61247	Serpinf2	-0.216296	0
P08607	C4bpa	-0.259848	0
E9PV24	Fga	-0.388152	0
Q07968	F13b	-0.456451	0
Q8K0E8	Fgb	-0.659539	0
P04186	Cfb	-0.700696	0
Q61129	Cfi	-0.722181	0
P19221	F2	-0.506286	-0.725347
Q8VCM7	Fgg	-0.69694	-0.691972
P15306	Thbd	-0.68378	-0.749601
P26262	Klkb1	-0.814135	-0.80127
Q8CG14	C1sa	-0.904984	-0.843267
P01027	C3	-0.974403	-0.831979
P33587	Proc	-1.07343	-0.977781
Q91WP0	Masp2	-1.04108	-1.07473
P20918	Plg	-0.899185	-1.3109
P01029	C4b	-1.35396	-0.819727
P16294	F9	-1.46246	-1.36993
P41317	Mbl2	-1.40427	-1.56348
Q8CIZ8	Vwf	-1.27288	-1.51255
P03953	Cfd	-1.23499	-1.72954
P06909	Cfh	-1.50201	-1.81822
P19070	Cr2	-1.45916	-2.29507
Q61475	Cd55	-1.8805	-2.45209
E9Q3S5	Cr2	-2.14839	-3.00956

## Sheet: Camk2a
AccID	Gene	A146T:WT	G12D:WT
Q6R891_100	Ppp1r9b_100	-0.203913	0
P23242_365	Gja1_365	-0.234374	0
Q01147_142	Creb1_142	-0.261289	0
P46414_10	Cdkn1b_10	-0.278594	0
Q6PDN3_1795	Mylk_1795	-0.712572	0
Q62048_116	Pea15_116	-1.08712	-0.877794
Q4ACU6_1510	Shank3_1510	-0.913716	-1.02605
Q02248_552	Ctnnb1_552	-0.721274	-0.918941
P51432_537	Plcb3_537	-0.65603	-0.988001
P27577_251	Ets1_251	-0.660612	-1.22692
P54227_16	Stmn1_16	-1.30605	-2.61687
Q9Z2V6_488	Hdac5_488	-2.02676	-2.99584
P20152_412	Vim_412	-2.31247	-3.31899

## Sheet: Erk2
AccID	Gene	A146T:WT	G12D:WT
Q8CJF7_1954	Ahctf1_1954	1.53057	0.55122
Q7TPV4_1280	Mybbp1a_1280	1.03243	0
Q01320_1245	Top2a_1245	0.502157	0.124881
Q7TSC1_1217	Prrc2a_1217	0.360215	0
P54227_25	Stmn1_25	0.206608	0
E9Q616_4890	Ahnak_4890	0.099899	0
Q62219_141	Tgfb1i1_141	0.009542	0
Q8CHW4_540	Eif2b5_540	0.00634	0
Q8BUM3_93	Ptpn7_93	-0.032366	0
Q9R1E0_284	Foxo1_284	-0.051236	0.104822
Q9CWK8_104	Snx2_104	-0.054659	0.13035
P54227_38	Stmn1_38	-0.065898	0
Q99JX3_222	Gorasp2_222	-0.082614	0
Q9CQJ7_162	Pttg1_162	-0.105397	0
E9Q616_217	Ahnak_217	-0.137084	0
P09411_203	Pgk1_203	-0.16317	0
P97287_144	Mcl1_144	-0.178293	0
Q01320_1350	Top2a_1350	-0.223924	0
P58871_131	Tnks1bp1_131	-0.227968	0
Q9R1E0_326	Foxo1_326	-0.234129	0
Q8R1Q8_516	Dync1li1_516	-0.245799	0
P26645_46	Marcks_46	-0.252551	0
P11881_1765	Itpr1_1765	-0.252866	0
O55098_950	Stk10_950	-0.255967	0
Q62120_523	Jak2_523	-0.259775	0
O35737_104	Hnrnph1_104	-0.274681	0
Q8JZX4_71	Rbm17_71	-0.046675	0.198064
Q8JZX4_222	Rbm17_222	-0.09951	0.237729
Q91YD3_335	Dcp1a_335	-0.113161	0.247902
Q8K4Q0_863	Rptor_863	-0.181438	0.277696
Q60876_36	Eif4ebp1_36	-0.103327	0.342009
P46414_10	Cdkn1b_10	-0.278594	0.743733
P70302_575	Stim1_575	-0.046552	0.721716
Q62245_1164	Sos1_1164	0.018821	0.882787
Q80XK6_398	Atg2b_398	0.201152	0.857259
Q80YV2_353	Zc3hc1_353	0.373442	0.679071
Q6NZJ6_1231	Eif4g1_1231	0.346305	0.542808
Q6R891_205	Ppp1r9b_205	0.155411	0.578666
Q9R1E0_467	Foxo1_467	0.1361	0.506135
O55201_664	Supt5h_664	0.134578	0.31694
Q61165_697	Slc9a1_697	0.178626	0.290514
Q3UGS4_21	Fam195b_21	0.307558	0.379028
Q8VI36_83	Pxn_83	0.581889	0.456352
P42230_779	Stat5a_779	0.625759	0.697365
O88487_81	Dync1i2_81	0.724217	0.756263
P10833_201	Rras_201	0.824356	0.555569
Q9WTU0_651	Phf2_651	1.04934	0.725881
Q7TSC1_1002	Prrc2a_1002	0.559897	0.9868
P62908_221	Rps3_221	0.583966	0.872822
Q6ZQ58_751	Larp1_751	0.558075	0.799173
Q9WVH4_293	Foxo3_293	0.388749	0.812006
P49586_315	Pcyt1a_315	0.397518	0.942386
Q60592_1337	Mast2_1337	0.315464	1.03226
O88935_551	Syn1_551	0.338659	1.09895
P25976_201	Ubtf_201	0.326495	1.32414
Q9Z2D1_58	Mtmr2_58	0.477585	1.53239
Q9CPY3_222	Cdca5_222	0.604836	1.5204
A6H8H2_1221	Dennd4c_1221	0.611728	1.49058
F6ZDS4_2184	Tpr_2184	0.629942	1.49125
P58468_38	Fam207a_38	1.27485	1.30133
O70494_72	Sp3_72	1.28469	1.23568
Q99JX3_225	Gorasp2_225	1.16616	1.29862
P34152_948	Ptk2_948	1.09971	1.35106
Q8K1M6_622	Dnm1l_622	1.10389	1.45731
P63085_185	Mapk1_185	0.854651	2.11057
E9Q616_4906	Ahnak_4906	0.613025	2.23774
F6ZDS4_2223	Tpr_2223	1.76307	2.68795
