# Supplementary material for: Tissue-Specific Oncogenic Activity of KRASA146T
Source: Oxford University Press journal article supplement (doi:10.1158/2159-8290.cd-18-1220), 2019-04-05
Supplement: 21598290cd181220-sup-210474_2_supp_5431446_pp59my.xlsx [file 21598290cd181220-sup-210474_2_supp_5431446_pp59my.xlsx]

## Sheet: Table S2
Table S2: Total protein quantification from colons expressing WT or mutant K-Ras.
Accession Number	Gene	Protein	WT_1	WT_2	WT_3	A146T_1	A146T_2	A146T_3	G12D_1	G12D_2	G12D_3	FC A146T:WT	p value A146T:WT	FDR value A146T:WT	FC G12D:WT	p value G12D:WT	FDR value G12D:WT
Q922Q1	Marc2	MARC2	3973.41	3871.61	3798.56	5011.19	3388.9	3679.99	3392.63	4797.17	3584.78	0.950506	0.7	0.870445	0.925915	0.7	0.771399
Q9WV66	March7	MARH7	79.7151	71.3461	52.9095	66.1476	68.764	72.8983	91.9797	78.5828	79.3706	0.963809	1	1	1.11247	0.4	0.503145
P42209	Sept1	SEPT1	3181.59	2797.19	2763.02	2364.85	2124.88	1706.8	1123.3	1057.97	1310.71	0.759648	0.1	0.408745	0.401582	0.1	0.178349
P42208	Sept2	SEPT2	4374.5	4610.2	4604.07	4177.35	3978.37	4081.47	3535.53	3397.23	3607.36	0.886492	0.1	0.408745	0.767914	0.1	0.178349
Q9Z1S5	Sept3	SEPT3	1319.47	1187.87	966.753	800.745	835.242	774.385	752.598	649.762	793.043	0.674102	0.1	0.408745	0.633569	0.1	0.178349
P28661	Sept4	SEPT4	1692.58	1662.54	1587.01	1603.55	1984.56	1716.77	1874.68	1880.49	1910.04	1.03262	0.4	0.691041	1.13109	0.1	0.178349
Q9Z2Q6	Sept5	SEPT5	5034.71	4831.42	4536.01	4985.6	4742.31	4812.04	5217.04	4892.71	5035.69	0.995989	1	1	1.04228	0.2	0.301331
Q9R1T4	Sept6	SEPT6	9324.86	8926.29	9286.85	7418.51	7746.74	7772.71	6966.35	6811.66	7188.45	0.834162	0.1	0.408745	0.750131	0.1	0.178349
E9Q1G8	Sept7	E9Q1G8	4715.58	5212.5	4860.37	4960.07	4440.6	4420.45	5099.27	5898.43	5329.66	0.913634	0.4	0.691041	1.09655	0.2	0.301331
Q8CHH9	Sept8	SEPT8	1639.14	1583.36	1605.47	1492.49	1469.55	1535.97	1514.24	1402	1472.16	0.929628	0.1	0.408745	0.916965	0.1	0.178349
Q80UG5	Sept9	SEPT9	11467.5	11596.9	11144	10928.8	10975.7	12819.7	9605.43	11114.9	10612.8	0.957114	0.7	0.870445	0.925468	0.1	0.178349
Q8C650	Sept10	SEP10	1275.1	1532.83	1453.68	1423.92	1569.68	1657.06	1871.68	1811.03	1869.2	1.0798	0.4	0.691041	1.28584	0.1	0.178349
Q8C1B7	Sept11	SEP11	8468.47	8541.17	8514.76	7564.89	8056.19	8344.84	7543.52	7873.25	7718.12	0.946144	0.1	0.408745	0.90644	0.1	0.178349
Q9ERR7	Selenof	SEP15	1979.88	1365.04	1747.04	1442.93	1585.75	1432.9	1015.89	1292.58	1134.98	0.825928	0.7	0.870445	0.649659	0.1	0.178349
E0CYM0	1700019G17Rik	E0CYM0	137.293	157.356	168.902	159.462	175.687	158.762	163.517	106.798	170.156	1.01338	0.4	0.691041	1.03915	1	1
Q9D937	1810009A15Rik	Q9D937	1182.44	1093.41	1045.62	1435.1	1674.97	2082.87	1166.77	1038.84	1108.81	1.53188	0.1	0.408745	1.01408	1	1
Q5NC41	1810065E05Rik	Q5NC41	1358.72	1346.63	1146.9	1306.84	985.476	1173.43	963.652	563.491	851.206	0.871383	0.4	0.691041	0.632101	0.1	0.178349
Q3U687	2010002M12Rik	Q3U687	138.604	141.386	139.915	85.96	142.945	161.391	113.654	49.7003	83.2679	1.02166	0.7	0.870445	0.595132	0.1	0.178349
Q9CQ11	2010109I03Rik	Q9CQ11	484.15	233.522	237.28	632.862	671.015	615.758	760.469	385.739	324.765	2.66715	0.1	0.408745	1.62567	0.4	0.503145
E9Q3M9	2010300C02Rik	E9Q3M9	1107.81	960.321	918.266	1050.63	1112.57	1163.72	765.724	536.935	771.532	1.15854	0.2	0.528743	0.797363	0.1	0.178349
Q9CPN9	2210010C04Rik	Q9CPN9	787.957	397.522	99.4407	289.317	241.032	114.679	484.25	1252.9	430.117	0.606336	0.7	0.870445	1.21817	0.4	0.503145
G3X8U3	2210016F16Rik	G3X8U3	1863.95	1918.46	1729.17	1909.4	1684.69	2299.11	2138.95	2719.13	2064.31	1.02438	1	1	1.14754	0.1	0.178349
Q6YI28	2210407C18Rik	Q6YI28	171.678	99.2438	150.042	70.7681	36.2178	67.3843	66.9783	28.441	50.5454	0.449103	0.1	0.408745	0.336875	0.1	0.178349
Q6PGK3	2700097O09Rik	Q6PGK3	424.235	501.136	469.226	467.808	454.161	491.471	350.585	306.103	324.417	0.996978	1	1	0.691388	0.1	0.178349
Q8C5X1	4931406P16Rik	Q8C5X1	203.305	205.234	198.119	238.181	229.673	235.191	233.465	189.47	225.416	1.15684	0.1	0.408745	1.10876	0.7	0.771399
Q0VAW6	8030462N17Rik	Q0VAW6	344.232	303.665	304.917	355.028	403.406	309.53	242.051	191.856	225.393	1.16434	0.2	0.528743	0.739195	0.1	0.178349
D3Z623	9330159F19Rik	D3Z623	285.556	247.594	236.043	186.299	169.961	216.923	131.214	113.363	122.165	0.752437	0.1	0.408745	0.493409	0.1	0.178349
Q8BM26	9530003J23Rik	Q8BM26	281.483	366.228	99.7055	102.088	380.37	497.265	85.6906	87.7448	102.017	1.35131	0.4	0.691041	0.311723	0.2	0.301331
E9PVG8	9530053A07Rik	E9PVG8	9076.8	26489.3	6308.26	7385.55	6691.7	5935.76	10297.2	16111.8	19930.3	0.737231	0.4	0.691041	1.77505	0.7	0.771399
Q19LI2	A1bg	A1BG	1145	149.101	693.374	566.408	124.857	106.76	177.325	332.497	201.771	0.180072	0.2	0.528743	0.290999	0.7	0.771399
Q5YD48	A1cf	A1CF	1178.27	1335.86	1237.64	1403.98	1486.35	1397.52	1422.99	1489.64	1447.37	1.1344	0.1	0.408745	1.16946	0.1	0.178349
Q61838	A2m	A2M	12630.9	11517.7	12039.2	7477.94	8270.83	9014.53	8464.35	8453.1	8722.91	0.686992	0.1	0.408745	0.703066	0.1	0.178349
Q14BT6	A4gnt	Q14BT6	420.483	424.475	437.771	253.717	261.847	354.387	227.896	200.1	218.459	0.616873	0.1	0.408745	0.514657	0.1	0.178349
A2AK37	AA467197	A2AK37	3547.19	4145.34	4374.29	3332.13	4127.15	3587.09	3128.71	2678.25	3294.64	0.865331	0.4	0.691041	0.754754	0.1	0.178349
P58742	Aaas	AAAS	404.553	455.344	435	428.792	425.458	499.37	506.966	473.382	476.946	0.985729	1	1	1.09643	0.1	0.178349
Q9D2R0	Aacs	AACS	4745.21	5033.67	5647.14	5613.69	6168.12	5837.3	7132.45	7725.43	6943.13	1.15965	0.2	0.528743	1.41695	0.1	0.178349
Q99PG0	Aadac	AAAD	903.777	1165.19	1019.02	1682.04	1219.61	1302.58	1138.81	1139.07	1054.97	1.27827	0.1	0.408745	1.11755	0.7	0.771399
Q9D1A0	Aaed1	AAED1	29.8956	41.1695	38.3647	32.4104	30.5124	34.3728	32.1835	22.8247	35.1077	0.844797	0.7	0.870445	0.838883	0.4	0.503145
Q8R2R3	Aagab	AAGAB	597.669	635.747	532.23	598.015	619.695	522.399	679.392	599.522	642.934	1.00058	1	1	1.07574	0.2	0.301331
Q3UHJ0	Aak1	AAK1	1703.04	1718.23	1674.41	1928.01	1801.41	1668.6	1543	1149.14	1537.47	1.05776	0.7	0.870445	0.90278	0.1	0.178349
Q8R0P4	Aamdc	AAMDC	829.728	711.426	682.18	724.511	618.408	850.775	728.377	695.203	741.119	1.01839	1	1	1.02383	1	1
J3QN89	Aamp	J3QN89	1782.06	1699.88	1606.7	1917.15	1593.4	1745.35	2081.84	1692.42	1866.97	1.02675	1	1	1.0983	0.4	0.503145
Q9D2V5	Aar2	AAR2	70.7242	99.7391	92.0756	80.0823	87.5831	96.9684	93.2518	59.68	108.1	0.951209	1	1	1.01277	1	1
Q8BGQ7	Aars	SYAC	6387.52	8205.87	7814.32	6006.76	6182.55	8710.12	7312.11	7341.45	8436.83	0.791182	0.7	0.870445	0.939487	1	1
Q14CH7	Aars2	SYAM	1141.69	1214.05	1201.96	1214.76	1212.78	1421.08	1463.44	1323.67	1473.61	1.01065	0.2	0.528743	1.21755	0.1	0.178349
Q3THG9	Aarsd1	AASD1	1312.13	1158.22	1165.36	1374.45	1089.44	1342.96	1230.54	1677.17	1244.66	1.1524	0.7	0.870445	1.06805	0.4	0.503145
Q9CQF6	Aasdhppt	ADPPT	291.177	390.815	360.361	404.991	465.159	417.272	641.152	702.282	520.764	1.15793	0.1	0.408745	1.77919	0.1	0.178349
Q9JKX4	Aatf	AATF	1459.64	1611.02	1397.65	1753.4	2134.11	1816.58	1381.29	1323.17	1331.09	1.24454	0.1	0.408745	0.91193	0.1	0.178349
P61922	Abat	GABT	2774.15	3102.8	3030.38	3138.99	2858.03	3192.31	3367.25	3737.43	3515.85	1.03584	0.4	0.691041	1.1602	0.1	0.178349
Q8R420	Abca3	ABCA3	198.602	272.705	248.072	268.619	318.041	261.408	283.136	234.766	303.999	1.08283	0.4	0.691041	1.14135	0.4	0.503145
Q91V24	Abca7	ABCA7	181.597	224.514	197.903	201.574	168.955	223.64	224.802	245.431	232.463	1.01855	1	1	1.17463	0.1	0.178349
Q8K449	Abca9	ABCA9	446.72	462.544	469.894	445.927	425.417	460.392	471.051	456.462	450.06	0.964075	0.2	0.528743	0.986851	1	1
Q9JI39	Abcb10	ABCBA	1349.26	1682.86	1656.9	1536.12	1607.9	1695.69	1896.88	1713.67	1668.35	0.970427	1	1	1.03426	0.2	0.301331
Q9QY30	Abcb11	ABCBB	18.1469	44.107	22.9413	45.8217	40.5445	43.7	77.2472	32.8493	67.7849	1.90486	0.4	0.691041	2.95471	0.2	0.301331
P21447	Abcb1a	MDR1A	2842.15	4089	3913.37	5255.25	7657.67	7232.05	9946.88	9653.98	9839.43	1.84804	0.1	0.408745	2.51431	0.1	0.178349
Q9DC29	Abcb6	ABCB6	35.8431	38.8428	35.3815	36.7607	28.6002	35.854	33.1655	29.3642	33.768	1.0003	1	1	0.925297	0.1	0.178349
Q61102	Abcb7	ABCB7	2773.78	3664.49	3953.85	3260.9	3722.1	3587.84	4032.49	3711.46	4010.96	0.979083	1	1	1.09455	0.2	0.301331
Q9CXJ4	Abcb8	ABCB8	930.043	1216.01	1312.53	1076.56	1334.55	1341.83	1947.91	1751.41	1893.95	1.09748	0.4	0.691041	1.55751	0.1	0.178349
O35379	Abcc1	MRP1	925.153	1172.41	1115.67	878.99	1074.79	1116.35	1168.04	1175.64	1095.96	0.963358	0.7	0.870445	1.04694	0.7	0.771399
Q8R4P9	Abcc10	MRP7	632.968	510.85	647.229	902.333	450.309	928.331	587.165	440.748	486.27	1.42556	0.7	0.870445	0.768238	0.2	0.301331
B2RX12	Abcc3	MRP3	3780.12	5033.42	5206.06	4686.19	5286.03	5550.71	6412.86	5902.26	5517.52	1.05019	0.4	0.691041	1.17261	0.1	0.178349
E9Q236	Abcc4	E9Q236	455.712	525.418	523.921	468.585	460.454	458.683	549.876	697.788	561.231	0.878862	0.7	0.870445	1.07121	0.1	0.178349
P48410	Abcd1	ABCD1	781.661	876.475	882.473	913.075	611.083	846.39	773.411	763.847	688.72	0.965675	1	1	0.871499	0.1	0.178349
P55096	Abcd3	ABCD3	2418.36	3057.99	3320.84	3317.93	3771	3563.23	4568.11	4508.99	3955.37	1.16522	0.2	0.528743	1.4745	0.1	0.178349
O89016	Abcd4	ABCD4	105.054	133.3	145.88	112.331	119.288	129.372	93.3033	71.9798	103.519	0.894884	0.7	0.870445	0.69995	0.1	0.178349
P61222	Abce1	ABCE1	2154.55	2614.75	2539.68	2497.67	2503.59	2654.93	2596.23	2824.54	2382.72	0.98579	1	1	1.02227	0.7	0.771399
Q6P542	Abcf1	ABCF1	3608.01	3912.83	3888.66	4226.66	3960.38	3909.04	4441.72	5406.34	4384.81	1.01844	0.2	0.528743	1.14222	0.1	0.178349
Q99LE6	Abcf2	ABCF2	5133.89	5809.05	6045.56	5917.85	5819.68	5278.79	6432.5	7420.36	6179.19	1.00183	1	1	1.10732	0.1	0.178349
Q8K268	Abcf3	ABCF3	2601.99	3074.88	2868.17	2764.23	2970.75	2964.68	2968.16	3160.28	3090.47	1.03365	1	1	1.07751	0.2	0.301331
Q7TMS5	Abcg2	ABCG2	570.594	750.824	794.01	822.467	1211.38	1240.93	1260.45	1039.77	1486.06	1.6134	0.1	0.408745	1.67876	0.1	0.178349
Q6PE15	Abhd10	ABHDA	2432.47	2176.31	2058.78	1944.14	2173.57	2163.88	2102.58	2049.83	2145.37	0.994288	0.4	0.691041	0.966122	0.4	0.503145
Q8K4F5	Abhd11	ABHDB	743.271	654.731	640.932	723.071	704.907	722.149	702.336	660.231	742.249	1.10297	0.7	0.870445	1.07271	0.7	0.771399
Q99LR1	Abhd12	ABD12	1049.97	1132.27	1086.22	906.803	950.329	1034.8	965.581	1014.11	1091.42	0.874896	0.1	0.408745	0.933614	0.4	0.503145
Q80UX8	Abhd13	ABHDD	68.8835	80.1801	72.4875	66.0414	75.0633	102.956	77.3465	37.9092	72.072	1.03553	1	1	0.994268	0.7	0.771399
Q922Q6	Abhd14a	ABHEA	39.5678	32.9485	36.8207	53.1982	33.9803	31.7726	38.1929	37.4938	37.0691	0.922859	1	1	1.01828	0.7	0.771399
E9QN99	Abhd14b	E9QN99	4824.79	3832.53	3970.87	4461.71	3740.44	3689.36	3349.58	2597.53	3220.64	0.94197	0.4	0.691041	0.811067	0.1	0.178349
Q9Z1Q2	Abhd16a	ABHGA	949.932	1114.03	1151.31	1051.61	1051.84	1175.64	1188.81	991.621	1069.2	0.944176	1	1	0.959759	1	1
Q99JW1	Abhd17a	AB17A	347.813	393.159	405.598	351.656	429.197	451.768	459.2	544.143	491.605	1.09166	0.4	0.691041	1.2504	0.1	0.178349
Q7M759	Abhd17b	AB17B	29.8784	31.2344	22.7038	26.0254	30.8488	33.371	40.3417	33.0586	43.4822	1.03248	0.7	0.870445	1.3502	0.1	0.178349
Q9QXM0	Abhd2	ABHD2	328.814	467.905	462.624	462.592	564.216	503.79	556.308	372.865	544.464	1.08898	0.4	0.691041	1.1769	0.4	0.503145
Q8VD66	Abhd4	ABHD4	648.919	659.416	586.502	609.578	760.631	700.487	666.596	780.415	788.911	1.07947	0.4	0.691041	1.20264	0.1	0.178349
Q9DBL9	Abhd5	ABHD5	88.9168	128.393	107.338	102.267	99.417	81.4333	106.701	89.2363	108.534	0.926205	0.4	0.691041	0.994065	1	1
Q8R2Y0	Abhd6	ABHD6	1522.66	1866.91	1748.18	1404.97	1305.46	1729.05	1606.17	1898.22	1608.3	0.803676	0.2	0.528743	0.919985	1	1
Q8CBW3	Abi1	ABI1	4848.21	4675.12	4231.7	5769.33	5191.01	4143.32	5169.91	5615.61	5813.62	1.11035	0.7	0.870445	1.20117	0.1	0.178349
P62484	Abi2	ABI2	33.4086	30.1656	25.2717	29.0924	25.7943	23.5795	16.1424	19.1597	21.0762	0.85509	0.4	0.691041	0.635151	0.1	0.178349
Q8BYZ1	Abi3	ABI3	537.459	536.826	407.506	458.124	407.671	354.546	326.895	259.561	325.493	0.75941	0.4	0.691041	0.606329	0.1	0.178349
Q59IW5	Abi3bp	Q59IW5	4311.65	3108.07	3506.76	2434.44	2217.54	2355.99	1139.71	1336.66	1356.41	0.671842	0.1	0.408745	0.381167	0.1	0.178349
P00520	Abl1	ABL1	641.586	698.784	614.323	659.381	673.446	748.389	663.862	595.811	692.462	1.04966	0.4	0.691041	1.03472	1	1
Q8K4G5	Ablim1	ABLM1	4405.92	3814.37	3737.44	4943.16	4499.6	4619.01	4186.79	4022.74	4150.55	1.21095	0.1	0.408745	1.08814	0.7	0.771399
Q8BL65	Ablim2	ABLM2	968.919	713.397	538.278	812.729	555.87	434.838	588.635	520.01	659.289	0.779187	0.7	0.870445	0.825116	0.4	0.503145
P38649	Abo	BGAT	64.2856	92.0803	91.2257	138.653	166.612	115.184	367.244	349.718	348.937	1.51989	0.1	0.408745	3.83355	0.1	0.178349
Q5SSL4	Abr	ABR	2727.09	3311.62	3298.7	3240.26	3622.8	3285.31	4238.45	3908.47	4102.44	0.995941	1	1	1.24365	0.1	0.178349
Q4KML4	Abracl	ABRAL	571.662	571.897	507.222	629.925	454.806	407.69	621.212	457.892	571.45	0.795586	0.7	0.870445	0.999629	1	1
Q99LJ2	Abtb1	ABTB1	32.6595	22.571	32.8528	32.1736	37.9768	32.3015	76.7047	32.3635	54.915	0.989038	1	1	1.68144	0.4	0.503145
Q921H8	Acaa1a	THIKA	7241.74	6429.12	6803.11	7079.79	6437.95	6396.43	6369.52	5351.05	6265.81	0.946325	0.7	0.870445	0.921021	0.1	0.178349
Q8VCH0	Acaa1b	THIKB	47.7191	60.2307	49.984	112.083	111.112	123.342	136.148	91.2307	115.22	2.24238	0.1	0.408745	2.30514	0.1	0.178349
Q8BWT1	Acaa2	THIM	11324.9	9117.02	8956.3	9911.28	9564.92	8761.9	9091	8208.4	8416.77	1.04913	1	1	0.923193	0.2	0.301331
Q5SWU9	Acaca	ACACA	7082.77	8753.81	8469.96	8759.96	8845.9	8720.44	9643.18	9287.01	8436.75	1.03424	0.2	0.528743	1.09646	0.4	0.503145
E9Q4Z2	Acacb	E9Q4Z2	727.5	968.613	840.614	682.341	762.661	846.112	830.476	620.498	660.847	0.907267	0.7	0.870445	0.786148	0.2	0.301331
Q8K370	Acad10	ACD10	2638.52	3436.49	3258.61	2750.53	2850.14	3002.01	3862.37	4158.08	4122.33	0.874649	0.7	0.870445	1.26506	0.1	0.178349
Q80XL6	Acad11	ACD11	2495.04	2971.28	3248.59	2901.94	3511.3	3262.94	4079.42	3901.17	3434.37	1.09816	0.4	0.691041	1.31296	0.1	0.178349
D3Z7X0	Acad12	D3Z7X0	19.3054	28.7138	20.2905	25.9319	27.8721	15.1451	44.6366	26.7795	36.1727	1.27803	1	1	1.78274	0.2	0.301331
Q9D7B6	Acad8	ACAD8	2868.64	3978.48	3514.61	3292.5	3643.19	3626.07	5127.51	4576.88	4472.89	1.03171	1	1	1.30224	0.1	0.178349
Q8JZN5	Acad9	ACAD9	4134.03	4303.15	4863.16	4441.71	4659	4711.35	4958.94	5461.91	4791.7	1.08269	0.7	0.870445	1.1524	0.2	0.301331
P51174	Acadl	ACADL	4476.01	5256.04	5924.34	5066.42	6501.68	6574.91	6217.6	7151.33	6560.94	1.23699	0.4	0.691041	1.24827	0.1	0.178349
P45952	Acadm	ACADM	6430.21	7491.91	6803.59	6767.1	7615.65	7659.32	9186.5	8906.73	9344.5	1.11936	0.4	0.691041	1.35024	0.1	0.178349
Q07417	Acads	ACADS	6155.57	8555.49	7459.17	8060.83	8903.02	8432.44	11931.5	10514	11379.1	1.13048	0.4	0.691041	1.52552	0.1	0.178349
Q9DBL1	Acadsb	ACDSB	1370.42	1780.12	1413.67	1634.26	1399.92	1444.69	1481.07	1147.53	1383.81	1.02194	1	1	0.978878	0.7	0.771399
P50544	Acadvl	ACADV	9451.14	10869.5	11337.5	9514.96	10536.2	11455	11886.8	9938.24	11460.4	0.969336	1	1	1.05436	0.4	0.503145
Q6ZQK5	Acap2	ACAP2	2214.08	2367.3	2271.65	2564.47	2283.52	2272.08	2679.24	2732.15	2373.89	1.00523	0.4	0.691041	1.17942	0.1	0.178349
Q8QZT1	Acat1	THIL	7752.84	6586.58	7248.07	8676.64	7142.18	6697.24	6908.38	6831.48	6886.78	0.985391	1	1	0.950154	0.7	0.771399
Q8CAY6	Acat2	THIC	2185.15	1863.93	2012.11	2065.15	2078.97	2024.77	1834.17	1861.46	1849.2	1.02636	0.7	0.870445	0.919035	0.1	0.178349
Q8BMP6	Acbd3	GCP60	4248.79	4070.8	4183.31	4683.75	4680.98	4704.78	3966.88	4337.39	4043.95	1.11963	0.1	0.408745	0.966687	0.7	0.771399
Q5XG73	Acbd5	ACBD5	2803.8	3030.12	3174.17	3033.55	3402.24	3254.11	3236.92	3043.72	3198.42	1.07392	0.2	0.528743	1.05554	0.2	0.301331
Q9D061	Acbd6	ACBD6	53.4679	52.7178	52.9915	60.8343	49.8938	52.5852	50.1199	53.7833	50.8662	0.992333	0.7	0.870445	0.959894	0.7	0.771399
Q5EE38	Acd	ACD	93.4743	78.3833	84.5651	99.5404	69.4035	78.1512	76.9123	76.6316	82.8592	0.924154	0.7	0.870445	0.909504	0.2	0.301331
P09470	Ace	ACE	1149.99	1542.39	1285.55	1194.62	1170.96	1544.41	1382.55	1393.62	1578.4	0.929268	1	1	1.08407	0.4	0.503145
Q8R4X1	Acer1	ACER1	139.733	168.209	143.773	138.031	236.089	180.452	217.838	94.6207	225.046	1.25512	0.7	0.870445	1.51515	0.7	0.771399
Q9JIX8	Acin1	ACINU	7654.78	6647.7	7491.98	7496.67	7648.97	7955.05	4921.71	3907.07	5088.26	1.02095	0.4	0.691041	0.65693	0.1	0.178349
Q3V117	Acly	Q3V117	15647.3	19333.5	20421.1	19080.5	16596.8	16996.5	20703.6	24393.6	20953.3	0.879122	0.7	0.870445	1.08378	0.1	0.178349
A2AKK5	Acnat1	ACNT1	153.332	205.501	204.737	276.224	285.19	254.623	386.964	436.831	430.549	1.34916	0.1	0.408745	2.10294	0.1	0.178349
P28271	Aco1	ACOC	11544.3	12070.1	11585.1	12523.4	11943.4	12379.3	13390	14628.9	13566	1.06855	0.2	0.528743	1.17099	0.1	0.178349
Q99KI0	Aco2	ACON	22222	21846.4	21670	22777.3	21395.2	19669.9	22276.9	22790.1	23058.8	0.979347	0.7	0.870445	1.0432	0.1	0.178349
O55137	Acot1	ACOT1	1009.27	861.83	784.227	783.967	838.536	933.247	859.019	835.2	850.975	0.972971	0.7	0.870445	0.987405	0.7	0.771399
Q8VHQ9	Acot11	ACO11	2029.21	2674.21	2704.9	2448.39	2355.41	2407.18	2795.87	3368.24	2558.05	0.900146	0.7	0.870445	1.04549	0.4	0.503145
Q9CQR4	Acot13	ACO13	3514.53	3026.7	3267.13	2822.87	2793.05	2586.5	2738.05	2869.27	3113.4	0.854894	0.1	0.408745	0.878223	0.2	0.301331
Q9QYR9	Acot2	ACOT2	3710.4	3368.06	3252.52	2811.03	2705.82	3584.21	2715.84	2957.01	2945.84	0.834614	0.4	0.691041	0.87464	0.1	0.178349
Q8BWN8	Acot4	ACOT4	527.019	681.07	518.97	714.749	759.698	918.593	538.075	615.492	560.508	1.4415	0.1	0.408745	1.06354	0.7	0.771399
Q91V12	Acot7	BACH	3335.49	4557.42	4683.19	3822.77	4173.51	3591.84	5350.41	4500.67	4724.72	0.838801	0.7	0.870445	1.03671	0.4	0.503145
P58137	Acot8	ACOT8	2825.79	2712.1	2374.16	2386.61	2671.3	2887.81	2899	2222.9	2623.01	0.984956	1	1	0.967151	1	1
Q9R0X4	Acot9	ACOT9	5604.58	6425.44	5919.95	6023.7	5752.7	5977.71	5867.16	6991.89	6538.83	1.00976	1	1	1.10454	0.4	0.503145
Q9R0H0-2	Acox1	ACOX1	3655.45	4242.33	3828.54	4685.51	5026.11	5184.47	5709.24	4336.78	4957.42	1.3128	0.1	0.408745	1.29486	0.1	0.178349
Q9EPL9	Acox3	ACOX3	2620.38	3311.86	3305.84	2469.83	3140.26	3335.59	3458.91	2670.45	3343.86	0.949913	1	1	1.0115	0.4	0.503145
Q9D358	Acp1	PPAC	150.976	137.94	126.905	223.342	184.353	139.435	205.047	335.839	306.476	1.33647	0.2	0.528743	2.22181	0.1	0.178349
Q9D358-2	Acp1	PPAC	1531.79	1311.67	1350.09	1489.56	1405.18	1264.53	1237.21	1227.53	1175.69	1.0408	1	1	0.909221	0.1	0.178349
P24638	Acp2	PPAL	1955.68	2245.77	1882.52	2016.79	1838.93	1822.33	2295.45	2080.74	2244.8	0.940302	0.4	0.691041	1.14784	0.4	0.503145
Q05117	Acp5	PPA5	822.966	842.758	799.115	818.884	815.345	661.779	714.825	706.74	806.749	0.99074	0.4	0.691041	0.868596	0.2	0.301331
Q8BP40	Acp6	PPA6	2541.35	2990.48	2666.41	2820.7	3197.78	2827.17	3258.16	3215.57	3080.98	1.06029	0.4	0.691041	1.20596	0.1	0.178349
Q8BHA9	Acpl2	ACPL2	957.094	1017.7	1196.97	995.06	959.454	1239.05	1048.53	1441.08	1115.38	0.977754	1	1	1.09598	0.4	0.503145
Q8VCW8	Acsf2	ACSF2	8857.83	9341.37	8435.85	8219.39	7769.19	9208.38	9725.2	7986.01	9190.84	0.927924	0.4	0.691041	1.0376	1	1
Q3URE1	Acsf3	ACSF3	1550.98	1841.28	1702.62	1610.88	1696.01	1966.34	2076.39	1920.27	2087.62	0.996118	1	1	1.21953	0.1	0.178349
P41216	Acsl1	ACSL1	1795.96	2232.6	2370.76	1760.64	1596.26	1740.91	2077.09	2066.12	1889.1	0.779768	0.1	0.408745	0.925432	0.7	0.771399
Q9CZW4	Acsl3	ACSL3	1681.79	2160.73	2250.59	2129.36	2527.86	2382.96	3051.23	2786.62	3040.31	1.10285	0.4	0.691041	1.40708	0.1	0.178349
Q9QUJ7	Acsl4	ACSL4	2620.44	3020.45	3209.57	2728.13	2258.77	3356.92	3307.58	4568.85	3818.62	0.90322	1	1	1.26425	0.1	0.178349
Q8JZR0	Acsl5	ACSL5	3392.59	4507.35	4429.84	4215.04	4039.65	4486.47	5324.75	4749.48	4835.59	0.951511	1	1	1.0916	0.1	0.178349
Q3UNX5	Acsm3	ACSM3	5938.29	6369.52	6786.7	8480.95	8278.22	7288.36	7823.31	9945.15	8681.29	1.29966	0.1	0.408745	1.36294	0.1	0.178349
Q99NB1	Acss1	ACS2L	3104.03	3489.92	3430.46	3373.18	3497.59	3654.52	3504.03	3155.68	3270.3	1.01957	0.4	0.691041	0.953312	1	1
Q9QXG4	Acss2	ACSA	4011.15	4583.52	4969.47	4360.88	4452.18	4852.03	5713.68	5570.54	5330.25	0.971345	1	1	1.21534	0.1	0.178349
P68134	Acta1	ACTS	48.0078	64.8225	38.9237	51.1948	31.1419	67.003	36.9388	38.8005	38.463	1.06638	1	1	0.801182	0.1	0.178349
P62737	Acta2	ACTA	33696.5	32860.8	32267.3	32428.2	26869.1	28658.1	28372.2	29520.3	26986.2	0.872106	0.2	0.528743	0.863406	0.1	0.178349
P60710	Actb	ACTB	125938	117643	123257	112680	89891.1	110107	109148	132297	116253	0.893312	0.1	0.408745	0.943176	0.7	0.771399
E9Q5F4	Actb	E9Q5F4	1512.87	1455.48	1639.75	1949.7	1301.1	1342.01	1971.01	1628.06	1162.96	0.887062	0.7	0.870445	1.07614	1	1
Q8BFZ3	Actbl2	ACTBL	555.484	569.967	768.762	899.837	1070.61	856.677	1863.25	7564.8	1606.93	1.57875	0.1	0.408745	3.26905	0.1	0.178349
Q9Z2N8	Actl6a	ACL6A	1816.83	2002.59	1725.06	2079.21	1777.83	1644.28	1971.81	1857.51	2021.19	0.978534	1	1	1.0853	0.4	0.503145
A1BN54	Actn1	A1BN54	1458.9	1561.57	1802.23	1613.23	886.254	1121.73	1821.12	2283.32	1859.51	0.718335	0.4	0.691041	1.1908	0.1	0.178349
Q7TPR4	Actn1	ACTN1	27951.7	29960.1	34306	24550.8	24843.4	27785.1	28860.2	33294.9	30038.1	0.829216	0.1	0.408745	1.0026	1	1
Q9JI91	Actn2	ACTN2	73.6413	90.8757	98.743	107.522	91.6929	81.184	101.065	102.268	106.713	1.00899	0.7	0.870445	1.12536	0.1	0.178349
P57780	Actn4	ACTN4	21049.7	22353.4	24064.2	22463.2	25233.5	25420.7	27928.9	31199	31037.2	1.12884	0.2	0.528743	1.38848	0.1	0.178349
Q9QZB7	Actr10	ARP10	2144.7	2470.9	2570	2182.37	2118.05	2337.25	2796.03	2203.67	2219.36	0.883229	0.4	0.691041	0.898199	1	1
P61164	Actr1a	ACTZ	9783.1	10951.8	10896.4	11153	10574.2	10312	12290.1	13718.5	12437.2	0.970431	1	1	1.14141	0.1	0.178349
Q8R5C5	Actr1b	ACTY	1173.95	1243.21	1246.04	1307.71	1334.75	1328.64	1460.47	1613.53	1450.15	1.06872	0.1	0.408745	1.17476	0.1	0.178349
P61161	Actr2	ARP2	7860.26	9309.78	8834.35	8589.63	8720.9	8644.58	10317.1	9229.35	10368.6	0.978519	0.7	0.870445	1.16784	0.2	0.301331
Q99JY9	Actr3	ARP3	10098.8	10058.5	9681.67	10247	10018.7	9628.5	10409	9388.25	9643.45	0.996043	1	1	0.958736	0.7	0.771399
Q80US4	Actr5	ARP5	903.752	789.271	756.243	875.204	884.538	785.682	817.925	848.733	813.247	1.10888	1	1	1.0363	0.7	0.771399
Q9D864	Actr6	ARP6	552.379	741.286	544.154	742.051	676.713	711.044	621.026	565.371	608.058	1.28724	0.4	0.691041	1.1008	0.7	0.771399
Q8R2S9	Actr8	ARP8	303.705	289.826	291.947	372.671	396.346	363.39	326.422	339.662	355.483	1.2765	0.1	0.408745	1.16344	0.1	0.178349
Q61271	Acvr1b	ACV1B	112.753	164.416	167.434	155.111	174.091	171.615	242.241	160.076	234.725	1.04378	0.4	0.691041	1.42763	0.4	0.503145
P27038	Acvr2a	AVR2A	367.361	403.827	445.297	384.245	500.645	611.681	513.505	444.208	466.682	1.23975	0.4	0.691041	1.15565	0.2	0.301331
Q99JW2	Acy1	ACY1	5181.24	4235.83	4171.46	3954.83	4077.63	4599.31	3848.63	3913.77	4190.44	0.962652	0.4	0.691041	0.923968	0.2	0.301331
Q91XE4	Acy3	ACY3	780.343	830.371	722.893	848.561	1040.48	937.222	1057.88	843.136	943.386	1.20104	0.1	0.408745	1.20894	0.1	0.178349
P56376	Acyp1	ACYP1	1115.34	978.222	906.921	1029.21	846.158	733.414	550.667	484.771	597.749	0.864996	0.4	0.691041	0.562926	0.1	0.178349
P56375	Acyp2	ACYP2	1683.97	1562.15	1333.22	1389.2	1165.54	1358.7	1291.81	1336.74	1489.2	0.869763	0.4	0.691041	0.855705	0.4	0.503145
P03958	Ada	ADA	6115.54	4855.46	5134.37	4960.68	4324.98	3905.14	3965.28	3743.05	4137.5	0.842358	0.2	0.528743	0.772301	0.1	0.178349
Q80SY6	Adal	ADAL	350.497	413.088	360.391	511.674	333.371	325.806	356.891	334.07	388.038	0.925026	0.7	0.870445	0.990288	0.7	0.771399
O35598	Adam10	ADA10	1865.21	2036.41	1795.2	1969.29	2023.9	2119.76	2309.02	2293.92	2090.51	1.08508	0.4	0.691041	1.22985	0.1	0.178349
O88839	Adam15	ADA15	58.453	49.6258	44.0988	51.7546	37.5493	45.7483	33.7387	38.7654	36.2366	0.921865	0.7	0.870445	0.730197	0.1	0.178349
Q9Z0F8	Adam17	ADA17	588.044	528.444	523.253	607.995	661.848	677.712	498.836	485.395	534.005	1.25245	0.1	0.408745	0.943971	0.4	0.503145
Q61072	Adam9	ADAM9	162.241	168.894	180.322	170.001	167.162	162.125	179.959	150.14	137.05	0.989745	0.7	0.870445	0.88896	0.4	0.503145
Q9R0X2	Adamdec1	ADEC1	625.854	787.019	654.901	540.16	643.74	692.952	758.206	556.099	505.531	0.982958	0.7	0.870445	0.849134	0.4	0.503145
P97857	Adamts1	ATS1	69.4677	48.4694	43.3504	46.6594	56.9887	47.8991	28.0144	31.1788	30.5075	0.988234	1	1	0.629418	0.1	0.178349
Q80T21	Adamtsl4	ATL4	148.312	142.245	141.773	168.212	144.034	161.226	102.181	115.995	109.676	1.13344	0.2	0.528743	0.771036	0.1	0.178349
D3Z689	Adamtsl5	D3Z689	44.5287	39.7885	33.7139	57.9419	53.3807	52.3955	58.138	46.5189	64.521	1.34161	0.1	0.408745	1.46118	0.1	0.178349
E9PY16	Adap1	E9PY16	1728.31	1966.74	1698.62	1909.31	2174.97	1951.31	2471.93	2556.31	2522.47	1.12903	0.4	0.691041	1.4595	0.1	0.178349
Q99MU3	Adar	DSRAD	2178.46	2429.64	2332.93	2645.05	2712.38	2673.57	2718.93	2849.05	2695.02	1.14601	0.1	0.408745	1.16546	0.1	0.178349
Q9JHI2	Adat1	ADAT1	490.97	594.925	508.433	565.582	418.647	386.467	561.624	357.917	338.83	0.823406	0.4	0.691041	0.703961	0.4	0.503145
Q6P6J0	Adat2	ADAT2	398.256	318.237	290.838	302.975	360.338	312.618	246.068	262.976	240.944	0.982343	1	1	0.773222	0.1	0.178349
Q6PAT0	Adat3	ADAT3	219.304	191.207	170.478	248.649	192.121	228.096	212.665	208.772	213.795	1.19293	0.2	0.528743	1.11222	0.7	0.771399
Q9D0L4	Adck1	ADCK1	114.592	168.924	169.819	161.345	132.12	145.213	291.961	321.57	286.663	0.859635	0.7	0.870445	1.72836	0.1	0.178349
Q60936	Adck3	ADCK3	631.388	668.412	629.914	459.394	524.607	637.395	404.243	351.425	402.276	0.830879	0.4	0.691041	0.63713	0.1	0.178349
Q566J8	Adck4	ADCK4	632.062	710.007	676.162	762.688	679.562	674.874	839.448	863.472	801.598	1.00503	0.7	0.870445	1.24149	0.1	0.178349
E0CXW2	Adck5	E0CXW2	579.194	669.618	707.723	594.409	723.188	757.833	792.322	707.273	728.416	1.08	0.4	0.691041	1.08781	0.2	0.301331
P84309	Adcy5	ADCY5	521.674	615.131	596.997	445.417	544.266	645.705	570.591	469.525	561.701	0.911673	1	1	0.940877	0.4	0.503145
Q01341	Adcy6	ADCY6	388.164	441.524	440.797	420.013	442.886	454.3	484.133	389.137	453.014	1.00474	0.4	0.691041	1.02772	0.4	0.503145
P51830	Adcy9	ADCY9	720.4	782.119	741.677	732.068	738.297	766.511	898.823	1013.89	852.802	0.995443	1	1	1.21188	0.1	0.178349
Q9QYC0	Add1	ADDA	6697.75	6354.18	6149.66	6488.5	5722.6	6512.15	4216.6	4617.45	4243.85	1.02114	1	1	0.667883	0.1	0.178349
Q9QYB8	Add2	ADDB	253.402	222.152	173.491	141.697	136.771	137.816	111.952	109.883	116.53	0.620368	0.1	0.408745	0.503943	0.1	0.178349
Q9QYB5-2	Add3	ADDG	7991.6	7572.79	7050.11	7332.88	6122.06	7667.83	3695.71	3608.29	3809.39	0.968319	0.7	0.870445	0.488025	0.1	0.178349
Q9QYB5	Add3	ADDG	283.409	246.556	198.862	273.877	276.108	351.842	143.875	99.1746	116.147	1.11986	0.4	0.691041	0.471078	0.1	0.178349
P00329	Adh1	ADH1	10988.9	13848.8	13753.1	9260.15	9497.28	10105	7670.89	9580	8607.22	0.690556	0.1	0.408745	0.625839	0.1	0.178349
P28474	Adh5	ADHX	4509.23	5272.62	5786.43	4497.36	4145.38	4589.45	5301.22	3372.28	4192.09	0.852965	0.2	0.528743	0.795068	0.4	0.503145
E9Q4Y1	Adh6a	E9Q4Y1	292.918	349.758	199.641	657.481	462.792	307.106	614.024	266.641	476.217	1.57994	0.2	0.528743	1.62577	0.4	0.503145
Q99JT9	Adi1	MTND	2608.69	2090.52	1645.06	1941.85	2008.85	2716.74	2273.34	2720.35	2621	0.960933	1	1	1.25375	0.2	0.301331
Q60994	Adipoq	ADIPO	846.099	870.201	895.021	673.754	715.658	638.098	691.261	418.423	594.511	0.774251	0.1	0.408745	0.683188	0.1	0.178349
Q8BQS5	Adipor2	ADR2	84.4103	129.676	100.511	105.867	157.457	153.536	247.486	116.692	207.795	1.52755	0.2	0.528743	2.06739	0.2	0.301331
P55264	Adk	ADK	4810.77	5057.07	4974.16	5290.07	5906.77	4601.88	5776.27	5236.2	5019.75	1.06351	0.7	0.870445	1.05268	0.2	0.301331
A2BDX0	Adnp	A2BDX0	4082.34	4319.48	3905.37	4697.76	4325.02	4310.12	3656.19	3153.55	3423.57	1.05945	0.2	0.528743	0.838629	0.1	0.178349
Q6PDY2	Ado	AEDO	1933.34	1653.72	1514.78	1734.56	1451.78	2126.36	1462.19	1961.49	1646.11	1.04888	1	1	0.995398	1	1
Q8VDL4	Adpgk	ADPGK	1023.26	1095.02	1104.6	990.721	936.772	1055.88	1184.32	1324.59	1171.58	0.904752	0.2	0.528743	1.08155	0.1	0.178349
P54923	Adprh	ADPRH	4692.89	4227.66	4013.19	4387.82	3846.2	4260.18	3601.55	3054.37	3607.28	1.00769	1	1	0.851902	0.1	0.178349
Q8CG72	Adprhl2	ARHL2	2128.24	2208.01	1939.39	2153.85	1816.04	1845.32	2107.44	2333.69	2095.83	0.867064	0.4	0.691041	0.990227	1	1
Q99KS6	Adprm	ADPRM	64.0077	60.7253	55.4439	65.1119	71.5918	72.6653	58.9309	45.1534	73.844	1.17894	0.1	0.408745	0.970451	1	1
Q99MK8	Adrbk1	ARBK1	1784.24	2054	2147	1863.26	1944.27	1809.63	2310.96	2756.12	2130.81	0.907137	0.7	0.870445	1.1251	0.2	0.301331
Q9JKV1	Adrm1	ADRM1	1556.38	1540.38	1498.55	1510.62	1350.12	1399.22	1332.92	996.781	1068.54	0.90836	0.2	0.528743	0.693686	0.1	0.178349
P54822	Adsl	PUR8	3934.74	4341.17	4378.47	4024.61	4222.12	4305.91	4879.42	5461.8	5169.47	0.972577	0.7	0.870445	1.1908	0.1	0.178349
P46664	Adss	PURA2	4078.38	3801.67	3963.92	4293.51	3905.49	3921.55	4143.62	3951.96	3836.63	0.989311	1	1	0.996983	1	1
P28650	Adssl1	PURA1	309.098	374.027	382.896	315.17	234.625	173.508	219.689	227.895	255.997	0.627294	0.2	0.528743	0.609301	0.1	0.178349
Q640N1	Aebp1	AEBP1	1482.29	1234.43	1178.73	1170.16	1038.21	1255.36	1092	1168.03	1203.91	0.947935	0.4	0.691041	0.94621	0.2	0.301331
P63002	Aes	AES	741.743	686.981	586.025	752.614	711.461	655.582	580.26	506.543	556.81	1.03563	0.7	0.870445	0.810517	0.1	0.178349
Q80YS6	Afap1	AFAP1	761.774	853.026	781.93	675.734	658.188	689.864	637.003	482.986	539.573	0.864187	0.1	0.408745	0.690053	0.1	0.178349
Q5DTU0	Afap1l2	AF1L2	547.889	557.97	532.169	699.05	605.052	568.097	657.736	644.702	639.652	1.10433	0.1	0.408745	1.1767	0.1	0.178349
Q9ESC8	Aff4	AFF4	348.866	408.352	405.581	455.562	504.223	481.591	481.512	417.031	507.513	1.18741	0.1	0.408745	1.18721	0.1	0.178349
Q920A7	Afg3l1	AFG31	1007.86	1044.75	1060.47	1273.43	1257.84	1088.11	1767.56	1663.85	1624.21	1.20396	0.1	0.408745	1.59258	0.1	0.178349
Q8JZQ2	Afg3l2	AFG32	5456.4	5459.76	5505.95	6295.67	6134.52	5741.95	8004.22	8862.58	8074.27	1.12359	0.1	0.408745	1.47887	0.1	0.178349
O89020	Afm	AFAM	1867.95	1353.07	1505.54	1288.37	1223.51	1436.1	1226.42	962.229	1153.29	0.855753	0.2	0.528743	0.766031	0.1	0.178349
Q8K4H1	Afmid	KFA	24.7146	23.5906	23.4967	15.0128	24.9953	22.9897	31.0445	20.7395	17.8097	0.974528	0.7	0.870445	0.879143	0.7	0.771399
Q80WT5	Aftph	AFTIN	2683.54	2429.35	2186.56	2878.17	2748.35	2411.3	2135.07	1906.83	2074.59	1.13131	0.4	0.691041	0.853969	0.1	0.178349
Q3UPL5	Ag2	CK096	327.964	297.846	278.723	294.697	328.544	275.969	225.79	176.622	225.956	0.989427	1	1	0.758076	0.1	0.178349
Q64191	Aga	ASPG	37.4613	26.0666	18.7137	28.0722	43.2043	24.4745	26.3761	36.288	19.0487	1.07694	0.7	0.870445	1.01187	1	1
Q8BXK8	Agap1	AGAP1	180.728	257.851	232.135	226.939	197.027	183.317	317.278	247.48	275.283	0.84876	0.7	0.870445	1.18588	0.2	0.301331
Q8VHH5	Agap3	AGAP3	200.423	193.263	190.681	209.21	225.255	199.66	208.563	174.249	202.994	1.08251	0.2	0.528743	1.05035	0.7	0.771399
Q8K2K6	Agfg1	AGFG1	801.583	755.502	709.624	860.001	951.365	922.76	620.897	544.156	658.122	1.22139	0.1	0.408745	0.821834	0.1	0.178349
Q80WC7	Agfg2	AGFG2	289.054	316.301	285.521	276.517	288.063	277.586	200.949	190.909	229.812	0.960326	0.2	0.528743	0.695195	0.1	0.178349
Q9ESW4	Agk	AGK	1923.03	2079.08	2138.86	2166.41	1859.26	1937.97	2280.64	2334.02	2206.37	0.932129	1	1	1.09695	0.1	0.178349
F8VPN4	Agl	F8VPN4	4774.52	5591.82	5993.58	4854.45	4660.39	5351.13	5538.4	6402.53	5456.31	0.868134	0.4	0.691041	0.990447	1	1
Q8CJG1	Ago1	AGO1	835.413	914.2	989.395	787.036	876.005	906.161	795.39	962.887	811.323	0.95822	0.4	0.691041	0.887468	0.4	0.503145
Q8CJG0	Ago2	AGO2	3618.77	4383.61	4349.09	3755.22	4296.05	4397.41	4734.3	5423.85	4980.5	0.987804	1	1	1.14518	0.1	0.178349
Q8CJF9	Ago3	AGO3	611.475	698.881	640.804	617.686	567.887	539.337	634.032	712.427	644.297	0.88621	0.2	0.528743	1.00545	0.7	0.771399
O35083	Agpat1	PLCA	429.954	473.428	535.706	377.555	416.693	449.767	490.416	491.76	427.427	0.880161	0.2	0.528743	1.03588	1	1
Q8K3K7	Agpat2	PLCB	767.143	997.468	1045.95	1276.57	1546.15	1369.95	2293.31	2688.89	2011.61	1.37343	0.1	0.408745	2.29913	0.1	0.178349
Q9D517	Agpat3	PLCC	516.283	669.677	563.597	456.479	524.971	539.274	540.429	411.342	596.785	0.931465	0.4	0.691041	0.958893	0.7	0.771399
Q8K4X7	Agpat4	PLCD	935.004	1276	1295.44	938.434	1030.11	1185.22	1133.46	898.254	1108.19	0.807296	0.7	0.870445	0.868487	0.4	0.503145
Q9D1E8	Agpat5	PLCE	818.565	955.115	886.668	1128.71	969.691	870.675	1389.83	1755.08	1581.09	1.09363	0.4	0.691041	1.78318	0.1	0.178349
Q8C0N2	Agpat9	GPAT3	175.683	255.196	268.134	207.737	328.472	300.953	364.677	227.046	332.088	1.1793	0.4	0.691041	1.30131	0.4	0.503145
Q8C0I1	Agps	ADAS	2558.81	2806.83	2880.61	3508.55	3251.93	3337.17	4360.62	4723.56	4326.27	1.18895	0.1	0.408745	1.55357	0.1	0.178349
O88312	Agr2	AGR2	23618.5	23770.4	24219.1	23585.8	23741.3	19820.8	23904	24965	22183.5	0.992234	0.2	0.528743	1.00562	1	1
Q8R3W7	Agr3	AGR3	369.784	311.312	245.871	391.162	469.769	366.657	422.083	375.152	366.122	1.25649	0.2	0.528743	1.20507	0.2	0.301331
M0QWP1	Agrn	M0QWP1	3656.51	4084.29	3268.72	3527.53	3100.43	3430.19	3770.04	3258.24	3467.26	0.938105	0.4	0.691041	0.948243	0.7	0.771399
Q3UTR7	Agt	Q3UTR7	1280.16	1085.7	804.393	952.758	773.431	912.544	757.224	622.42	656.375	0.840512	0.4	0.691041	0.604564	0.1	0.178349
Q9WVK0	Agtrap	ATRAP	70.4996	80.0723	84.8311	57.9333	96.3962	101.827	59.1335	34.4741	50.5422	1.20386	0.7	0.870445	0.631207	0.1	0.178349
Q8CJF7	Ahctf1	ELYS	3746.09	3767.28	3687.14	4777.45	4224.04	4181.41	4516.66	4495.6	4211.22	1.12759	0.1	0.408745	1.20008	0.1	0.178349
P50247	Ahcy	SAHH	11909.3	14027.9	13562.5	13156.9	12916.2	14921.9	17417.2	13066.7	15484.1	0.970094	1	1	1.14169	0.4	0.503145
Q80SW1	Ahcyl1	SAHH2	4247.28	5238.94	5550.96	4658.68	5412.46	6317.59	6051.41	5327.78	5275.16	1.03312	0.7	0.870445	1.01696	0.4	0.503145
Q68FL4	Ahcyl2	SAHH3	2866.45	3704.1	3905.6	3659.68	3806.29	4213.82	4850.93	4226.71	4012.41	1.02759	0.7	0.870445	1.14109	0.1	0.178349
D3YX97	Ahcyl2	D3YX97	49.8992	53.2913	54.281	51.9865	76.1231	66.3158	97.3794	60.246	67.7745	1.2444	0.4	0.691041	1.27177	0.1	0.178349
Q6PAL7	Ahdc1	AHDC1	364.794	328.431	268.423	367.275	436.223	414.6	229.05	235.453	235.072	1.26237	0.1	0.408745	0.715742	0.1	0.178349
E9Q616	Ahnak	E9Q616	228512	178394	187582	228990	219748	216412	151824	218224	185277	1.17148	0.4	0.691041	0.987712	0.7	0.771399
E9PYB0	Ahnak2	E9PYB0	1251.89	1141.58	1152.44	1130.8	1074.64	1016.77	690.628	825.401	782.479	0.932491	0.1	0.408745	0.678976	0.1	0.178349
F7DBB3	Ahnak2	F7DBB3	6617.16	4894.68	5642.54	5065.59	5009.95	5098.6	2475.49	3369.8	3175.92	0.89775	0.7	0.870445	0.562853	0.1	0.178349
F7CVJ5	Ahnak2	F7CVJ5	48.8222	30.6702	31.5038	42.4677	35.8647	41.9449	10.9813	16.5745	10.4528	1.33142	0.7	0.870445	0.348571	0.1	0.178349
P30561	Ahr	AHR	64.0128	70.3205	70.1338	73.3079	73.9622	66.4197	70.2646	69.9797	66.4708	1.04526	0.4	0.691041	0.997803	1	1
Q8BK64	Ahsa1	AHSA1	3688.45	3676.09	3486.49	4041.67	3749.6	3438.86	3623.36	3452.43	3432.54	1.02	0.7	0.870445	0.939158	0.2	0.301331
Q8N9S3	Ahsa2	AHSA2	970.043	1185.43	1079.01	1020.55	1079.08	970.255	1111.02	873.186	991.706	0.945821	1	1	0.919089	0.7	0.771399
P29699	Ahsg	FETUA	4568.76	2718.13	2726.54	2588.87	2361.85	2641.81	2143.22	1553.51	1575.01	0.949507	0.1	0.408745	0.577659	0.1	0.178349
P12763	AHSG	FETUA	77.097	17.6698	97.1685	18.4425	95.4472	107.999	25.2201	105.422	17.609	1.23801	0.7	0.870445	0.327122	1	1
Q3UW98	AI747448	Q3UW98	1264.37	1017.43	869.408	1607.6	1557.07	1636.13	753.206	982.394	942.63	1.58006	0.1	0.408745	0.926481	0.4	0.503145
Q8C4Q6	Aida	AIDA	640.378	559.467	496.518	561.982	519.741	532.499	430.313	375.73	437.366	0.951797	1	1	0.769148	0.1	0.178349
O70200	Aif1	AIF1	1350.5	1376.99	1445.58	1016.04	1160.55	1167.3	883.731	737.264	1010.2	0.842817	0.1	0.408745	0.641785	0.1	0.178349
Q9Z0X1	Aifm1	AIFM1	7706.96	8744.81	8610.16	8078	7888.56	8656.04	8726.56	9139.35	10136.4	0.938194	1	1	1.06146	0.2	0.301331
Q8BUE4	Aifm2	AIFM2	260.726	376.398	345.456	254.831	276.733	289.073	337.8	342.011	300.812	0.801066	0.4	0.691041	0.977838	0.7	0.771399
E9PVP1	Aim1	E9PVP1	3465.69	3639.68	3366.58	4986.36	5327.22	5017.33	5197.92	5228.81	5257.67	1.44772	0.1	0.408745	1.50874	0.1	0.178349
B7ZCC2	Aim1l	B7ZCC2	1847.62	2202.26	1761.98	2575.72	2771.39	2686.36	2905.38	2412.73	2694.56	1.45396	0.1	0.408745	1.4584	0.1	0.178349
Q91VJ1	Aim2	AIM2	1453.45	1695.58	1650.5	1903.46	1782.9	1671.89	2247.92	2588.96	2162.1	1.08022	0.2	0.528743	1.36196	0.1	0.178349
P31230	Aimp1	AIMP1	6107.82	5298.18	5778.86	6485.05	5762.57	5384.18	5273.36	4291.15	4958.03	0.997181	1	1	0.85796	0.1	0.178349
Q8R010	Aimp2	AIMP2	365.789	426.292	522.286	434.23	488.529	489.587	512.409	508.254	508.613	1.146	0.7	0.870445	1.19311	0.7	0.771399
O08915	Aip	AIP	4693.68	3938.88	4070.89	4199.72	3943.65	3485.07	3227.08	3119.97	3198.81	0.968744	0.7	0.870445	0.785777	0.1	0.178349
Q9R0Y5	Ak1	KAD1	4566.11	3655.21	3863.3	3092.8	2849.94	2932.29	2072.58	2461.34	2553.55	0.759012	0.1	0.408745	0.637108	0.1	0.178349
Q9WTP6	Ak2	KAD2	11029.9	9595.18	9434.46	11227.4	10659.6	10445.1	10593.8	10110.7	10482.2	1.11093	0.4	0.691041	1.09244	0.7	0.771399
Q9WTP7	Ak3	KAD3	12259.8	10205.9	10220.5	10019.1	10084.6	11033.7	8619.82	9619.08	10212.4	0.986703	0.4	0.691041	0.941156	0.2	0.301331
Q9WUR9	Ak4	KAD4	1883.21	1443.88	1680.74	1439.91	1303.52	1257.91	1050.62	1011.39	1011.06	0.775563	0.1	0.408745	0.601753	0.1	0.178349
Q8VCP8	Ak6	KAD6	349.54	364.403	314.918	363.242	396.921	366.431	309.169	306.186	336.2	1.04832	0.2	0.528743	0.884502	0.2	0.301331
O08715	Akap1	AKAP1	4879.41	4770.38	4466.5	5566.56	5116.41	5386.88	4502.21	3479.49	4092.21	1.12923	0.1	0.408745	0.857837	0.2	0.301331
O88845	Akap10	AKA10	1093.83	1200.5	1202.75	1206.11	1280.02	1219.21	1412.04	1471.45	1318.81	1.01558	0.1	0.408745	1.17621	0.1	0.178349
E9Q774	Akap11	E9Q774	401.824	443.545	405.752	466.969	427.774	443.442	438.196	299.613	366.072	1.09289	0.4	0.691041	0.902206	0.4	0.503145
Q9WTQ5	Akap12	AKA12	15175.4	11746.8	11866.9	11321.9	12082.7	11976.5	7130.88	5857.28	6893.4	1.00924	1	1	0.580893	0.1	0.178349
E9Q474	Akap13	E9Q474	5770.42	4963.25	4898.6	5759.58	6535.77	6215.26	4946.88	4324.15	4729.7	1.25226	0.2	0.528743	0.952944	0.2	0.301331
O54931-2	Akap2	AKAP2	3526.09	3115.35	3043.92	3307.21	3116.88	3059.51	1572.76	1654.3	1677.21	1.00049	1	1	0.531016	0.1	0.178349
Q7TN79	Akap7	AKA7G	1747.13	1718.46	1512.81	1891.73	2072.06	1763.04	1785.1	1827.73	1821.49	1.10083	0.1	0.408745	1.05995	0.1	0.178349
Q9DBR0	Akap8	AKAP8	5938.4	5054	5031.54	5675.84	5953.76	5351.78	4489.66	3814.36	4478.6	1.12304	0.4	0.691041	0.88615	0.1	0.178349
Q9R0L7	Akap8l	AKP8L	417.454	471.012	456.567	482.174	460.444	427.722	341.191	275.628	333.599	1.00849	0.7	0.870445	0.730668	0.1	0.178349
E9QQ10	Akap9	E9QQ10	14897.4	14931.1	14847.4	17201.3	15814.5	15513.7	16778.5	15162	16194.6	1.06156	0.1	0.408745	1.08708	0.1	0.178349
B1AXD8	Akirin2	AKIR2	189.56	154.67	154.724	141.158	170.812	140.616	148.369	138.76	134.728	0.912321	0.4	0.691041	0.896823	0.1	0.178349
Q9JII6	Akr1a1	AK1A1	10658.1	9467.03	9249.31	9588.83	9603.43	10234.6	8963.4	10325.2	9459.03	1.01441	0.7	0.870445	0.999155	0.7	0.771399
P45376	Akr1b1	ALDR	12761.8	13537.4	13023.8	11812.3	12373.2	11462.1	13032.5	11749.4	12851	0.906978	0.1	0.408745	0.986732	0.7	0.771399
G5E895	Akr1b10	G5E895	310.146	464.142	422.553	290.29	345.9	285.741	406.509	251.027	340.171	0.686991	0.2	0.528743	0.805037	0.4	0.503145
P21300	Akr1b7	ALD1	3083.32	3209.36	3558.37	2953.49	3117.04	3625.32	4065.51	4335.19	4548.73	0.971234	1	1	1.3508	0.1	0.178349
P45377	Akr1b8	ALD2	1711.61	1635.45	1841.44	1806.23	2438.65	1986.68	2643.21	2072.36	2359.8	1.16071	0.2	0.528743	1.3787	0.1	0.178349
Q9JLI0	Akr1c12	Q9JLI0	2850.78	2905.6	2908.12	3200.49	3762.18	3324.26	3974.99	4369.01	3863.77	1.14409	0.1	0.408745	1.36804	0.1	0.178349
Q8VC28	Akr1c13	AK1CD	7598.14	7893.87	7854.61	8355.56	9984.69	10257.2	12153.6	12888.4	12379.5	1.27119	0.1	0.408745	1.57608	0.1	0.178349
Q91WT7	Akr1c14	Q91WT7	2080.79	2463.01	2528.67	1842.34	1874.11	2275.83	1710.12	1500.69	1709.34	0.760902	0.2	0.528743	0.694004	0.1	0.178349
Q8K023	Akr1c18	AKC1H	2271.1	2260.21	2406.86	2858.1	2715.15	3151.54	3412.5	2263.02	2421.86	1.25846	0.1	0.408745	1.06638	0.4	0.503145
G3X9Y6	Akr1c19	G3X9Y6	2242.26	2103.23	2413.97	3528.9	5263.99	2239.15	8206.45	8424.22	6393.01	1.57381	0.4	0.691041	3.6599	0.1	0.178349
P70694	Akr1c6	DHB5	40.8988	46.3327	42.3095	37.3244	58.4144	44.3131	69.0269	55.201	57.7332	1.04736	1	1	1.36454	0.1	0.178349
Q9DCT1	Akr1e2	AKCL2	2868.39	3337.08	3004.29	3161.58	3630.81	3114.66	3814.55	3287.61	3768.02	1.05235	0.4	0.691041	1.25421	0.2	0.301331
Q8CG76	Akr7a2	ARK72	1422.72	1519.74	1414.17	1373.92	1309.49	1630.35	1635.48	1624.66	1662.87	0.9657	0.7	0.870445	1.14955	0.1	0.178349
P31750	Akt1	AKT1	1674.92	1877.22	1853.61	1685.74	2174.51	2286.65	2087.57	1772.97	1985.98	1.17312	0.4	0.691041	1.07141	0.4	0.503145
Q9D1F4	Akt1s1	AKTS1	1497.43	1118.8	1284.95	1354.75	1514.93	1272.87	1092.47	1235.44	1012.01	1.05432	0.7	0.870445	0.850204	0.2	0.301331
Q60823	Akt2	AKT2	521.083	580.785	576.142	503.006	473.161	530.862	558.113	463.586	551.713	0.873059	0.2	0.528743	0.957599	0.4	0.503145
Q64362	Aktip	AKTIP	106.534	123.431	118.921	119.752	124.75	147.731	144.534	83.4243	130.031	1.04902	0.2	0.528743	1.09342	0.7	0.771399
P10518	Alad	HEM2	1614.86	1545.03	1337.69	1746.49	1397.62	1331.2	1398.05	1391.16	1306.28	0.904591	1	1	0.90041	0.4	0.503145
Q8VC19	Alas1	HEM1	1167.96	1367.5	1353.86	1474.95	1275.23	1162.18	1487.62	1558.3	1534.65	0.941922	1	1	1.13354	0.1	0.178349
P07724	Alb	ALBU	42496.1	30632.6	35152.8	28612.5	24266	37152.7	24717.1	26004.4	25254.6	0.813947	0.4	0.691041	0.718424	0.1	0.178349
P02768	ALB	ALBU	134.573	78.9884	103.416	156.559	575.319	94.0412	54.1191	113.618	40.3104	1.51388	0.4	0.691041	0.523315	0.4	0.503145
P02769	ALB	ALBU	2959.62	2116.36	3319.91	1923.87	2987.18	2529.72	2275.15	3642.6	1903.89	0.854745	0.7	0.870445	0.76873	1	1
Q61490	Alcam	CD166	2515.95	2030.51	1968.43	2144.97	1709.29	1807.11	1396.38	1742.35	1611.18	0.889978	0.4	0.691041	0.793485	0.1	0.178349
Q571I9	Aldh16a1	A16A1	3070.67	3017.33	2950.19	3094.25	2743.01	3222.06	3297.47	2846.89	3115.24	1.02549	0.7	0.870445	1.03245	0.7	0.771399
Q9Z110-2	Aldh18a1	P5CS	3893.32	5273.63	5173.05	4298.33	4474.23	5018.15	6368.02	5631.45	5712.57	0.864911	0.7	0.870445	1.10429	0.1	0.178349
Q9Z110	Aldh18a1	P5CS	109.693	120.373	136.705	105.58	145.797	131.741	171.527	138.522	138.78	1.09444	1	1	1.15292	0.1	0.178349
P24549	Aldh1a1	AL1A1	6911.26	8312.47	7925.47	5934.04	5696.01	6917.99	5797.15	5047.81	5546.33	0.74873	0.2	0.528743	0.699811	0.1	0.178349
Q62148	Aldh1a2	AL1A2	2352.54	1765.65	1668.78	2403.2	2134.83	2224.46	2098.52	2061.99	2669.25	1.25985	0.4	0.691041	1.18853	0.4	0.503145
Q9JHW9	Aldh1a3	AL1A3	1897.45	2044.25	1766.55	1722.97	2173.54	1939.87	2472.14	2329.86	2465.21	1.02236	1	1	1.29922	0.1	0.178349
O35945	Aldh1a7	AL1A7	6775.77	7812.51	7323.41	6989.04	6661.63	8376.51	7334.27	5817.42	5610.67	0.954342	1	1	0.794359	0.4	0.503145
Q9CZS1	Aldh1b1	AL1B1	20586.3	20658.3	20338.8	17467.2	15699.6	17581.4	15695.1	13329.5	14890.4	0.848487	0.1	0.408745	0.723316	0.1	0.178349
G3UYH1	Aldh1b1	G3UYH1	2873.69	2633.85	2637.31	2082.1	2174.72	2361.9	1775.12	1182.68	1682.29	0.824598	0.1	0.408745	0.637881	0.1	0.178349
Q8R0Y6	Aldh1l1	AL1L1	15164.3	16277.9	17771.7	17187.8	14101.4	17726.8	14753.8	20328.7	14575.8	1.0559	1	1	0.90637	0.7	0.771399
Q8K009	Aldh1l2	AL1L2	1522.74	1918.02	1612.87	1586.79	1487.46	1347.8	1890.32	2052.1	1686.75	0.922244	0.2	0.528743	1.17202	0.4	0.503145
P47738	Aldh2	ALDH2	20637.2	21058.9	21502.7	24064	25400.6	22139.4	34867.2	38246.9	39033.3	1.1427	0.1	0.408745	1.81619	0.1	0.178349
P47739	Aldh3a1	AL3A1	698.063	574.676	586.146	433.694	335.979	423.858	185.196	151.141	196.923	0.723127	0.1	0.408745	0.315955	0.1	0.178349
P47740	Aldh3a2	AL3A2	2789.04	3373.59	3934.99	2444.11	3380.34	3657.54	3086.28	2218.9	3511.4	1.002	1	1	0.914836	0.7	0.771399
Q80VQ0	Aldh3b1	AL3B1	218.717	226.596	239.074	193.166	201.497	207.543	210.082	187.097	227.991	0.889235	0.1	0.408745	0.927121	0.4	0.503145
E9Q3E1	Aldh3b2	E9Q3E1	1092.38	985.382	953.885	838.079	1052.4	857.046	995.549	1111.8	1152.95	0.86976	0.4	0.691041	1.12829	0.2	0.301331
Q8CHT0	Aldh4a1	AL4A1	2335.45	2208.43	2162.98	2140.48	1946.33	2016.41	1898.19	1886.13	1925.63	0.913051	0.1	0.408745	0.85952	0.1	0.178349
Q8BWF0	Aldh5a1	SSDH	2009.57	2544.68	2125.59	2332.91	1994.14	2091.29	2037.57	1580.99	2016.05	0.983863	0.7	0.870445	0.948466	0.4	0.503145
Q9EQ20	Aldh6a1	MMSA	6829.11	6739.35	6739.14	6258.07	6012.34	5769.47	6430.62	5876.39	6203.3	0.892125	0.1	0.408745	0.92046	0.1	0.178349
Q9DBF1	Aldh7a1	AL7A1	4793.53	5524.15	4308.91	4181	3920.72	4681.62	3823.86	2823.82	3802.92	0.872217	0.2	0.528743	0.793344	0.1	0.178349
Q9JLJ2	Aldh9a1	AL9A1	4680.99	5394.84	5425.88	5063.67	4969.43	5044.72	5657.06	4970.92	4948.63	0.935101	0.7	0.870445	0.921421	1	1
A6ZI44	Aldoa	A6ZI44	21807.3	19741.7	20559.8	22891.3	20603.4	20904.4	22643.5	21641.2	21796.4	1.01676	0.4	0.691041	1.06015	0.4	0.503145
Q91Y97	Aldob	ALDOB	5399.8	5259.09	6003.78	6898.82	6840.05	6577.07	8170.64	9749.85	8691.16	1.26672	0.1	0.408745	1.60953	0.1	0.178349
P05063	Aldoc	ALDOC	2071.73	1821.75	1782.62	2443.98	2226.2	1905.27	2371.61	2484.94	2259.69	1.22201	0.2	0.528743	1.30183	0.1	0.178349
Q3TZM9	Alg11	ALG11	360.404	525.579	542.208	455.89	457.123	433.322	658.439	553.242	538.277	0.867405	0.7	0.870445	1.05263	0.2	0.301331
Q8VDB2	Alg12	ALG12	162.121	203.906	210.221	138.67	195.02	192.55	247.661	222.291	211.783	0.944308	0.4	0.691041	1.09016	0.1	0.178349
Q9D8C3	Alg13	ALG13	1178.45	1063.14	1042.66	1141.08	1271.53	1025.68	1120.33	1014.63	1029.13	1.07331	1	1	0.96801	0.4	0.503145
Q9D081	Alg14	ALG14	193.177	246.84	238.48	161.597	243.62	241.841	227.349	119.109	207.935	1.01409	1	1	0.871918	0.4	0.503145
Q9DBE8	Alg2	ALG2	714.437	1012.71	939.298	614.339	808.229	826.699	753.705	680.732	860.911	0.860461	0.4	0.691041	0.802413	0.4	0.503145
Q8K2A8	Alg3	ALG3	120.353	187.584	171.903	123.666	108.815	148.857	158.317	55.8554	173.902	0.719394	0.4	0.691041	0.920967	0.7	0.771399
Q9DB25	Alg5	ALG5	1230.64	1509.27	1627.35	1176.04	1263.71	1338.65	1401.51	1091.03	1425.63	0.837299	0.4	0.691041	0.928601	0.4	0.503145
Q8K1E6	Alkbh3	ALKB3	335.038	292.191	263.233	315.15	277.195	279.411	243.291	205.498	244.353	0.956261	1	1	0.832644	0.1	0.178349
Q3TSG4	Alkbh5	ALKB5	242.9	244.226	200.721	239.807	224.58	224.813	208.613	187.807	203.092	0.925537	0.7	0.870445	0.836114	0.4	0.503145
Q8K2U2	Alkbh6	ALKB6	233.048	232.359	201.067	193.975	210.42	242.435	197.164	194.648	172.573	0.905581	1	1	0.837704	0.1	0.178349
Q9D6Z0	Alkbh7	ALKB7	361.391	290.149	280.649	377.048	344.082	305.916	304.316	214.726	321.488	1.18588	0.4	0.691041	1.04883	1	1
Q80Y20	Alkbh8	ALKB8	579.217	603.114	503.186	541.188	607.727	590.413	648.761	619.421	613.292	1.01933	0.7	0.870445	1.06941	0.1	0.178349
P39655	Alox12	LOX12	118.357	131.366	125.74	98.1488	100.796	105.066	83.9144	103.13	107.816	0.801622	0.1	0.408745	0.820185	0.1	0.178349
P39654	Alox15	LOX15	1463.45	1405.49	1378.05	1319.42	1187.9	1577.67	988.65	893.857	985.681	0.938762	0.7	0.870445	0.701308	0.1	0.178349
F8VPQ6	Alpi	F8VPQ6	276.803	238.661	187.805	638.505	617.727	687.56	788.978	758.28	737.345	2.67536	0.1	0.408745	3.17723	0.1	0.178349
Q9CXB8	Alpk1	ALPK1	57.2197	54.657	39.3167	58.5559	51.9613	67.3857	35.067	56.6635	39.0476	1.07133	0.4	0.691041	0.714412	0.4	0.503145
P09242	Alpl	PPBT	1545.72	1050.11	841.707	1013.69	928.902	824.143	717.171	623.256	790.814	0.884576	0.4	0.691041	0.682948	0.1	0.178349
O08583	Alyref	THOC4	1285.16	942.558	884.935	1435.15	1652.04	1323.76	1595.1	2083.72	1719.78	1.52261	0.1	0.408745	1.82459	0.1	0.178349
G3X9I4	Alyref2	G3X9I4	1917.35	1645.65	1833.13	2143.87	2533.2	2152.67	2002.49	2042.86	2104.49	1.17431	0.1	0.408745	1.11441	0.1	0.178349
O09174	Amacr	AMACR	2122.53	2331.78	2106.69	1943.03	1778.24	1863.96	2017.83	2136.34	2157.3	0.878178	0.1	0.408745	1.00651	1	1
Q07456	Ambp	AMBP	240.139	188.257	161.929	164.442	155.229	141.377	124.432	74.4482	67.7679	0.824559	0.2	0.528743	0.39546	0.1	0.178349
A2AH22	Ambra1	AMRA1	382.525	411.761	370.381	461.019	400.803	475.697	449.574	409.446	436.938	1.2052	0.2	0.528743	1.14225	0.2	0.301331
Q8JZV7	Amdhd2	NAGA	3839.3	2831.34	2931.57	3160.49	3270.38	3324.77	2638.33	3297.99	2910.49	1.11557	0.7	0.870445	0.992809	0.7	0.771399
Q9R049-2	Amfr	AMFR	477.594	427.863	416.168	603.135	455.769	374.363	601.778	664.907	546.962	1.06522	1	1	1.40647	0.1	0.178349
Q9JHT5	Ammecr1	AMMR1	60.2108	79.3804	70.9521	73.7507	92.0596	65.5529	68.0942	58.783	68.7161	1.03944	0.7	0.870445	0.959721	0.4	0.503145
Q8JZZ6	Ammecr1l	AMERL	29.5529	26.2219	30.3093	41.1508	32.0238	31.7132	44.6984	61.6565	39.0579	1.08361	0.1	0.408745	1.51249	0.1	0.178349
B8JKU8	Amn1	B8JKU8	47.3347	48.0462	55.3755	45.3266	61.3892	42.9832	84.4617	58.3058	80.9194	0.943396	0.7	0.870445	1.6842	0.1	0.178349
Q8VHG2	Amot	AMOT	99.891	115.113	87.2898	130.279	118.57	103.661	82.0066	84.6315	102.452	1.18699	0.2	0.528743	0.847238	0.4	0.503145
Q9D4H4	Amotl1	AMOL1	164.866	151.529	150.664	184.131	149.564	144.155	140.782	135.234	144.52	0.987032	0.7	0.870445	0.929076	0.1	0.178349
Q8K371	Amotl2	AMOL2	114.056	127.832	114.397	147.251	133.334	118.151	177.011	157.213	112.456	1.16554	0.2	0.528743	1.37428	0.7	0.771399
Q9DBT5	Ampd2	AMPD2	993.607	1055.35	986.922	1110.2	993.793	981.23	1023.05	913.039	915.45	1.00019	1	1	0.92134	0.4	0.503145
O08739	Ampd3	AMPD3	2395.46	2862.8	3083.74	2763.79	2995.79	2938.22	3828.47	3342.56	3744.94	1.02635	1	1	1.30814	0.1	0.178349
Q7TQF7	Amph	AMPH	1425.48	1193.3	1066.94	1011.39	908.056	1189.7	705.218	756.776	842.739	0.847557	0.2	0.528743	0.634188	0.1	0.178349
Q8CFA2	Amt	GCST	1579.7	1818.76	1369.38	2139.04	2484.62	2516.64	1863.01	1526.89	1951.34	1.57284	0.1	0.408745	1.17934	0.4	0.503145
P00688	Amy2	AMYP	9055.14	3545.1	888.595	2314.9	1389.29	783.944	2932.61	11498.1	10531	0.39189	0.4	0.691041	2.97058	0.4	0.503145
Q400C8	Amz2	AMZ2	49.6238	56.3329	53.1723	59.9628	68.1313	63.086	63.5925	39.573	62.5168	1.18644	0.1	0.408745	1.17574	0.7	0.771399
P53995	Anapc1	APC1	2414.3	2697.64	2679.51	2580.43	2428.01	2879.84	3007.89	2615.69	2901.17	0.963023	1	1	1.08272	0.4	0.503145
Q8K2H6	Anapc10	APC10	107.191	120.721	114.328	113.511	136.21	111.246	136.07	121.252	140.721	0.992854	1	1	1.19017	0.1	0.178349
Q9CPX9	Anapc11	APC11	45.552	42.9326	33.7819	64.9723	41.9448	47.8552	44.965	95.0311	42.5469	1.11466	0.4	0.691041	1.04734	0.7	0.771399
Q9CPV2	Anapc16	APC16	56.4947	62.157	57.6373	67.8587	69.4975	56.2221	44.7484	44.2421	50.4491	1.17734	0.7	0.870445	0.776379	0.1	0.178349
Q91W96	Anapc4	APC4	670.411	674.274	663.993	643.159	694.235	726.527	733.436	653.606	668.837	1.03554	0.7	0.870445	0.997652	1	1
Q8BTZ4	Anapc5	APC5	544.107	679.386	676.1	624.006	741.315	707.115	891.391	906.832	820.051	1.04587	0.4	0.691041	1.31843	0.1	0.178349
Q9WVM3	Anapc7	APC7	595.765	790.51	734.053	725.878	684.659	760.586	981.206	842.43	774.512	0.988863	1	1	1.14764	0.2	0.301331
P21570	Ang	ANGI	67.2219	56.6508	54.2971	52.1969	63.9431	49.9218	54.5188	37.525	38.5937	0.92138	0.4	0.691041	0.681256	0.2	0.301331
Q3TMQ6	Ang4	ANG4	1338.54	688.209	1080.8	769.54	328.575	190.816	299.617	334.315	472.341	0.304011	0.2	0.528743	0.309322	0.1	0.178349
Q8VCU0	Angel1	ANGE1	44.1095	44.8425	38.3686	47.9382	52.651	54.4103	40.376	36.3336	41.4221	1.19364	0.1	0.408745	0.915358	0.4	0.503145
Q8K1C0	Angel2	ANGE2	379.429	358.688	316.526	381.13	340.002	324.601	346.966	335.74	313.922	0.947905	1	1	0.936022	0.4	0.503145
Q9R045	Angptl2	ANGL2	631.636	667.195	544.984	469.953	447.961	402.522	462.732	457.312	528.886	0.709208	0.1	0.408745	0.732593	0.1	0.178349
Q02357	Ank1	ANK1	1332.13	1226.52	1210.32	1045.4	1119.94	1141.07	1049.49	1222.11	1144.64	0.913104	0.1	0.408745	0.933242	0.2	0.301331
Q8C8R3-2	Ank2	ANK2	9147.78	7566.32	7020.53	6869.52	6278.93	6555.23	4809.4	4829.25	5074.75	0.86637	0.1	0.408745	0.638256	0.1	0.178349
Q8C8R3-4	Ank2	ANK2	266.15	233.651	290.326	222.634	249.594	246.458	161.22	126.722	158.614	0.926012	0.4	0.691041	0.595957	0.1	0.178349
G5E8K5-2	Ank3	ANK3	9532.39	9058.2	8919.11	8199.72	8137.98	8559.39	7266.02	6749.45	7068.88	0.905226	0.1	0.408745	0.780385	0.1	0.178349
G5E8K5	Ank3	ANK3	59.7581	51.8107	48.2585	62.6237	63.5802	64.8667	48.0268	33.0413	49.3205	1.22716	0.1	0.408745	0.926967	0.2	0.301331
Q810B6	Ankfy1	ANFY1	5987.49	7184.35	7002.96	6222.78	6278.52	6896.18	7980.87	6630.35	6686.82	0.896552	0.7	0.870445	0.954856	1	1
E9PUR0	Ankhd1	E9PUR0	4555.62	4184.03	3892.47	5064.31	4576.27	4394.9	4000.85	3537.36	3878.13	1.09375	0.2	0.528743	0.926889	0.2	0.301331
F6RUI8	Ankhd1	F6RUI8	361.498	291.908	282.314	423.408	361.901	373.192	193.687	150.38	213.871	1.27846	0.1	0.408745	0.663521	0.1	0.178349
Q6ZPS6	Ankib1	AKIB1	846.154	958.699	806.348	896.406	1152.77	1000.56	865.884	619.181	923.287	1.18248	0.2	0.528743	1.02332	1	1
Q6P1H6	Ankle2	ANKL2	1987.58	1878.78	1894.72	2108.73	1819.54	1739.71	1554.58	1413.09	1458.5	0.960321	0.7	0.870445	0.769771	0.1	0.178349
Q3TPE9	Ankmy2	ANKY2	1937.34	2208.89	2372.37	1854.43	2228.04	2476.53	1874.57	1711.3	1925.63	1.00867	1	1	0.848648	0.1	0.178349
E9Q4F7	Ankrd11	E9Q4F7	665.956	713.619	641.993	726.388	769.754	744.078	742.77	624.349	684.991	1.11731	0.1	0.408745	1.02858	1	1
Q80UP5	Ankrd13a	AN13A	2495.64	2577.27	2216.08	2669.73	2067.24	2466.8	2379.22	2104.04	2187.43	0.988444	1	1	0.876501	0.2	0.301331
Q99NH0	Ankrd17	ANR17	3197.58	3077.91	2900.48	3352.37	3471.34	3430.75	2558.96	2424.17	2513.37	1.11464	0.1	0.408745	0.816583	0.1	0.178349
Q9D3J5	Ankrd22	ANR22	61.9351	68.6248	71.7026	67.8178	80.2027	75.4778	108.671	119.828	114.051	1.09986	0.4	0.691041	1.66195	0.1	0.178349
Q3UMR0	Ankrd27	ANR27	196.656	228.37	193.545	203.432	227.19	220.981	269.407	281.704	234.581	1.12369	0.7	0.870445	1.36994	0.1	0.178349
Q505D1	Ankrd28	ANR28	1734.22	1800.67	1700	2053.01	1817.13	2039.58	2238.51	2119.07	1872.36	1.17608	0.1	0.408745	1.22192	0.1	0.178349
Q5SUE8	Ankrd40	ANR40	1063.78	853.218	837.348	981.546	1011.21	891.07	732.42	555.219	757.19	1.1504	0.7	0.870445	0.858421	0.1	0.178349
B2RXR6	Ankrd44	ANR44	2843.57	2582.27	2451.76	2669.92	2132.61	2405.21	2083.84	1894.58	1932.19	0.931432	0.4	0.691041	0.748253	0.1	0.178349
Q8BTZ5	Ankrd46	ANR46	63.98	54.3449	59.0509	48.8712	65.8151	66.7437	50.5732	41.089	46.1705	1.11455	0.7	0.870445	0.781876	0.1	0.178349
Q8VE42	Ankrd49	ANR49	591.294	518.928	462.301	524.878	537.33	475.05	455.672	450.709	449.636	1.01147	1	1	0.868539	0.1	0.178349
F7BE84	Ankrd50	F7BE84	524.439	497.972	462.051	651.913	619.389	598.787	509.988	430.949	480.406	1.24382	0.1	0.408745	0.964725	0.7	0.771399
Q8BTI7	Ankrd52	ANR52	587.372	632.658	558.287	699.925	588.759	677.741	609.539	630.59	618.088	1.15385	0.2	0.528743	1.05229	0.7	0.771399
Q91WK7	Ankrd54	ANR54	138.942	160.715	159.493	171.406	161.386	162.102	115.87	49.5989	79.6302	1.01636	0.1	0.408745	0.499271	0.1	0.178349
P59672	Anks1a	ANS1A	2060.42	1801.58	1730.39	2286.06	1998.98	1937.77	1694.91	1603.93	1719.41	1.10957	0.4	0.691041	0.940791	0.1	0.178349
Q9CZK6	Anks3	ANKS3	50.1683	42.3149	38.3985	45.282	39.8401	39.7151	40.5676	35.1033	40.4999	0.941515	1	1	0.957107	0.4	0.503145
Q8K3X6	Anks4b	ANS4B	1328.96	1211.38	1181.43	1479.55	1542.25	1614.02	1420.41	1671.03	1584.55	1.27313	0.1	0.408745	1.30805	0.1	0.178349
Q80UU1	Ankzf1	ANKZ1	1172.3	1130.07	1049.43	1273.54	1373.6	1278.15	1423.12	1661.25	1388.99	1.13104	0.1	0.408745	1.25932	0.1	0.178349
Q8K298	Anln	ANLN	157.138	163.091	140.746	223.463	179.815	216.383	92.1461	75.4441	103.366	1.37702	0.1	0.408745	0.586402	0.1	0.178349
Q8BHY3	Ano1	ANO1	1759.04	2064.88	2090.58	1689.47	1913.91	1969.08	2076.96	3194.51	2258.24	0.926887	0.4	0.691041	1.09364	0.2	0.301331
D3Z035	Ano1	D3Z035	30.0323	21.9765	25.1834	30.2094	27.7628	33.0943	18.3674	32.9698	32.9461	1.19958	0.2	0.528743	1.30825	0.7	0.771399
Q8BH79	Ano10	ANO10	1327.14	1546.99	1542.77	1198.55	1450.94	1404.62	1674.78	1670.44	1789.48	0.910453	0.4	0.691041	1.08557	0.1	0.178349
Q6P9J9	Ano6	ANO6	1226.91	1404.78	1306.19	1126.71	1196.99	1318.07	1198.08	1061.05	1241.47	0.916398	0.4	0.691041	0.917233	0.2	0.301331
Q14AT5	Ano7	ANO7	263.809	316.789	339.528	247.582	309.924	295.356	373.727	250.16	347.71	0.932343	0.4	0.691041	1.09761	0.7	0.771399
P86044	Ano9	ANO9	15.8691	23.0006	24.1106	17.7333	26.7058	34.3202	23.1515	17.2113	28.6225	1.16109	0.4	0.691041	1.00656	0.7	0.771399
O35381	Anp32a	AN32A	3887.37	3857.77	3897.35	4162.85	3875.86	3471.9	4269.66	3468.78	3778.09	0.997039	1	1	0.971888	0.7	0.771399
Q9EST5	Anp32b	AN32B	1024.79	1227.62	1227.12	1127.5	1590.96	1569.31	1670.58	1126.7	1423.08	1.27886	0.4	0.691041	1.15969	0.4	0.503145
P97822	Anp32e	AN32E	1309.33	1064.23	1183.09	1132.96	1214.81	1212.4	951.69	952.041	905.287	1.02477	1	1	0.80441	0.1	0.178349
P97449	Anpep	AMPN	4267.85	4075.83	3919.92	3889.43	3886.68	3991.7	4502.65	4478.13	4863.14	0.954267	0.2	0.528743	1.10472	0.1	0.178349
Q9CZ52	Antxr1	ANTR1	154.182	148.662	129.213	124.909	112.093	136.791	134.991	105.605	119.149	0.840221	0.2	0.528743	0.801476	0.2	0.301331
Q6DFX2	Antxr2	ANTR2	140.495	156.791	130.713	134.419	142.898	123.802	180.583	141.028	176.904	0.956753	0.7	0.870445	1.25915	0.2	0.301331
P10107	Anxa1	ANXA1	4525.61	5398.98	5628.39	5783.62	5646.56	5550.15	7763.62	8568.73	7638.16	1.04586	0.2	0.528743	1.43798	0.1	0.178349
P97384	Anxa11	ANX11	4267.49	5661.3	5324.12	6101.43	6595.12	5819.9	9248.5	7957.58	8816.92	1.146	0.1	0.408745	1.65603	0.1	0.178349
Q99JG3	Anxa13	ANX13	747.5	1162.05	1150.97	878.448	812.801	821.567	906.381	681.364	760.444	0.713804	0.7	0.870445	0.660698	0.4	0.503145
P07356	Anxa2	ANXA2	9139.57	11203.6	11691.2	12767.1	15939	12549.4	21261.9	29341.2	21741.6	1.13955	0.1	0.408745	1.94059	0.1	0.178349
A6NMY6	ANXA2P2	AXA2L	485.264	515.593	671.079	526.317	871.235	1064.98	868.568	770.112	1088.73	1.68977	0.2	0.528743	1.6846	0.1	0.178349
O35639	Anxa3	ANXA3	5098.68	4984.88	5470.93	7036.87	7107.45	6269.24	9012.72	10728	9766.01	1.38014	0.1	0.408745	1.9154	0.1	0.178349
P97429	Anxa4	ANXA4	8624.14	11689.7	11149.1	9987.04	12530.4	13151.4	14114.3	12015.5	12729.9	1.12389	0.4	0.691041	1.14179	0.1	0.178349
P48036	Anxa5	ANXA5	9990.16	10593.5	9806.92	9380.39	8938.87	10276.1	8331.95	7887.17	8601.64	0.938963	0.4	0.691041	0.834016	0.1	0.178349
P14824	Anxa6	ANXA6	22095.2	28520.9	28590.6	17940.3	20201.3	25575.5	20191.9	16489.2	19385.7	0.708298	0.2	0.528743	0.679702	0.1	0.178349
F8WIT2	Anxa6	F8WIT2	96.6589	115.051	82.1644	69.3024	61.5464	90.4915	69.3391	58.4022	78.5946	0.716979	0.2	0.528743	0.717359	0.1	0.178349
Q07076	Anxa7	ANXA7	1981.55	2186.61	2128.9	2603.29	2564.48	2405.9	3396.13	2740.35	2803.72	1.2046	0.1	0.408745	1.31698	0.1	0.178349
O35640	Anxa8	ANXA8	538.248	636.754	716.209	959.541	1779.11	1300.15	3121.41	3941.04	3078.54	2.04184	0.1	0.408745	4.90207	0.1	0.178349
Q8JZQ5	Aoc1	AOC1	1798.86	1860.52	1764.03	1696.84	2623.14	2511.88	3407.11	2717.44	3377.85	1.39637	0.7	0.870445	1.87777	0.1	0.178349
O70423	Aoc3	AOC3	3020.82	3419.03	3357.17	1991.04	2122.49	2319.01	2059.67	1487.23	2134.45	0.632226	0.1	0.408745	0.613514	0.1	0.178349
O54754	Aox1	AOXA	130.166	153.564	154.808	108.838	102.48	104.944	101.658	62.6343	98.5958	0.683389	0.1	0.408745	0.64205	0.1	0.178349
E9PYF7	Ap1ar	E9PYF7	318.519	335.61	318.911	400.841	359.744	344.773	390.877	318.504	350.116	1.12804	0.1	0.408745	1.09785	0.7	0.771399
O35643	Ap1b1	AP1B1	13210.4	13555.7	14939.1	12857.7	12459.4	14108.5	15032.4	12200.3	14058.7	0.948509	0.4	0.691041	1.03711	1	1
P22892	Ap1g1	AP1G1	1940.42	2388.73	2457.98	1715.22	2340.21	2758.51	2708.84	1904.03	2441.09	0.979688	1	1	1.02192	1	1
O88512	Ap1g2	AP1G2	1382.2	1643.92	1765.18	1678.56	1662.85	1969.81	2239.67	1783.61	1888.45	1.02107	0.4	0.691041	1.14875	0.1	0.178349
P35585	Ap1m1	AP1M1	2122.66	2728.93	2677.11	2200.65	2722.78	2762.11	3382.05	2471.49	3117.45	1.01706	0.7	0.870445	1.16448	0.4	0.503145
Q9WVP1-2	Ap1m2	AP1M2	1542.09	1872.9	1906.56	1636.88	2210.82	2105.51	2528.58	1894.98	2252.1	1.1242	0.4	0.691041	1.20247	0.2	0.301331
P61967	Ap1s1	AP1S1	538.629	766.344	637.852	578.427	650.188	678.33	681.448	317.925	677.955	1.01934	1	1	1.06287	1	1
Q3TIV9	Ap1s2	Q3TIV9	138.926	178.426	151.622	118.782	133.249	159.459	93.001	58.2989	90.8295	0.878824	0.4	0.691041	0.599052	0.1	0.178349
P17426	Ap2a1	AP2A1	5250.45	5584.32	5669.3	5298.81	4929.12	5255.2	5594.04	4417.97	5041	0.941064	0.4	0.691041	0.902706	0.4	0.503145
P17427	Ap2a2	AP2A2	6820.39	7218.55	7042.32	7412.81	6665.6	6863.83	7816.5	5724.92	7520.13	0.974655	1	1	1.06785	0.7	0.771399
Q9DBG3	Ap2b1	AP2B1	6858.47	7215.52	7027.48	6774.01	6818.19	7571.23	7503.33	6292.08	7504.71	0.970218	0.7	0.870445	1.06771	0.7	0.771399
P84091	Ap2m1	AP2M1	2001.53	2419.35	2675.87	2089.65	2160.48	2327.09	2295.36	2249.05	2392.52	0.893	0.7	0.870445	0.948751	0.7	0.771399
P62743	Ap2s1	AP2S1	794.59	1043.59	1157.4	795.899	1082.49	1126.75	1191.1	629.472	1033.54	1.03727	1	1	0.99037	1	1
Q9Z1T1	Ap3b1	AP3B1	7391.81	8359.56	8796.4	6867.67	8449.42	8780.98	8570.52	8200.2	8493.68	1.01075	1	1	1.01604	1	1
O54774	Ap3d1	AP3D1	2958.28	3645.96	3848.68	3115.06	3689.2	3535.4	4174.29	3378	3777.17	0.969676	1	1	1.03599	0.7	0.771399
Q9JKC8	Ap3m1	AP3M1	3321.54	4281.22	4255.4	3203.3	4141.46	4056.3	3794.37	3164.47	4070.08	0.953212	0.4	0.691041	0.89166	0.4	0.503145
Q9DCR2	Ap3s1	AP3S1	1982.29	2091.96	2468.51	1976.13	2413.95	2491.09	2279.09	1660.62	1976.85	1.15392	1	1	0.944975	0.4	0.503145
Q8BSZ2	Ap3s2	AP3S2	377.571	452.578	378.398	355.091	412.91	443.706	407.966	287.617	370.93	1.09121	1	1	0.980264	0.4	0.503145
Q9WV76	Ap4b1	AP4B1	243.095	265.534	291.206	244.285	252.205	284.291	297.559	263.167	290.502	0.949803	1	1	1.09403	0.7	0.771399
Q80V94	Ap4e1	AP4E1	124.76	129.498	125.156	135.735	142.701	131.888	182.494	152.401	170.62	1.08453	0.1	0.408745	1.36326	0.1	0.178349
Q9JKC7	Ap4m1	AP4M1	501.949	573.109	526.446	540.2	590.746	610.955	568.975	572.657	543.287	1.12214	0.2	0.528743	1.08079	0.7	0.771399
Q9WVL1	Ap4s1	AP4S1	252.282	332.459	320.912	295.122	404.619	380.058	558.437	545.734	468.932	1.18431	0.4	0.691041	1.70057	0.1	0.178349
Q3U829	Ap5z1	AP5Z1	199.898	205.544	177.555	179.737	195.213	222.961	218.304	256.35	221.149	0.976563	1	1	1.10631	0.1	0.178349
O88879	Apaf1	APAF	1813.07	2161.8	1961.75	2190.11	1854.25	2521.58	2525.28	2383.15	1915.52	1.11641	0.4	0.691041	1.21481	0.4	0.503145
O88888	Apba3	APBA3	57.8093	52.3	55.0173	34.9117	42.0358	36.4792	38.5653	37.0219	37.1325	0.66305	0.1	0.408745	0.674924	0.1	0.178349
Q9QXJ1	Apbb1	APBB1	193.705	168.528	164.469	159.46	158.088	167.515	87.9977	76.2081	106.441	0.946193	0.2	0.528743	0.522155	0.1	0.178349
Q8R5A3	Apbb1ip	AB1IP	1600.91	1491.77	1412.7	1396.42	1394.5	1357.5	980.732	877.645	997.743	0.934796	0.1	0.408745	0.657428	0.1	0.178349
Q9DBR4	Apbb2	APBB2	70.1226	91.4575	70.3032	80.7602	95.3323	95.0911	79.2624	61.6762	83.3057	1.35259	0.2	0.528743	1.12744	1	1
Q61315	Apc	APC	743.725	758.871	661.889	895.744	729.891	670.548	777.984	580.442	614.001	0.981399	1	1	0.825575	0.7	0.771399
Q8R146	Apeh	APEH	6091.22	6466.73	6098.22	6637.54	5395.45	6232.86	6782.66	5619.76	6919.31	1.02208	1	1	1.11224	0.7	0.771399
P28352	Apex1	APEX1	1057.2	1238.86	1208.5	1382.25	1275.33	1198.47	1385.24	1726.05	1392.95	1.0553	0.4	0.691041	1.15263	0.1	0.178349
Q8BVF7	Aph1a	APH1A	32.1196	33.1882	28.7267	33.5333	26.482	33.8663	42.3015	18.9439	32.8871	1.04401	0.7	0.870445	1.02389	1	1
O35841	Api5	API5	3472.33	3920.52	4461.71	3782	4104.09	3854.4	4900.48	4343.96	4581.62	0.983135	1	1	1.16863	0.2	0.301331
Q9WVQ5	Apip	MTNB	2495.66	2590.1	2501.58	2378.91	2402.8	2200.04	2526.44	2055.33	2430.78	0.950963	0.1	0.408745	0.971698	0.4	0.503145
Q9D842	Aplf	APLF	947.865	802.419	698.633	939.728	901.362	857.584	514.159	336.168	507.186	1.12331	0.7	0.870445	0.632071	0.1	0.178349
Q03157	Aplp1	APLP1	69.0137	48.5842	45.2296	75.4578	76.954	54.8547	82.0472	73.8067	81.6669	1.55313	0.2	0.528743	1.68094	0.1	0.178349
Q60709	Aplp2	Q60709	1330.04	1197.41	1155.59	1179.26	1163.36	1136.87	1123.44	1277.93	1113.07	0.971564	0.4	0.691041	0.938225	0.4	0.503145
Q9D7N9	Apmap	APMAP	1206.96	1350.68	1509.61	1252.24	1448.96	1412.86	1530.43	1028.3	1460.75	1.04604	1	1	1.08149	1	1
Q00623	Apoa1	APOA1	7878.3	6011.87	5947.78	4531.01	5218.32	5383.85	3595.03	5797.35	4950.73	0.868003	0.1	0.408745	0.823493	0.1	0.178349
Q8K4Z3	Apoa1bp	NNRE	4833.59	4204.22	3732.08	4382.87	4122.41	4115.23	3217	3408.52	3431.09	0.980541	1	1	0.810738	0.1	0.178349
P09813	Apoa2	APOA2	133.493	101.586	89.8011	70.245	118.851	65.935	51.618	76.7904	65.6531	0.691483	0.4	0.691041	0.646281	0.1	0.178349
P06728	Apoa4	APOA4	7366.92	5064.61	4763.28	4632.16	5686.2	5528.32	3982.58	4993.94	4681.15	1.09156	1	1	0.924286	0.2	0.301331
E9Q414	Apob	APOB	307.519	357.906	293.46	336.621	377.665	379.892	493.794	503.579	472.598	1.2281	0.2	0.528743	1.60573	0.1	0.178349
Q9WV35	Apobec2	ABEC2	50.3768	76.1474	65.6594	71.058	65.3042	61.1213	85.4997	79.9017	72.8535	0.99459	1	1	1.21691	0.2	0.301331
Q99J72	Apobec3	ABEC3	320.59	484.056	542.335	220.858	402.905	643.554	321.991	701.465	470.644	0.832352	1	1	0.972292	1	1
Q8VBT6	Apobr	APOBR	687.604	547.702	507.004	551.627	505.296	511.032	337.467	222.309	308.024	0.933048	0.7	0.870445	0.562393	0.1	0.178349
P34928	Apoc1	APOC1	957.707	853.617	832.237	582.83	813.748	582.369	515.104	631.668	591.355	0.682777	0.1	0.408745	0.692764	0.1	0.178349
P33622	Apoc3	APOC3	154.428	131.972	121.163	83.7698	127.128	116.787	60.746	30.4961	66.6539	0.884938	0.2	0.528743	0.460295	0.1	0.178349
Q61268	Apoc4	APOC4	115.638	100.355	81.8484	67.4119	73.0917	70.914	52.8626	66.3467	62.3255	0.706631	0.1	0.408745	0.62105	0.1	0.178349
P08226	Apoe	APOE	1281.67	1179.54	1134.01	1130.78	1277.52	982.08	868.249	739.518	844.886	0.958662	0.4	0.691041	0.716284	0.1	0.178349
Q01339	Apoh	APOH	10513.2	6339.25	6786.96	4557.46	5030.7	5803.91	3850.17	2418.57	2923.28	0.74123	0.1	0.408745	0.43072	0.1	0.178349
Q8CCA5	Apol10a	Q8CCA5	499.248	777.127	622.895	823.718	769.533	1167.46	869.498	798.601	1162.37	1.3224	0.2	0.528743	1.3959	0.1	0.178349
Q9DCZ4	Apoo	APOO	1000.37	904.371	906.866	988.099	929.124	773.322	905.785	970.886	936.557	1.02454	1	1	1.03274	1	1
Q78IK4	Apool	APOOL	2728.86	3343.78	3721.27	2778.92	3873.1	3853.87	4040.08	4054.66	4476.63	1.15255	0.4	0.691041	1.2126	0.1	0.178349
Q9CQW7	Apopt1	APOP1	58.9889	75.2138	89.0409	90.296	96.5434	92.5787	117.032	136.488	108.618	1.23087	0.1	0.408745	1.55599	0.1	0.178349
P12023	App	A4	4799.18	4510.92	4575.85	4429.64	4454.41	4469.99	4497.99	3356.98	4067.41	0.973461	0.1	0.408745	0.888886	0.1	0.178349
Q8K3H0	Appl1	DP13A	3605.89	3701.73	3637.11	3815.63	3770.72	4471.24	4443.36	3411.95	3777.05	1.04908	0.1	0.408745	1.03848	0.7	0.771399
Q8K3G9	Appl2	DP13B	4266.46	5298.05	5367.73	4910.6	5593.28	5264.28	7634.36	7628.64	6296.83	0.993626	1	1	1.4399	0.1	0.178349
P08030	Aprt	APT	1623.05	1396.99	1287.43	1422.9	1465.32	1475.56	1546.12	1444.92	1711.84	1.04891	0.7	0.870445	1.10675	0.4	0.503145
Q7TQC5	Aptx	APTX	94.4779	100.916	84.0892	117.773	91.0709	103.514	111.974	131.883	128.694	1.09564	0.4	0.691041	1.36216	0.1	0.178349
P55088	Aqp4	AQP4	690.641	794.431	957.665	873.286	928.847	1012.05	694.597	568.899	789.324	1.1692	0.4	0.691041	0.874333	0.4	0.503145
Q8CFQ3	Aqr	AQR	518.612	701.34	616.829	566.793	707.227	624.683	791.81	818.617	757.506	1.01273	0.7	0.870445	1.28368	0.1	0.178349
P04627	Araf	ARAF	705.214	866.532	783.384	891.293	873.829	805.835	992.923	909.805	991.817	1.11545	0.2	0.528743	1.26607	0.1	0.178349
Q4LDD4	Arap1	ARAP1	2258.18	2611.5	2412.93	2819.51	2859.33	2597.36	3996.25	4124.49	3565.46	1.1685	0.2	0.528743	1.65618	0.1	0.178349
Q8BZ05	Arap2	ARAP2	942.368	893.072	928.1	1081.15	1220.81	1075.28	1156.51	1250.08	1189.86	1.16491	0.1	0.408745	1.28204	0.1	0.178349
Q5XJY5	Arcn1	COPD	10971.6	12880.8	13516.8	11942.9	11938.2	12393	14446.6	15813.3	14416.8	0.927186	0.7	0.870445	1.12156	0.1	0.178349
A2A6T9	Arf2	A2A6T9	290.754	349.646	356.808	303.135	340.608	326.043	303.28	231.518	310.905	0.932495	0.7	0.870445	0.867392	0.4	0.503145
P61205	Arf3	ARF3	11656	12212.3	13590.9	12599.8	13734.3	11494.9	14194.2	10052.2	12399.7	1.03173	1	1	1.01534	1	1
P61750	Arf4	ARF4	4724.99	4845.32	5544.09	4519.12	4632.92	4678.53	4150.06	3168.78	4209.05	0.956164	0.1	0.408745	0.856509	0.1	0.178349
P84084	Arf5	ARF5	2301.51	2337.97	2595.05	2467.87	2494.75	2109.5	2657.12	1801.59	2008.97	1.05556	1	1	0.85928	0.7	0.771399
P62331	Arf6	ARF6	4158.6	4450.51	4430.92	4366.25	4137.84	3682.1	5372.89	4273.31	5352.72	0.933856	0.2	0.528743	1.20804	0.4	0.503145
Q9EPJ9	Arfgap1	ARFG1	2537.28	2246.57	2083.75	2421.23	2743.82	2398.34	1961.32	2250.47	2004.86	1.07774	0.4	0.691041	0.892409	0.4	0.503145
Q99K28	Arfgap2	ARFG2	2299.35	2234.29	2282.37	2539.11	2582.67	2376.48	2061.77	2135.57	2214.49	1.11249	0.1	0.408745	0.935681	0.1	0.178349
Q9D8S3	Arfgap3	ARFG3	3879.59	3913.81	3810.33	4602.44	4283.25	4008.2	3315.41	2796.31	3312.08	1.10405	0.1	0.408745	0.853719	0.1	0.178349
G3X9K3	Arfgef1	BIG1	2267.62	2799.66	2796.32	2693.11	2925.17	3146.76	3691.28	2891.43	3624.72	1.04608	0.4	0.691041	1.29625	0.1	0.178349
A2A5R2	Arfgef2	BIG2	982.201	1340.64	1319.78	1122.6	1169.16	1387.44	1917.47	1392.06	1513.31	0.885875	1	1	1.14664	0.1	0.178349
Q3UGY8	Arfgef3	BIG3	2208.31	2568.93	2640.52	2439.58	2441.19	2594.63	2596.44	2864.75	2579.81	0.950275	1	1	1.01071	0.4	0.503145
G5E8V9	Arfip1	G5E8V9	3303.1	3989.74	4193.63	4233.08	4162.8	3579.54	4873.56	5081.45	4882.53	1.04338	0.7	0.870445	1.22377	0.1	0.178349
Q8K221	Arfip2	ARFP2	2283.98	2952.27	2823.71	2666	2521.08	2459.88	3330.3	2802.19	2974.92	0.892825	0.7	0.870445	1.05355	0.4	0.503145
Q8BXL7	Arfrp1	ARFRP	155.114	184.273	203.259	185.428	222.463	166.813	266.487	290.05	230.552	1.00627	0.7	0.870445	1.44615	0.1	0.178349
Q61176	Arg1	ARGI1	1053.61	980.723	1537.17	1135.51	1017.81	1190.19	1093.2	1116.02	1037.29	1.07773	1	1	1.03758	1	1
O08691	Arg2	ARGI2	1213.44	1355.03	901.578	875.753	961.75	986.01	838.234	463.967	661.509	0.792581	0.4	0.691041	0.545152	0.1	0.178349
Q5FWK3	Arhgap1	RHG01	3507.31	3834.46	4031.86	3638.53	3757.68	4036.33	4093.45	4097.03	4257.45	0.979976	1	1	1.06848	0.1	0.178349
Q6Y5D8	Arhgap10	RHG10	1105.48	1120.07	972.976	921.955	887.99	856.089	678.324	647.351	766.315	0.803262	0.1	0.408745	0.613601	0.1	0.178349
Q80Y19	Arhgap11a	RHGBA	249.036	263.111	242.791	349.405	314.45	339.588	212.483	207.873	263.773	1.36361	0.1	0.408745	0.853222	0.7	0.771399
S4R203	Arhgap12	S4R203	2989.36	2936.96	2737.73	3109.39	3687.33	3440.05	3472.37	3439.71	3478.53	1.1713	0.1	0.408745	1.1823	0.1	0.178349
Q811M1	Arhgap15	RHG15	59.1551	65.5879	65.944	44.0354	58.1374	70.9425	43.8901	43.2215	57.4689	0.886404	0.7	0.870445	0.66918	0.1	0.178349
Q3UIA2	Arhgap17	RHG17	2588.87	2587.75	2582.17	2864.9	3179.75	3029.61	2602.89	2605.17	2674.74	1.17075	0.1	0.408745	1.00673	0.1	0.178349
Q8K0Q5	Arhgap18	RHG18	1631.96	1992.79	1990.68	1911.33	2084.94	1862.18	2372.2	2197.46	2343.04	0.960139	1	1	1.17701	0.1	0.178349
Q6DFV3	Arhgap21	RHG21	2777.77	2953.16	2526.08	3414.66	3566.66	3207.51	3264.17	3033.54	3390.64	1.22928	0.1	0.408745	1.1751	0.1	0.178349
Q8BL80	Arhgap22	RHG22	74.5282	70.743	65.4408	60.0747	59.5565	50.3635	64.4183	54.6254	64.8266	0.841871	0.1	0.408745	0.910596	0.1	0.178349
Q8C4V1	Arhgap24	RHG24	1688.07	1469.7	1577.46	1311.53	1386.47	1392.33	1180.2	1136.91	1140.27	0.878926	0.1	0.408745	0.722852	0.1	0.178349
Q8BYW1	Arhgap25	RHG25	3320.87	3342.53	2963.98	2819.95	2402.71	2139.99	1667.91	1409.88	1728.69	0.723518	0.1	0.408745	0.502251	0.1	0.178349
Q6ZQ82	Arhgap26	RHG26	568.7	686.432	721.517	643.889	822.336	834.655	985.44	878.006	885.361	1.19799	0.4	0.691041	1.2898	0.1	0.178349
A2AB59	Arhgap27	RHG27	730.994	712.472	654.187	739.516	859.751	807.269	723.439	605	722.47	1.13305	0.1	0.408745	1.01403	1	1
Q8BN58	Arhgap28	RHG28	27.747	39.3566	36.9173	32.3627	38.9579	32.0846	52.7551	61.8572	46.7897	0.876627	1	1	1.42901	0.1	0.178349
Q8CGF1	Arhgap29	RHG29	61.2431	55.7087	60.0563	66.0313	63.6674	70.9163	63.2704	49.7021	58.414	1.09949	0.1	0.408745	0.972654	1	1
Q640N3	Arhgap30	RHG30	276.695	222.522	238.406	226.773	206.498	179.52	123.751	108.568	133.88	0.866161	0.2	0.528743	0.519077	0.1	0.178349
A6X8Z5	Arhgap31	RHG31	265.47	219.397	203.789	264.811	219.315	208.679	141.02	94.4209	146.67	0.999626	1	1	0.642762	0.1	0.178349
Q811P8	Arhgap32	RHG32	1238.62	1185.2	1026.14	1385.97	1472.24	1420.05	1018.57	964.128	995.135	1.19815	0.1	0.408745	0.839635	0.1	0.178349
Q91YM2	Arhgap35	RHG35	3202.72	3716.44	3506.51	3640.99	3677.76	3610.29	4664.63	5575.76	4721.06	1.03835	0.7	0.870445	1.34637	0.1	0.178349
P59281	Arhgap39	RHG39	145.156	152.672	151.411	157.041	159.398	141.913	126.989	120.828	145.298	1.03718	0.7	0.870445	0.838704	0.2	0.301331
B1AUX5	Arhgap4	B1AUX5	374.626	347.288	316.298	320.508	233.137	262.402	174.486	203.415	218.011	0.755575	0.2	0.528743	0.585724	0.1	0.178349
B2RQE8	Arhgap42	RHG42	90.5195	101.747	87.4241	89.3019	107.701	103.312	94.9209	75.4937	98.9316	1.14132	0.4	0.691041	1.04862	1	1
P97393	Arhgap5	RHG05	2502.48	3189.27	3137.45	3002.32	3538.14	3592.55	4206.26	4363.3	4169.53	1.12771	0.4	0.691041	1.34066	0.1	0.178349
O54834	Arhgap6	RHG06	140.847	143.298	136.54	128.335	135.614	143.344	73.9729	69.3946	64.941	0.962846	0.7	0.870445	0.492695	0.1	0.178349
Q99PT1	Arhgdia	GDIR1	5221.65	4779.15	4920.5	4654.45	5012.47	5128.15	4592.75	3778.93	4359.63	1.01869	1	1	0.886014	0.1	0.178349
Q61599	Arhgdib	GDIR2	7440.97	5498.82	5737.53	5281.16	4775.62	4166.19	2512.51	2172.87	2706.54	0.832348	0.1	0.408745	0.437908	0.1	0.178349
Q61210-5	Arhgef1	ARHG1	3965.84	4362.89	4457.79	4034.48	4610.8	4319.87	4555.29	4464.41	4298.81	0.99014	1	1	1.02327	0.4	0.503145
A2AWP8	Arhgef10l	ARGAL	1413.26	1724.92	1719.69	1677.18	1762.82	1861.69	1772.73	1830.77	1740.14	1.02508	0.4	0.691041	1.03084	0.1	0.178349
E9Q0A3	Arhgef11	E9Q0A3	1320.41	1334.24	1401.29	1682.09	1385.53	1400.33	1404.6	1345.22	1374.19	1.04953	0.4	0.691041	1.02994	0.4	0.503145
Q68FM7	Arhgef11	Q68FM7	72.9497	66.5868	70.8915	98.9781	82.771	71.1724	89.3878	78.1671	60.9724	1.16757	0.2	0.528743	1.10263	0.7	0.771399
Q8R4H2	Arhgef12	ARHGC	1805.58	1785.42	1677	1810.07	1825.41	1774.58	1625.55	1776.99	1607.81	1.01381	0.4	0.691041	0.910458	0.2	0.301331
Q3U5C8	Arhgef16	ARHGG	2983.29	3030.95	3440.59	4609.27	4200.28	4053.14	5681.41	6145.43	6391.93	1.3858	0.1	0.408745	2.02756	0.1	0.178349
Q80U35	Arhgef17	ARHGH	1296.4	1373.59	1339.63	1193.93	1171.35	1344.76	933.735	809.795	893.423	0.891239	0.4	0.691041	0.666918	0.1	0.178349
Q6P9R4	Arhgef18	ARHGI	393.063	495.15	520.225	463.24	498.41	518.372	643.832	773.638	641.442	1.00658	1	1	1.30028	0.1	0.178349
Q60875	Arhgef2	ARHG2	1849.87	1952.83	1992.9	1941.52	1806.61	1734.76	2073.17	2037.95	1894.68	0.925124	0.2	0.528743	1.04359	0.4	0.503145
Q9CWR0	Arhgef25	ARHGP	540.934	623.922	606.971	457.668	506.581	575.196	414.558	413.046	374.809	0.834605	0.2	0.528743	0.680504	0.1	0.178349
D3YYY8	Arhgef26	D3YYY8	207.591	202.078	202.08	185.64	160.496	155.981	146.598	97.9822	140.634	0.79422	0.1	0.408745	0.695932	0.1	0.178349
G5E8P2	Arhgef28	G5E8P2	795.259	795.18	809.553	864.068	874.671	802.307	828.962	796.622	814.908	1.08652	0.2	0.528743	1.02471	0.2	0.301331
Q91X46	Arhgef3	ARHG3	82.968	116.008	95.1631	118.876	121.19	111.207	126.582	100.437	114.276	1.24918	0.2	0.528743	1.20084	0.4	0.503145
Q80VK6	Arhgef38	ARH38	784.751	999.24	1159.24	1105.24	1162.35	1137.55	1939.04	1461.02	1673.26	1.13841	0.4	0.691041	1.67453	0.1	0.178349
Q3UPH7	Arhgef40	ARH40	929.02	931.044	898.206	1190.67	1218.51	1008.15	1638.87	1805.95	1603.06	1.28164	0.1	0.408745	1.76408	0.1	0.178349
E9Q7D5	Arhgef5	E9Q7D5	1875.49	1788.22	1836.48	2129.87	2229.65	2108.75	1996.41	1905.53	1984.77	1.15976	0.1	0.408745	1.08075	0.1	0.178349
Q8K4I3	Arhgef6	ARHG6	3627.39	3539.3	3630.72	3168.57	3068.91	3059.97	2544.6	2551.69	2900.62	0.846038	0.1	0.408745	0.703451	0.1	0.178349
Q9ES28	Arhgef7	ARHG7	2957.69	3246.03	2867.62	3404.29	3159.99	3140.46	3458.3	3167.35	3415.03	1.0684	0.4	0.691041	1.15463	0.2	0.301331
A2BH40	Arid1a	ARI1A	4542.02	4891.93	4687.28	5171.51	5074.11	4481.32	4427.16	4839.49	4886.53	1.08253	0.7	0.870445	1.03247	1	1
E9Q4N7	Arid1b	E9Q4N7	1682.18	1714.9	1575.8	1973.96	1848.42	1784.92	1658.93	1398.04	1543.65	1.09882	0.1	0.408745	0.917649	0.2	0.301331
E9Q7E2	Arid2	E9Q7E2	885.83	978.614	872.526	1062.78	1027.69	953.646	1023.09	987.532	1034.76	1.16014	0.2	0.528743	1.15495	0.1	0.178349
F8VPQ2	Arid4a	F8VPQ2	822.345	934.02	837.106	895.003	913.425	936.267	979.265	834.211	866.144	1.09117	0.4	0.691041	1.03469	0.7	0.771399
A2CG63	Arid4b	ARI4B	1048.5	1100.62	983.078	1105.85	1037.34	1042.26	970.937	753.722	870.827	0.994049	1	1	0.830546	0.1	0.178349
Q8BM75	Arid5b	ARI5B	151.435	139.37	123.889	124.913	136.439	147.095	92.848	65.3846	109.912	0.97897	1	1	0.666198	0.1	0.178349
Q9Z1K5	Arih1	ARI1	2785.89	3068.04	3170.02	3577.2	3409.21	3236.6	4693.54	4603.45	3910.17	1.1112	0.1	0.408745	1.50045	0.1	0.178349
Q9Z1K6	Arih2	ARI2	202.587	282.515	234.31	277.434	282.802	283.27	460.945	383.364	420.153	1.20696	0.2	0.528743	1.79315	0.1	0.178349
P61211	Arl1	ARL1	2221.84	2735.87	2987.23	2643.38	2773.12	2702.52	3282.01	2329.88	2837.26	0.98781	1	1	1.03706	0.7	0.771399
Q9QXJ4	Arl10	ARL10	97.1238	138.224	100.68	120.795	119.402	116.662	138.822	97.2804	134.624	1.18596	0.7	0.870445	1.33715	0.7	0.771399
Q640N2	Arl13b	AR13B	104.551	132.561	111.257	129.764	119.772	115.226	165.195	117.514	132.145	1.07654	0.7	0.870445	1.18775	0.4	0.503145
Q8BIX3	Arl14ep	AL14E	361.595	407.872	344.425	405.88	354.937	335.161	345.314	319.554	358.32	0.981587	0.7	0.870445	0.954974	0.4	0.503145
Q9D0J4	Arl2	ARL2	1729.76	2368.4	2066.53	1893.1	2083.05	1891.73	2242.7	1781.93	2185.22	0.916077	1	1	1.05743	1	1
Q9D385	Arl2bp	AR2BP	887.93	817.022	779.311	935.728	855.621	752.334	822.198	536.443	627.055	1.04724	1	1	0.767489	0.4	0.503145
Q9WUL7	Arl3	ARL3	3719.87	3257.77	3475.8	3063.42	2941.98	3057.55	2539.41	1776.74	1701.93	0.879668	0.1	0.408745	0.511174	0.1	0.178349
Q80ZU0	Arl5a	ARL5A	55.1962	56.8403	73.3123	51.0003	60.6515	54.7959	88.6107	33.6954	44.8096	0.964033	0.4	0.691041	0.788342	0.7	0.771399
O88848	Arl6	ARL6	486.027	599.111	468.315	499.411	537.875	487.764	433.745	349.718	406.503	1.02754	0.7	0.870445	0.836379	0.1	0.178349
Q9JM93	Arl6ip4	AR6P4	485.869	531.012	503.581	450.288	564.818	646.483	434.411	387.762	380.394	1.1216	0.7	0.870445	0.770009	0.1	0.178349
Q8R5J9	Arl6ip5	PRAF3	1746.28	1954	2453.16	1353.69	1743.62	1886.92	1338.78	893.97	1560.56	0.892334	0.2	0.528743	0.685148	0.1	0.178349
Q8VEH3	Arl8a	ARL8A	527.57	562.505	592.138	491.5	494.817	440.29	531.963	422.195	485.578	0.87377	0.1	0.408745	0.863242	0.2	0.301331
Q9CQW2	Arl8b	ARL8B	1576.79	1969.08	1873.11	1740.87	1835.96	1749.08	2025.58	1689.67	1811.2	0.933784	0.7	0.870445	0.966948	1	1
Q9D7A8	Armc1	ARMC1	1267.06	1531.67	1511.42	1590.31	1622.69	1457.96	1505.7	1293.17	1436.99	1.0522	0.4	0.691041	0.950755	0.7	0.771399
Q9D0L7	Armc10	ARM10	829.633	977.213	995.813	842.865	1013.14	913.31	1247.03	1397.84	1106.34	0.934607	1	1	1.27611	0.1	0.178349
Q8BNU0	Armc6	ARMC6	1584.55	1716.65	1843.44	1695.99	1727.37	1967.57	1906.94	1722.42	1798.65	1.00625	0.7	0.870445	1.04777	0.4	0.503145
G3X920	Armc8	G3X920	2409.3	2910.95	3214.6	2323.76	2987.54	3181.71	2910.74	2718.48	3001.34	1.02631	1	1	0.999928	1	1
Q6A058	Armcx2	ARMX2	33.5192	49.3618	45.1537	29.9798	37.7253	43.6679	33.1075	28.6207	28.8082	0.835486	0.4	0.691041	0.638003	0.1	0.178349
Q8BHS6	Armcx3	ARMX3	358.828	381.838	451.774	364.392	413.575	395.741	537.91	446.457	416.131	1.03641	1	1	1.16923	0.4	0.503145
P53762	Arnt	ARNT	159.161	185.652	167.014	176.809	161.417	141.398	159.024	141.536	157.202	0.966488	0.7	0.870445	0.94125	0.1	0.178349
Q9R0Q6	Arpc1a	ARC1A	455.617	537.057	465.327	454.477	438.868	475.312	390.967	295.853	422.568	0.976683	0.4	0.691041	0.840198	0.1	0.178349
Q9WV32	Arpc1b	ARC1B	4370.3	5253.78	5388.7	4104.99	5346.3	5387.2	5025.11	4728.13	4992.53	1.01761	1	1	0.950274	0.7	0.771399
Q9CVB6	Arpc2	ARPC2	4542.83	5490.47	5731.29	5576.66	6527.67	6251.48	8521.24	10413.9	7908.09	1.13861	0.2	0.528743	1.55201	0.1	0.178349
Q9JM76	Arpc3	ARPC3	2393.54	2832.95	2477.77	2323.03	2449.91	3373.59	3049.32	4035.44	3072.08	0.988756	1	1	1.23986	0.1	0.178349
P59999	Arpc4	ARPC4	1666.65	1981.88	2076.45	1771.52	2074.35	1828.2	2298.59	1734.1	2194.17	0.922457	1	1	1.10712	0.4	0.503145
Q9CPW4	Arpc5	ARPC5	6253.52	5584.49	5319.71	5648.24	5665.86	5396.98	5709.72	5832.73	6339.85	1.01142	1	1	1.04445	0.4	0.503145
Q9D898	Arpc5l	ARP5L	2396.78	2189.71	2206.57	2287.76	2216.18	1702.04	2024.9	1913.96	2038.11	1.00436	1	1	0.917669	0.1	0.178349
Q9D0A3	Arpin	ARPIN	4234.61	3434.71	3660.78	4384.72	4118.2	3568.59	3322.98	3755.44	3390.65	1.12495	0.7	0.870445	0.92621	0.4	0.503145
P56212	Arpp19	ARP19	285.153	287.86	248.174	349.816	356.034	293.154	172.721	79.4241	222.391	1.22677	0.1	0.408745	0.605713	0.1	0.178349
Q8BWG8	Arrb1	ARRB1	2264.86	2689.84	2406.97	1961.82	1876.29	2067.52	2066.45	1461.18	1637.25	0.815058	0.1	0.408745	0.680212	0.1	0.178349
Q91YI4	Arrb2	ARRB2	107.184	138.384	118.832	103.211	114.501	130.599	113.718	78.8248	110.207	0.963554	0.7	0.870445	0.927419	0.4	0.503145
Q99KN1	Arrdc1	ARRD1	43.7714	35.0108	33.7775	44.9994	51.6032	39.9463	71.3549	68.7417	66.7293	1.2853	0.2	0.528743	1.96344	0.1	0.178349
P50428	Arsa	ARSA	819.979	697.23	645.578	668.722	700.866	638.388	596.306	555.24	519.385	0.959112	0.7	0.870445	0.796351	0.1	0.178349
P50429	Arsb	ARSB	1576.87	1342.73	1446.1	1596.83	1398.89	1290.22	1384.62	1259.2	1468.29	0.967354	1	1	0.957486	0.7	0.771399
O35975	Art2b	NAR2B	50.6755	45.3067	46.5047	58.8113	46.9514	62.216	68.0455	114.087	59.3393	1.26463	0.2	0.528743	1.4632	0.1	0.178349
Q8R2G4	Art3	NAR3	986.157	906.947	773.402	689.459	523.535	712.075	508.311	410.117	572.044	0.760198	0.1	0.408745	0.560464	0.1	0.178349
P98203	Arvcf	ARVC	293.332	302.917	255.163	217.359	307.722	305.627	228.595	212.099	215.739	1.04191	0.7	0.870445	0.735477	0.1	0.178349
Q91WU5	As3mt	AS3MT	8338.1	7840.16	8437.27	9063.99	7936	7344.98	8290.01	5703.33	7289.62	0.951776	1	1	0.874254	0.2	0.301331
Q9WV54	Asah1	ASAH1	3728.69	3522.51	3187.09	3115.29	2944.71	3819.06	2775.69	3349.55	3391.11	0.884395	0.7	0.870445	0.950899	0.4	0.503145
Q9QWY8	Asap1	ASAP1	1162.15	1279.15	1204.72	1263.32	1205.81	1172.86	1240.71	1138.31	1277.26	1.0009	1	1	1.02987	1	1
Q7SIG6	Asap2	ASAP2	1638	1525.71	1422.93	1770.6	1963	1919.07	1444.41	1335.66	1580.92	1.25782	0.1	0.408745	0.946713	0.7	0.771399
Q91ZU1	Asb6	ASB6	95.5049	100.194	93.0811	98.4939	100.861	114.892	114.885	113.257	96.4207	1.05608	0.2	0.528743	1.18588	0.2	0.301331
Q9D8Z1	Ascc1	ASCC1	132.812	153.27	170.838	169.377	192.47	186.973	231.944	223.302	194.732	1.21989	0.2	0.528743	1.45692	0.1	0.178349
Q91WR3	Ascc2	ASCC2	1583.8	1674.97	1744.87	1900.36	1965.06	1981.56	2041.39	2135.28	1916.19	1.17319	0.1	0.408745	1.21876	0.1	0.178349
E9PZJ8	Ascc3	ASCC3	2284.29	2844.52	3039.28	2745.88	3218.91	3169.24	3954.24	3900.28	3600.84	1.11416	0.4	0.691041	1.37116	0.1	0.178349
Q9CQE6	Asf1a	ASF1A	846.985	905.723	811.12	935.94	1065.86	1008.24	838.535	532.975	744.975	1.19039	0.1	0.408745	0.879561	0.2	0.301331
Q9DAP7	Asf1b	ASF1B	167.931	173.798	184.813	209.165	207.691	225.191	194.139	151.913	180.988	1.20349	0.1	0.408745	1.04137	1	1
Q99MY8	Ash1l	ASH1L	71.4568	77.8052	65.2772	80.8645	91.6367	88.1726	85.106	78.9011	84.861	1.23393	0.1	0.408745	1.18758	0.1	0.178349
Q91X20	Ash2l	ASH2L	3856.92	3665.55	3552.38	4016.56	4205.8	3570.55	3447.72	3467.29	3639.02	1.09576	0.4	0.691041	0.945913	0.2	0.301331
Q91YI0	Asl	ARLY	3635.46	4497.52	4628.38	3787.71	4005.8	5283.47	5834.65	7446.28	6258.1	0.890669	1	1	1.39146	0.1	0.178349
O54984	Asna1	ASNA	3533.53	3826.8	3474.63	3295.23	3334.42	3709.78	3438.76	2384.76	2934.37	0.943651	0.4	0.691041	0.830436	0.1	0.178349
Q61024	Asns	ASNS	4490.5	5495.07	5546.01	5908.31	5553.36	5697.59	5994.63	6594.64	5660.22	1.03686	0.1	0.408745	1.09091	0.1	0.178349
Q8R3P0	Aspa	ACY2	1386.43	1738.63	1478.57	1081.27	1208.59	1384.38	816.709	704.369	837.95	0.817405	0.1	0.408745	0.552364	0.1	0.178349
A0JNU3	Aspg	LPP60	404.502	402.926	344.031	400.924	324.745	482.954	340.86	254.546	246.676	0.995031	1	1	0.631744	0.1	0.178349
Q8BSY0	Asph	ASPH	4542.27	5061.79	5094.41	4235.63	4612.98	4536.42	4967.13	5723.2	5157.64	0.896209	0.2	0.528743	1.01894	0.4	0.503145
Q99MQ4	Aspn	ASPN	6099.31	5211.15	5236.1	3453.98	3422.39	3599.82	2715.2	3349.74	3677.63	0.659647	0.1	0.408745	0.63974	0.1	0.178349
Q8VBT9	Aspscr1	ASPC1	2302.78	1936.27	2031.2	2320.68	2020.5	1879.17	1778.69	1798.58	1844.56	0.994732	1	1	0.885477	0.1	0.178349
Q8C0M9	Asrgl1	ASGL1	4866.79	4104.87	4149.93	3303.55	3174.95	2919.9	2244.13	2278.57	2451.76	0.765061	0.1	0.408745	0.549062	0.1	0.178349
P16460	Ass1	ASSY	6508.29	7736.43	7442.19	7482.26	6170.32	6030.24	6886.21	9851.43	7058.81	0.8291	0.4	0.691041	0.948486	1	1
Q8QZV7	Asun	ASUN	2389.04	2457.29	2379.42	2719.99	2487.1	2381.1	2747.41	2136.19	2271.56	1.04105	0.4	0.691041	0.950825	0.7	0.771399
Q8BZ32	Asxl2	ASXL2	497.618	426.836	451.742	487.633	514.806	513.495	359.19	379.106	305.578	1.1367	0.2	0.528743	0.795122	0.1	0.178349
Q9D5T0	Atad1	ATAD1	1909.26	2428.12	2597.35	2178.28	2471.4	2458.47	2904.27	2703.53	2651.19	1.0125	1	1	1.11343	0.1	0.178349
G3X963	Atad2	G3X963	1326.77	1574.74	1396.8	1625.52	1308.14	1585.1	1529.4	1421.96	1466.05	1.13481	0.7	0.870445	1.04958	0.7	0.771399
E9Q166	Atad2b	E9Q166	1108.91	1205.4	1122.56	1484.77	1328.9	1285.42	1684.74	1473.81	1500.67	1.18381	0.1	0.408745	1.33683	0.1	0.178349
Q925I1	Atad3	ATAD3	1964.76	2505.63	2428.84	2577.19	2568.43	2529.09	3656.14	3840.72	3400.9	1.05747	0.1	0.408745	1.5053	0.1	0.178349
Q4QY64	Atad5	ATAD5	110.532	111.045	88.7677	161.803	130.152	136.904	108.473	86.7296	98.7009	1.23859	0.1	0.408745	0.892962	0.4	0.503145
Q9Z2A5	Ate1	ATE1	2025.71	2079.57	1972.93	2027.07	1886.42	2231.69	1731.01	1590.46	1614.47	1.00067	1	1	0.79699	0.1	0.178349
P81269	Atf1	ATF1	162.113	176.633	107.728	193.563	203.391	173.467	61.0004	22.8317	72.3348	1.194	0.2	0.528743	0.376283	0.1	0.178349
P16951	Atf2	ATF2	159.537	143.66	133.524	163.87	182.572	138.79	110.337	142.069	124.461	1.14068	0.4	0.691041	0.866358	0.2	0.301331
Q60765	Atf3	ATF3	210.1	159.047	172.35	183.484	168.088	148.524	130.037	156.56	137.601	0.975271	0.7	0.870445	0.798381	0.1	0.178349
Q3TZR9	Atf7	Q3TZR9	1275.27	1090.86	1142.59	1176.32	1125.12	1429.72	884.216	1132.12	1026.11	1.02952	0.7	0.870445	0.898056	0.2	0.301331
Q7TT18	Atf7ip	MCAF1	1973.43	1812.6	1740.32	2052.49	1997.94	1872.24	1307.07	942.118	1178.22	1.10225	0.2	0.528743	0.650017	0.1	0.178349
Q8R1P4	Atg10	ATG10	56.9734	46.5371	41.049	43.0479	50.2193	50.8813	52.2912	38.6948	45.5257	1.07912	1	1	0.978267	0.7	0.771399
Q9D8Z6	Atg101	ATGA1	23.5629	27.5529	23.9289	25.9056	25.0312	31.1523	30.9059	21.0079	20.9505	1.08261	0.4	0.691041	0.87793	0.7	0.771399
Q9CQY1	Atg12	ATG12	1519.97	1532.32	1637.27	1624.22	1868.3	1778.34	1441.96	1149.21	1349.6	1.16055	0.2	0.528743	0.880756	0.1	0.178349
Q91YI1	Atg13	ATG13	114.385	101.128	90.4297	116.75	114.016	102.911	68.8622	86.224	84.3004	1.12744	0.4	0.691041	0.833601	0.1	0.178349
Q8C0J2	Atg16l1	A16L1	1896.85	2303.46	2143.78	2134.04	2216.59	2311.14	2677.94	2174.38	2372.43	1.03396	0.7	0.870445	1.10666	0.2	0.301331
Q6KAU8	Atg16l2	A16L2	78.6886	78.1901	67.5129	73.9543	78.2618	64.4289	68.7164	79.8816	71.8292	0.945827	0.7	0.870445	0.918648	1	1
Q6P4T0	Atg2a	ATG2A	630.918	733.273	664.537	859.358	673.655	741.701	780.07	608.548	645.057	1.11612	0.2	0.528743	0.970686	1	1
Q80XK6	Atg2b	ATG2B	1071.21	1150.42	1081.93	1217.68	1123	1088.91	1221.57	1347.8	1108.47	1.03796	0.4	0.691041	1.12907	0.2	0.301331
Q9CPX6	Atg3	ATG3	2145.5	1615.12	1869.36	1790	1628.47	2046.14	1496.43	1951.46	1649.36	0.957547	1	1	0.882313	0.7	0.771399
Q8C9S8	Atg4a	ATG4A	836.033	895.496	788.734	992.006	828.468	862.807	1022.91	897.681	756.114	1.03202	0.7	0.870445	1.07374	0.7	0.771399
Q8BGE6	Atg4b	ATG4B	302.078	403.256	382.089	404.038	415.787	380.578	551.223	655.482	495.912	1.05744	0.4	0.691041	1.44266	0.1	0.178349
Q99J83	Atg5	ATG5	1369.3	1427.19	1384.19	1444.43	1450.02	1324.56	1588.2	1217.3	1450.15	1.04352	0.7	0.870445	1.04765	0.7	0.771399
Q9D906	Atg7	ATG7	1481.71	1612.28	1790.57	1652.6	1609.32	1740.01	1916.34	2431.12	1800.73	1.02501	1	1	1.18859	0.1	0.178349
Q8BP56	Athl1	ATHL1	757.983	728.974	667.82	729.328	738.688	717.116	670.939	598.898	693.739	1.00049	1	1	0.920388	0.4	0.503145
Q9CWJ9	Atic	PUR9	11225.1	10491.1	10946.6	11983.9	10512.6	10443.6	11137.8	9821.27	10387.5	0.960353	1	1	0.948925	0.4	0.503145
Q8BH66	Atl1	ATLA1	93.1443	120.735	114.237	54.2952	91.8903	116.854	89.5071	73.5664	89.1023	0.804383	0.4	0.691041	0.779978	0.1	0.178349
Q6PA06	Atl2	ATLA2	1533.58	1973.98	1940.86	1672.54	2086.16	2047.03	2383.69	2939.74	2312.88	1.0547	0.4	0.691041	1.22816	0.1	0.178349
Q91YH5	Atl3	ATLA3	5416.44	6838.9	7164.93	5027.62	6496.33	6846.52	6910.09	6447.5	7086.35	0.949909	0.7	0.870445	1.01041	1	1
Q62388	Atm	ATM	247.327	371.696	306.066	269.415	312.279	301.203	339.974	239.34	345.465	0.984111	1	1	1.11079	1	1
P48985	Atoh1	ATOH1	385.059	408.77	365.152	415.543	376.718	309.652	224.558	251.817	238.788	0.978338	1	1	0.620134	0.1	0.178349
O08997	Atox1	ATOX1	3998.57	3276.16	3793.34	3992.05	3907.2	3188.26	3809.69	3499.69	4019.16	1.03002	1	1	1.00431	0.7	0.771399
B1AWN4	Atp10b	B1AWN4	41.7909	48.2955	53.2425	48.9068	64.2894	50.442	65.174	79.269	88.1117	1.04445	0.4	0.691041	1.64133	0.1	0.178349
P98197	Atp11a	AT11A	38.1313	49.9851	42.9911	51.2164	41.4198	59.0722	43.2875	51.9475	45.0826	1.19133	0.4	0.691041	1.04865	0.4	0.503145
E9Q0M7	Atp11b	E9Q0M7	145.122	172.266	180.489	160.944	170.73	219.727	205.172	170.506	204.216	0.991084	1	1	1.18547	0.4	0.503145
Q9QZW0	Atp11c	AT11C	131.019	163.497	161.991	146.614	142.041	171.687	171.778	186.877	173.147	0.905075	1	1	1.06887	0.1	0.178349
Q9Z1W8	Atp12a	AT12A	4833.69	6080.49	6649	5842.8	4868.69	7276.19	4055.71	7282.68	5341.98	0.960909	1	1	0.878544	1	1
Q9EPE9	Atp13a1	AT131	5012.31	6189.89	5983.96	4890.64	5266.86	5904.69	6253.25	4972.89	5908.68	0.880163	0.4	0.691041	0.98742	1	1
Q5XF89	Atp13a3	AT133	326.072	375.455	348.004	360.121	387.21	363.499	461.475	419.167	379.198	1.04452	0.4	0.691041	1.20449	0.1	0.178349
Q8VDN2	Atp1a1	AT1A1	22609.6	27942.5	30595.8	23084.9	25118.6	30807.6	28656.7	32388.8	30044.3	0.898939	1	1	1.07522	0.4	0.503145
Q6PIE5	Atp1a2	AT1A2	741.473	761.798	666.443	605.504	507.175	678.126	568.062	696.952	603.332	0.816623	0.2	0.528743	0.813694	0.2	0.301331
Q6PIC6	Atp1a3	AT1A3	169.2	157.828	133.078	113.892	101.762	119.813	104.878	126.301	112.44	0.721621	0.1	0.408745	0.712421	0.1	0.178349
Q9WV27	Atp1a4	AT1A4	1004.98	1374.81	1311.89	1005.93	1158.21	1330.48	1311.4	976.301	1408.09	0.882856	1	1	0.999626	1	1
P14094	Atp1b1	AT1B1	11503.4	11709.4	13899.7	10101.4	10967.6	12882.1	9727.42	8803.24	9593.94	0.936649	0.4	0.691041	0.819337	0.1	0.178349
P97370	Atp1b3	AT1B3	621.261	623.803	555.953	480.84	461.693	536.559	490.292	455.917	456.067	0.773974	0.1	0.408745	0.734099	0.1	0.178349
O55143	Atp2a2	AT2A2	10580.7	13322.6	13713.9	10584.3	11735.8	13313.4	14784.7	15314.1	14226.7	0.880894	0.7	0.870445	1.10975	0.1	0.178349
Q64518	Atp2a3	AT2A3	9924.1	12955.3	13592.1	10547.3	10849.3	12714.9	14171.9	14048.6	13816.6	0.837441	0.7	0.870445	1.08439	0.1	0.178349
G5E829	Atp2b1	G5E829	1956.93	2095.87	1831.97	1436.2	1778.75	2076.03	2250.15	2125.45	2024.1	0.908949	0.4	0.691041	1.08611	0.2	0.301331
E9Q828	Atp2b4	E9Q828	7116.92	8895.64	9023.91	5558.89	6076.02	8108.41	5346.12	4362.37	5353.26	0.683033	0.2	0.528743	0.600982	0.1	0.178349
Q80XR2	Atp2c1	AT2C1	1975.45	2812.33	2875.23	2020.04	1915.63	2321.73	2762.09	1790.87	2341.74	0.71828	0.4	0.691041	0.832669	0.4	0.503145
A7L9Z8	Atp2c2	AT2C2	1140.19	1234.38	1414.26	1085.62	1168.52	1339.54	1123.77	1262.66	1053.65	0.946645	0.7	0.870445	0.910392	0.4	0.503145
Q03265	Atp5a1	ATPA	38757.1	42986.8	40270.1	41600.5	40874.1	39505.4	46213.6	45590.4	46469.7	1.015	1	1	1.14759	0.1	0.178349
P56480	Atp5b	ATPB	37327.3	33810.4	33331.7	37103.2	33384.7	32561.8	34649.8	29459.7	34540.1	0.987409	0.7	0.870445	1.02158	1	1
Q91VR2	Atp5c1	ATPG	4017.94	5653.62	6083.89	5120.04	5844.79	6197.82	8500.49	8605.56	8528.13	1.03381	0.7	0.870445	1.50844	0.1	0.178349
Q9D3D9	Atp5d	ATPD	2099.39	1692.09	1762.32	2202.32	1823.02	1499.85	1278.33	890.383	1385.91	1.03444	1	1	0.725368	0.1	0.178349
P56382	Atp5e	ATP5E	225.069	341.437	341.098	364.1	335.02	261.32	682.005	540.19	581.768	0.982181	1	1	1.70557	0.1	0.178349
Q9CQQ7	Atp5f1	AT5F1	4860.4	5894.03	6738.66	4424.34	5407.22	6828.84	5872.61	6371.49	6008.98	0.917406	1	1	1.0195	1	1
P56383	Atp5g2	AT5G2	62.0751	66.393	58.102	34.2841	86.896	95.1204	62.8723	74.6853	76.3072	1.39985	0.7	0.870445	1.20314	0.2	0.301331
Q9DCX2	Atp5h	ATP5H	9460.47	7601.49	7800.91	8767.36	8621.1	8554.22	7399.04	8211.51	7857.01	1.10514	0.7	0.870445	1.00719	1	1
Q06185	Atp5i	ATP5I	2909.89	2574.26	2656.21	2554.84	2852.9	2360.22	2127.47	1802.69	2211.64	0.961837	0.4	0.691041	0.800942	0.1	0.178349
P97450	Atp5j	ATP5J	3856.05	2715.9	2927.84	3229.32	3977.88	2676.46	3612.41	4274.29	3615.42	1.10297	1	1	1.23484	0.4	0.503145
P56135	Atp5j2	ATPK	160.698	218.732	247.861	217.257	229.714	223.524	293.518	266.796	296.472	1.02191	1	1	1.34191	0.1	0.178349
Q9CPQ8	Atp5l	ATP5L	3249.59	4181.23	4701.44	3097.69	4270.97	4188.73	3820.26	2402.55	4320.44	1.00179	1	1	0.913669	0.7	0.771399
Q9DB20	Atp5o	ATPO	5242.87	5072.69	4801.35	4801.85	5384.52	5262.46	5257.82	6722.35	6257.24	1.03741	0.4	0.691041	1.23351	0.1	0.178349
Q9CRA7	Atp5s	ATP5S	1973.02	1738.11	1710.99	1839.74	1933.26	1712.26	2001.66	2220.21	1890.47	1.05847	1	1	1.15163	0.2	0.301331
Q9D7K5	Atp5sl	AT5SL	840.618	715.835	768.484	743.581	871.483	766.497	624.843	579.984	625.137	0.997414	1	1	0.813085	0.1	0.178349
Q9R1Q9	Atp6ap1	VAS1	1304.71	1133.14	1068.44	1266.55	1214.6	991.524	1035.42	1141.54	1132.4	1.07189	1	1	0.999347	0.7	0.771399
Q9CYN9	Atp6ap2	RENR	665.138	721.83	619.639	674.411	633.579	591.069	688.86	557.86	710.384	0.952553	0.7	0.870445	1.03567	1	1
Q9Z1G4	Atp6v0a1	VPP1	2010.92	2199.95	2116.34	2472.24	2188.79	2310.97	2616.34	3092.67	2676.19	1.09197	0.2	0.528743	1.26454	0.1	0.178349
P15920	Atp6v0a2	VPP2	1619.36	1970.87	2301.62	1481.98	2069.56	2318.26	2250.26	1447.23	2146.55	1.05007	1	1	1.08914	1	1
P63082	Atp6v0c	VATL	95.038	122.683	115.097	100.183	94.9159	99.5715	131.559	85.7923	109.571	0.865109	0.4	0.691041	0.951988	1	1
P51863	Atp6v0d1	VA0D1	3825.55	4078.22	4310.59	3294.22	3966.5	4290.88	3608.04	3449	3820.71	0.972606	0.7	0.870445	0.88471	0.1	0.178349
P50516	Atp6v1a	VATA	7144.06	7955.02	7825.61	6918.11	7289.38	7527.55	7547.74	7448.97	7654.63	0.931478	0.4	0.691041	0.964492	0.7	0.771399
P62814	Atp6v1b2	VATB2	4654.54	4480.76	4461.34	4610.86	4301.92	4449.2	4144.2	3980.11	4126.45	0.992957	0.4	0.691041	0.920926	0.1	0.178349
Q9Z1G3	Atp6v1c1	VATC1	2941.59	3650.17	3551.84	2875.79	3150.85	3247.27	3313.95	3374.51	3367.12	0.887104	0.4	0.691041	0.947993	0.7	0.771399
P57746	Atp6v1d	VATD	972.836	1175.16	1463	1145.92	1384.37	1113.03	2112.21	2119.53	2099.69	0.975118	1	1	1.79738	0.1	0.178349
P50518	Atp6v1e1	VATE1	4583.68	4620.4	4599.1	4116.58	4660.75	4322.52	4309.64	5667.92	5046.67	0.939862	0.7	0.870445	1.09732	0.7	0.771399
Q9D1K2	Atp6v1f	VATF	6207.15	1584.9	7568.01	7883.74	1792.66	4384.12	3514.68	3680.74	4102.11	0.706302	1	1	0.592984	0.7	0.771399
Q9CR51	Atp6v1g1	VATG1	308.008	286.291	283.675	205.192	263.896	456.978	196.651	134.947	204.942	0.921775	0.7	0.870445	0.686892	0.1	0.178349
Q8BVE3	Atp6v1h	VATH	2378.49	3098.49	3370.62	2278.6	2795.38	3539.16	3590.57	3853.59	3821.07	0.902175	1	1	1.2332	0.1	0.178349
Q64430	Atp7a	ATP7A	1842.78	2175.35	2086.15	2244.33	2066.34	2216.01	2445.87	2375.73	2295.75	1.06225	0.4	0.691041	1.13881	0.1	0.178349
A2AG68	Atp7a	A2AG68	375.082	428.821	431.574	472.77	443.895	478.969	473.348	436.573	446.84	1.10249	0.1	0.408745	1.04202	0.1	0.178349
P70704	Atp8a1	AT8A1	727.432	901.627	804.464	743.757	851.439	872.699	921.778	749.372	889.595	1.05839	1	1	1.10582	0.7	0.771399
Q148W0	Atp8b1	AT8B1	1872.14	2340.12	2543.36	2038.85	2629.62	2555.51	2785.91	3541.77	2827.74	1.09204	0.4	0.691041	1.20837	0.1	0.178349
O70228	Atp9a	ATP9A	687.383	830.477	905.355	672.023	941.157	998.145	822.664	711.051	819.193	1.13327	0.7	0.870445	0.986413	0.7	0.771399
P98195	Atp9b	ATP9B	69.7635	77.8755	69.7087	101.463	99.988	87.8564	115.183	124.122	112.86	1.43324	0.1	0.408745	1.65105	0.1	0.178349
Q811I0	Atpaf1	ATPF1	900.559	1029.76	863.242	991.099	1017.62	982.504	1068.38	866.696	991.077	1.10054	0.7	0.870445	1.10051	0.7	0.771399
Q91YY4	Atpaf2	ATPF2	372.289	412.232	390.007	365.937	438.939	455.944	472.331	285.765	373.867	1.12546	0.7	0.870445	0.958616	1	1
O35143	Atpif1	ATIF1	863.324	701.131	619.356	600.509	531.321	1066.24	700.383	982.931	917.416	0.856486	0.7	0.870445	1.30848	0.4	0.503145
Q6A051	Atrnl1	ATRN1	154.054	150.607	141.06	162.984	197.453	197.108	168.609	183.177	172.235	1.30876	0.1	0.408745	1.14361	0.1	0.178349
Q61687	Atrx	ATRX	4247.29	4328.16	4448.57	4042.92	4235.26	4372.02	4110.9	3641.53	3987.69	0.978536	0.4	0.691041	0.921336	0.1	0.178349
P54254	Atxn1	ATX1	330.266	356.677	299.551	474.672	364.078	279.81	378.401	286.75	347.515	1.10238	0.7	0.870445	1.05223	1	1
P28658	Atxn10	ATX10	1748.01	1873.56	1780.69	1189.22	1832.66	2074.85	1830.84	1455.03	1397.01	1.02919	1	1	0.817116	0.4	0.503145
P0C7T6	Atxn1l	ATX1L	225.962	201.485	187.656	224.146	209.856	258.038	143.765	199.877	140.428	1.11247	0.4	0.691041	0.713527	0.2	0.301331
O70305	Atxn2	ATX2	3826.69	3624.56	3443.32	3847.84	3549.09	3584.5	2768.82	2273.38	2588.32	0.988948	1	1	0.714106	0.1	0.178349
F6V8M6	Atxn2	F6V8M6	32.1776	30.6778	19.0583	25.0524	33.1683	48.6729	11.713	7.23918	12.6537	1.08118	0.4	0.691041	0.381807	0.1	0.178349
Q7TQH0-2	Atxn2l	ATX2L	4948.37	4659.34	4408.44	5672.85	5165.51	4881.46	4083.01	3790.04	4160.04	1.10864	0.2	0.528743	0.876307	0.1	0.178349
Q9CVD2	Atxn3	ATX3	960.354	940.55	831.948	1049.12	1123.39	1030.17	948.203	731.551	783.467	1.11543	0.1	0.408745	0.832988	0.4	0.503145
B2RW07	Atxn7l1	B2RW07	86.4819	77.9738	59.2322	79.1154	101.295	75.9588	76.2909	98.0638	60.1775	1.01464	0.7	0.870445	0.978417	1	1
Q3UD01	Atxn7l3b	A7L3B	386.4	320.35	296.853	413.857	375.987	416.489	214.244	166.657	203.407	1.29189	0.2	0.528743	0.634952	0.1	0.178349
D3YU88	AU019823	D3YU88	179.86	170.39	192.184	201.598	188.213	200.961	164.108	130.083	120.848	1.11732	0.2	0.528743	0.723246	0.1	0.178349
Q9JLZ3	Auh	AUHM	1852.78	1765.18	1799.92	1631.37	1528.66	1602.77	1649.38	1281.28	1549.01	0.890467	0.1	0.408745	0.860599	0.1	0.178349
P70295	Aup1	AUP1	1190.17	1445.4	1429.59	1242.35	1328.11	1529	1463.16	1421.45	1447.6	0.929015	1	1	1.0126	0.4	0.503145
O70126	Aurkb	AURKB	195.835	249.269	258.709	415.906	305.723	316.716	306.297	347.081	309.358	1.27058	0.1	0.408745	1.24106	0.1	0.178349
Q9D9K3	Aven	AVEN	408.838	344.057	345.768	457.701	456.066	418.804	334.899	335.108	359.622	1.31899	0.1	0.408745	0.96917	0.4	0.503145
O88398	Avil	AVIL	1692.05	1802.8	1216.04	1571.05	1495.25	1737.24	1532.92	1544.42	1681.9	0.928489	1	1	0.912751	0.7	0.771399
Q80U56	Avl9	AVL9	1229.76	1476.09	1416.41	1510.96	1550.86	1524.71	2134.02	1756.84	1937.23	1.07646	0.1	0.408745	1.3677	0.1	0.178349
Q8BGF0	AW551984	Q8BGF0	208.43	192.49	165.468	188.274	157.875	160.928	109.044	119.7	132.366	0.836033	0.2	0.528743	0.62185	0.1	0.178349
O35625	Axin1	AXIN1	342.146	285.557	298.723	406.998	333.853	307.469	317.113	337.859	338.49	1.1176	0.4	0.691041	1.13101	0.7	0.771399
Q00993	Axl	UFO	222.647	221.107	197.661	216.612	203.024	209.653	220.589	210.682	208.875	0.948197	0.7	0.870445	0.952851	0.7	0.771399
Q64726	Azgp1	ZA2G	2629.98	1916.67	1469.93	1402.93	1358.9	1205.47	1073.25	1087.24	1108.33	0.70899	0.1	0.408745	0.567255	0.1	0.178349
Q9QYP6	Azi2	AZI2	656.703	560.518	540.713	666.742	711.923	587.052	611.244	581.716	603.473	1.18951	0.2	0.528743	1.07663	0.7	0.771399
P01887	B2m	B2MG	2288.76	2254.11	2001.52	2015.7	1858.34	1835.17	1322.77	1094.03	1293.03	0.824423	0.2	0.528743	0.573632	0.1	0.178349
O54905	B3galt2	B3GT2	91.5249	117.849	129.463	98.1975	171.974	169.516	168.08	119.788	157.841	1.43842	0.4	0.691041	1.33935	0.2	0.301331
Q9JI67	B3galt5	B3GT5	1000.91	1111.5	1285.59	927.819	1114.18	1163.38	1176.97	844.969	1120.19	1.00241	1	1	1.00782	1	1
Q91Z92	B3galt6	B3GT6	80.1236	107.653	130.084	103.822	111.754	106.636	121.933	159.798	114.004	0.990553	1	1	1.13265	0.4	0.503145
Q8BHT6	B3galtl	B3GLT	1177.89	1443.64	1289.03	1214.51	1117.6	1269.28	1356.9	1183.01	1191.65	0.942189	0.4	0.691041	0.924455	1	1
Q8BWP8	B3gnt1	B3GN1	294.766	342.613	273.234	208.751	304.13	244.873	279.045	151.692	266.518	0.830737	0.4	0.691041	0.904168	0.2	0.301331
Q9Z222	B3gnt2	B3GN2	393.348	467.671	445.524	384.157	461.352	512.005	512.31	534.362	568.295	1.03553	1	1	1.1994	0.1	0.178349
Q5JCS9	B3gnt3	B3GN3	261.536	297.96	284.194	286.224	295.131	283.312	334.684	485.198	326.017	1.00714	1	1	1.17766	0.1	0.178349
Q8BGY6	B3gnt5	B3GN5	97.6551	125.599	130.25	116.288	166.55	142.195	177.426	216.357	176.054	1.13213	0.4	0.691041	1.41264	0.1	0.178349
Q8K0J2	B3gnt7	B3GN7	2986.17	3155.67	4541.42	3370.48	3605.01	3510.33	3548.8	4845.79	3558.3	1.11239	0.7	0.870445	1.12759	0.4	0.503145
Q09200	B4galnt1	B4GN1	1223.21	1631.24	1589.44	1642.79	1653.95	1533.39	2459.71	1855.55	1985.47	1.03357	0.4	0.691041	1.24916	0.1	0.178349
Q09199	B4galnt2	B4GN2	7071.45	8865.64	9749.33	6073.82	6803.1	9527.17	7441.57	5548.64	7006.08	0.767356	0.4	0.691041	0.790251	0.2	0.301331
P15535	B4galt1	B4GT1	762.777	761.541	702.243	605.665	567.184	1338.43	673.547	961.462	896.126	0.795315	0.7	0.870445	1.17673	0.7	0.771399
Q91YY2	B4galt3	B4GT3	23.5401	21.4973	24.0198	21.5134	21.1449	11.9238	24.369	27.8499	22.2287	0.89825	0.2	0.528743	1.03521	0.4	0.503145
Q9JJ04	B4galt4	B4GT4	786.053	947.84	999.438	841.225	974.158	766.778	1467.41	1075	974.235	0.887518	0.7	0.870445	1.13416	0.2	0.301331
Q9JMK0	B4galt5	B4GT5	122.313	118.352	107.078	86.115	93.853	107.911	112.659	110.594	112.917	0.792999	0.2	0.528743	0.951898	0.7	0.771399
Q3UI43	Babam1	BABA1	456.083	404.861	367.43	430.637	381.888	366.131	331.88	309.639	334.615	0.943257	0.7	0.870445	0.819738	0.1	0.178349
Q9JL18	Bace2	BACE2	836.463	801.387	791.944	815.783	747.714	692.423	1034.03	949.849	1020.14	0.933025	0.4	0.691041	1.27297	0.1	0.178349
P97302	Bach1	BACH1	508.658	394.998	432.819	534.076	358.405	398.372	413.839	241.82	246.244	0.920412	1	1	0.568931	0.2	0.301331
Q61337	Bad	BAD	544.408	465.536	531.166	573.032	628.14	560.362	529.267	499.851	602.066	1.07882	0.1	0.408745	0.996425	1	1
Q60739	Bag1	BAG1	4873.72	4245.54	4358.8	4130.54	4362.37	4085.67	3547.14	3139.16	3427.74	0.947632	0.4	0.691041	0.786395	0.1	0.178349
Q91YN9	Bag2	BAG2	3600.13	2988.67	3382.14	3009.19	2849.36	2611.76	2439.09	2674.96	2380.23	0.842473	0.2	0.528743	0.721168	0.1	0.178349
Q9JLV1	Bag3	BAG3	7227.92	5182.62	5680.65	4944.98	6010.15	5077.45	2868.55	3045.4	3347.71	0.893815	0.4	0.691041	0.536101	0.1	0.178349
Q8CI61	Bag4	BAG4	2392.4	2105.3	1889.37	2365.75	2733.1	2028.34	2066	2039.56	2079.5	1.12371	0.7	0.870445	0.981333	0.7	0.771399
Q8CI32	Bag5	BAG5	1509.31	1881.93	1722.59	1608.63	1692.65	1723.46	1753.68	1582.73	1719.66	0.982619	1	1	0.998299	1	1
Q9Z1R2	Bag6	BAG6	4062.87	3734.65	3807.78	4682.44	3761.01	4020.34	4177.41	3587.17	3964.36	1.05582	0.7	0.870445	1.04112	1	1
Q497V6	Bahd1	BAHD1	168.809	170.75	137.698	151.376	177.097	153.742	181.146	155.534	135.275	0.910745	1	1	0.921361	1	1
Q8BKX1	Baiap2	BAIP2	950.248	1025.27	891.802	1124.16	1324.64	1154.97	1265.55	999.224	1313.82	1.21544	0.1	0.408745	1.33181	0.2	0.301331
Q9DBJ3	Baiap2l1	BI2L1	7356.91	7458.28	8201.52	8447.02	9293.34	9226.34	10158.4	11946.9	11500.8	1.23706	0.1	0.408745	1.54202	0.1	0.178349
Q80Y61	Baiap2l2	BI2L2	983.254	848.387	845.897	913.561	915.683	773.597	841.827	785.087	811.76	1.07682	1	1	0.956827	0.1	0.178349
E9QM21	Bak1	E9QM21	1281.66	1412.31	1521.24	1222.33	1371.05	1502.64	1477.56	987.246	1491.96	0.970785	0.7	0.870445	1.0462	1	1
O54962	Banf1	BAF	382.293	316.148	247.675	357.593	320.433	266.647	277.107	263.589	268.157	1.01355	1	1	0.848201	0.7	0.771399
Q99PU7	Bap1	BAP1	446.258	473.376	443.647	492.103	506.8	474.164	459.873	412.942	440.024	1.10273	0.1	0.408745	0.986031	0.4	0.503145
Q9DCT6	Bap18	BAP18	971.032	926.198	886.02	1069.24	1105.58	972.147	856.279	677.039	872.783	1.15444	0.1	0.408745	0.92451	0.1	0.178349
Q91XV3	Basp1	BASP1	1728.97	1279.91	1272.77	1447.62	1419.22	1104.99	1039.27	877.391	954.633	1.10884	1	1	0.745859	0.1	0.178349
Q07813	Bax	BAX	1065.87	1230.78	1341.39	1024.72	1193.95	1180.37	1117.07	761.265	1264.18	0.959042	0.4	0.691041	0.907611	0.7	0.771399
O88379	Baz1a	BAZ1A	1231.2	1317.06	1217.8	1385.74	1445.16	1262.91	1737.06	1708.12	1673.22	1.12552	0.2	0.528743	1.38736	0.1	0.178349
Q9Z277	Baz1b	BAZ1B	3164.85	3680.44	3620.66	4025.96	3874.13	3575.95	4933.57	4413.28	4188.3	1.07001	0.4	0.691041	1.21892	0.1	0.178349
Q91YE5	Baz2a	BAZ2A	970.675	1052.09	966.441	1189.96	1097.4	1013.99	1119.18	1237.87	1084.45	1.13055	0.2	0.528743	1.15299	0.1	0.178349
A2AUY4	Baz2b	A2AUY4	723.336	743.185	720.956	1053.97	906.549	824.986	1083.18	1214.68	1052.41	1.25329	0.1	0.408745	1.49748	0.1	0.178349
Q8VBW5	Bbx	BBX	81.9992	70.5086	60.9231	114.155	111.54	91.4127	44.0494	29.8554	36.9902	1.58194	0.1	0.408745	0.52462	0.1	0.178349
E9Q286	BC018507	E9Q286	66.7786	71.2906	72.9768	93.7675	68.5685	69.6038	62.361	61.605	77.0584	0.976339	1	1	0.874744	0.7	0.771399
D3Z7G4	BC024978	D3Z7G4	98.1524	95.9858	81.1832	108.012	98.8575	76.3139	90.8351	77.7604	88.8659	1.02992	0.7	0.870445	0.925823	0.4	0.503145
Q9R069	Bcam	BCAM	8523	6427.73	6696.41	5743.67	5050.41	4995.23	4540.05	4865.58	5134.1	0.754197	0.1	0.408745	0.726595	0.1	0.178349
Q61334	Bcap29	BAP29	37.2224	75.7771	47.4414	46.8182	32.3855	50.8497	66.9461	43.0672	82.4548	0.986864	0.7	0.870445	1.41113	0.7	0.771399
Q61335	Bcap31	BAP31	2770.79	3500.57	3648.12	2681.32	3083.66	3595.15	3325.64	2390.58	3575.28	0.880902	0.7	0.870445	0.950028	0.7	0.771399
Q61140	Bcar1	BCAR1	2081.09	1855.61	1636.04	2370.17	2445.8	2428.23	2031.1	1953.37	1959.18	1.30859	0.1	0.408745	1.05581	0.7	0.771399
Q9QZK2	Bcar3	BCAR3	699.022	777.838	729.677	821.406	743.537	829.155	1160.87	816.721	818.716	1.12571	0.2	0.528743	1.12203	0.1	0.178349
Q80YN3	Bcas1	BCAS1	5820.28	4633.45	4497.95	5089.79	5360.07	5132.22	4502.57	4769.78	5107.29	1.10764	0.7	0.870445	1.02942	1	1
Q9D287	Bcas2	SPF27	4669.62	3835.67	3773.64	4248.22	4412.47	3913.84	3441.1	3405.13	3497.79	1.10756	0.7	0.870445	0.897131	0.1	0.178349
Q8CCN5	Bcas3	BCAS3	760.705	877.255	790.777	733.262	754.815	825.983	694.41	589.511	704.608	0.954523	0.4	0.691041	0.878136	0.1	0.178349
P24288	Bcat1	BCAT1	64.4104	67.1903	61.5575	68.0085	67.1261	65.3144	50.5211	55.983	55.2872	1.04216	0.4	0.691041	0.858358	0.1	0.178349
O35855	Bcat2	BCAT2	4436.08	5096	4452.58	4064.27	3949.88	3938.68	3736.33	3113.39	4127.66	0.887099	0.1	0.408745	0.839138	0.1	0.178349
Q9CWI3	Bccip	BCCIP	1027.17	1325.28	1195.83	1249.98	1538.13	1421.22	1830.92	1548.69	1415.41	1.18848	0.2	0.528743	1.29507	0.1	0.178349
Q03311	Bche	CHLE	636.626	669.122	605.902	680.737	642.08	646.02	585.411	402.728	569.109	1.01476	0.4	0.691041	0.893946	0.1	0.178349
Q3U3J1	Bckdha	Q3U3J1	2909.05	2871.16	1822.95	2762.78	2802	1702.27	1765.83	1995.07	2139.85	0.962252	0.4	0.691041	0.694865	0.4	0.503145
Q6P3A8	Bckdhb	ODBB	260.732	328.496	174.348	297.073	230.16	152.592	226.206	147.688	186.012	0.882746	0.7	0.870445	0.713422	0.4	0.503145
O55028	Bckdk	BCKD	54.0303	73.7072	55.6926	57.6263	55.7321	54.8922	42.8823	41.4845	49.5724	1.00071	1	1	0.769982	0.1	0.178349
Q9Z0H7	Bcl10	BCL10	436.301	375.42	402.012	421.526	423.743	369.388	374.905	346.087	385.158	1.04854	1	1	0.932572	0.2	0.301331
Q99PV8	Bcl11b	BC11B	54.2535	48.8946	51.8551	60.5041	54.3751	54.7216	40.4859	33.6461	34.733	1.05528	0.1	0.408745	0.669809	0.1	0.178349
Q64373	Bcl2l1	B2CL1	721.304	742.809	701.595	752.805	885.677	755.692	854.05	756.749	838.994	1.04767	0.1	0.408745	1.16316	0.1	0.178349
P59017	Bcl2l13	B2L13	524.646	548.618	464.952	534.644	520.233	486.973	502.47	401.264	476.589	0.991589	1	1	0.908401	0.4	0.503145
Q9CPT0	Bcl2l14	B2L14	3365.23	3326.06	3242.64	3555.57	3653.63	3613.75	3560.03	4030.33	3720.53	1.0865	0.1	0.408745	1.1186	0.1	0.178349
P70345	Bcl2l2	B2CL2	634.341	650.821	628.633	529.189	571.146	535.145	540.394	494.058	543.263	0.843624	0.1	0.408745	0.851898	0.1	0.178349
Q9CXE2	Bcl7a	BCL7A	1223.78	905.972	1007.18	914.8	1111.98	989.446	599.641	515.408	620.128	0.982392	1	1	0.595366	0.1	0.178349
Q921K9	Bcl7b	BCL7B	1673.92	1444.71	1399.21	1676.93	1662.54	1421.27	1184.58	900.29	1120.08	1.15078	0.7	0.870445	0.775297	0.1	0.178349
O08664	Bcl7c	BCL7C	1002.34	901.608	778.846	901.956	1040.02	890.589	605.118	538.303	619.2	1.00039	0.7	0.870445	0.671154	0.1	0.178349
Q9D219	Bcl9	BCL9	187.255	163.873	143.625	187.404	182.999	170.207	172.73	139.861	168.109	1.11671	0.4	0.691041	1.02585	1	1
Q67FY2	Bcl9l	BCL9L	159.983	143.054	143.77	166.194	160.78	172.229	120.814	108.918	117.244	1.15597	0.1	0.408745	0.815497	0.1	0.178349
Q8K019	Bclaf1	BCLF1	5223.45	5145.2	5116.73	4920.64	6116.52	5940.41	4784.47	4681.91	4932.72	1.15455	0.7	0.870445	0.92989	0.1	0.178349
Q99NF1	Bco2	BCDO2	759.356	611.163	491.251	1453.13	833.96	799.898	1079.55	996.851	1002.84	1.36455	0.1	0.408745	1.64087	0.1	0.178349
Q6PAJ1	Bcr	BCR	2052.74	2138.75	2336.51	2133.81	2370.53	2270.56	2361.31	2764.92	2473.07	1.06163	0.7	0.870445	1.15632	0.1	0.178349
Q9CZP5	Bcs1l	BCS1	982.42	1024.2	1065.77	1199.11	928.997	950.925	1242.72	1337.42	1123.18	0.928456	0.7	0.870445	1.21336	0.1	0.178349
Q80XN0	Bdh1	BDH	5119.01	6169.79	5621.41	5663.37	5914.86	6999.26	6779.86	6965.3	6465.05	1.0522	0.4	0.691041	1.20608	0.1	0.178349
O88597	Becn1	BECN1	743.236	720.099	744.501	665.755	688.543	713.758	569.179	460.422	630.566	0.926412	0.1	0.408745	0.765812	0.1	0.178349
O35623	Bet1	BET1	114.564	144.109	143.864	117.922	144.858	154.526	148.264	98.1841	148.975	1.00691	0.4	0.691041	1.03058	0.7	0.771399
Q8R079	Bfar	BFAR	112.258	141.506	124.757	119.372	139.894	142.685	170.158	162.627	150.769	1.12133	0.7	0.870445	1.30355	0.1	0.178349
P28653	Bgn	PGS1	8383.17	8110.49	8154.26	9029.37	8881.87	7454.37	7914.08	8747.67	7795.57	1.08923	0.7	0.870445	0.970545	0.7	0.771399
O35185	Bhlhe40	BHE40	1230	1229.87	1093.15	1314.09	1508.59	958.963	1546.17	1351.49	1701.95	1.06848	0.7	0.870445	1.25718	0.1	0.178349
O35490	Bhmt	BHMT1	1215.28	975.889	1751.56	1040.92	1046.82	310.081	332.323	347.369	350.944	0.856527	0.4	0.691041	0.285835	0.1	0.178349
Q8BR07	Bicd1	BICD1	247.353	266.912	270.077	307.375	271.378	257.89	326.957	327.058	296.66	1.01673	0.4	0.691041	1.22496	0.1	0.178349
Q921C5	Bicd2	BICD2	1567.46	1778.22	1789.63	1498.47	1447.08	1622.42	1651.1	1534.85	1625.99	0.84268	0.2	0.528743	0.914392	0.4	0.503145
P70444	Bid	BID	1305.76	1216.74	1019.46	1306.22	1112.24	1031.95	1011.9	995.618	1012.1	0.914115	1	1	0.831649	0.1	0.178349
O08539	Bin1	BIN1	3411.55	2711.86	2822.95	2872.86	2712.59	2403.61	1968.25	1918.95	1921.94	0.960906	0.7	0.870445	0.680827	0.1	0.178349
S4R270	Bin2	S4R270	1646.5	1606.67	1508.22	1255	1229.66	1883.14	1077.6	1708.68	1551.09	0.781119	0.7	0.870445	0.965407	1	1
Q9JI08	Bin3	BIN3	1416.12	1182.55	1198.88	1174.41	1192.04	1377.34	1112.84	1065.63	1209.25	0.994295	0.7	0.870445	0.928233	0.4	0.503145
Q62210	Birc2	BIRC2	364.553	330.477	287.491	324.783	294.672	279.229	252.538	239.023	243.221	0.891657	0.4	0.691041	0.73597	0.1	0.178349
O88738	Birc6	BIRC6	4634.45	5234.32	5172.99	5225.11	4664.92	5467.82	5811.34	5290.17	5375.19	1.01008	0.7	0.870445	1.03909	0.1	0.178349
Q8VD62	Bles03	CK068	1284.74	1241	993.567	1275.17	1231.1	1077.08	1155.41	1226.8	1076.22	0.992023	1	1	0.931031	0.7	0.771399
Q8R016	Blmh	BLMH	3075.43	3551.88	3705.49	2835.51	3544.09	4284.35	4040.43	2865.06	3869.87	0.997807	1	1	1.08953	0.7	0.771399
Q9QUN3	Blnk	BLNK	681.644	543.796	501.94	663.276	651.23	569.118	438.553	440.799	487.364	1.19756	0.7	0.870445	0.810596	0.1	0.178349
O55102	Bloc1s1	BL1S1	545.932	504.943	494.324	522.422	558.512	517.948	472.088	452.12	465.64	1.03462	0.4	0.691041	0.922163	0.1	0.178349
Q9CWG9	Bloc1s2	BL1S2	160.152	157.676	171.088	119.428	73.1244	161.974	111.845	173.623	166.864	0.745717	0.4	0.691041	1.04191	1	1
Q5U5M8	Bloc1s3	BL1S3	686.471	566.623	544.771	687.955	629.578	586.554	601.516	527.601	527.903	1.11111	0.4	0.691041	0.931665	0.4	0.503145
Q8VED2	Bloc1s4	BL1S4	177.807	173.148	153.838	169.61	166.681	147.035	148.164	133.948	157.369	0.96265	0.4	0.691041	0.855707	0.2	0.301331
Q8R015	Bloc1s5	BL1S5	787.523	663.07	665.43	816.097	709.258	622.804	636.176	547.879	565.44	1.06586	1	1	0.849736	0.1	0.178349
Q9CY64	Blvra	BIEA	4180.37	5011.13	5248.22	4200.31	4192.18	4737.74	4954.72	5446.72	5113.63	0.838196	0.7	0.870445	1.02045	0.7	0.771399
Q923D2	Blvrb	BLVRB	3674.76	2946.86	2951.33	3143.03	2805.04	2773.45	2142.63	2006.63	2205.59	0.950433	0.4	0.691041	0.725988	0.1	0.178349
Q8R2X8	Blzf1	GO45	638.429	699.389	642.069	768.969	753.697	718.739	830.279	972.08	851.338	1.17386	0.1	0.408745	1.32593	0.1	0.178349
Q91ZE9	Bmf	BMF	26.7044	28.7993	25.4466	24.4772	23.1619	24.9856	21.2771	22.8024	25.5613	0.916598	0.1	0.408745	0.853882	0.2	0.301331
Q91Z96	Bmp2k	BMP2K	1073.33	961.996	917.63	1131.83	1161.4	1083.91	704.506	644.289	747.316	1.17654	0.1	0.408745	0.732338	0.1	0.178349
Q8BHE5	Bmp3	BMP3	41.1469	43.7123	32.9849	38.8005	43.8448	45.224	30.6352	18.9157	33.5125	1.06557	0.4	0.691041	0.744532	0.2	0.301331
P36895	Bmpr1a	BMR1A	318.049	397.366	402.094	322.685	381.854	415.6	343.387	245.489	351.138	0.960963	1	1	0.864158	0.4	0.503145
O35607	Bmpr2	BMPR2	177.95	186.995	171.587	183.523	215.059	205.163	196.409	190.37	201.5	1.15292	0.2	0.528743	1.10373	0.1	0.178349
Q6PGF5	Bms1	Q6PGF5	752.459	834.943	880.54	1046.99	947.188	858.968	1071.13	1228.67	1079.8	1.13443	0.2	0.528743	1.29326	0.1	0.178349
Q6QD59	Bnip1	SEC20	657.004	832.448	846.811	725.763	760.765	803.622	901.672	754.082	861.839	0.913889	0.7	0.870445	1.03531	0.4	0.503145
Q5SQY2	Bod1	BOD1	903.56	771.152	776.052	1003.9	1150.98	858.082	739.191	836.331	717.403	1.2936	0.2	0.528743	0.952502	0.4	0.503145
E9Q6J5	Bod1l	E9Q6J5	4572.39	3869.87	3736.32	4775.08	4479.47	4016.79	3029.4	2702.25	2988.92	1.15752	0.4	0.691041	0.772357	0.1	0.178349
O35425	Bok	BOK	80.8601	90.5104	94.3782	93.0242	89.5838	69.274	104.544	125.133	120.491	0.989763	0.7	0.870445	1.33124	0.1	0.178349
Q9D8S9	Bola1	BOLA1	713.13	596.034	693.538	645.123	761.866	736.889	679.269	540.407	606.876	1.06251	0.4	0.691041	0.875044	0.4	0.503145
Q8BGS2	Bola2	BOLA2	1281.39	1068.34	1064.85	1076.51	722.603	1151.02	896.836	1022.91	998.518	1.00765	1	1	0.934644	0.1	0.178349
Q8CEI1	Bola3	BOLA3	987.81	881.819	843.048	1044.44	935.644	891.703	869.047	680.282	807.275	1.06104	0.4	0.691041	0.915466	0.2	0.301331
P97452	Bop1	BOP1	1390.56	1471.57	1305.27	1890.88	1726.43	1735.66	1759.12	2102.88	1742.37	1.24817	0.1	0.408745	1.26504	0.1	0.178349
Q8BS90	Bora	BORA	98.8737	96.0364	75.6971	104.131	118.385	98.5329	65.3007	67.9146	65.8504	1.08429	0.2	0.528743	0.685682	0.1	0.178349
P15327	Bpgm	PMGE	1213.6	1326.55	1246.18	1184.13	1288.45	1308.97	1343.51	1261.56	1449.65	1.03392	1	1	1.0781	0.2	0.301331
Q8R164	Bphl	BPHL	6125.22	6563.58	6020.09	6169.61	6034.82	5479.08	6125.36	5201.71	5676.77	0.985241	0.7	0.870445	0.926786	0.4	0.503145
Q9Z0S1	Bpnt1	BPNT1	7362.1	7341.32	7557.44	8111.12	8262.62	7600.97	9332.2	8664.37	8396.83	1.10174	0.1	0.408745	1.17689	0.1	0.178349
A2A654	Bptf	A2A654	2164.93	2150.04	2038.64	2539.07	2227.22	2128.62	2162.8	2010.88	2107.29	1.0359	0.4	0.691041	0.980117	0.7	0.771399
P28028	Braf	BRAF	434.175	419.138	409.129	434.223	381.862	313.429	393.095	360.753	377.561	0.911065	0.7	0.870445	0.900804	0.1	0.178349
Q99MP8	Brap	BRAP	878.669	991.802	1038.47	966.338	955.473	1021.8	1087.43	952.381	1042.41	0.974326	1	1	1.05103	0.4	0.503145
P46737	Brcc3	BRCC3	1119.17	1539.04	1400.45	1217.76	1201.17	1392.51	1833.14	1613.36	1459.39	0.869549	0.7	0.870445	1.15203	0.2	0.301331
E9PZ26	Brd1	E9PZ26	506.559	572.19	516.029	619.691	716.703	707.453	687.25	814.188	728.52	1.37096	0.1	0.408745	1.41178	0.1	0.178349
Q7JJ13	Brd2	BRD2	1289.06	1453.09	1420.36	1302.17	1520.93	1487.06	1371.42	1089.26	1293.51	1.04696	0.4	0.691041	0.910692	0.4	0.503145
Q8K2F0	Brd3	BRD3	2322.81	2478.3	2389.33	2213.14	2464.79	2678.82	2431.74	2404.88	2411.42	1.03158	1	1	1.00924	0.7	0.771399
Q9ESU6	Brd4	BRD4	4654.91	4542.29	4335.57	4405.49	5157.48	4804.97	3361.55	2715.24	3311.23	1.05783	0.4	0.691041	0.728978	0.1	0.178349
O88665	Brd7	BRD7	1415.53	1192.4	1268.44	1468.55	1428.75	1283.08	1084.23	800.284	967.322	1.12638	0.2	0.528743	0.762608	0.1	0.178349
Q8R3B7	Brd8	BRD8	1578.5	1488.12	1485.25	1610.44	1480.74	1476.68	1361.26	1140.42	1232.14	0.995041	0.7	0.870445	0.827984	0.1	0.178349
Q3UQU0	Brd9	BRD9	662.23	613.788	582.792	657.182	728.909	703.073	595.029	620.544	557.653	1.14547	0.2	0.528743	0.969437	0.7	0.771399
Q91Y44	Brdt	BRDT	48.9246	52.8005	53.9759	47.3995	59.3743	56.4143	53.4602	42.3673	44.5373	1.06844	0.7	0.870445	0.843501	0.4	0.503145
Q8K3W0	Bre	BRE	2666.33	2892.63	2759.98	2948.28	2841.3	3261.28	3371.46	3896.15	3158.18	1.06822	0.2	0.528743	1.22155	0.1	0.178349
Q8BXV2	Bri3bp	BRI3B	173.537	208.659	196.062	157.985	169.587	220.612	202.918	162.744	213.061	0.864966	0.7	0.870445	1.03497	1	1
Q9DCA5	Brix1	BRX1	594.457	695.91	747.162	671.752	741.796	712.848	839.259	960.158	783.205	1.02434	1	1	1.20599	0.1	0.178349
Q91VR8	Brk1	BRK1	1792.99	1757.38	1654.4	1867.57	2446.42	1833.51	1973.11	1672.26	1789.34	1.0627	0.1	0.408745	1.01819	0.7	0.771399
Q99N20	Brms1	BRMS1	364.49	399.05	369.93	492.006	498.325	400.697	649.776	502.153	495.223	1.33	0.1	0.408745	1.35743	0.1	0.178349
Q3U1T3	Brms1l	BRM1L	66.9687	57.3811	52.7705	62.9684	67.5596	69.569	68.6195	49.4218	53.101	1.17738	0.2	0.528743	0.925409	1	1
Q8K2Q7	Brox	BROX	1196.14	1422.97	1559.15	1244.11	1555.3	1485.72	1554.9	1628.88	1532.61	1.0441	1	1	1.09272	0.4	0.503145
B2RRD7	Brpf1	B2RRD7	338.925	366.521	347.529	448.591	361.202	342.55	411.973	366.327	340.551	1.03934	0.7	0.870445	1.05409	0.7	0.771399
B2KF05	Brpf3	B2KF05	96.7705	118.668	84.0105	115.041	89.6881	81.2668	115.223	93.4726	94.4201	0.926812	0.7	0.870445	0.975712	1	1
A2AHJ4	Brwd3	BRWD3	52.4927	70.8909	63.0935	72.4932	77.6119	101.734	105.932	103.841	91.2406	1.23011	0.1	0.408745	1.64583	0.1	0.178349
Q80Y55	Bsdc1	BSDC1	1710.97	1551.45	1585.19	1527.55	1484.83	1335.03	1246.71	1006	1098.84	0.936689	0.1	0.408745	0.693191	0.1	0.178349
P18572	Bsg	BASI	4171.81	4097.35	4148.71	4320.22	4198.07	4381.46	5322.84	5104.72	5152.93	1.04134	0.1	0.408745	1.24206	0.1	0.178349
Q80YW5	Bspry	BSPRY	1398.84	1830.74	1521.78	1786.77	1908.87	1705.16	3141.39	2865.24	2786.41	1.17413	0.4	0.691041	1.88282	0.1	0.178349
E9QAE3	Btaf1	E9QAE3	2515.34	2958.29	2811.7	2776.1	2745.13	2856.84	3609.27	4322.25	3489.18	0.987339	1	1	1.28366	0.1	0.178349
P58544	Btbd1	BTBD1	69.7173	75.6859	73.2558	86.5409	78.9726	68.4157	85.5311	112.63	84.1662	1.07804	0.7	0.870445	1.16757	0.1	0.178349
Q05928	Btc	BTC	429.329	293.262	233.178	255.124	232.323	354.183	119.863	72.139	83.1838	0.869952	0.7	0.870445	0.28365	0.1	0.178349
Q8CIF4	Btd	BTD	1123.32	988.351	955.944	1009.13	862.007	844.127	852.133	715.004	893.891	0.872167	0.4	0.691041	0.862176	0.1	0.178349
Q64152	Btf3	BTF3	3199.45	2949.39	2729.62	3736.96	3485.95	3133.12	3129.81	3019.53	3218.76	1.18192	0.2	0.528743	1.06117	0.4	0.503145
Q9CQH7	Btf3l4	BT3L4	3002.69	2395.2	2524.48	3057.7	3101.37	2557.2	2385.78	2549.51	2295.92	1.21122	0.2	0.528743	0.945058	0.4	0.503145
P62325	Btg1	BTG1	93.3229	100.717	91.3373	91.627	129.523	102.746	90.8597	76.59	94.3935	1.10097	0.4	0.691041	0.973606	0.4	0.503145
Q7TST0	Btnl1	BTNL1	544.532	702.588	638.389	563.799	720.12	786.164	797.12	564.43	716.444	1.12803	0.4	0.691041	1.12227	0.4	0.503145
A2CG22	Btnl6	A2CG22	34.4684	35.7273	38.3619	28.4991	39.0117	42.9134	34.1133	20.9029	30.405	1.09193	0.7	0.870445	0.85103	0.1	0.178349
Q9Z1S0	Bub1b	BUB1B	430.92	426.184	403.895	448.945	419.444	537.039	373.08	337.958	393.952	1.05341	0.4	0.691041	0.875397	0.1	0.178349
Q9WVA3	Bub3	BUB3	3699.73	3290.85	3250.3	4051.35	3714.27	3536.4	3113.5	3494.86	3332.28	1.12867	0.2	0.528743	1.01259	1	1
Q8R149	Bud13	BUD13	356.334	356.874	327.68	412.433	399.238	343.152	279.669	250.08	257.742	1.1204	0.4	0.691041	0.723316	0.1	0.178349
E0CX20	Bud31	E0CX20	126.328	109.948	114.823	136.477	122.179	122.209	191.362	178.799	116.489	1.06432	0.4	0.691041	1.55717	0.2	0.301331
O54825	Bysl	BYST	1321.1	1621.71	1547.64	1362.85	1490.01	1460.65	1736.98	1512.28	1703.99	0.943792	0.7	0.870445	1.10102	0.4	0.503145
Q9CQC6	Bzw1	BZW1	3155.23	3745.95	3866.23	3113.51	4209.55	4191.24	3845.64	2617.92	3902.78	1.11887	0.7	0.870445	1.02661	1	1
Q91VK1	Bzw2	BZW2	2511.26	3142.96	3463.97	2564.37	3586.58	3340.2	3767.68	2403.28	3367.09	1.06276	0.7	0.870445	1.07131	1	1
Q9JJ06	C1galt1	C1GLT	2285.49	2549.02	3155.05	2510.32	2530.76	2449.29	3343.23	3715.74	3328.55	0.984818	0.7	0.870445	1.31157	0.1	0.178349
Q9JMG2	C1galt1c1	C1GLC	2260.3	2901.53	3417.66	2392.8	2811.71	2991.89	3423.49	2604.72	2971.58	0.969044	1	1	1.02414	0.7	0.771399
P98086	C1qa	C1QA	1933.83	2124.16	1850.39	1642.12	1573.6	1370.24	1057.46	783.834	1231.75	0.813722	0.1	0.408745	0.546822	0.1	0.178349
P14106	C1qb	C1QB	479.107	480.477	421.808	414.32	403.515	333.698	275.155	215.95	307.77	0.842223	0.1	0.408745	0.574308	0.1	0.178349
Q8R5L1	C1qbp	Q8R5L1	2884.95	2570.4	2544.04	3105.82	3039.75	2562.27	2838.37	2412.82	2736.59	1.1826	0.4	0.691041	1.06465	1	1
Q02105	C1qc	C1QC	152.857	156.021	176.021	166.523	137.719	158.486	114.829	59.6551	138.968	1.0158	1	1	0.735984	0.1	0.178349
Q8CG16	C1ra	C1RA	798.988	813.313	645.11	601.015	608.458	571.752	478.336	370.317	496.177	0.75222	0.1	0.408745	0.598677	0.1	0.178349
Q8CG14	C1sa	CS1A	1165.3	1241.23	1018.65	991.367	790.294	818.728	732.505	593.572	748.526	0.70259	0.1	0.408745	0.628598	0.1	0.178349
Q80X80	C2cd2l	C2C2L	839.352	756.139	705.573	837.445	769.012	713.468	558.333	628.385	614.311	1.01703	1	1	0.812431	0.1	0.178349
Q5HZI2	C2cd4cC2CD4	C2C4C	61.032	79.8404	73.341	67.1314	92.1459	102.726	157.784	152.044	162.64	1.2564	0.4	0.691041	2.15137	0.1	0.178349
Q7TPS5	C2cd5	C2CD5	438.172	477.822	511.701	499.43	525.55	516.888	702.897	474.354	586.816	1.08176	0.2	0.528743	1.22811	0.4	0.503145
P01027	C3	CO3	10244.1	11325.6	11806.3	7304.28	8767.56	9240.67	9636.06	7539.72	8509.67	0.774136	0.1	0.408745	0.751366	0.1	0.178349
P01029	C4b	CO4B	2433.79	2817.31	2209.04	1850.24	1954.84	2013.19	2113.02	1597.06	1902.41	0.803208	0.1	0.408745	0.781666	0.1	0.178349
P06684	C5	CO5	67.88	68.2162	52.4861	36.6477	46.0248	47.277	45.8439	37.5416	38.813	0.678032	0.1	0.408745	0.571788	0.1	0.178349
E9Q6D8	C6	E9Q6D8	50.2254	61.9143	27.5037	15.4987	28.2421	21.2988	17.0566	22.7052	36.6644	0.424064	0.2	0.528743	0.452066	0.2	0.301331
D3YXF5	C7	D3YXF5	79.5825	95.1859	50.6611	25.5504	64.8509	69.8682	23.0645	47.5807	62.0749	0.814889	0.4	0.691041	0.597879	0.2	0.301331
Q8K182	C8a	CO8A	1187.8	1073.13	615.934	335.509	728.65	546.171	403.831	578.664	597.29	0.508951	0.2	0.528743	0.53923	0.1	0.178349
Q8BH35	C8b	CO8B	422.283	441.446	314.046	228.251	333.883	302.502	246.862	290.302	297.574	0.716349	0.2	0.528743	0.687458	0.1	0.178349
P06683	C9	CO9	3802.45	3656.16	2154.56	623.003	1660.11	1252.11	909.946	1240.91	1341.08	0.342466	0.1	0.408745	0.339403	0.1	0.178349
P13634	Ca1	CAH1	16184.2	18941.9	15955.6	34741.7	38359.9	31796.1	47186.5	30484.2	42330.3	2.14664	0.1	0.408745	2.61553	0.1	0.178349
Q8CI85	Ca12	CAH12	253.305	288.304	282.501	387.74	458.018	459.496	571.385	386.246	531.673	1.6213	0.1	0.408745	1.88202	0.1	0.178349
Q9D6N1	Ca13	CAH13	1522.67	1372.21	1431.2	1459.16	1367.63	1441.37	1068.71	1004.77	1209.58	1.00711	1	1	0.746723	0.1	0.178349
P00920	Ca2	CAH2	10641.4	9213.63	8273.81	12091.9	11220.9	11777.8	8836.23	9537	9749.19	1.2783	0.1	0.408745	1.0351	1	1
P16015	Ca3	CAH3	7963.05	6802.12	8241.61	6621.29	5538.48	2716.18	3731.66	2277.54	4208.08	0.695522	0.1	0.408745	0.468622	0.1	0.178349
Q64444	Ca4	CAH4	1593.4	1117.42	1100.5	1797.25	1400.34	1495.13	1196.45	1308.47	1318.57	1.33802	0.4	0.691041	1.17097	0.7	0.771399
P28651	Ca8	CAH8	1428.15	1447.73	1246.8	1331.9	1187.43	1467.44	1030.85	529.44	886.401	0.932605	1	1	0.620664	0.1	0.178349
Q8VHB5	Ca9	CAH9	522.619	524.482	483.369	647.052	692.374	600.664	958.533	1143.17	956.242	1.23809	0.1	0.408745	1.8341	0.1	0.178349
Q8VDY9	Caap1	CAAP1	1139.98	773.71	806.955	959.844	1111.02	906.122	628.587	512.973	639.401	1.18946	0.7	0.870445	0.778962	0.1	0.178349
Q06138	Cab39	CAB39	2730.11	3151.34	3517.88	2843.3	3503.4	3505.79	4397.09	3385.3	4287.37	1.11172	1	1	1.36049	0.2	0.301331
Q9DB16	Cab39l	CB39L	368.563	407.142	413.37	319.358	337.44	357.189	330.493	217.339	319.326	0.828802	0.1	0.408745	0.784311	0.1	0.178349
G3X8Q1	Cabin1	G3X8Q1	402.141	567.416	363.1	460.099	467.544	425.642	496.216	396.535	593.979	1.14412	0.7	0.870445	1.23394	0.7	0.771399
Q9ESJ1	Cables1	CABL1	19.8467	21.2488	25.0177	26.7546	23.7069	22.1756	33.5955	23.2018	18.8038	1.11568	0.4	0.691041	1.09191	1	1
Q8BG21	Cacfd1	FLOWR	190.17	189.269	238.127	153.771	197.24	192.079	171.584	93.0146	175.491	1.01004	1	1	0.902266	0.1	0.178349
Q6PDJ1	Cachd1	CAHD1	572.152	712.266	678.429	561.529	588.938	653.474	662.932	604.115	635.014	0.868091	0.4	0.691041	0.936007	0.7	0.771399
O88427	Cacna1h	CAC1H	203.657	163.434	177.963	97.2471	51.4973	180.925	47.6221	68.0093	70.9243	0.546446	0.4	0.691041	0.382154	0.1	0.178349
O08532-4	Cacna2d1	CA2D1	3858.4	3375.88	2936.93	3190.75	2225.78	2750.46	2084.23	1945.13	2165.25	0.814739	0.2	0.528743	0.617389	0.1	0.178349
O08532	Cacna2d1	CA2D1	24.5712	34.9211	21.6756	33.5301	20.2444	25.6903	30.0829	19.916	31.7441	1.04554	1	1	1.22432	1	1
Q8R3Z5	Cacnb1	CACB1	162.964	164.781	164.881	124.498	145.11	160.146	122.621	116.015	103.041	0.880623	0.1	0.408745	0.704056	0.1	0.178349
Q8CC27	Cacnb2	CACB2	203.029	194.413	194.308	160.483	159.71	156.502	132.843	92.238	126.212	0.821499	0.1	0.408745	0.649195	0.1	0.178349
Q9CS00	Cactin	CATIN	877.664	1054.67	1126.55	988.752	1167.13	1164.03	1254.25	1336.01	1220.2	1.10369	0.4	0.691041	1.18924	0.1	0.178349
Q8R0X2	Cacul1	CACL1	430.597	467.031	386.707	413.846	469.635	439.266	422.906	354.607	447.523	1.02013	0.7	0.870445	0.982139	0.7	0.771399
Q9CXW3	Cacybp	CYBP	3581.55	4129.33	4061.5	3741.24	3559.79	3591.73	3857.54	3591.11	3947.69	0.884336	0.4	0.691041	0.949782	0.7	0.771399
B2RQC6	Cad	PYR1	8977.01	10630.5	10445.3	11207.7	9464.73	10567.9	10638.6	11158.5	9933.9	1.01174	0.7	0.870445	1.01851	0.4	0.503145
Q8R5M8	Cadm1	CADM1	355.859	293.776	247.623	264.461	230.447	240.134	173.793	136.686	158.711	0.817405	0.2	0.528743	0.540245	0.1	0.178349
Q8R464	Cadm4	CADM4	202.472	163.313	154.355	125.298	112.672	133.824	91.7354	83.6458	86.7822	0.767226	0.1	0.408745	0.531386	0.1	0.178349
Q80TJ1	Cadps	CAPS1	216.851	246.661	237.074	194.955	189.9	202.716	209.722	215.277	182.422	0.822338	0.1	0.408745	0.884627	0.1	0.178349
Q8BYR5	Cadps2	CAPS2	170.961	190.665	171.519	178.325	193.053	185.07	238.315	228.881	204.622	1.07901	0.4	0.691041	1.33444	0.1	0.178349
Q08331	Calb2	CALB2	6947.16	4744.74	5173.84	4017.41	4878.01	3972.99	2221.16	2033.85	2365.35	0.776485	0.2	0.528743	0.429306	0.1	0.178349
Q8CGU1	Calcoco1	CACO1	625.252	603.707	576.538	567.864	578.162	520.33	500.255	450.116	442.995	0.940628	0.2	0.528743	0.745587	0.1	0.178349
Q8VCQ8	Cald1	Q8VCQ8	14433.6	11551.8	12748.9	9860.76	9356.5	10377.3	6570.12	7973.97	7634.38	0.77346	0.1	0.408745	0.598827	0.1	0.178349
E9QA15	Cald1	E9QA15	8181.17	5867.8	6519.76	5360.94	4562.68	5846.89	3199.09	2931.88	3490.8	0.82226	0.1	0.408745	0.490676	0.1	0.178349
P62204	Calm1	CALM	4399.49	3068.47	3302.67	2403.91	4932.87	3889.21	3822.39	3455.68	3058.01	1.1776	1	1	1.04633	1	1
Q91WQ9	Calml4	CALL4	1599.42	1222.3	1295.36	1811.84	1821.27	1728	1801.99	2092.18	1836.98	1.39871	0.1	0.408745	1.41812	0.1	0.178349
P14211	Calr	CALR	44206.3	39230.7	41035.9	42437.7	35064.9	32533.3	32006.5	31529	31141.9	0.854493	0.4	0.691041	0.768327	0.1	0.178349
O35887	Calu	CALU	10742.8	8693.57	8595.79	9779.84	9547.05	8217.37	6701.23	6454.48	6648.3	1.09817	1	1	0.764738	0.1	0.178349
Q6XLQ8	Calu	Q6XLQ8	2233.74	1913.6	2067.06	2106.5	2318.15	1459.13	1685.04	1717.72	1720.61	1.01908	1	1	0.830997	0.1	0.178349
Q91YS8	Camk1	KCC1A	1948.54	1864.71	1861.48	1786.92	1609.87	1790.13	1547.4	1408.54	1563.62	0.958283	0.1	0.408745	0.829834	0.1	0.178349
Q8BW96	Camk1d	KCC1D	3170.43	3131.3	3013.5	2937.06	2790.73	3064.06	2228.9	1997.66	2385.4	0.937968	0.2	0.528743	0.711813	0.1	0.178349
P11798	Camk2a	KCC2A	2044.63	2393.51	2554.09	1773.74	2057.84	2108.07	2326.78	1884.66	2408.36	0.859758	0.4	0.691041	0.97212	0.7	0.771399
P28652	Camk2b	KCC2B	1120.95	1311.88	1469.88	866.307	1121.75	1255.79	1023.09	922.128	1038.67	0.855071	0.4	0.691041	0.779866	0.1	0.178349
E9Q1T1	Camk2d	E9Q1T1	3334.97	3309.17	3425.91	2989.86	3451.07	3679.7	3775.41	3885.89	3813.13	1.03481	0.7	0.870445	1.14338	0.1	0.178349
Q923T9-3	Camk2g	KCC2G	1031.02	1305.15	1248.6	910.771	949.669	1135.38	1103.64	1243.08	1215.72	0.760587	0.2	0.528743	0.973667	0.7	0.771399
Q8C078	Camkk2	KKCC2	115.263	106.483	93.5695	97.5609	92.4121	101.506	78.0641	62.3082	76.5328	0.916211	0.4	0.691041	0.718733	0.1	0.178349
Q3U2J5	Camkmt	CMKMT	246.397	318.835	317.08	340.473	364.368	343.201	441.046	335.362	335.263	1.08238	0.1	0.408745	1.05766	0.1	0.178349
P49070	Camlg	CAMLG	182.022	201.54	206.1	207.359	184.513	211.871	223.37	206.772	182.587	1.02887	0.4	0.691041	1.02596	0.4	0.503145
P51437	Camp	CRAMP	184.693	122.336	133.174	190.277	104.461	116.308	37.3065	53.2145	48.8897	0.873354	0.7	0.870445	0.367111	0.1	0.178349
A2AHC3	Camsap1	CAMP1	1683.98	1484.48	1530.4	1672.22	1723.88	1621.97	1180.75	1107.33	1222.46	1.09267	0.4	0.691041	0.77153	0.1	0.178349
Q8C1B1	Camsap2	CAMP2	545.363	500.587	457.226	499.527	445.626	444.378	406.477	354.648	326.192	0.890207	0.2	0.528743	0.708464	0.1	0.178349
Q80VC9	Camsap3	CAMP3	2679.24	2459.54	2289.85	3104.31	3152.89	3085.71	2428.21	2471.18	2674.22	1.26215	0.1	0.408745	1.00473	1	1
Q6ZQ38	Cand1	CAND1	11635.7	13390.3	14242.4	9205.19	11675.6	13294.1	12640.5	11578.9	11681.7	0.871945	0.4	0.691041	0.8724	0.4	0.503145
Q6ZQ73	Cand2	CAND2	26.2397	27.0735	22.2658	13.4762	19.9137	28.7036	20.2281	19.7504	17.5124	0.758915	0.7	0.870445	0.752692	0.1	0.178349
Q8VCF1	Cant1	CANT1	5047.32	4969.79	5448.33	5358.88	6063.68	5683.34	6443.59	7175.45	6362.75	1.12601	0.2	0.528743	1.27664	0.1	0.178349
P35564	Canx	CALX	9680.96	9988.81	10187	10032.3	9388.41	9514.66	9153.64	9678.8	8970.99	0.952532	0.4	0.691041	0.916389	0.1	0.178349
P40124	Cap1	CAP1	13208.7	14582.6	13618.5	13558.4	13924.8	14353.2	14948.7	13460.7	14548.8	1.02249	1	1	1.06831	0.7	0.771399
Q9CYT6	Cap2	CAP2	3745.13	4954.75	5293.07	2735.68	3417.97	3431.34	3331.11	3308.42	3393.61	0.689837	0.1	0.408745	0.672306	0.1	0.178349
Q99LB4	Capg	Q99LB4	3915.44	3827.2	3769.53	4147.55	4463.05	3428.53	4597.49	4438.33	5211.18	1.0837	0.7	0.870445	1.20127	0.1	0.178349
O35350	Capn1	CAN1	3694.84	4747.34	4755.55	4283.6	5279.04	5052.12	6797.69	6586.91	6391.8	1.0642	0.4	0.691041	1.38749	0.1	0.178349
Q3UW68	Capn13	CAN13	1482.09	1740.44	2006.48	1672.2	1475.42	1645.33	1617.14	2183.39	1472.09	0.945353	0.4	0.691041	0.929156	1	1
O08529	Capn2	CAN2	3282.5	4078.64	4358.56	3667.29	4068.05	4040.02	5079.44	4226.79	3984.84	0.990531	0.7	0.870445	1.03632	0.7	0.771399
O08688	Capn5	CAN5	1208.18	1446.35	1395.22	1724.41	1803.74	1637.39	2716.78	3694.41	2581.73	1.23594	0.1	0.408745	1.94721	0.1	0.178349
Q9R1S8	Capn7	CAN7	938.115	1233.18	1183.39	1039.64	1205.64	1245.26	1354.82	1343.29	1353.49	1.0188	0.7	0.870445	1.14374	0.1	0.178349
Q9D805	Capn9	CAN9	317.198	295.763	293.29	334.571	321.878	348.596	387.745	411.604	492.959	1.13121	0.1	0.408745	1.39167	0.1	0.178349
D3YW48	Capns1	D3YW48	2358.88	3062.96	3538.39	2682.73	3646.15	2761.23	4996.74	3777.13	3988.38	0.901491	1	1	1.30213	0.1	0.178349
Q60865	Caprin1	CAPR1	8906.29	7553.25	8114.56	8897.48	9143.52	8422.79	7102.75	6970.51	7214.58	1.09648	0.4	0.691041	0.875309	0.1	0.178349
Q5RKN9	Capza1	Q5RKN9	5659.03	5964.59	5530.64	5450.68	5587.77	5228.27	5185.23	4117.71	4872.87	0.963183	0.2	0.528743	0.861079	0.1	0.178349
P47754	Capza2	CAZA2	4369.42	5698.28	5384.76	5075.35	5767.21	5172.76	6103.9	4708.16	5059.21	0.96063	1	1	0.939542	1	1
P47757-2	Capzb	CAPZB	5161.84	5318.77	5325.55	5268.42	5153.52	5569.31	5687.13	7236.73	5233	0.990534	1	1	1.06926	0.4	0.503145
P47757	Capzb	CAPZB	125.776	146.901	120.469	80.129	75.2252	165.545	73.9612	105.817	106.186	0.637077	0.7	0.870445	0.841313	0.1	0.178349
P58660	Card10	CAR10	475.372	470.42	441.469	560.494	564.719	544.527	622.588	637.149	573.908	1.19148	0.1	0.408745	1.32347	0.1	0.178349
Q8CIS0	Card11	CAR11	740.796	850.409	745.014	740.222	670.606	612.564	576.235	545.842	642.699	0.900125	0.1	0.408745	0.773455	0.1	0.178349
E9PWH2	Card6	E9PWH2	139.441	149.153	139.392	150.294	146.891	113.291	174.194	169.313	161.963	1.05343	1	1	1.21423	0.1	0.178349
A2AIV8	Card9	CARD9	101.905	108.27	87.5344	83.2631	82.2198	85.2918	64.9884	41.6287	68.5105	0.817066	0.1	0.408745	0.637735	0.1	0.178349
Q9CR86	Carhsp1	CHSP1	3994.75	3524.99	3581.98	3814.85	3708.28	3464.42	3210.88	3142.91	3538.48	1.03526	1	1	0.896398	0.2	0.301331
Q9CZ42	Carkd	NNRD	5235.19	4769.48	4508.88	5067.82	4700.35	4378.08	4627.87	4897.23	4603.62	0.985506	0.7	0.870445	0.970309	1	1
Q9WVG6	Carm1	CARM1	1439.53	1700.95	1872.71	1593.37	1956.55	2031.31	2182.79	2256.71	2067.64	1.15027	0.4	0.691041	1.28328	0.1	0.178349
Q9ER72	Cars	SYCC	4901.14	6057.6	6618.01	5345	6035.12	5936.1	6870.9	9016.44	7087.1	0.979943	0.7	0.870445	1.16995	0.1	0.178349
Q8BYM8	Cars2	SYCM	576.898	691.414	657.63	523.849	643.455	656.588	811.757	828.541	746.273	0.978445	0.4	0.691041	1.23437	0.1	0.178349
P56388	Cartpt	CART	699.958	518.166	497.214	390.906	459.096	410.073	373.385	308.405	455.546	0.791393	0.1	0.408745	0.72059	0.1	0.178349
Q8K3W3	Casc3	CASC3	2318.17	2076.99	2008.57	2516.01	2750.07	2243.88	1649.96	1245.46	1585.63	1.21137	0.2	0.528743	0.763427	0.1	0.178349
Q6P2L7	Casc4	CASC4	874.67	772.228	899.515	582.316	702.071	742.154	538.91	457.613	504.876	0.80267	0.1	0.408745	0.577219	0.1	0.178349
A3KGI3	Casc5	A3KGI3	154.003	137.793	169.252	188.773	170.385	213.459	246.03	249.742	279.879	1.22578	0.1	0.408745	1.62167	0.1	0.178349
Q7TN73	Casd1	CASD1	1334.33	1507.53	1471.31	1147.24	1404.6	1670.11	901.558	860.546	910.083	0.954659	1	1	0.612759	0.1	0.178349
O70589	Cask	CSKP	3878.22	4570.81	4795.67	4115.17	4921.9	4760.99	5082.82	4579.49	5234.25	1.04161	0.7	0.870445	1.11202	0.2	0.301331
Q6P9K8	Caskin1	CSKI1	16.0974	22.6609	25.0974	24.9912	25.3514	16.008	26.6676	21.5446	14.2341	1.10283	1	1	0.950739	1	1
Q8VHK1	Caskin2	CSKI2	707.211	691.781	674.024	705.966	690.766	735.206	533.849	478.658	540.183	1.0205	0.7	0.870445	0.771702	0.1	0.178349
P29452	Casp1	CASP1	5122.47	5862.57	5410.79	5408.05	5764.12	5818.9	6849.85	5733.2	6722.75	1.0653	1	1	1.24247	0.2	0.301331
O08736	Casp12	CASPC	1401.86	1393.44	1303.86	1275.24	1197.67	1229.25	925.841	877.694	956.015	0.882169	0.1	0.408745	0.664428	0.1	0.178349
O89094	Casp14	CASPE	778.299	729.847	701.433	726.365	486.798	640.921	317.372	492.501	377.761	0.878158	0.2	0.528743	0.517589	0.1	0.178349
P29594	Casp2	CASP2	1375.48	1498.25	1232.98	1431.86	1434	1318.99	1464.5	1341.89	1358.27	1.04099	1	1	0.987488	1	1
P70677	Casp3	CASP3	3770.12	4034.01	3741.64	4033.81	4133.23	3771.61	4984.21	4577	4438.74	1.06994	0.4	0.691041	1.21402	0.1	0.178349
P70343	Casp4	CASP4	772.623	894.576	808.682	944.426	762.612	852.612	833.799	576.832	734.261	1.05432	1	1	0.907972	0.4	0.503145
O08738	Casp6	CASP6	1126.85	1363.08	1591.71	1241.34	1733.73	1472.41	2309.78	1431.2	1929.47	1.08021	0.7	0.870445	1.41552	0.2	0.301331
P97864	Casp7	CASP7	3288.99	3119.18	2782.63	3378.98	3008.11	3216.86	2622.62	2283.45	2438.27	1.03132	0.7	0.870445	0.781702	0.1	0.178349
O89110	Casp8	CASP8	4086.4	3930.6	3570.13	4622.9	4806.16	4433.17	4965.75	3910.05	4000.04	1.17613	0.1	0.408745	1.01767	0.7	0.771399
Q8C3Q9	Casp9	CASP9	315.407	297.346	265.205	345.904	348.77	358.937	340.059	330.81	350.479	1.17294	0.1	0.408745	1.14365	0.1	0.178349
P51125-3	Cast	ICAL	7164.84	6661.76	6731.84	6129.92	9059.29	8203.25	4326.14	3129.22	4592.21	1.21857	0.7	0.870445	0.642639	0.1	0.178349
Q9CWL2	Casz1	CASZ1	1727.26	1890.2	1827.61	2037.16	1825.92	2087.37	1976.61	1878.23	1960.05	1.11466	0.4	0.691041	1.07247	0.2	0.301331
P24270	Cat	CATA	7787.15	6926.79	6642.19	8297.79	7794.26	8107.83	6852.96	6906.11	7136.97	1.1705	0.1	0.408745	0.997014	1	1
P49817	Cav1	CAV1	3201.04	2976.07	2570.32	2463.03	2425.91	3569.22	1084.89	877.623	1470.42	0.827612	0.7	0.870445	0.364538	0.1	0.178349
Q9WVC3	Cav2	CAV2	906.147	1031.65	727.465	551.351	1011.19	1540.15	435.838	230.374	536.145	1.11592	1	1	0.480979	0.1	0.178349
O54972	Cbfa2t3	MTG16	32.9459	35.0146	30.8619	38.217	42.9212	32.1469	34.7449	33.9995	31.0493	1.15999	0.4	0.691041	1.03198	1	1
Q08024-2	Cbfb	PEBB	1127.79	1044.99	942.514	1311.67	1134	1030.61	862.14	847.259	886.395	1.08518	0.4	0.691041	0.825022	0.1	0.178349
Q08024	Cbfb	PEBB	416.795	306.91	294.357	343.143	411.082	370.672	201.898	125.002	197.664	1.20775	0.7	0.870445	0.644045	0.1	0.178349
P22682	Cbl	CBL	3001.42	2682.06	2636.06	2914.89	2984.36	2594.25	2165.32	2198.82	2176.74	1.08681	1	1	0.811593	0.1	0.178349
Q3TTA7	Cblb	CBLB	138.292	107.048	91.0896	155.704	148.981	106.288	123.649	127.067	119.536	1.39172	0.4	0.691041	1.15508	0.7	0.771399
Q80XL1	Cblc	CBLC	79.208	81.0806	85.0202	120.199	100.698	101.796	159.273	153.029	138.495	1.25549	0.1	0.408745	1.88737	0.1	0.178349
Q9JIY2	Cbll1	HAKAI	696.471	614.422	531.209	756.999	826.549	769.725	431.551	436.018	519.524	1.25276	0.1	0.408745	0.709639	0.1	0.178349
P48758	Cbr1	CBR1	9583.99	9838.83	10081.9	9189.22	11145.2	10388.3	11110.3	10263	11155.6	1.05585	0.7	0.870445	1.12923	0.1	0.178349
P08074	Cbr2	CBR2	4141.53	4308.75	3799.3	4355.05	3131.95	3824.39	3376.65	3157.91	3527.84	0.923424	1	1	0.815315	0.1	0.178349
Q8K354	Cbr3	CBR3	5531.25	3968.65	5263.3	5001.68	5795.13	5336.05	5445.76	6829.75	5623.56	1.01382	0.7	0.870445	1.06845	0.2	0.301331
Q91VT4	Cbr4	CBR4	1477.56	1809.54	1632.37	1564.86	1587.73	1617.43	2218.36	2311.04	2267.84	0.972653	0.7	0.870445	1.38929	0.1	0.178349
Q91WT9	Cbs	CBS	2400.68	3309.2	3177.89	2317.82	1737.87	2841.98	2019.79	1910.6	1755.27	0.729358	0.2	0.528743	0.601217	0.1	0.178349
Q8VEH6	Cbwd1	CBWD1	1214.46	1227.81	1158.34	1411.22	1327.56	1240.48	1263.92	993.4	1138.63	1.09313	0.1	0.408745	0.937561	0.7	0.771399
P83917	Cbx1	CBX1	1813.89	1499.8	1510.01	1833.69	1593.02	1418.66	1415.59	1335.39	1406.88	1.05497	1	1	0.931702	0.1	0.178349
P23198	Cbx3	CBX3	4851.4	4250.49	4138.51	4863.68	4167.67	3685.38	3198.28	3011.36	3306.9	0.980515	1	1	0.75245	0.1	0.178349
Q61686	Cbx5	CBX5	3678.03	3137.26	3248.94	3570.92	3212.68	3076.6	2571.03	2309.62	2357.92	0.988839	0.7	0.870445	0.725751	0.1	0.178349
Q9QXV1	Cbx8	CBX8	347.012	355.68	319.594	425.471	412.664	339.006	364.14	318.989	325.878	1.18919	0.4	0.691041	0.939097	1	1
Q8K1A6	Cc2d1a	C2D1A	2301.6	2201.86	2193.11	2569.74	2704.14	2407.68	2403.86	2532.3	2566.05	1.16708	0.1	0.408745	1.15007	0.1	0.178349
Q8BRN9	Cc2d1b	C2D1B	4042.95	4172.28	3859.27	4798.2	4669.78	4369.89	4299.11	4227.61	4469.7	1.15504	0.1	0.408745	1.06336	0.1	0.178349
Q8CH18	Ccar1	CCAR1	7530.06	7458.54	7249.74	8426.01	8067.22	7732.17	7573.4	7419.42	7656.93	1.08161	0.1	0.408745	1.0154	0.4	0.503145
Q8VDP4	Ccar2	CCAR2	6805.33	7084.06	7109.1	7009.24	7303.9	8146	7771.28	8736.74	8267.55	1.03103	0.4	0.691041	1.16706	0.1	0.178349
Q8BTY1	Ccbl1	KAT1	1859.7	2068.47	1799.88	2151.51	2177.8	2392.47	1979.4	2303.96	2230.35	1.17105	0.1	0.408745	1.19931	0.2	0.301331
Q71RI9	Ccbl2	KAT3	2325.62	2433.96	2377.43	2260.99	1921.92	2144.78	1556.82	1678.15	1505.57	0.902142	0.1	0.408745	0.654833	0.1	0.178349
Q9DA08	Ccdc101	SGF29	1414.3	1256.64	1187.26	1327.56	1407.21	1270.22	1070.26	1028.09	1043.85	1.05644	0.7	0.870445	0.830667	0.1	0.178349
Q3TMW1	Ccdc102a	C102A	601.691	522.737	511.093	589.903	504.283	502.295	399.193	376.992	377.67	0.964697	0.4	0.691041	0.722486	0.1	0.178349
Q8C6E0	Ccdc104	CC104	751.31	701.207	696.172	672.112	670.326	633.547	518.857	377.287	437.536	0.95596	0.1	0.408745	0.623976	0.1	0.178349
Q9D4K7	Ccdc105	CC105	274.892	246.966	178.858	232.34	217.215	213.954	157.906	207.669	202.289	0.879534	0.7	0.870445	0.819097	0.4	0.503145
Q810S1	Ccdc109b	MCUB	276.755	378.708	458.118	241.485	284.103	365.183	352.684	123.647	263.999	0.75019	0.4	0.691041	0.697104	0.2	0.301331
Q8VE99	Ccdc115	CC115	1580.03	1413.33	1333.79	1334.65	1279.48	1472.23	880.898	677.495	985.339	0.94433	0.7	0.870445	0.623278	0.1	0.178349
Q6PB51	Ccdc117	CC117	461.758	371.731	424.125	466.106	491.055	406.268	296.17	339.231	309.308	1.09898	0.4	0.691041	0.729285	0.1	0.178349
Q8R344	Ccdc12	CCD12	962.778	720.938	838.273	929.89	1119.66	949.985	668.229	851.963	717.756	1.13326	0.4	0.691041	0.856232	0.4	0.503145
A2AEV7	Ccdc120	A2AEV7	32.7195	26.7771	24.3104	44.6233	45.3677	42.0808	70.5854	71.3311	66.6567	1.66647	0.1	0.408745	2.63604	0.1	0.178349
Q9D8X2	Ccdc124	CC124	2204.29	1872.57	1830.63	2182.37	2338.21	2135.42	1712.33	1756.63	1813.51	1.16544	0.4	0.691041	0.938085	0.1	0.178349
Q3TC33	Ccdc127	CC127	92.8644	110.939	139.915	126.613	116.615	116.613	208.31	218.285	181.161	1.05116	0.7	0.870445	1.8777	0.1	0.178349
Q9D516	Ccdc130	CC130	64.6316	78.9522	62.994	73.7405	85.9502	74.572	52.0782	45.588	54.0205	1.1538	0.4	0.691041	0.80577	0.1	0.178349
Q8CI71	Ccdc132	CC132	1333.24	1793.4	1635.13	1393.31	1496.16	1494.42	2024.27	1528.09	1785.69	0.913946	0.7	0.870445	1.09208	0.7	0.771399
Q8C7V8	Ccdc134	CC134	1064.59	1225.85	1039.94	976.718	1123.67	1054.82	859.945	985.901	1007.72	0.990823	0.7	0.870445	0.926085	0.1	0.178349
Q8R0K4	Ccdc137	CC137	448.455	444.672	417.785	705.742	708.7	637.538	495.435	415.403	491.113	1.58711	0.1	0.408745	1.10444	0.7	0.771399
F6V035	Ccdc149	F6V035	1112.67	928.252	1036.6	1036.17	1049.38	895.398	872.704	913.312	852.836	0.999585	0.7	0.870445	0.841891	0.1	0.178349
Q9D162	Ccdc167	CC167	194.669	233.118	200.887	145.974	192.216	172.059	182.108	206.406	190.053	0.856496	0.1	0.408745	0.946069	0.4	0.503145
Q3U155	Ccdc174	CC174	301.508	266.934	254.832	292.269	304.141	261.765	285.514	185.788	256.362	1.09491	0.7	0.870445	0.960395	0.7	0.771399
Q9JIG7	Ccdc22	CCD22	3271.65	3186.66	3301.16	3152.7	3319.03	3241.85	3343.51	3223.65	3421.61	0.990891	1	1	1.02196	0.4	0.503145
Q99LQ4	Ccdc23	CCD23	317.852	241.388	249.997	348.714	312.159	378.986	72.4299	82.0903	120.775	1.39487	0.2	0.528743	0.328365	0.1	0.178349
Q78PG9	Ccdc25	CCD25	2486.23	2362.74	2287.87	2672.43	2841.45	2669.17	2517.48	2140.88	2395.51	1.13107	0.1	0.408745	1.01387	1	1
Q3UFK1	Ccdc28a	Q3UFK1	146.215	124.22	125.932	157.63	170.538	160.118	94.2326	75.7132	98.1858	1.27146	0.1	0.408745	0.748282	0.1	0.178349
Q8CEG5	Ccdc28b	CC28B	33.0453	21.4887	23.8352	27.1127	27.4144	25.8686	19.7487	8.99513	15.046	1.13751	0.7	0.870445	0.631251	0.1	0.178349
Q3UHY7	Ccdc32	Q3UHY7	199.583	131.665	151.139	169.693	211.109	157.878	157.992	174.001	146.972	1.12276	0.4	0.691041	1.04534	1	1
Q9CR29	Ccdc43	CCD43	1172.87	966.466	1044.31	1096.48	1181.23	1005.55	986.408	820.582	1057.3	1.04996	0.7	0.870445	0.944555	0.7	0.771399
Q9D024	Ccdc47	CCD47	3588.8	4300.48	4630.07	3634.4	4535.89	4438.04	4564.1	5465.04	4640.31	1.03199	1	1	1.07902	0.2	0.301331
Q810U5	Ccdc50	CCD50	2464.82	2183.63	1980.67	2289.88	2132.99	2125.78	1178.54	994.223	1267.63	0.976809	1	1	0.539716	0.1	0.178349
Q3URS9	Ccdc51	CCD51	621.69	795.565	781.461	701.65	712.747	732.066	1013.83	923.675	962.313	0.91207	0.7	0.870445	1.23143	0.1	0.178349
Q9CR27	Ccdc53	CCD53	550.539	482.23	489.442	519.398	561.404	467.056	464.337	388.655	405.334	1.0612	1	1	0.828155	0.1	0.178349
Q8R3Q6	Ccdc58	CCD58	785.814	913.499	1030.07	887.998	1185.25	1062.14	1312.56	1243.29	1214.69	1.16272	0.4	0.691041	1.36102	0.1	0.178349
D3YZP9	Ccdc6	CCDC6	2656.44	2456.86	2446.74	2789.64	2806.07	2530.49	2594.72	2500.11	2603.73	1.13545	0.2	0.528743	1.05611	0.7	0.771399
Q3UJV1	Ccdc61	CCD61	81.5358	77.8351	74.3159	120.484	113.696	104.314	121.115	144.134	112.407	1.46073	0.1	0.408745	1.55605	0.1	0.178349
Q8CHW5	Ccdc64b	BICR2	1392.17	1354.38	1232.64	1650.69	1815.35	1567.32	1900.55	1814.9	1815.76	1.21878	0.1	0.408745	1.34066	0.1	0.178349
Q8BVC4	Ccdc68	CCD68	189.904	172.939	166.061	247.933	214.608	231.913	295.184	317.441	334.719	1.34101	0.1	0.408745	1.83557	0.1	0.178349
Q3TCJ8	Ccdc69	CCD69	257.625	273.079	239.795	233.128	206.405	199.801	160.257	177.526	162.965	0.801184	0.1	0.408745	0.632567	0.1	0.178349
Q8R2G6	Ccdc80	CCD80	44.695	58.414	48.948	75.3312	59.2282	51.2592	96.0529	102.955	101.155	1.21002	0.2	0.528743	2.06658	0.1	0.178349
Q6PDY0	Ccdc85b	CC85B	89.9939	70.078	73.228	80.3374	80.1713	79.3426	66.6971	47.8174	55.2936	1.09482	0.7	0.870445	0.755088	0.1	0.178349
E9Q6B2	Ccdc85c	CC85C	1228.81	1058.86	1221.31	1072.23	951.009	1229.58	795.005	746.427	864.961	0.877934	1	1	0.650944	0.1	0.178349
Q9JJ89	Ccdc86	CCD86	2277.2	1874.98	1655.33	2218.53	2805.53	2458.49	1434.69	1537.96	1411.36	1.31121	0.2	0.528743	0.765176	0.1	0.178349
Q5SNZ0	Ccdc88a	GRDN	1307.54	1207.94	1125.1	1163.12	1096.92	1034.1	789.226	691.559	795.196	0.908091	0.2	0.528743	0.653365	0.1	0.178349
Q4QRL3	Ccdc88b	CC88B	884.19	879.217	777.654	947.135	688.646	694.521	735.204	562.254	784.064	0.789931	0.7	0.870445	0.836203	0.2	0.301331
Q6VGS5	Ccdc88c	DAPLE	1835.35	2036.77	1841.58	2210.2	2449.91	2264.08	2484.49	2394.25	2453.12	1.22942	0.1	0.408745	1.33207	0.1	0.178349
Q8VC31	Ccdc9	CCDC9	547.106	571.668	471.777	628.128	748.161	500.685	507.517	389.426	479.233	1.14809	0.4	0.691041	0.875942	0.4	0.503145
Q8C3X2	Ccdc90b	CC90B	1343.98	1514.52	1469.64	1429.73	1557.51	1474.29	1743.28	1573.99	1642.85	1.00316	0.7	0.870445	1.11786	0.1	0.178349
Q9D8L5	Ccdc91	CCD91	2042.34	1837.77	1804.38	2386.76	2173.47	2313.62	2501.57	2690.09	2627.62	1.25893	0.1	0.408745	1.42979	0.1	0.178349
Q8VDN4	Ccdc92	CCD92	31.0198	30.375	27.7917	37.5889	35.0638	31.9692	30.6333	23.199	23.8842	1.15436	0.1	0.408745	0.786311	0.4	0.503145
Q7TQK5	Ccdc93	CCD93	1535.08	1778.42	1749.28	1809.39	1594.2	1639.37	2374.65	2434.97	2195.01	0.937168	1	1	1.3575	0.1	0.178349
Q9D6J3	Ccdc94	CCD94	477.135	448.733	403.665	525.527	500.117	470.704	308.977	309.096	334.669	1.11451	0.2	0.528743	0.688819	0.1	0.178349
Q9DBT3	Ccdc97	CCD97	712.05	596.882	617.364	687.721	620.249	679.996	495.731	548.023	508.028	1.10145	0.7	0.870445	0.822899	0.1	0.178349
Q9Z121	Ccl8	CCL8	116.103	87.4248	75.2662	73.2871	77.2047	64.2287	45.2874	26.2548	33.2577	0.838287	0.2	0.528743	0.380415	0.1	0.178349
Q8K2Y9	Ccm2	CCM2	1436.49	1344.75	1290.6	1252.93	1394.93	1247.79	1191.45	1173.34	1149.44	0.93172	0.4	0.691041	0.872534	0.1	0.178349
P51943	Ccna2	CCNA2	121.28	144.251	140.692	166.506	135.997	171.68	110.817	75.2167	117.13	1.18348	0.4	0.691041	0.787657	0.1	0.178349
P25322	Ccnd1	CCND1	406.186	397.547	382.026	322.636	325.569	343.048	292.589	242.242	266.383	0.818945	0.1	0.408745	0.670067	0.1	0.178349
O88874	Ccnk	CCNK	53.7771	52.2752	40.9845	86.7078	87.0572	78.7786	40.9943	34.6329	44.2635	1.65868	0.1	0.408745	0.784202	0.4	0.503145
Q52KE7	Ccnl1	CCNL1	52.0185	73.1797	67.7132	56.4444	90.1557	79.929	71.5853	36.7222	64.1109	1.1804	0.4	0.691041	0.946801	0.7	0.771399
Q9JJA7	Ccnl2	CCNL2	519.519	455.505	489.138	407.733	445.891	564.36	325.046	277.783	489.075	0.911585	0.7	0.870445	0.664528	0.2	0.301331
Q9QWV9	Ccnt1	CCNT1	233.209	276.775	247.157	328.144	251.69	244.172	321.464	356.601	337.322	1.01834	0.7	0.870445	1.36481	0.1	0.178349
Q8BGU5	Ccny	CCNY	347.438	378.193	366.507	326.268	354.544	378.412	315.256	267.499	303.338	0.967359	1	1	0.827646	0.1	0.178349
Q640L3	Ccpg1	CCPG1	304.317	289.611	311.406	235.988	268.926	261.186	209.941	219.286	221.142	0.85827	0.1	0.408745	0.720584	0.1	0.178349
Q9WU84	Ccs	CCS	1319.33	1116.36	1155.39	1244.67	1200.69	1135.23	1117.68	993.304	1008.04	1.03921	1	1	0.872467	0.2	0.301331
Q3UHI0-2	Ccser2	CCSE2	705.042	638.358	633.803	688.37	685.421	655.015	399.135	416.419	450.912	1.07373	0.7	0.870445	0.652328	0.1	0.178349
Q6RUT7	Ccsmst1	CSMT1	169.4	191.906	200.098	187.429	232.422	217.137	197.734	89.1636	189.747	1.13148	0.4	0.691041	0.98875	0.7	0.771399
P80314	Cct2	TCPB	12307.7	12775.6	13085.5	12169.1	11362.4	12088.4	14033.3	12960.5	14736	0.94621	0.1	0.408745	1.09844	0.2	0.301331
P80318	Cct3	TCPG	5427.91	6884.3	7490.07	6701.6	7762.71	6968.18	11591.5	12018.4	10537.4	1.01218	0.7	0.870445	1.68376	0.1	0.178349
P80315	Cct4	TCPD	9779.7	11585.8	11690.4	7511.11	10693	10604.6	15349.8	13634	10212.5	0.91531	0.4	0.691041	1.17678	0.4	0.503145
P80316	Cct5	TCPE	15213	16560.2	16764.4	16284.7	14858.6	15163	18234.3	16451.5	17269.9	0.915629	0.2	0.528743	1.04286	0.4	0.503145
P80317	Cct6a	TCPZ	7224.28	8999.6	8915.36	7938.67	8014.48	8634.72	10699.1	9927.35	10293.3	0.898952	0.7	0.870445	1.15456	0.1	0.178349
P80313	Cct7	TCPH	7926.51	9467.79	10160	8267.49	8786	9321.89	10397	9106.36	9534.26	0.927988	0.7	0.870445	1.00702	0.7	0.771399
P42932	Cct8	TCPQ	10640.4	12928.7	13630.1	12252.4	12842.9	13041.8	16828.9	16297.1	14685.8	0.993364	1	1	1.26054	0.1	0.178349
Q8C1Y8	Ccz1	CCZ1	1586.92	1973.28	1930.75	1765.73	2006.39	2036.54	2416.79	2638.22	2216.01	1.03918	0.4	0.691041	1.25174	0.1	0.178349
Q8R422	Cd109	CD109	3889.55	4633.82	4348.5	3147.03	3015.44	4356.46	2255.61	1614.02	2396.98	0.723705	0.4	0.691041	0.51871	0.1	0.178349
P10810	Cd14	CD14	1589.52	1349.15	1388.3	1391.93	1149.26	1428.05	1109.62	945.297	1194.14	1.00262	1	1	0.799265	0.1	0.178349
O35566	Cd151	CD151	36.3071	36.4711	35.2353	30.9534	31.2296	33.8568	64.614	42.2901	47.5715	0.860151	0.1	0.408745	1.31025	0.1	0.178349
Q2VLH6	Cd163	C163A	1019.12	670.928	776.871	858.591	761.289	1320.86	659.738	476.028	564.668	1.10519	0.7	0.870445	0.726849	0.1	0.178349
Q8R2S8	Cd177	CD177	6755.53	6812.68	7084.71	7049.13	5124.49	4752.08	4175.75	4814.79	4370.47	0.752199	0.4	0.691041	0.64152	0.1	0.178349
Q62192	Cd180	CD180	369.011	385.129	346.611	258.121	288.071	339.656	269.556	194.786	283.594	0.780657	0.1	0.408745	0.730482	0.1	0.178349
P11609	Cd1d1	CD1D1	336.749	366.904	348.127	353.781	373.957	298.721	485.611	401.604	434.303	1.01624	1	1	1.24754	0.1	0.178349
P08920	Cd2	CD2	242.231	309.543	286.908	271.794	294.987	190.586	196.035	202.269	225.995	0.947321	0.7	0.870445	0.704996	0.1	0.178349
O54901	Cd200	OX2G	2869.47	2434.75	2495.88	1953.72	2092.54	2231.46	1697.56	1456.79	1893.69	0.838398	0.1	0.408745	0.680145	0.1	0.178349
P35329	Cd22	CD22	97.2137	103.722	95.3568	76.5812	62.4035	49.5132	36.0445	45.0197	46.3998	0.641921	0.1	0.408745	0.4631	0.1	0.178349
Q91V98	Cd248	CD248	241.107	215.504	226.124	230.499	205.799	230.611	205.246	215.851	193.529	1.01935	1	1	0.90767	0.2	0.301331
Q9EP73	Cd274	PD1L1	299.588	289.258	245.192	223.669	212.21	216.837	212.48	167.364	211.218	0.749632	0.1	0.408745	0.730206	0.1	0.178349
Q9JLQ0	Cd2ap	CD2AP	9976.12	8632.29	8801.2	11181.3	11827.9	9917.49	9761.01	10856.7	10589.4	1.27043	0.2	0.528743	1.20318	0.2	0.301331
Q9CWK3	Cd2bp2	CD2B2	1714.48	1393.98	1369.52	1560.11	1549.97	1394.25	1085.74	1029.29	1084.53	1.1119	0.7	0.870445	0.77801	0.1	0.178349
Q6SJQ5	Cd300lh	CLM3	309.975	277.101	250.374	266.152	200.793	198.913	214.094	116.444	148.092	0.72462	0.2	0.528743	0.534433	0.1	0.178349
Q64314	Cd34	CD34	1239.4	910.006	983.319	964.337	654.427	828.422	665.89	571.662	711.203	0.842475	0.2	0.528743	0.677186	0.1	0.178349
Q08857	Cd36	CD36	1428.72	1454.64	1633.66	948.972	1164.81	1306.59	842.49	699.781	1025.93	0.800755	0.1	0.408745	0.579174	0.1	0.178349
P56528	Cd38	CD38	1207.46	1200.6	1199.09	1074.66	1092.13	1399.13	1369.79	1151.97	1239.66	0.909654	0.7	0.870445	1.03253	0.7	0.771399
Q76KJ5	Cd3eap	RPA34	321.537	274.361	263.647	352.203	422.112	456.791	248.353	212.886	252.028	1.53853	0.1	0.408745	0.905205	0.1	0.178349
P15379	Cd44	CD44	5543.26	4804.63	5118.52	4172.08	4008.85	4309.67	2915.76	2788.75	2768.49	0.815095	0.1	0.408745	0.544835	0.1	0.178349
Q61735-2	Cd47	CD47	807.426	906.54	824.209	754.19	759.476	845.646	711.042	629.818	739.29	0.92146	0.4	0.691041	0.862696	0.1	0.178349
Q61735	Cd47	CD47	259.745	240.314	224.694	198.104	208.205	231.024	199.146	118.955	171.587	0.866387	0.2	0.528743	0.714012	0.1	0.178349
P18181	Cd48	CD48	992.745	953.377	916.398	845.404	576.202	586.877	527.486	419.881	622.718	0.615577	0.1	0.408745	0.553282	0.1	0.178349
Q61475	Cd55	DAF1	413.137	364.559	362.388	374.338	278.593	247.648	308.654	343.483	372.371	0.764192	0.4	0.691041	0.942188	0.4	0.503145
O55186	Cd59a	CD59A	284.205	194.257	167.388	122.51	172.204	188.331	77.9716	76.7995	61.9598	0.886475	0.4	0.691041	0.39535	0.1	0.178349
P41731	Cd63	CD63	993.553	1044.67	1137.67	871.584	1109.78	1358.42	1020.92	1182.2	1308.32	1.06233	1	1	1.13165	0.4	0.503145
P31996	Cd68	CD68	676.649	603.996	563.333	562.907	368.369	402.696	293.672	247.008	364.882	0.66672	0.1	0.408745	0.486215	0.1	0.178349
P21855	Cd72	CD72	878.12	966.351	935.608	666.606	755.301	863.735	642.413	396.929	710.808	0.807284	0.1	0.408745	0.686626	0.1	0.178349
P04441-2	Cd74	HG2A	274.917	362.995	268.131	223.06	232.656	185.871	204.123	159.855	186.327	0.811372	0.1	0.408745	0.677757	0.1	0.178349
P04441	Cd74	HG2A	5845.03	7702.17	6389.82	3721.9	4443.95	3226.54	3244.82	2414.73	2785.96	0.582473	0.1	0.408745	0.436	0.1	0.178349
P11911	Cd79a	CD79A	245.046	198.877	205.475	196.904	152.938	105.829	62.0638	50.9211	68.9941	0.744314	0.1	0.408745	0.30205	0.1	0.178349
P15530	Cd79b	CD79B	35.481	41.0918	43.2317	24.9795	37.719	27.0765	1.69965	7.74301	10.6963	0.658927	0.2	0.528743	0.188432	0.1	0.178349
P35762	Cd81	CD81	664.327	717.466	727.333	547.714	525.358	707.86	405.623	262.695	359.104	0.763401	0.2	0.528743	0.500517	0.1	0.178349
P40237	Cd82	CD82	1028.67	1132.07	1202.67	992.272	1070.93	1163.06	1055.34	905.574	1132.9	0.945993	0.7	0.870445	0.932222	0.7	0.771399
Q18PI6	Cd84	SLAF5	44.4509	40.9093	41.9516	39.6359	39.4756	37.1704	35.5423	26.4903	36.2041	0.94098	0.1	0.408745	0.847222	0.1	0.178349
O89103	Cd93	C1QR1	1188.08	1104.9	1119.05	993.053	1002.51	1060.85	785.791	739.016	871.407	0.895858	0.1	0.408745	0.702195	0.1	0.178349
Q9Z0M6	Cd97	CD97	4153.31	3049.51	2849.08	3219.75	2575.76	2370.86	2236.23	1994.37	1913.9	0.844647	0.4	0.691041	0.653997	0.1	0.178349
Q8BIF0	Cd99l2	C99L2	261.746	247.137	189.772	271.869	251.115	258.594	122.839	67.8004	76.8758	1.04636	0.4	0.691041	0.311066	0.1	0.178349
P56389	Cda	CDD	587.292	521.872	487.353	1166.52	1233.72	987.926	1731.18	1820.45	1858.19	2.23526	0.1	0.408745	3.48831	0.1	0.178349
Q8BMD5	Cdadc1	CDAC1	127.081	130.006	141.058	162.771	142.171	138.265	160.226	189.811	164.803	1.09357	0.2	0.528743	1.26766	0.1	0.178349
Q8CII2	Cdc123	CD123	1133.18	1076.05	1013.93	1270.46	1278.65	1118.72	986.131	864.957	891.312	1.18067	0.2	0.528743	0.828318	0.1	0.178349
Q6GQT0	Cdc14a	CC14A	42.7538	47.4085	47.7791	56.9121	50.3845	51.4295	53.9645	69.4499	66.0247	1.08482	0.1	0.408745	1.39268	0.1	0.178349
Q8R349	Cdc16	CDC16	2111.66	2436.91	2341.47	2365.23	2403.79	2491.09	2803.24	2460.12	2414.72	1.02662	0.4	0.691041	1.05067	0.2	0.301331
Q9JJ66	Cdc20	CDC20	124.224	139.585	127.804	167.608	157.458	191.254	131.806	123.779	139.37	1.31145	0.1	0.408745	1.03131	1	1
Q8BGZ4	Cdc23	CDC23	472.526	615.582	637.526	474.051	548.591	684.058	723.084	763.28	676.322	0.891175	1	1	1.17464	0.1	0.178349
Q99JP4	Cdc26	CDC26	1065.23	939.86	841.294	1127.3	1222.55	898.768	601.23	679.113	704.097	1.19943	0.4	0.691041	0.722568	0.1	0.178349
A2A6Q5	Cdc27	CDC27	374.954	518.226	456.434	446.117	474.22	455.577	515.715	374.012	474.156	0.998122	1	1	1.03883	1	1
Q8CFI2	Cdc34	UB2R1	238.903	181.405	183.65	218.625	204.156	188.354	172.608	169.753	166.623	1.11166	0.7	0.870445	0.924329	0.1	0.178349
Q61081	Cdc37	CDC37	4941.48	5362.98	5996.22	5247.26	5968.19	5394.59	5618.88	3864.72	5261.31	1.00589	1	1	0.981042	0.7	0.771399
Q9CZP7	Cdc37l1	CD37L	132.094	134.101	141.757	147.345	168.188	131.071	118.527	115.067	127.109	1.09876	0.7	0.870445	0.883864	0.1	0.178349
Q9DC48	Cdc40	PRP17	1288.98	1376.85	1295.43	1493.1	1436.44	1447.57	1232.55	1151.31	1258.63	1.11744	0.1	0.408745	0.95146	0.1	0.178349
P60766	Cdc42	CDC42	2145.02	1758.78	2177.47	2064.66	1750.05	1778.95	1661.75	1622.69	1375.74	0.82934	0.4	0.691041	0.756492	0.1	0.178349
Q3UU96	Cdc42bpa	MRCKA	968.757	1201.65	1043.79	1109.72	1112.22	1069.72	1206.14	1436.58	1243.55	1.06316	0.7	0.870445	1.19138	0.1	0.178349
Q7TT50	Cdc42bpb	MRCKB	5505.49	6387.85	6717.16	5834.96	6421.22	7191.34	8037.89	8201.12	7680.16	1.00522	0.7	0.870445	1.25831	0.1	0.178349
Q80UW5	Cdc42bpg	MRCKG	2902.68	3091.02	2946.52	3356.2	3333.74	3353.93	3725.23	4022.62	3576.94	1.13827	0.1	0.408745	1.26428	0.1	0.178349
Q91W92	Cdc42ep1	BORG5	1245.32	1092.43	1056.29	1181.47	1251.14	1117.68	539.749	428.48	633.96	1.08151	0.4	0.691041	0.494081	0.1	0.178349
Q8JZX9	Cdc42ep2	BORG1	94.6313	99.7283	82.4598	137.422	145.875	125.052	86.156	82.6699	92.7415	1.45218	0.1	0.408745	0.910439	0.7	0.771399
Q9CQC5	Cdc42ep3	BORG2	48.4806	52.4509	44.9524	52.6653	49.1382	53.9622	29.1851	31.7839	30.5153	1.08632	0.2	0.528743	0.629433	0.1	0.178349
Q9JM96	Cdc42ep4	BORG4	1213.03	1063.43	1005.1	1246.34	1336.56	1187.62	793.197	769.425	785.317	1.172	0.2	0.528743	0.738475	0.1	0.178349
Q9Z0X0	Cdc42ep5	BORG3	54.213	69.4135	66.1584	68.2568	87.4467	85.6869	91.9603	52.6564	78.2464	1.29518	0.2	0.528743	1.18271	0.7	0.771399
Q8BGH7	Cdc42se2	C42S2	224.682	251.364	230.87	285.459	272.217	249.812	149.815	98.9924	174.008	1.17909	0.2	0.528743	0.648915	0.1	0.178349
Q6A068	Cdc5l	CDC5L	6167.48	5669.56	5306.38	7011.52	6657.97	6108.12	5285.45	5014.54	5558.63	1.17434	0.2	0.528743	0.93225	0.2	0.301331
Q8JZM7	Cdc73	CDC73	2024.77	2422.4	2046	2795.26	2534.04	2111.04	3229.98	3461.95	3561.03	1.23853	0.2	0.528743	1.69206	0.1	0.178349
Q99M54	Cdca3	CDCA3	337.401	292.938	302.894	389.465	328.062	334.823	158.856	141.443	176.843	1.10541	0.4	0.691041	0.524461	0.1	0.178349
Q9CPY3	Cdca5	CDCA5	103.893	126.884	118.78	157.25	140.013	133.187	121.193	130.599	106.046	1.17876	0.1	0.408745	1.02032	0.7	0.771399
Q8BHX3	Cdca8	BOREA	161.043	185.987	168.126	293.531	294.44	282.251	253.156	310.375	249.607	1.7459	0.1	0.408745	1.50575	0.1	0.178349
Q5U462	Cdcp1	CDCP1	1090.93	1284.41	1219.97	1145.29	1231.5	1386.77	1392.88	1146.45	1315.98	1.00945	0.7	0.870445	1.0787	0.4	0.503145
P09803	Cdh1	CADH1	10542.6	8044.04	7658.2	10169.1	11061.6	9995.89	7915.08	7928.2	7921.7	1.26418	0.4	0.691041	0.984791	0.7	0.771399
P55288	Cdh11	CAD11	3179.98	2718.91	2751.45	2821.38	2744.27	2588.28	2438.37	2441.25	2310.71	0.99739	0.7	0.870445	0.886213	0.1	0.178349
Q9WTR5	Cdh13	CAD13	8403.5	5874.44	6290.06	6237.9	4487.36	4799.6	3503.43	3942.02	4077.5	0.763045	0.2	0.528743	0.626706	0.1	0.178349
Q9R100	Cdh17	CAD17	14895.4	13620.2	13605	18485.2	17507.1	15856.1	22972.8	25230.7	23710.5	1.28538	0.1	0.408745	1.74083	0.1	0.178349
E9Q3A7	Cdh19	E9Q3A7	370.604	295.919	274.241	257.988	225.342	263.683	207.291	191.1	216.278	0.87182	0.1	0.408745	0.700499	0.1	0.178349
P15116	Cdh2	CADH2	870.459	665.486	647.076	676.461	568.694	572.185	451.365	449.426	444.049	0.8598	0.4	0.691041	0.675335	0.1	0.178349
P55284	Cdh5	CADH5	1373.92	1303	1151.11	1195.76	1073.94	1078.53	1062.78	1059.17	1156.64	0.827728	0.2	0.528743	0.815641	0.2	0.301331
E9Q7P9	Cdhr2	E9Q7P9	2918.93	2822.5	2647.32	4037.26	3883.62	4196.65	4170.16	3950.53	4184.22	1.43038	0.1	0.408745	1.47747	0.1	0.178349
Q8VHF2	Cdhr5	CDHR5	3479.75	3229.56	3213.73	3958.54	4209.33	3911.96	4799.82	4700.21	5235.84	1.22572	0.1	0.408745	1.48622	0.1	0.178349
Q8VDP6	Cdipt	CDIPT	160.821	182.361	213.663	149.167	157.251	211.087	190.675	106.554	184.971	0.862306	0.4	0.691041	1.01431	1	1
P11440	Cdk1	CDK1	1883.13	2208.69	2109.59	2561.6	2914.52	2798.82	2636.67	3611.85	2815.27	1.32671	0.1	0.408745	1.33451	0.1	0.178349
P24788	Cdk11b	CD11B	4563.11	4659.49	4396.45	4366.59	5012.69	4969.05	4709.27	4242.98	4544.78	1.08896	0.7	0.870445	0.995983	1	1
Q14AX6	Cdk12	CDK12	924.262	883.711	814.318	857.478	954.874	990.647	694.69	793.029	781.935	1.08053	0.4	0.691041	0.884831	0.1	0.178349
Q69ZA1	Cdk13	CDK13	1675.78	1531.12	1276.79	1799.47	1731.63	1682.03	1004.19	985.907	1038.75	1.13096	0.1	0.408745	0.655853	0.1	0.178349
Q04735	Cdk16	CDK16	159.732	172.435	177.129	206.676	176.582	167.62	196.897	250.968	200.073	1.02405	0.7	0.870445	1.16028	0.1	0.178349
Q8K0D0	Cdk17	CDK17	740.843	756.354	758.095	733.708	720.145	702.445	739.704	937.032	685.369	0.952127	0.1	0.408745	0.977986	0.7	0.771399
Q04899	Cdk18	CDK18	421.359	561.001	532.423	560.318	568.224	575.112	964.378	1158.47	858.413	1.06724	0.2	0.528743	1.8113	0.1	0.178349
Q8BWD8	Cdk19	CDK19	409.173	525.962	491.673	479.696	551.856	494.197	627.087	738.664	649.741	1.00513	0.7	0.870445	1.32149	0.1	0.178349
P97377	Cdk2	CDK2	925.871	1166.42	1099.18	997.099	1023.29	1110.3	1134.12	955.356	1112.85	0.930958	1	1	1.01244	1	1
P30285	Cdk4	CDK4	253.788	249.454	204.161	274.251	216.286	215.231	182.098	164.941	183.15	0.867038	1	1	0.729986	0.1	0.178349
P49615	Cdk5	CDK5	2643.2	2899.22	2459.23	2512.2	2901.56	2744.32	2567.57	2544.21	2800.05	1.03826	0.7	0.870445	0.971387	1	1
Q8K389	Cdk5rap2	CK5P2	1164.58	1332.95	1219.23	1328.22	1260.86	1413.72	1247.16	1120.69	1195.6	1.08939	0.4	0.691041	0.980619	0.7	0.771399
Q99LM2	Cdk5rap3	CK5P3	3201.63	3593.01	3706.95	3179.15	3238.69	2992.23	3761.81	3202.99	3330.05	0.884815	0.2	0.528743	0.926813	1	1
Q64261	Cdk6	CDK6	463.681	506.156	508.42	445.226	497.941	496.815	464.59	468.958	441.879	0.981545	0.4	0.691041	0.917879	0.4	0.503145
Q03147	Cdk7	CDK7	121.204	182.518	152.102	139.122	171.781	135.048	181.908	214.735	208.262	0.914663	1	1	1.36923	0.2	0.301331
Q99J95	Cdk9	CDK9	1144.09	1315.56	1335.61	1386.98	1446.52	1318.78	1493.1	1789.04	1472.09	1.05429	0.2	0.528743	1.13495	0.1	0.178349
Q91WE6	Cdkal1	CDKAL	767.449	886.02	768.798	993.076	899.715	885.104	1101.17	1391.58	1064.8	1.17029	0.2	0.528743	1.43233	0.1	0.178349
P46414	Cdkn1b	CDN1B	1196.82	942.905	862.439	1043.66	1089.72	1022.59	706.308	612.599	738.85	1.10686	0.7	0.870445	0.749077	0.1	0.178349
Q8BI72	Cdkn2aip	CARF	953.376	1028.16	969.127	1041.77	1010.27	1075.58	1032.59	943.484	989.979	1.07496	0.2	0.528743	1.02152	1	1
Q9D211	Cdkn2aipnl	C2AIL	271.702	228.202	191.028	259.759	260.951	247.619	213.944	198.106	228.872	1.13828	0.7	0.870445	0.93752	1	1
P55271	Cdkn2b	CDN2B	324.079	310.783	236.527	407.772	417.179	303.048	433.796	409.245	378.079	1.31208	0.4	0.691041	1.31682	0.1	0.178349
Q60772	Cdkn2c	CDN2C	1651.4	1507.84	1416.06	1540.63	1391.66	1061.73	1382.3	1108.38	1434.41	0.922949	0.4	0.691041	0.916742	0.2	0.301331
A2A6T1	Cdr2l	CDR2L	28.5728	21.988	20.6021	26.0208	29.1737	21.1381	18.7836	24.4929	20.3096	1.18341	0.7	0.870445	0.923667	0.4	0.503145
P98191	Cds1	CDS1	42.0346	49.1221	48.7549	43.072	63.8767	67.2881	47.3708	21.322	42.1203	1.31016	0.4	0.691041	0.863919	0.4	0.503145
Q99L43	Cds2	CDS2	495.59	643.519	543.267	276.691	450.39	549.269	233.367	88.6265	325.907	0.82904	0.4	0.691041	0.429562	0.1	0.178349
Q4VAA2	Cdv3	CDV3	3543.27	2518.87	2783.33	2789.7	3954.01	3597.77	1502.49	1034.97	1684.46	1.29261	0.2	0.528743	0.539817	0.1	0.178349
P18111	Cdx1	CDX1	143.731	128.277	125.37	150.063	197.813	172.394	100.922	97.7957	96.5697	1.34392	0.1	0.408745	0.762379	0.1	0.178349
P43241	Cdx2	CDX2	308.864	329.517	270.768	340.046	397.908	400.935	278.176	182.506	235.746	1.28829	0.1	0.408745	0.763268	0.2	0.301331
Q9WTK2	Cdyl	CDYL	172.722	177.345	148.519	179.419	193.217	178.964	151.409	88.496	145.858	1.03877	0.1	0.408745	0.844467	0.2	0.301331
Q9D5D8	Cdyl2	CDYL2	25.5579	26.6112	27.5163	24.4134	34.3768	27.2682	56.2931	61.278	43.6513	1.02469	1	1	2.11539	0.1	0.178349
P31809	Ceacam1	CEAM1	1863.9	1483.37	1434.15	1923.67	2072.51	1734.83	1860.82	2213.09	2043.74	1.29682	0.2	0.528743	1.37777	0.2	0.301331
Q61400	Ceacam10	CEAMA	1676.29	1154.13	312.119	179.53	1629.67	2205.55	145.728	330.399	329.014	1.41203	1	1	0.285075	0.4	0.503145
Q9D2Z1	Ceacam20	Q9D2Z1	807.929	890.713	766.258	1191.02	1215.55	1201.02	1425.75	1342.42	1737.88	1.48654	0.1	0.408745	1.7647	0.1	0.178349
P28033	Cebpb	CEBPB	88.128	76.2067	65.2594	95.3814	105.367	90.8169	47.6501	47.8887	34.0685	1.25161	0.1	0.408745	0.625274	0.1	0.178349
Q00322	Cebpd	CEBPD	49.9283	43.6799	54.669	77.9833	63.0216	83.1475	36.0486	26.9946	25.4674	1.56191	0.1	0.408745	0.540667	0.1	0.178349
P53569	Cebpz	CEBPZ	951.111	1094.77	1175.61	1010.15	1147.75	1187.5	1174.21	1509.08	1144.27	1.04839	0.7	0.870445	1.07256	0.4	0.503145
Q91WM2	Cecr5	CECR5	3321.08	3093.01	2905.93	2959.9	2929.57	2989.67	2871.5	3362.03	2971.53	0.956964	0.7	0.870445	0.960724	1	1
Q91X79	Cela1	CELA1	1170.31	1000.81	518.443	895.829	533.736	499.335	701.688	1503.62	957.588	0.533304	0.4	0.691041	0.956813	1	1
P05208	Cela2a	CEL2A	831.825	518.386	132.291	278.321	112.477	98.6161	163.484	339.593	318.906	0.216975	0.2	0.528743	0.61519	0.7	0.771399
Q9CQ52	Cela3b	CEL3B	1770.37	793.313	324.96	2371.82	571.306	384.39	1384.57	2927.46	866.51	0.720152	1	1	1.7453	0.4	0.503145
P28659-4	Celf1	CELF1	1293.39	1619.86	1513.51	1542.81	1449.47	1510.45	1834.29	1487.16	1568.39	0.997978	1	1	1.03626	0.7	0.771399
V9GX43	Celf2	V9GX43	1336.98	1265.59	1152.52	1216.42	1080.72	966.181	632.644	608.139	719.288	0.853926	0.2	0.528743	0.499881	0.1	0.178349
O35161	Celsr1	CELR1	121.1	117.742	115.526	162.108	131.251	129.509	134.198	140.267	131.924	1.11473	0.1	0.408745	1.13976	0.1	0.178349
P49452	Cenpc	CENPC	183.392	215.598	168.963	263.247	232.971	207.742	239.874	232.962	215.957	1.27034	0.2	0.528743	1.27029	0.1	0.178349
Q6RT24	Cenpe	CENPE	38.8259	47.8842	48.6706	51.663	42.4639	53.198	56.5932	55.7505	53.9132	1.07892	0.4	0.691041	1.16428	0.1	0.178349
E9Q3P4	Cenpf	E9Q3P4	521.536	572.19	551.999	498.536	646.191	593.612	608.928	563.502	521.725	1.07539	0.7	0.870445	1.02084	0.7	0.771399
Q9QYM8	Cenph	CENPH	99.4821	145.202	114.451	135.42	135.265	148.878	123.876	74.2688	118.625	1.18321	0.4	0.691041	1.03647	1	1
Q9CXS4	Cenpv	CENPV	1012.75	1311.89	1250.5	1675.07	1492.65	1532.33	1725.72	1750.77	1812.93	1.22537	0.1	0.408745	1.40006	0.1	0.178349
Q7TSG1	Cep120	CE120	51.3679	45.1792	40.0596	52.3192	45.193	38.0381	48.414	53.0268	44.6259	1.0003	1	1	1.0716	0.7	0.771399
Q8BI22	Cep128	CE128	846.92	806.18	727.271	917.588	871.619	776.802	802.744	695.157	758.635	1.08117	0.4	0.691041	0.941024	0.4	0.503145
Q62036	Cep131	CP131	2656.53	2700.13	2664.17	2691.91	2680.41	2544.2	2551.97	1975.14	2409.63	1.0061	1	1	0.904458	0.1	0.178349
Q6P5D4	Cep135	CP135	877.379	968.226	934.313	1006.66	951.463	981.495	955.822	929.702	1016.67	1.0505	0.2	0.528743	1.02302	0.7	0.771399
Q6A065	Cep170	CE170	3507.25	3034.82	2897.12	2917.11	2977.46	2838.77	1901.05	1592.15	1884.51	0.961214	0.4	0.691041	0.620963	0.1	0.178349
Q80U49	Cep170b	C170B	3268.16	3121.08	2926.83	3869.12	3939.95	3497.77	3274.69	3032.18	3271.95	1.23967	0.1	0.408745	1.04834	0.4	0.503145
E9Q4Y4	Cep192	E9Q4Y4	332.76	396.342	374.083	405.049	403.509	454.654	370.867	411.141	373.404	1.08278	0.1	0.408745	0.998185	1	1
Q60952	Cep250	CP250	219.311	223.101	221.504	197.499	232.469	213.259	215.941	177.862	451.76	0.962777	0.7	0.870445	0.974885	0.7	0.771399
E9Q309	Cep350	E9Q309	436.386	447.763	438.015	519.016	497.777	535.175	520.119	383.213	408.232	1.18493	0.1	0.408745	0.932005	0.7	0.771399
Q99NF3	Cep41	CEP41	421.442	489.726	414.808	498.254	431.649	419.999	459.424	469.725	460.462	1.02422	0.7	0.870445	1.09259	0.7	0.771399
Q5HZK1	Cep44	CEP44	259.216	259.082	263.501	238.608	227.995	296.918	244.644	204.754	224.889	0.920499	0.7	0.870445	0.867574	0.1	0.178349
Q8BT07	Cep55	CEP55	2223.52	2564.34	2445.93	2465.68	2683.42	2603.12	2780.88	2880.08	2794.59	1.06427	0.2	0.528743	1.14255	0.1	0.178349
Q8CEE0	Cep57	CEP57	162.356	148.71	124.832	151.324	163.906	138.326	110.916	108.52	124.309	1.01758	0.7	0.870445	0.745854	0.1	0.178349
Q3UPP8	Cep63	CEP63	318.902	287.635	250.466	343.201	366.429	350.917	269.344	310.091	269.95	1.22001	0.1	0.408745	0.938516	1	1
Q8C0D9	Cep68	CEP68	234.871	204.574	185.937	216.132	200.358	213.234	164.338	175.636	163.15	1.04233	1	1	0.803318	0.1	0.178349
Q6IRU7	Cep78	CEP78	36.1688	45.3941	34.9078	58.9172	38.0527	41.0766	50.0565	37.6665	47.6229	1.13569	0.4	0.691041	1.31669	0.2	0.301331
Q9D5R3	Cep83	CEP83	85.4624	69.9379	61.623	65.7818	60.3247	80.6689	57.2911	55.7149	60.8751	0.940574	0.7	0.870445	0.819171	0.1	0.178349
Q8BMK0	Cep85	CEP85	79.3377	61.4578	73.2413	87.3367	74.0704	70.2834	57.1687	69.0508	58.9577	1.01132	0.7	0.870445	0.804979	0.2	0.301331
Q8BGS7	Cept1	CEPT1	109.649	131.767	122.124	99.0682	129.8	123.702	123.671	175.564	134.304	1.01292	1	1	1.09973	0.2	0.301331
Q924Z4	Cers2	CERS2	345.166	408.742	430.237	359.596	474.218	473.899	440.36	281.882	469.77	1.15941	0.4	0.691041	1.07735	0.7	0.771399
Q9D6J1	Cers4	CERS4	421.008	530.049	626.597	299.874	379.483	608.184	359.125	337.087	473.148	0.715939	0.4	0.691041	0.677532	0.2	0.301331
Q8C172	Cers6	CERS6	1063	1381.86	1470.65	1046.45	1309.83	1369.06	1160.14	703.606	1187.39	0.947875	0.4	0.691041	0.83955	0.4	0.503145
Q8VCC2	Ces1	EST1	6063.45	6581.88	8337.44	3699.8	4060.3	4941.93	2741.73	1446.65	2742.93	0.616891	0.1	0.408745	0.416557	0.1	0.178349
D3Z5G7	Ces1b	D3Z5G7	1245.31	1788.7	2186.12	1432.84	1542.14	2102.37	1595.04	470.095	1573.27	0.862157	1	1	0.879561	0.4	0.503145
P23953	Ces1c	EST1C	8956.25	6578.64	6741.29	5947.13	4934.65	5084.69	5052.24	4901.2	4353.69	0.754261	0.1	0.408745	0.727042	0.1	0.178349
Q8VCT4	Ces1d	CES1D	5753.16	5825.72	5990.46	3722.93	3839.08	4070.06	3180.01	2330.36	2777.88	0.658988	0.1	0.408745	0.47683	0.1	0.178349
Q64176	Ces1e	EST1E	1200.79	1321.86	1124.3	873.54	940.676	965.826	742.493	632.697	764.839	0.783381	0.1	0.408745	0.618337	0.1	0.178349
Q91WU0	Ces1f	Q91WU0	6059.53	6562.93	7557.74	5662.93	7136.1	5615.8	7859.44	6677.43	6726.19	0.862866	0.4	0.691041	1.02488	0.4	0.503145
Q8QZR3	Ces2a	EST2A	2828.12	3445.74	3416.46	5006.5	6266.2	5406.45	6389.53	3227.93	3819.26	1.58247	0.1	0.408745	1.1179	0.4	0.503145
Q91WG0	Ces2c	EST2C	2725.04	3646.39	3447.31	3141.27	4045.26	3987.2	4759.59	2833.01	3893.69	1.15661	0.4	0.691041	1.12949	0.4	0.503145
Q8BK48	Ces2e	EST2E	4097.78	4862.88	4245.24	7021.65	8281.66	6955.55	10247.2	8393.42	9654.28	1.654	0.1	0.408745	2.27414	0.1	0.178349
Q08ED5	Ces2f	Q08ED5	107.785	151.04	97.9375	147.16	142.096	102.932	215.357	172.325	189.903	1.31833	1	1	1.76187	0.1	0.178349
E9PV38	Ces2g	E9PV38	719.506	821.092	721.307	993.391	1181.77	872.755	1486.51	1370.61	1415.73	1.37721	0.1	0.408745	1.96273	0.1	0.178349
Q9R1K9	Cetn2	CETN2	1245.25	905.154	1032.31	844.741	796.427	1014.21	711.516	922.961	860.948	0.818302	0.2	0.528743	0.834001	0.2	0.301331
O35648	Cetn3	CETN3	2366.75	1758.01	2066.7	2080.29	2389.16	1916.3	1486.37	1603.81	1437.43	1.00658	0.7	0.870445	0.7192	0.1	0.178349
P04186	Cfb	CFAB	5717.31	5561.2	4976.18	3536.68	4109.53	4054.28	3722.88	3773.65	3898.39	0.72903	0.1	0.408745	0.678568	0.1	0.178349
P03953	Cfd	CFAD	276.099	187.761	247.359	267.123	209.439	189.4	211.079	197.67	155.812	0.846701	1	1	0.799122	0.4	0.503145
O88271	Cfdp1	CFDP1	4012.01	3297.55	3317.72	4204.16	4534.21	3712.08	2790.54	2682.64	2688.84	1.26718	0.2	0.528743	0.810448	0.1	0.178349
P06909	Cfh	CFAH	2217.61	2206.42	1799.27	1253.06	1330.66	1398.18	1239.84	1090.25	1173.37	0.603086	0.1	0.408745	0.531798	0.1	0.178349
Q61129	Cfi	CFAI	2814.9	1880.7	1736.27	1537.77	1121.5	1240.2	1072.27	568.015	619.065	0.659435	0.1	0.408745	0.329167	0.1	0.178349
P18760	Cfl1	COF1	7366.91	6628.15	6804.95	7776.42	6543.22	5806.62	6399.11	5152.99	6086.65	0.961538	0.7	0.870445	0.894444	0.1	0.178349
P45591	Cfl2	COF2	5964.33	5174.59	6005.88	4613.01	4481.46	5039.12	3784.72	4265.94	3906.21	0.773433	0.1	0.408745	0.654929	0.1	0.178349
P11680	Cfp	PROP	278.335	220.307	234.583	203.145	175.79	166.926	95.423	88.116	111.467	0.749372	0.1	0.408745	0.406777	0.1	0.178349
Q8BHG9	Cggbp1	CGBP1	773.394	679.658	675.989	779.453	789.96	643.79	602.444	506.778	562.336	1.14683	0.7	0.870445	0.827381	0.1	0.178349
E9QMC1	Cgn	E9QMC1	8233.65	7542.62	7417.71	9985.4	10000.1	9466.61	8938.63	9979.01	9826.44	1.32386	0.1	0.408745	1.30279	0.1	0.178349
P59242-2	Cgn	CING	66.3715	72.6376	75.5462	509.611	495.517	76.6301	91.9396	96.3889	77.808	6.82177	0.1	0.408745	1.26573	0.1	0.178349
B2RSU6	Cgnl1	B2RSU6	2499.19	2060.64	2198.45	2733.9	2389.09	2314.51	2268.81	2616.87	2403.05	1.08672	0.4	0.691041	1.09307	0.4	0.503145
Q8R1U2	Cgref1	CGRE1	1551.12	1204.31	1250.18	1475.36	1941.86	1205.02	988.137	1062.93	978.503	1.18012	0.7	0.870445	0.790396	0.1	0.178349
Q9CQG1	Chac2	CHAC2	985.411	795.656	795.425	1045.87	965.081	813.196	811.098	853.224	866.115	1.21294	0.4	0.691041	1.07235	0.7	0.771399
Q9QWF0	Chaf1a	CAF1A	672.923	611.833	565.642	670.353	609.471	730.053	466.408	481.087	475.171	1.09565	0.7	0.870445	0.776635	0.1	0.178349
Q9D0N7	Chaf1b	CAF1B	420.448	510.479	427.17	526.222	499.342	546.098	447.573	485.621	425.58	1.23188	0.2	0.528743	1.04776	1	1
Q8K327	Champ1	CHAP1	2073.7	1863.8	1765.61	2065.65	2093.25	1998.89	1398.75	1313.72	1412.97	1.1083	0.4	0.691041	0.750483	0.1	0.178349
Q03059	Chat	CLAT	114.665	121.79	111.796	97.0872	107.252	115.901	87.3438	72.5725	77.9188	0.935351	0.4	0.691041	0.679534	0.1	0.178349
Q7TNL9	Chchd10	Q7TNL9	229.192	190.059	212.467	213.873	215.609	211.465	142.199	90.2843	171.085	1.00662	1	1	0.669276	0.1	0.178349
Q9D1L0	Chchd2	CHCH2	1178.11	994.598	949.589	1429.01	1375.34	1148.53	1134.97	1203.59	1105.24	1.38281	0.2	0.528743	1.14113	0.4	0.503145
Q9CRB9	Chchd3	CHCH3	2469.7	2420.53	2582.05	2450.18	2620.48	2229.68	2485.14	2414.21	2659.03	0.992096	1	1	1.00625	1	1
Q8VEA4	Chchd4	MIA40	356.308	265.583	264.561	359.646	388.415	315.95	303.619	301.464	305.859	1.35418	0.2	0.528743	1.14322	0.7	0.771399
Q91VN4	Chchd6	CHCH6	1621.1	1469.59	1381.73	1417.97	1346.56	1192.08	988.731	797.724	1003.82	0.916283	0.2	0.528743	0.672794	0.1	0.178349
Q8K2Q5	Chchd7	CHCH7	360.352	307.828	261.699	345.207	466.398	406.056	245.975	209.883	274.89	1.3191	0.2	0.528743	0.799066	0.2	0.301331
P40201	Chd1	CHD1	833.634	942.212	913.105	1076.42	1048.74	968.339	1204.65	1442.67	1125.5	1.14854	0.1	0.408745	1.31929	0.1	0.178349
Q9CXF7	Chd1l	CHD1L	340.681	437.654	376.656	439.042	414.275	432.159	450.329	430.381	496.298	1.14736	0.4	0.691041	1.1956	0.2	0.301331
E9PZM4	Chd2	CHD2	758.927	995.64	825.236	865.078	907.565	818.184	1014.63	769.594	821.86	1.04828	1	1	0.995909	1	1
B1AR17	Chd3	B1AR17	112.664	112.216	102.315	120.892	116.442	119.371	110.316	97.4889	110.682	1.06376	0.1	0.408745	0.983068	0.4	0.503145
Q6PDQ2	Chd4	CHD4	8759.83	10716.3	10281.9	10225.1	9773.86	9902.71	12914.4	12472	12502	0.963121	0.7	0.870445	1.21592	0.1	0.178349
A2AJK6	Chd7	CHD7	681.853	760.268	728.771	844.807	758.636	765.757	819.024	1009.2	771.201	1.05075	0.2	0.528743	1.12384	0.1	0.178349
Q09XV5	Chd8	CHD8	2376.19	2120.88	2208.57	2732.97	2699.62	2603.9	2368.02	3170.04	2464.52	1.22234	0.1	0.408745	1.11589	0.2	0.301331
Q8BYH8	Chd9	CHD9	142.418	140.255	122.461	155.308	150.1	150.094	114.894	98.8622	119.055	1.07019	0.1	0.408745	0.819179	0.1	0.178349
Q8BJ64	Chdh	CHDH	5346.94	5201.41	5113.59	5433.71	5600.34	5268.8	5565.75	5327.57	5251.33	1.04466	0.2	0.528743	1.02425	0.4	0.503145
O35280	Chek1	CHK1	153.176	140.63	151.837	117.924	203.713	162.358	124.875	123.666	99.135	1.06929	0.7	0.870445	0.814466	0.1	0.178349
Q9Z265	Chek2	CHK2	187.829	230.887	227.492	210.37	220.153	259.072	225.9	171.979	189.108	0.96774	1	1	0.831273	0.4	0.503145
Q8CGZ0	Cherp	CHERP	5621.24	5657.25	5123.28	5976.78	5849.17	5828.51	5282.76	4518.04	4698.63	1.04055	0.1	0.408745	0.835871	0.2	0.301331
Q810L3	Chfr	CHFR	588.553	560.26	473.561	774.964	705.752	555.711	548.042	394.256	489.581	1.25969	0.4	0.691041	0.873846	0.4	0.503145
P26339	Chga	CMGA	878.869	799.81	698.762	709.721	724.507	660.762	441.152	405.107	460.626	0.887362	0.4	0.691041	0.551571	0.1	0.178349
P16014	Chgb	SCG1	7062.36	5751.98	5212.91	6300.75	5908.09	5985.32	4414.72	4108.66	4726.39	1.04057	0.7	0.870445	0.767513	0.1	0.178349
Q91XA9	Chia	CHIA	159.939	280.442	23.5048	124.843	160.808	44.637	513.686	688.477	339.508	0.780566	1	1	3.21176	0.1	0.178349
Q922Q9	Chid1	CHID1	1540.31	1839	1970.14	1794.85	1916.4	1656.88	2347.15	2536.59	2280.12	0.975992	1	1	1.27632	0.1	0.178349
O35744	Chil3	CHIL3	1879.9	1535.28	1639.09	2035.3	914.921	1200.61	392.802	458.539	470.014	0.732486	0.7	0.870445	0.279752	0.1	0.178349
O55229	Chkb	CHKB	1315.74	1547.97	1580.07	1239.4	1684.86	1360.88	1804.98	2052.54	1914.64	0.879138	1	1	1.23687	0.1	0.178349
P70232	Chl1	CHL1	3933.23	2825.98	2687.64	2321.4	2086.15	2023.16	1633.26	1452.82	1643.84	0.738204	0.1	0.408745	0.577945	0.1	0.178349
Q9QXG2	Chm	RAE1	466.261	581.217	575.959	576.228	600.572	581.26	684.987	509.322	511.265	1.0092	0.2	0.528743	0.887676	1	1
Q921W0	Chmp1a	CHM1A	1484.29	1092.16	883.271	1184.99	1465.18	1331.26	1532.57	1506.09	2241.47	1.21892	0.7	0.870445	1.40325	0.1	0.178349
Q99LU0	Chmp1b1	CH1B1	858.607	889.309	833.753	754.72	619.066	1491.44	958.054	1114.36	1074.76	0.879005	0.7	0.870445	1.25175	0.1	0.178349
Q9CQD4	Chmp1b2	CH1B2	135.209	149.784	135.95	138.623	154.927	138.572	131.929	116.774	132.462	1.01966	0.4	0.691041	0.970423	0.1	0.178349
Q9DB34	Chmp2a	CHM2A	950.151	1221.87	1516.1	1569.47	1867.09	1367.62	1919.76	2481.82	1817.81	1.28448	0.2	0.528743	1.57117	0.1	0.178349
Q8BJF9	Chmp2b	CHM2B	1445.97	1407.38	1359.5	1485.01	2056.68	1853.74	1696.53	2104.48	1817.18	1.31716	0.1	0.408745	1.29118	0.1	0.178349
Q9CQ10	Chmp3	CHMP3	507.028	811.143	812.914	687.485	773.678	947.691	1462.26	1203.96	1085.71	0.953812	1	1	1.48428	0.1	0.178349
Q9D8B3	Chmp4b	CHM4B	4930.85	3611.98	4372.9	4532.69	4784.09	4218.14	2986.45	3370.34	3454.99	1.03654	1	1	0.770733	0.1	0.178349
Q9D7F7	Chmp4c	CHM4C	2451	1969.81	2075.34	2626.76	2882.53	3227.48	1885.99	2137.51	2348.39	1.38894	0.1	0.408745	1.02996	1	1
Q9D7S9	Chmp5	CHMP5	1364.38	965.132	1092.59	1183.34	1403.64	1186.02	742.171	633.307	807.944	1.08551	0.4	0.691041	0.679277	0.1	0.178349
P0C0A3	Chmp6	CHMP6	194.492	202.945	208.017	281.989	357.823	285.985	455.942	232.416	367.226	1.40918	0.1	0.408745	1.80949	0.1	0.178349
Q8R1T1	Chmp7	CHMP7	286.742	347.506	327.181	235.338	254.602	356.213	275.317	352.913	347.245	0.778169	0.7	0.870445	1.06132	1	1
Q91V57	Chn1	CHIN	38.066	44.8321	33.4067	37.0305	32.3194	34.7053	43.3993	36.2855	34.1032	0.911714	0.4	0.691041	0.953226	1	1
Q3V2R3	Chn2	Q3V2R3	54.0128	92.6214	70.825	107.085	101.163	102.138	59.6251	50.0516	66.4243	1.44212	0.1	0.408745	0.841865	0.4	0.503145
Q9D1P4	Chordc1	CHRD1	1283.57	1530.16	1447.99	1635.16	1508.49	1314.4	1769.23	1839.59	1385.61	1.04178	0.7	0.870445	1.22185	0.4	0.503145
P61022	Chp1	CHP1	2243.97	2051.18	1998.91	2276.64	2112.39	2172.7	2008.18	1744.98	1961.6	1.05924	0.4	0.691041	0.956328	0.2	0.301331
Q9D869	Chp2	CHP2	637.633	567.7	523.921	985.341	882.578	652.564	1231.68	1479.26	1261.15	1.55466	0.1	0.408745	2.22151	0.1	0.178349
Q8C025	Chpt1	CHPT1	68.5951	80.4996	87.5878	68.5324	81.1358	74.8661	63.3637	57.9108	62.1597	0.930018	0.7	0.870445	0.772174	0.1	0.178349
Q9JKP8	Chrac1	CHRC1	189.145	188.824	157.847	191.983	212.415	185.089	169.832	134.961	153.756	1.01673	0.4	0.691041	0.814282	0.2	0.301331
Q99LL3	Chst12	CHSTC	83.8766	81.2872	83.0125	71.7962	68.5338	82.5383	60.1985	60.1994	65.952	0.864884	0.2	0.528743	0.725185	0.1	0.178349
Q80V53	Chst14	CHSTE	84.7123	85.7409	90.919	72.2203	69.8416	100.623	74.6606	43.7566	76.4454	0.842309	0.7	0.870445	0.87077	0.1	0.178349
Q9R1I1	Chst4	CHST4	1210.34	1324.26	1494.31	1539.84	1428.2	1337.37	2367.82	3181.3	2101.86	1.07849	0.4	0.691041	1.78803	0.1	0.178349
Q8BIW9	Chtf18	CTF18	19.2515	14.634	16.4432	29.465	26.535	18.6388	22.074	26.7475	23.1973	1.61374	0.2	0.528743	1.41075	0.1	0.178349
P0CG14	Chtf8	CTF8A	69.4727	79.5073	52.2097	108.389	87.0649	81.0123	32.8696	34.192	34.4043	1.25323	0.1	0.408745	0.492165	0.1	0.178349
Q9CY57	Chtop	CHTOP	505.718	409.463	563.19	551.121	784.866	669.551	614.148	585.236	656.927	1.32396	0.2	0.528743	1.21441	0.1	0.178349
Q60680	Chuk	IKKA	635.675	801.676	734.208	765.602	766.97	736.885	1007.96	860.258	976.933	1.04276	0.7	0.870445	1.33059	0.1	0.178349
Q6DG52	Churc1	CHUR	329.354	323.909	275.742	334.258	316.152	320.062	256.516	196.744	226.867	0.988123	1	1	0.700404	0.1	0.178349
Q99KN2	Ciao1	CIAO1	1425.28	1575.99	1333.21	1773.49	1508.84	1676.62	1189.35	841.445	862.777	1.17634	0.2	0.528743	0.605339	0.1	0.178349
Q8WTY4	Ciapin1	CPIN1	1559.66	1474.25	1736.23	1628.92	1621.18	2146.39	1184.73	871.786	1258.45	1.04441	0.4	0.691041	0.759608	0.1	0.178349
Q9Z0F4	Cib1	CIB1	570.465	496.001	424.294	624.429	658.4	597.044	536.609	477.329	537.103	1.25893	0.1	0.408745	1.08187	1	1
Q924A2	Cic	CIC	1920.81	1689.31	1589.52	2089.13	1978.55	1671.9	1313.39	1152.17	1346.44	1.17122	0.4	0.691041	0.777471	0.1	0.178349
O70303	Cideb	CIDEB	277.298	339.774	321.232	319.212	452.392	349.369	435.526	277.851	434.729	1.08759	0.4	0.691041	1.35332	0.4	0.503145
Q9D0V8	Cinp	CINP	340.288	376.254	372.005	374.818	411.78	383.2	431.316	337.929	368.807	1.03009	0.2	0.528743	0.991403	1	1
Q9DA19	Cir1	CIR1	492.22	494.451	459.064	485.659	535.09	581.561	477.094	502.658	424.816	1.08709	0.4	0.691041	0.96927	1	1
P60824	Cirbp	CIRBP	2262.88	1683.62	1421.99	1389.09	1754.76	2498.5	965.708	1121.52	1231.61	1.04225	1	1	0.666136	0.1	0.178349
Q8R2N2	Cirh1a	CIR1A	169.334	165.334	191.272	167.773	196.702	189.937	220.157	256.745	198.736	1.12167	0.7	0.870445	1.30014	0.1	0.178349
Q91WS0	Cisd1	CISD1	4279.33	5014.1	5798.08	4143.35	5048.06	4671.98	5919.72	5977.27	5876.65	0.931768	0.7	0.870445	1.18061	0.1	0.178349
Q9CQB5	Cisd2	CISD2	406.746	496.017	461.481	468.341	418.882	409.372	478.044	462.99	516.482	0.907691	1	1	1.03589	0.4	0.503145
B1AR13	Cisd3	CISD3	1789.6	1808.26	1602.33	2095.84	1981.81	1730.09	2259.38	1915.41	2249.75	1.1074	0.4	0.691041	1.25712	0.1	0.178349
P49025	Cit	CTRO	278.06	397.019	361.676	397.623	448.396	412.569	507.307	519.462	506.096	1.14071	0.1	0.408745	1.40266	0.1	0.178349
A2AN61	Ciz1	A2AN61	151.93	150.445	157.584	192.129	167.786	159.584	154.978	135.858	150.019	1.10436	0.1	0.408745	0.987422	0.4	0.503145
Q8BMK4	Ckap4	CKAP4	8311.77	9019.08	9353.99	7794.55	7414.6	7627.04	7950.81	10245.3	8731.17	0.845656	0.1	0.408745	0.968078	1	1
A2AGT5	Ckap5	CKAP5	5561.85	7129.22	7543.1	6445.08	6650.03	6809.47	9894.82	9855.48	9718.81	0.932785	0.7	0.870445	1.38241	0.1	0.178349
Q04447	Ckb	KCRB	16647.5	15992.8	15830.8	11515.4	13727.2	14356.5	10470.9	8123.54	10506.7	0.858336	0.1	0.408745	0.654726	0.1	0.178349
P07310	Ckm	KCRM	8450.19	8036.92	7764.48	6422.99	6119.94	6079.34	4379.47	3967.53	4753.72	0.761478	0.1	0.408745	0.544919	0.1	0.178349
P30275	Ckmt1	KCRU	12214.9	12698.6	12431.2	12912.2	13762.4	14570.9	13398	13757.8	14806	1.10709	0.1	0.408745	1.10671	0.1	0.178349
Q6P8J7	Ckmt2	KCRS	1319.57	1406.63	1334.09	1421.19	1586.93	1438.46	1818.11	1717.85	1948.24	1.07823	0.1	0.408745	1.36281	0.1	0.178349
P61025	Cks1b	CKS1	52.6009	44.3212	35.3356	60.9077	56.0575	57.0987	33.7432	44.0299	51.2084	1.28829	0.1	0.408745	0.993428	0.7	0.771399
P56390	Cks2	CKS2	729.659	655.195	587.399	787.898	880.932	737.48	518.543	550.486	543.753	1.20254	0.1	0.408745	0.82991	0.1	0.178349
Q80TV8	Clasp1	CLAP1	1896.28	2160.86	2017.9	1771.76	1865.52	1914.27	2039.4	1682.09	2104.15	0.924486	0.2	0.528743	1.01066	1	1
Q8BRT1	Clasp2	CLAP2	1580.67	1739.79	1795.37	1586.99	1717.27	1736.23	1803.11	1520.25	1677.99	0.987056	0.7	0.870445	0.964478	1	1
Q8BRT1-5	Clasp2	CLAP2	723.469	908.999	885.646	767.819	854.24	905.265	896.066	632.216	1057.27	0.964539	1	1	1.01177	1	1
Q8CFC7	Clasrp	CLASR	524.898	501.736	504.328	521.313	508.985	536.583	400.193	290.919	449.113	1.03368	0.4	0.691041	0.793517	0.1	0.178349
Q9D7Z6	Clca1	CLCA1	18680.3	19055.9	17980.1	20394.8	16277.8	13097.7	28733.3	37543.4	38712	0.871389	0.7	0.870445	2.00979	0.1	0.178349
E9PUL3	Clca4	E9PUL3	4221.06	5580.25	5198.71	6896.9	6530.28	5656.04	8190.4	8210.2	9382.17	1.25614	0.1	0.408745	1.57928	0.1	0.178349
G3X8Z1	Clca6	G3X8Z1	2929.27	2456.71	2368.35	5451.46	5834.76	4950	7764.71	9469.81	8515.97	2.21901	0.1	0.408745	3.46641	0.1	0.178349
Q99LI2	Clcc1	CLCC1	1589.7	1979.62	2143.94	1486	1680.93	2074.85	1659.41	1248.91	1775.59	0.849118	0.7	0.870445	0.838247	0.4	0.503145
Q9R0A1	Clcn2	CLCN2	929.396	962.186	1072.58	1323.67	1206.14	1103.14	1522.12	1602.34	1347.72	1.25354	0.1	0.408745	1.58194	0.1	0.178349
E9Q2I1	Clcn3	E9Q2I1	15.5516	21.4797	22.1098	21.5157	24.6353	24.643	26.2103	32.2715	25.8762	1.14691	0.2	0.528743	1.22024	0.1	0.178349
Q61418	Clcn4	CLCN4	271.979	316.922	302.661	291.565	316.251	344.112	349.314	343.556	349.492	1.0449	0.7	0.870445	1.15414	0.1	0.178349
O70496	Clcn7	CLCN7	231.118	283.817	276.913	196.444	220.428	239.87	247.86	239.617	237.726	0.796019	0.2	0.528743	0.865315	0.7	0.771399
Q9Z0S5	Cldn15	CLD15	252.683	370.6	319.97	220.671	284.491	269.209	207.482	88.1642	189.794	0.841357	0.4	0.691041	0.593162	0.1	0.178349
O88552	Cldn2	CLD2	31.466	30.0457	34.8432	16.7859	19.939	41.4958	12.2575	1.06649	11.4228	0.633668	0.7	0.870445	0.36302	0.1	0.178349
Q9D7D7	Cldn23	CLD23	245.561	256.166	228.088	287.069	349.806	300.796	309.625	293.041	315.476	1.22493	0.1	0.408745	1.26089	0.1	0.178349
Q9Z0G9	Cldn3	CLD3	230.927	283.094	250.843	315.38	317.828	294.555	471.625	323.32	397.372	1.25728	0.1	0.408745	1.58415	0.1	0.178349
O35054	Cldn4	CLD4	12.5807	14.5145	8.70125	14.2648	23.9664	19.4927	41.4456	42.4135	49.4116	1.54941	0.2	0.528743	3.37132	0.1	0.178349
Q9Z261	Cldn7	CLD7	127.822	174.264	171.965	166.025	182.115	203.712	298.105	165.464	226.905	1.05902	0.4	0.691041	1.31948	0.4	0.503145
Q9CQX5	Cldnd1	CLDN1	1010.02	996.629	1052.62	880.555	1045.57	995.047	901.985	723.469	929.326	0.985176	0.4	0.691041	0.893037	0.1	0.178349
P49300	Clec10a	CLC10	519.8	406.858	381.338	499.832	307.067	315.625	452.935	356.869	478.535	0.775762	0.4	0.691041	1.11325	1	1
Q80U30	Clec16a	CL16A	755.962	618.403	817.867	698.707	917.729	678.965	773.929	957.289	866.878	0.924262	1	1	1.14672	0.2	0.301331
Q91V08	Clec2d	CLC2D	706.567	766.251	795.705	665.68	672.957	778.766	643.923	434.249	600.574	0.878246	0.4	0.691041	0.783782	0.1	0.178349
P43025	Clec3b	TETN	2566.97	1751.39	2075.51	1741.28	1989.05	1930.21	908.221	965.408	945.039	0.929993	0.4	0.691041	0.455329	0.1	0.178349
Q8JZX6	Clec4a3	Q8JZX6	135.646	137.566	122.432	122.707	94.4653	106.152	82.9256	60.2359	78.5734	0.782566	0.2	0.528743	0.579253	0.1	0.178349
Q9JKF4	Clec6a	CLC6A	20.1325	25.4131	23.2047	23.8197	25.3857	25.7417	16.1622	13.576	20.5911	1.09399	0.4	0.691041	0.696505	0.2	0.301331
Q9Z1Q5	Clic1	CLIC1	6300.95	5284.96	5344.54	6487.73	5814.64	5241.76	6331.1	5647.25	5622.5	1.08796	1	1	1.05664	0.4	0.503145
Q9QYB1	Clic4	CLIC4	4642.21	4322.34	4272.15	3912.28	3572.58	3844.86	3209.89	3033.81	3214.64	0.889532	0.1	0.408745	0.742628	0.1	0.178349
Q8BXK9	Clic5	CLIC5	4517.97	3681.84	4126.04	4110.59	3952.2	4516.8	3146.77	3514.04	3237.61	0.996255	1	1	0.784677	0.1	0.178349
Q8BHB9	Clic6	CLIC6	2846.04	2184.82	2202.97	3045.04	2820.12	2556.75	1607.26	1845.69	1698.17	1.28015	0.4	0.691041	0.770855	0.1	0.178349
Q5SUH6	Clint1	Q5SUH6	7658.56	7677.68	6702.54	7797.36	9249.43	8977.37	6741.13	5818.9	7049.59	1.1722	0.1	0.408745	0.880209	0.4	0.503145
Q922J3	Clip1	CLIP1	10185.3	9168.59	9871.02	10110.2	9287.43	8428.39	8183.56	8494.92	8444.65	0.940878	0.7	0.870445	0.855499	0.1	0.178349
Q9Z0H8	Clip2	CLIP2	54.3619	54.4084	37.9943	48.0326	46.3391	43.6043	39.7783	23.8618	28.6217	0.852419	0.7	0.870445	0.526503	0.2	0.301331
Q9Z0H8-2	Clip2	CLIP2	9693.25	9644.33	9826.93	11084.2	10056.5	8830.77	10099.6	9764.66	9628.08	1.03747	0.7	0.870445	1.00737	1	1
B9EHT4	Clip3	CLIP3	50.1411	52.7279	35.3352	45.2031	42.1078	44.0325	37.0284	34.6038	27.6455	0.878172	0.7	0.870445	0.690128	0.2	0.301331
O35492	Clk3	CLK3	731.262	908.121	827.937	993.043	1045.48	1051.6	1231.93	1634.71	1144.85	1.26275	0.1	0.408745	1.48795	0.1	0.178349
Q8C5W0	Clmn	CLMN	5889.51	5574.04	5332.02	6601.94	6171.04	6466.24	5874.41	6282.32	6257.61	1.16006	0.1	0.408745	1.12264	0.2	0.301331
Q8R373	Clmp	CLMP	30.4542	33.0424	28.4263	27.98	26.6372	36.1643	28.343	21.1599	28.3827	0.918757	0.7	0.870445	0.930676	0.1	0.178349
Q61124	Cln3	CLN3	130.468	157.723	136.763	107.68	119.015	145.889	127.774	70.6387	112.526	0.870228	0.4	0.691041	0.822781	0.1	0.178349
Q3UMW8	Cln5	CLN5	329.207	372.187	366.822	303.561	396.532	337.643	397.292	334.667	388.823	0.920455	1	1	1.05998	0.4	0.503145
D6RE34	Cln6	D6RE34	26.8426	27.9178	36.6737	34.1018	28.7794	31.0597	17.0914	40.6981	23.9635	1.11254	0.7	0.870445	0.858359	0.7	0.771399
Q61189	Clns1a	ICLN	2438.33	2055.46	2344.87	2454.71	2445.8	2018.54	2044.24	1900.43	1984.96	1.04304	0.7	0.870445	0.846512	0.1	0.178349
O08785	Clock	CLOCK	554.641	465.032	439.244	419.685	416.677	377.93	337.051	356.314	354.922	0.896018	0.1	0.408745	0.763221	0.1	0.178349
Q99LI9	Clp1	CLP1	158.04	200.636	188.197	190.211	198.901	222.317	271.446	259.071	232.579	1.05688	0.4	0.691041	1.3766	0.1	0.178349
Q60649	Clpb	CLPB	2341.34	2969.22	2736.4	2722.93	3042.76	2859.25	3578.04	3308.71	3463.27	1.04489	0.7	0.870445	1.26563	0.1	0.178349
O88696	Clpp	CLPP	3552.79	3078.27	2919.82	3144.22	3015.35	2997.34	2467.86	2059.63	2394.23	0.97956	1	1	0.777784	0.1	0.178349
Q8VBZ3	Clptm1	CLPT1	1611.68	1985.53	1978.44	1458.72	1836.86	2202.15	1407.71	976.105	1485.1	0.928439	1	1	0.711525	0.1	0.178349
Q8BXA5	Clptm1l	CLP1L	677.56	858.032	840.671	626.907	786.896	856.731	660.564	354.727	635.236	0.936033	0.7	0.870445	0.75563	0.1	0.178349
Q9JHS4	Clpx	CLPX	3631.79	3712.27	3713.51	4412.28	4311.7	3778.93	4681.23	5121.69	4789.55	1.16147	0.1	0.408745	1.29019	0.1	0.178349
Q8BHH8	Clrn3	CLRN3	135.944	130.477	166.299	139.237	192.092	169.315	290.259	166.909	222.507	1.24548	0.2	0.528743	1.63675	0.1	0.178349
Q80YR7	Clspn	CLSPN	35.0164	38.1528	35.6179	38.818	31.3003	38.4628	27.7938	27.3968	25.9506	1.07987	0.7	0.870445	0.769186	0.1	0.178349
Q9EPL2	Clstn1	CSTN1	558.588	531.009	585.186	714.018	726.99	553.467	829.556	645.944	868.529	1.27825	0.4	0.691041	1.4851	0.1	0.178349
B1AWE0	Clta	B1AWE0	3036.88	2463.74	2533.61	2563.71	2754.34	2335.48	2016.52	1912.61	2052.94	1.01188	1	1	0.795908	0.1	0.178349
Q6IRU5	Cltb	CLCB	1971.95	1542.98	1634.21	1629.51	1748.35	1910.44	1296.27	1380.28	1364.78	1.06984	1	1	0.835131	0.1	0.178349
Q6IRU5-2	Cltb	CLCB	80.0062	63.9033	48.0097	45.6059	39.9232	131.493	39.8676	39.4542	52.0646	0.71367	0.7	0.870445	0.623874	0.2	0.301331
Q68FD5	Cltc	CLH1	19127.4	23481.1	25062.6	20037.4	23695.1	25360.9	34008.2	32173.7	27210.2	1.00911	0.7	0.870445	1.3702	0.1	0.178349
Q06890	Clu	CLUS	2799.53	1971.5	1744.46	1591.17	1685.92	1581.39	1233.2	1416.88	1634.38	0.807086	0.1	0.408745	0.718681	0.1	0.178349
Q8R3P7	Cluap1	CLUA1	42.2324	56.1151	40.3897	38.9445	46.2103	46.0957	39.8269	46.5105	33.6137	1.09148	1	1	0.943041	0.4	0.503145
Q5SW19	Cluh	CLU	4425.57	5851.47	5555.5	5948.8	6010.52	6879.33	7295.7	6599.86	6763.39	1.0819	0.1	0.408745	1.21742	0.1	0.178349
Z4YLI8	Cluh	Z4YLI8	105.107	100.287	88.4507	136.929	111.424	118.926	83.7295	52.2721	72.8976	1.18586	0.1	0.408745	0.72689	0.1	0.178349
Q8R4N0	Clybl	CLYBL	6300.24	5884.36	5635.54	6098.69	5576.51	5151.35	5072.14	4017.23	5026.71	0.947683	0.4	0.691041	0.854249	0.1	0.178349
P21844	Cma1	CMA1	94.1688	82.6429	96.6368	98.8706	134.673	82.0714	154.389	167.721	151.812	1.04993	0.7	0.870445	1.63949	0.1	0.178349
Q61419	Cmah	CMAH	116.702	184.054	167.326	148.708	125.48	100.231	77.4067	84.2484	96.5663	0.749913	0.4	0.691041	0.503499	0.1	0.178349
Q99KK2	Cmas	NEUA	3215.85	4256.13	4589.86	4787.24	5415.49	4479.35	9188.77	10256	6983.43	1.12479	0.2	0.528743	2.15895	0.1	0.178349
Q8R1G2	Cmbl	CMBL	1304.45	1257.21	1211.16	1534.09	2490.72	2032.34	1821.96	1958.7	1895.46	1.61655	0.1	0.408745	1.50767	0.1	0.178349
Q8K199	Cmc2	COXM2	98.6201	84.0958	70.3037	80.9458	86.1764	77.6358	73.6545	73.4494	66.7431	0.962543	1	1	0.873402	0.4	0.503145
Q9D486	Cmip	CMIP	183.783	255.667	207.523	301.086	225.576	198.441	402.037	417.947	395.82	1.08699	0.7	0.870445	1.93731	0.1	0.178349
Q9DBP5	Cmpk1	KCY	11355.8	10417.4	10470.1	11973.7	12050.6	10616.6	12310.9	13150.8	13356.5	1.14361	0.2	0.528743	1.25603	0.1	0.178349
Q3U5Q7	Cmpk2	CMPK2	3826.42	3488.56	3740.03	3545.37	3362.54	3544.53	3403.85	1958.99	2641.8	0.947728	0.4	0.691041	0.706358	0.1	0.178349
Q9CZT6	Cmss1	CMS1	272.209	349.076	307.285	314.132	300.299	343.282	228.591	216.369	315.683	1.02228	1	1	0.743905	0.4	0.503145
Q9DBC3	Cmtr1	CMTR1	1645.93	2065.33	1888.13	1997.82	1772.98	1967.82	2086.26	1976.05	2020.07	1.04221	1	1	1.06988	0.4	0.503145
P53996-2	Cnbp	CNBP	1471.77	1202	943.189	1161.98	1148.11	1769.81	506.024	559.607	560.158	0.966705	1	1	0.465563	0.1	0.178349
P53996	Cnbp	CNBP	68.3496	48.1579	31.7408	50.1729	57.4014	73.7035	14.5679	21.3768	25.4127	1.19194	0.4	0.691041	0.44389	0.1	0.178349
Q9D1A2	Cndp2	CNDP2	10596.9	9666.44	9633.52	10596.7	10101.3	8916.07	9483.94	9124.03	9819.23	1.04499	1	1	0.98112	0.4	0.503145
Q9CX13	Cnih4	CNIH4	365.583	377.966	392.231	393.916	304.399	463.444	458.818	280.679	461.396	1.0422	0.7	0.870445	1.21391	0.7	0.771399
A2A9K7	Cnksr1	A2A9K7	286.794	278.68	230.978	355.596	383.351	353.259	375.622	292.588	304.273	1.276	0.1	0.408745	1.09184	0.1	0.178349
Q8BMA3	Cnksr3	CNKR3	894.73	891.02	885.371	978.682	1040.45	1028	1127.94	1006.29	1067.92	1.15373	0.1	0.408745	1.19854	0.1	0.178349
Q08091	Cnn1	CNN1	24446.9	21898.4	23497.3	23012.7	18994.7	15755.5	14582	16740.2	15685	0.808378	0.2	0.528743	0.667524	0.1	0.178349
Q08093	Cnn2	CNN2	6060.68	4752.05	5456.35	4429.92	3874.28	5857.92	3547.91	4434.49	3943.99	0.811883	0.4	0.691041	0.722826	0.1	0.178349
Q9DAW9	Cnn3	CNN3	5773.56	5186.94	5369.77	4969.55	3681.55	4320.72	2668.41	2831.01	2715.28	0.804638	0.1	0.408745	0.50566	0.1	0.178349
Q32NY4	Cnnm3	CNNM3	689.075	682.246	671.692	644.636	582.705	642.481	594.836	631.728	602.452	0.941715	0.1	0.408745	0.883042	0.1	0.178349
Q69ZF7	Cnnm4	CNNM4	4943.08	5841.96	6173.48	5809.07	6110.41	6995.68	7664.2	5653.56	6774.17	1.04595	0.7	0.870445	1.15957	0.4	0.503145
Q6ZQ08	Cnot1	CNOT1	5934.54	6947.09	7195.63	6627.32	6411.01	7031.73	8388.39	7935.13	7863.25	0.953971	1	1	1.14222	0.1	0.178349
Q8BH15	Cnot10	CNO10	1579.7	1898.11	1866.4	1470.98	1652.76	1886.93	2070.72	1855.04	1887.48	0.885534	0.7	0.870445	1.01129	0.7	0.771399
Q9CWN7	Cnot11	CNO11	107.164	123.339	113.638	116.746	129.858	128.83	113.86	107.665	101.288	1.13369	0.2	0.528743	0.947438	0.7	0.771399
Q8C5L3	Cnot2	CNOT2	1173.54	1078.9	1083.28	1221.47	1469.23	1353.44	914.069	1211.21	996.164	1.24939	0.1	0.408745	0.919581	0.7	0.771399
Q8K0V4	Cnot3	CNOT3	2023.13	1979.87	1930.77	1984.66	2311.02	2200.73	1643.57	1739.1	1717.71	1.11155	0.2	0.528743	0.867587	0.1	0.178349
Q8BT14	Cnot4	CNOT4	831.419	883.03	756.769	960.16	915.175	860.187	719.285	520.041	747.953	1.10074	0.2	0.528743	0.865129	0.1	0.178349
Q8VEG6	Cnot6l	CNO6L	1116.5	1278.76	1153.52	1398.35	1290.81	1236.41	1561.24	1809.25	1405.26	1.11902	0.2	0.528743	1.35346	0.1	0.178349
Q60809	Cnot7	CNOT7	696.916	787.397	784.48	721.95	897.886	914.53	802.152	623.731	795.604	1.14456	0.4	0.691041	1.01418	0.7	0.771399
Q9D8X5	Cnot8	CNOT8	648.562	755.23	619.25	664.113	813.383	735.986	630.727	577.815	624.161	1.1348	0.4	0.691041	0.962377	0.4	0.503145
P16330	Cnp	CN37	2619.14	3032.14	3213.48	2715.17	2485.28	2766.49	2940.69	3467.64	2934.6	0.895463	0.4	0.691041	0.96984	1	1
Q9QXT0	Cnpy2	CNPY2	2557.02	2135.61	2299.71	2228.19	2130.13	2095.57	2038.46	2138.9	2203.25	0.92626	0.2	0.528743	0.930074	0.4	0.503145
Q9DAU1	Cnpy3	CNPY3	2703.35	2568.51	2764.28	2259.12	2634.7	2383.09	2036.91	1809.78	1709.36	0.881532	0.2	0.528743	0.669458	0.1	0.178349
Q8BQ47	Cnpy4	CNPY4	2413.11	2007.86	2096.34	2123.88	1825.96	2205.86	1567.85	1907.58	1823.12	1.01314	1	1	0.869668	0.1	0.178349
Q5M8N0	Cnrip1	CNRP1	2652.57	2131.38	2032.77	2011.14	1901.16	1807.31	1396.37	1335.61	1578.73	0.891985	0.1	0.408745	0.655148	0.1	0.178349
Q8CBC4	Cnst	CNST	1021.07	934.001	908.634	980.545	937.947	913.848	738.286	663.624	772.523	1.00422	1	1	0.790455	0.1	0.178349
P12960	Cntn1	CNTN1	1869.82	1615.29	1385.03	1256.65	1234.58	1339.44	966.679	913.017	1031.63	0.777972	0.1	0.408745	0.598455	0.1	0.178349
A2AL36	Cntrl	CNTRL	1163.04	1114.78	1033.99	1296.9	1104.96	962.979	1103.98	982.764	1130.91	0.991191	1	1	0.990312	0.7	0.771399
Q8CB62	Cntrob	CNTRB	208.446	180.181	166.483	218.495	226.071	196.783	172.528	174.02	184.611	1.21264	0.2	0.528743	0.965807	1	1
Q9D2R6	Coa3	COA3	958.075	982.547	1072.2	1085.13	1155.7	1002.17	989.599	895.977	946.866	1.10441	0.2	0.528743	0.963685	0.4	0.503145
Q99M07	Coa5	COA5	34.7913	35.6067	33.9778	41.4049	36.8286	43.7108	43.4773	25.053	26.4769	1.19009	0.1	0.408745	0.761021	0.7	0.771399
Q8BGD8	Coa6	COA6	89.8238	70.6689	74.9283	87.0178	96.1017	66.9699	70.4538	77.6343	77.0867	1.16135	1	1	1.02881	1	1
Q921H9	Coa7	COA7	1107.8	847.629	985.604	1058.06	984.817	869.049	859.307	925.436	878.403	0.999202	1	1	0.891233	0.7	0.771399
Q9DBL7	Coasy	COASY	2685.06	3101.09	3354.44	2492.75	2491.38	3424.08	3817.17	4051.53	4022.75	0.80383	0.7	0.870445	1.2972	0.1	0.178349
Q5NBX1	Cobl	COBL	1141.93	1119.82	1073.45	1661.18	1593.68	1370.36	1694.89	1711.67	1925.86	1.42316	0.1	0.408745	1.52852	0.1	0.178349
Q3UMF0-3	Cobll1	COBL1	9038.24	8146.56	7875.59	9640.15	10549.3	10183.3	6653.49	5849.95	6787.57	1.25001	0.1	0.408745	0.816724	0.1	0.178349
Q9Z160	Cog1	COG1	1955.39	2351.76	2539.2	2197.68	2434.8	2238.6	2975.56	2836.09	2905.05	0.951883	1	1	1.23527	0.1	0.178349
Q921L5	Cog2	COG2	2291.13	2714.33	2942.75	2710.87	2649.19	2612.11	4005.04	3879.3	3468.18	0.976001	0.7	0.870445	1.42919	0.1	0.178349
Q8CI04	Cog3	COG3	4556.58	5345.55	5719.24	4450.4	5133.44	5391.12	5360.97	4197.01	5235.89	0.96032	0.7	0.870445	0.979486	0.7	0.771399
Q8R1U1	Cog4	COG4	1897.62	2283.67	2352.77	2006.3	2282.22	2248.05	3023.72	2386.6	2463.22	0.984402	0.7	0.870445	1.07862	0.1	0.178349
Q8C0L8	Cog5	COG5	1368.4	1881.87	1856.7	1549.72	1710.61	1745.21	2440.06	2121.55	2221.4	0.921317	0.7	0.870445	1.19642	0.1	0.178349
Q8R3I3	Cog6	COG6	2856.78	3608.81	3953.21	2985.62	3570.31	3521.07	4365.17	4516.87	4446.61	0.975687	0.7	0.870445	1.23215	0.1	0.178349
Q3UM29	Cog7	COG7	3768.17	4734.59	5007.17	4015.13	4371.26	4675.08	5743.05	5367.91	5493.67	0.923261	0.7	0.870445	1.16033	0.1	0.178349
Q9JJA2	Cog8	COG8	394.308	410.871	414.458	362.017	403.652	386.047	516.283	371.221	448.672	0.939582	0.2	0.528743	1.092	0.7	0.771399
Q5SU73	Coil	COIL	457.867	446.35	418.581	457.605	482.624	423.012	389.56	405.514	430.54	1.02522	0.7	0.870445	0.908511	0.2	0.301331
Q60847	Col12a1	COCA1	19476.9	20027.1	20664.7	17469.7	15884.3	18972.5	20010.1	22808.1	23692.4	0.872303	0.1	0.408745	1.13886	0.4	0.503145
B7ZNH7	Col14a1	B7ZNH7	13841.5	8174.1	8734.09	7924.12	6352.42	10420.7	6559.73	6979.43	9613.43	0.907263	0.4	0.691041	0.799102	0.4	0.503145
O35206	Col15a1	COFA1	2954.49	3089.61	2713.56	3131.97	2777.68	2869.55	3023.28	3261.42	3195.56	0.971251	1	1	1.08159	0.2	0.301331
P39061	Col18a1	COIA1	3239.51	3392.12	3368.76	2639.09	2859.15	2899.07	2982.3	3038.07	2754.7	0.848725	0.1	0.408745	0.885281	0.1	0.178349
P11087	Col1a1	CO1A1	3151.28	2724.26	2790.61	2679.61	3013.57	3057.69	2442.38	2388.6	6850.55	1.0799	1	1	0.875214	0.7	0.771399
Q01149	Col1a2	CO1A2	1417.64	1166.27	1173.83	1209.89	1202.38	1229.6	903.068	870.007	1641.82	1.03072	0.7	0.870445	0.769335	0.7	0.771399
P08121	Col3a1	CO3A1	2539.66	2270.81	2283.21	2563.47	2246.52	2773.46	1712.5	1881.53	1864.37	1.12275	0.7	0.870445	0.816557	0.1	0.178349
P02463	Col4a1	CO4A1	90.7989	95.7678	86.5071	98.2701	80.4213	242.601	95.8298	99.9349	120.45	1.08228	0.7	0.870445	1.10062	0.1	0.178349
P08122	Col4a2	CO4A2	953.786	803.64	839.254	915.122	752.659	758.099	702.56	738.515	869.392	0.903301	0.4	0.691041	0.879966	0.4	0.503145
Q9EQG9	Col4a3bp	C43BP	3440.51	3673.96	3613.34	3570.68	3533.66	3725.58	3864.67	3506.94	3492.23	0.988194	1	1	0.970554	1	1
O88207	Col5a1	CO5A1	1006.73	862.977	854.585	1015.23	860.113	927.276	736.101	698.104	942.315	1.07451	0.7	0.870445	0.852979	0.4	0.503145
Q3U962	Col5a2	CO5A2	198.914	190.085	188.352	209.987	159.176	187.364	143.246	126.488	147.243	0.985685	0.7	0.870445	0.753589	0.1	0.178349
Q9JLI2	Col5a3	Q9JLI2	574.549	751.957	689.089	540.054	794.011	729.244	685.956	712.242	1414.59	1.05827	1	1	1.0336	0.7	0.771399
Q04857	Col6a1	CO6A1	17220.1	14175.6	13621	9732.5	8553.23	10251	9071.82	7681.7	12553.6	0.686567	0.1	0.408745	0.63996	0.1	0.178349
Q02788	Col6a2	CO6A2	14882.8	12991.7	11917.6	8704.59	7515.25	10933.2	8021.73	6992.05	12971.4	0.670012	0.1	0.408745	0.61745	0.2	0.301331
E9PWQ3	Col6a3	E9PWQ3	53534.3	49439	47718.2	35953.5	27220.8	34488.4	36966.2	42641.4	52535.6	0.697595	0.1	0.408745	0.862505	0.4	0.503145
A2AX52	Col6a4	CO6A4	5762.09	6928.65	4728.85	5307.85	5420.69	6594.22	7234.17	8146.73	7268.5	0.940751	1	1	1.26144	0.1	0.178349
A6H584	Col6a5	CO6A5	1826.37	2325.98	1628.28	1306.33	1156.86	1099.11	1289.45	1349.22	1794.07	0.63342	0.1	0.408745	0.738744	0.2	0.301331
Q00780	Col8a1	CO8A1	83.3092	62.4447	52.8099	60.9793	69.3236	66.3423	61.8545	60.6982	62.1895	1.06242	1	1	0.990548	0.7	0.771399
Q8K4Q8	Colec12	COL12	650.252	577.299	603.107	549.223	461.365	581.404	403.352	392.75	472.573	0.910656	0.2	0.528743	0.66879	0.1	0.178349
Q8K297	Colgalt1	GT251	1215.34	1396	1175.45	1571.93	1326.27	1304.71	1378.23	1720.77	1273.34	1.09127	0.4	0.691041	1.13403	0.4	0.503145
Q8K4M5	Commd1	COMD1	331.411	483.465	402.992	501.414	426.783	393.539	633.232	562.42	622.811	1.05904	0.7	0.870445	1.54547	0.1	0.178349
Q8JZY2	Commd10	COMDA	2089.61	2377.38	2165.43	2061.33	1977.83	1988.46	2049.59	1695.58	1964.06	0.918275	0.1	0.408745	0.907007	0.1	0.178349
Q8BXC6	Commd2	COMD2	355.478	426.199	389.391	453.224	444.612	380.841	519.24	491.73	495.617	1.14181	0.4	0.691041	1.2728	0.1	0.178349
Q63829	Commd3	COMD3	3049.41	2238.37	2580.77	2593.91	2571.16	2279.31	2122.81	2545.02	2255.56	0.996276	1	1	0.873987	0.4	0.503145
Q9CQ02	Commd4	COMD4	305.761	353.498	372.784	385.262	332.662	302.458	449.459	392.934	401.266	0.941058	1	1	1.13513	0.1	0.178349
Q8R395	Commd5	COMD5	1176.65	1327.78	1137.39	1428.08	1142.42	1043.05	1716.01	2134.97	1644.01	0.970909	1	1	1.45839	0.1	0.178349
Q3V4B5	Commd6	COMD6	1700.71	1399.22	1407.03	1607.01	1585.77	1287.72	1216.27	1104.61	1205.94	1.12703	1	1	0.857082	0.1	0.178349
Q8BG94	Commd7	COMD7	397.364	494.334	463.395	453.08	476.85	481.168	519.571	328.508	502.962	1.02904	1	1	1.08539	0.7	0.771399
Q9CZG3	Commd8	COMD8	3772.5	3105.49	3020.78	3468.07	3482.32	3175.11	2770.67	2723.43	2780.76	1.11675	0.7	0.870445	0.892184	0.1	0.178349
Q8K2Q0	Commd9	COMD9	1300.32	1061.13	1127.93	1183.72	1205.55	1213.71	987.812	907.582	912.153	1.06882	0.7	0.870445	0.808696	0.1	0.178349
O88587	Comt	COMT	3577.56	3278.49	3405.16	3067.13	2881.18	2870.89	2736.69	2662.63	2601.73	0.846122	0.1	0.408745	0.78194	0.1	0.178349
Q8BIG7	Comtd1	CMTD1	350.591	290.676	298.794	266.042	284.117	284.1	289.973	135.41	199.773	0.950822	0.1	0.408745	0.668598	0.1	0.178349
Q8CIE6	Copa	COPA	13380.7	17929.3	19466.9	13437.1	15779.5	16918.7	19247.4	19053.5	18188.2	0.880096	0.7	0.870445	1.0627	0.7	0.771399
Q9JIF7	Copb1	COPB	7294.87	8299.5	8973.77	6873.09	7132.16	9564.59	8018.83	7164.99	7986.55	0.859348	0.7	0.870445	0.962293	0.4	0.503145
O55029	Copb2	COPB2	8297.6	10668	11833.2	8513.36	10088.1	11692.6	12273.1	12694.2	12140.9	0.945641	1	1	1.15046	0.1	0.178349
O89079	Cope	COPE	2776.52	2512.57	2526.93	2676.05	2399.07	2403.32	2299.6	2351.18	2280.05	0.951083	0.4	0.691041	0.910037	0.1	0.178349
Q9QZE5	Copg1	COPG1	4938.91	6126.15	6793.36	5382.35	6046.29	6456.08	7929.97	6440.08	5925.36	0.986964	1	1	1.05124	0.7	0.771399
Q9QXK3	Copg2	COPG2	3201.41	4493.39	4510.27	3675.03	4577.93	4795.31	5410.41	4437.78	5448.81	1.01881	0.4	0.691041	1.20408	0.4	0.503145
P61202	Cops2	CSN2	2650.04	3332.91	3285.51	2637.49	3362.14	3351.15	3370.86	3413.59	3446.06	1.01998	0.7	0.870445	1.03898	0.1	0.178349
O88543	Cops3	CSN3	1728.83	2102.92	2427.85	1556.93	1707.47	2084.92	1982.94	1311.36	1985.22	0.811952	0.2	0.528743	0.942946	0.4	0.503145
O88544	Cops4	CSN4	5510.62	6482.33	6953.6	5664.59	6260.26	6433.67	7839.04	7444.38	7060.04	0.965742	0.7	0.870445	1.14841	0.1	0.178349
O35864	Cops5	CSN5	2943.32	3856.35	3629.6	3275.63	3955.37	3653.35	5302	4456.07	4325.39	1.00654	0.7	0.870445	1.2277	0.1	0.178349
O88545	Cops6	CSN6	1944.98	2172.23	2374.67	2302.05	2497.85	2184.5	3281.96	3126.49	2273.09	1.05976	0.4	0.691041	1.4393	0.2	0.301331
Q9CZ04	Cops7a	CSN7A	1489.53	1489.18	1428.78	1349.45	1257.35	1506	1425.64	1544.59	1498.14	0.90617	0.7	0.870445	1.00602	0.7	0.771399
Q8BV13	Cops7b	CSN7B	808.824	808.396	777.758	720.011	783.454	692.595	733.014	694.23	720.304	0.890666	0.2	0.528743	0.891029	0.1	0.178349
Q8VBV7	Cops8	CSN8	1563.27	1286.51	1249.35	1424.66	1351.59	1298.73	903.573	778.764	982.659	1.05059	0.7	0.870445	0.702344	0.1	0.178349
P61924	Copz1	COPZ1	1391.96	1411.01	1513.54	1390.4	1401.95	1405.79	1237.5	1125.8	1261.04	0.993579	0.4	0.691041	0.877031	0.1	0.178349
Q9JHH9	Copz2	COPZ2	783.042	853.067	955.422	744.556	844.567	820.967	691.165	620.527	691.905	0.962371	0.4	0.691041	0.810212	0.1	0.178349
E9Q3H6	Coq10a	E9Q3H6	71.9532	85.922	84.7123	67.108	80.1847	89.8934	74.0544	52.2322	66.6969	0.946553	1	1	0.787334	0.2	0.301331
Q8BMS4	Coq3	COQ3	1338.62	1564.24	1335.63	1846.63	2027.21	1513.84	2100.79	1792.09	1983.74	1.3795	0.2	0.528743	1.48193	0.1	0.178349
Q8BGB8	Coq4	COQ4	410.175	436.135	421.582	424.677	470.909	498.682	452.032	548.069	388.415	1.11701	0.2	0.528743	1.07223	0.7	0.771399
Q9CXI0	Coq5	COQ5	1649.85	1673.87	1492.51	1927.08	1930.42	1783.58	2156.29	1943.66	2212.99	1.16803	0.1	0.408745	1.30696	0.1	0.178349
Q8R1S0	Coq6	COQ6	2824.62	2895.35	3130.74	3369.46	3238.13	3467.83	3484.2	3913.55	4207.04	1.16375	0.1	0.408745	1.35167	0.1	0.178349
P97478	Coq7	COQ7	1783.49	1412.91	1608.91	1614.85	1482.76	1640.11	1509.75	1469.61	1573.83	1.00369	1	1	0.938368	0.7	0.771399
Q8K1Z0	Coq9	COQ9	3180.74	2376.07	2587.15	2753.29	2370.02	2918.85	2509.36	2803.49	2856.49	1.06422	1	1	1.08362	1	1
O89053	Coro1a	COR1A	11212	9094.31	9159.36	8215.61	6821.98	6722.01	4847.05	4466.54	5139.58	0.74481	0.1	0.408745	0.529191	0.1	0.178349
Q9WUM3	Coro1b	COR1B	3703.59	3633.9	3407.36	3903.13	3445.74	3281.91	2951.23	1954.22	2681.84	0.948221	1	1	0.738006	0.1	0.178349
Q9WUM4	Coro1c	COR1C	5227.59	5090.35	5056.11	4484.49	4395.86	4076.16	4159.81	4386.93	4198.02	0.863567	0.1	0.408745	0.824702	0.1	0.178349
Q8C0P5	Coro2a	COR2A	1731.83	2212.04	1978.88	2724.7	3058.77	2860.05	3853.9	3023.72	3245.25	1.44529	0.1	0.408745	1.63994	0.1	0.178349
Q8BH44	Coro2b	COR2B	318.88	367.786	326.001	279.414	266.613	264.005	328.741	387.66	318.365	0.817829	0.1	0.408745	1.0084	1	1
Q9D2V7	Coro7	CORO7	8939.38	7465.65	7065.18	8200.54	7571.6	7356.31	5731.14	5342.13	5922.53	1.01419	1	1	0.767668	0.1	0.178349
Q9CQI6	Cotl1	COTL1	4119.34	3614.8	3533.81	3141.84	2709.86	3599.02	2475.09	2800.13	2596.37	0.86916	0.2	0.528743	0.718261	0.1	0.178349
Q8CFY5	Cox10	COX10	118.495	130.081	154.514	110.616	165.848	176.227	131.062	88.9762	158.943	1.27496	0.7	0.870445	1.00754	1	1
Q6P8I6	Cox11	COX11	448.344	405.404	281.517	473.237	450.528	429.262	313.44	251.994	351.822	1.11131	0.2	0.528743	0.773155	0.4	0.503145
Q8BH51	Cox14	COX14	93.0382	105.898	127.847	98.0033	155.57	119.206	147.431	75.2849	104.266	1.12567	0.7	0.870445	0.984589	1	1
Q8BJ03	Cox15	COX15	272.081	329.988	352.429	249.216	369.007	370.811	326.899	191.076	294.737	1.11824	0.7	0.870445	0.893175	0.4	0.503145
Q9CR63	Cox16	COX16	1019.85	1111.44	1049.91	950.076	1011.85	1312.07	1161.78	964.159	1215.72	0.963749	0.7	0.870445	1.10655	0.7	0.771399
Q8VC74	Cox18	COX18	655.571	691.506	713.758	678.495	660.215	932.201	903.454	587.452	829.394	0.981185	1	1	1.1994	0.7	0.771399
Q8K0C8	Cox19	COX19	201.496	157.554	289.513	187.045	246.599	168.902	185.316	160.082	175.909	0.928281	1	1	0.873015	0.7	0.771399
Q9D7J4	Cox20	COX20	228.356	269.114	283.522	213.101	287.201	350.029	263.023	200.088	249.592	1.06721	0.7	0.870445	0.927458	0.4	0.503145
P19783	Cox4i1	COX41	2912.63	3348.95	3776.62	3394.71	4259.73	4185.16	4690.44	2887.21	3964.58	1.24969	0.2	0.528743	1.18383	0.7	0.771399
Q91W29	Cox4i2	COX42	429.507	492.822	470.326	345.789	334.776	445.082	313.226	191.32	323.654	0.735211	0.2	0.528743	0.665976	0.1	0.178349
P12787	Cox5a	COX5A	8675.02	7027.16	7114.22	9343.3	9261.91	7451.94	8061.55	8750.41	7880.38	1.30189	0.2	0.528743	1.13316	0.4	0.503145
P19536	Cox5b	COX5B	7660.97	5646.05	6288.63	7384.72	6932.21	6338.57	5367.35	4558.18	5374.41	1.10234	0.7	0.870445	0.853501	0.1	0.178349
P43024	Cox6a1	CX6A1	696.978	646.165	912.53	270.801	514.875	551.921	318.574	255.865	260.535	0.738725	0.1	0.408745	0.373807	0.1	0.178349
P56391	Cox6b1	CX6B1	2779.2	2744.66	2210.67	3662.6	2795.54	2411.58	2720.61	2726.35	2549.33	1.01854	0.4	0.691041	0.991238	0.7	0.771399
Q9CPQ1	Cox6c	COX6C	2288.99	2887.27	3158.8	2441.17	2412.04	3442.18	3386.24	2482.58	3477.36	0.845494	1	1	1.17282	0.4	0.503145
P56392	Cox7a1	CX7A1	1067.85	1217.69	1166.54	1190.97	1578	1097.8	1501.4	1381.02	1565.53	1.02094	0.7	0.870445	1.28705	0.1	0.178349
P48771	Cox7a2	CX7A2	1465.07	1348.43	1406.62	1453.59	1940.7	1465.89	1451.25	1318.26	1411.19	1.04214	0.2	0.528743	1.00325	1	1
Q61387	Cox7a2l	COX7R	154.568	197.377	203.902	158.807	222.949	231.735	174.146	196.317	208.144	1.12956	0.4	0.691041	0.99463	1	1
P17665	Cox7c	COX7C	921.466	880.619	863.612	1170.94	1405.89	1081.28	1158.56	1404.93	1102.2	1.32968	0.1	0.408745	1.31562	0.1	0.178349
Q61147	Cp	CERU	7586.83	5695.64	5686.02	4865.56	5494.57	5507.67	4392.62	4083.18	4363.33	0.964698	0.1	0.408745	0.766082	0.1	0.178349
Q7TPZ8	Cpa1	CBPA1	2890.59	1444.95	203.102	616.178	115.117	79.9005	215.264	698.417	707.906	0.079669	0.2	0.528743	0.48335	0.7	0.771399
P15089	Cpa3	CBPA3	199.277	209.15	295.424	240.251	225.584	153.687	247.384	168.072	302.898	1.07858	1	1	1.18281	1	1
B2RS76	Cpb1	B2RS76	938.094	734.673	190.873	817.564	254.092	201.494	563.769	1683.14	570.058	0.345857	1	1	0.775934	1	1
O89001	Cpd	CBPD	7230.4	7141.1	6957.47	8131.42	7430.75	6991.35	8800.72	9134.11	8940.49	1.04056	0.4	0.691041	1.25198	0.1	0.178349
Q00493	Cpe	CBPE	4706.58	3538.36	3409.28	3150.35	2779.63	3252.47	2562.22	3058.41	2884.18	0.890342	0.1	0.408745	0.815118	0.1	0.178349
D3YUJ4	Cpeb2	D3YUJ4	1303.9	1250.06	1278.85	1677.61	1653.15	1496.34	1425.5	1313.37	1411.89	1.29269	0.1	0.408745	1.10403	0.1	0.178349
Q7TN98	Cpeb4	CPEB4	2465.85	2683.88	2410.71	3049.09	2938.47	2724.77	2977.84	3043.86	2907.93	1.19167	0.1	0.408745	1.20763	0.1	0.178349
P63040	Cplx1	CPLX1	80.6987	70.8285	55.8417	51.9751	73.6034	53.1586	32.465	23.9657	28.4907	0.750526	0.4	0.691041	0.402249	0.1	0.178349
Q80V42	Cpm	CBPM	511.352	686.331	579.373	641.985	550.989	405.731	584.622	574.145	647.837	0.951009	0.7	0.870445	1.00906	1	1
Q9DBB9	Cpn2	CPN2	2456.19	1747.37	1646.76	1448.79	1277.76	1351.54	1148.36	1224.19	1170.94	0.773471	0.1	0.408745	0.670116	0.1	0.178349
Q8C166	Cpne1	CPNE1	2154.38	2157.89	2002.26	2002.39	1728.51	1909.29	1543.59	1697.56	1606.44	0.886236	0.2	0.528743	0.745662	0.1	0.178349
P59108	Cpne2	CPNE2	1873.52	1610.53	1567.68	2015.95	1954.08	2079.63	1555.73	1333	1697.61	1.25173	0.1	0.408745	0.965974	0.4	0.503145
Q8BT60	Cpne3	CPNE3	3477.69	3776.32	3792.62	3746.25	4257.51	4847.82	3591.93	3416.88	4155.16	1.12742	0.4	0.691041	0.951172	1	1
Q9DC53	Cpne8	CPNE8	904.381	717.123	666.339	893.313	734.332	963.272	568.056	494.479	599.594	1.24569	0.4	0.691041	0.792132	0.1	0.178349
P36552	Cpox	HEM6	1798.12	1852.03	1720	2121.11	2000.07	1534.04	1983.54	1721.29	1934.65	1.11231	0.7	0.870445	1.07593	0.4	0.503145
Q8BFS6	Cpped1	CPPED	1962.57	1849.77	1683.72	1776.86	2035.06	2249.78	2022.88	1996.02	1783.25	1.10017	0.4	0.691041	1.07906	0.4	0.503145
Q9WVJ3	Cpq	CBPQ	2845.7	3128.97	2498.73	2539.07	1815.54	1937.86	2394.95	2297.57	2453.41	0.680978	0.2	0.528743	0.841603	0.1	0.178349
Q8C196	Cps1	CPSM	3217.74	4678.53	7276.75	3800.42	3819.58	5968.83	4626.54	5874.82	4619.3	0.816406	1	1	0.988888	1	1
Q9EPU4	Cpsf1	CPSF1	1741.68	2162.5	2101.75	2071.99	2308.65	2284.43	2468.51	2500.63	2332.57	1.08692	0.4	0.691041	1.1745	0.1	0.178349
O35218	Cpsf2	CPSF2	1971.07	2227.63	1962.46	2200.08	1983.21	2263.12	2315.27	2022.7	2079.28	1.11619	0.4	0.691041	1.0549	0.4	0.503145
Q9QXK7	Cpsf3	CPSF3	1075.85	1307.56	1262.97	1241.84	1220.32	1264.81	1425.61	1270.42	1313.86	0.98327	1	1	1.04029	0.2	0.301331
Q9CWS4	Cpsf3l	INT11	992.881	1219.64	1121.9	1176.65	1228.88	1408.71	1136.44	1064.93	1016.84	1.09536	0.2	0.528743	0.94922	1	1
B2LVG5	Cpsf4	B2LVG5	2232.22	1998.88	1757.13	2474.31	2011.5	2034.96	1863.59	1835.54	1505.69	1.01805	0.4	0.691041	0.918284	0.4	0.503145
Q6NVF9	Cpsf6	CPSF6	2872.91	2353.65	2469.33	2704.14	2777.69	2460.59	2199.53	2460.79	2510.7	1.09509	1	1	0.996542	0.7	0.771399
Q8BTV2	Cpsf7	CPSF7	709.459	830.332	814.979	757.782	728.939	717.41	829.025	885.287	792.159	0.894427	0.7	0.870445	1.01723	0.7	0.771399
P97742	Cpt1a	CPT1A	3686.71	4900.94	4912.22	3741.91	5015.96	5762.38	5336.09	3497.49	5239.2	1.02347	0.4	0.691041	1.06902	0.7	0.771399
P52825	Cpt2	CPT2	2606.86	3373.58	2990.03	3512.67	3535.38	3353.79	5024.38	4556.79	4433.29	1.17479	0.2	0.528743	1.52399	0.1	0.178349
Q64735	Cr1l	CR1L	1829.07	2050.78	2096.15	1821.46	1872.16	1965.12	2051.79	1602.65	2054.84	0.912901	0.4	0.691041	1.00049	1	1
P62965	Crabp1	RABP1	33.6287	27.7858	31.6686	27.6264	15.8179	24.8359	17.5234	15.6991	17.4048	0.784244	0.1	0.408745	0.549592	0.1	0.178349
O88843	Cradd	CRADD	176.759	191.902	163.717	140.108	173.415	194.164	160.866	43.8307	157.106	0.981082	1	1	0.888815	0.1	0.178349
P47934	Crat	CACP	1758.43	2060.12	1865.79	1772.21	1835.98	1746.42	1959.47	1937.06	1944.79	0.949844	0.4	0.691041	1.04234	0.7	0.771399
Q8C7D2	Crbn	CRBN	733.746	827.558	973.085	694.54	966.154	937.175	655.784	556.866	647.406	1.13246	1	1	0.782309	0.1	0.178349
O35427	Crcp	RPC9	335.352	290.175	276.53	346.767	371.879	303.267	268.798	269.023	278.868	1.19503	0.2	0.528743	0.927106	0.2	0.301331
Q01147	Creb1	CREB1	337.584	260.978	258.755	339.591	360.033	289.809	164.112	148.715	206.822	1.30123	0.2	0.528743	0.628835	0.1	0.178349
Q9Z125	Creb3l1	CR3L1	411.662	405.636	420.156	417.245	477.657	398.246	318.345	319.711	283.991	1.01356	1	1	0.773316	0.1	0.178349
P45481	Crebbp	CBP	1569.04	1391.31	1254.64	1884.54	1860.24	1576.26	1060.87	1048.71	1073.3	1.33704	0.1	0.408745	0.762497	0.1	0.178349
Q91XD7	Creld1	CREL1	208.751	165.818	200.73	182.77	190.265	178.701	153.393	175.687	169.769	0.910527	0.7	0.870445	0.845758	0.4	0.503145
Q9CYA0	Creld2	CREL2	743.095	633.763	608.894	638.214	682.863	502.641	407.537	457.128	419.163	1.00702	1	1	0.661388	0.1	0.178349
P63254	Crip1	CRIP1	1287.81	1098.92	1153.54	1300.37	1477.19	1161.29	1108.5	1344.69	1118.94	1.12729	0.2	0.528743	0.970005	1	1
Q9DCT8	Crip2	CRIP2	2596.89	1892.82	2251.14	1853	1499.88	2370.5	1259.41	2042.93	1759.86	0.823138	0.4	0.691041	0.781764	0.2	0.301331
Q64010	Crk	CRK	5545.44	4647.34	4824.87	5163.01	5196.74	4647.78	4505.24	4486.46	4782.4	1.07008	1	1	0.933754	0.2	0.301331
P47941	Crkl	CRKL	5787.49	4710.13	4829.82	5363.34	5550.95	4483.2	4120.72	3987.35	4040.99	1.11046	1	1	0.836675	0.1	0.178349
Q8CII9	Crlf2	CRLF2	168.181	105.2	106.696	143.305	170.674	117.854	105.571	89.3758	134.876	1.34312	0.4	0.691041	0.989456	0.7	0.771399
Q9Z2L7	Crlf3	CRLF3	715.532	657.936	573.535	724.007	601.965	544.62	463.252	391.151	440.488	0.914929	1	1	0.6695	0.1	0.178349
P97427	Crmp1	DPYL1	1262.52	1220.16	1129.39	980.395	947.241	976.251	766.475	583.12	837.573	0.800101	0.1	0.408745	0.628176	0.1	0.178349
P63154	Crnkl1	CRNL1	1791.9	2259.73	2260.14	1944.29	2322.56	2181.07	2334.32	2034.26	2402.18	0.965191	1	1	1.03301	0.4	0.503145
Q8CJ40	Crocc	CROCC	1946.11	1885.65	1784.41	1780.67	1618.97	1755.38	1671.66	1599	1742.11	0.930915	0.1	0.408745	0.886517	0.1	0.178349
Q9DC50	Crot	OCTC	176.993	186.802	168.056	156.867	118.575	322.616	172.442	191.081	238.702	0.886289	0.7	0.870445	1.0796	0.4	0.503145
Q68ED7	Crtc1	CRTC1	365.13	347.902	289.222	401.662	374.978	330.888	199.369	196.35	219.869	1.07783	0.4	0.691041	0.573061	0.1	0.178349
Q3U182	Crtc2	CRTC2	1934.63	1739.62	1417.29	2024.06	2018.87	1776.89	1002.49	923.674	1120.31	1.16052	0.2	0.528743	0.57627	0.1	0.178349
Q91X84	Crtc3	CRTC3	255.902	226.693	207.499	299.111	281.694	268.095	199.376	173.56	215.441	1.24262	0.1	0.408745	0.879498	0.2	0.301331
P23927	Cryab	CRYAB	3066.97	2180.22	3327.54	2014.08	2445.17	1963.19	1571.81	2067.39	1630.1	0.6567	0.2	0.528743	0.531502	0.1	0.178349
Q99KP3	Cryl1	CRYL1	5217.24	5448.25	5064.49	6079.9	6102.41	6565.53	7098.05	7133.96	7056.42	1.16966	0.1	0.408745	1.3605	0.1	0.178349
O54983	Crym	CRYM	417.194	412.801	345.543	323.73	288.857	390.535	229.343	205.288	203.3	0.784228	0.2	0.528743	0.497305	0.1	0.178349
P47199	Cryz	QOR	2476.45	2315.06	2147.3	2369.12	2268.65	1957.73	1914.47	1984.69	1890.85	0.979953	0.7	0.870445	0.826963	0.1	0.178349
Q921W4	Cryzl1	QORL1	1236.75	894.804	885.909	1370.4	1721.17	1386.03	1462.52	1408.48	1546.6	1.54898	0.1	0.408745	1.63446	0.1	0.178349
Q9CZU6	Cs	CISY	11833.9	12788.8	14085.8	11720.4	11197.6	12375.8	10532.1	11341.9	11809.8	0.916458	0.2	0.528743	0.886862	0.1	0.178349
Q9DBE0	Csad	CSAD	1542.73	1731.72	1698.4	1586.3	1402.72	1616.77	1662.61	1549.14	1530.68	0.933997	0.4	0.691041	0.912117	0.4	0.503145
Q91W50	Csde1	CSDE1	10832	11620.6	11316.3	10865.5	10368.3	11316.1	10837.3	11896.7	11496.2	0.960164	0.4	0.691041	1.0159	0.7	0.771399
Q9ERK4	Cse1l	XPO2	6805.38	8058.19	8452.29	5799.84	7464.3	8691.33	8384.42	5942.62	7524.31	0.9263	1	1	0.933747	0.7	0.771399
P09581	Csf1r	CSF1R	1442.25	1393.65	1214.06	1155.11	1075.55	1113.43	1019.77	728.828	995.853	0.798931	0.1	0.408745	0.714565	0.1	0.178349
P41241	Csk	CSK	2288.21	2832.67	2670.77	2551.85	2878.08	2280.83	3669.33	3160.35	3036.28	0.955474	1	1	1.18331	0.1	0.178349
P02666	CSN2	CASB	99.6954	144.334	81.8632	100.788	156.802	89.8978	69.4847	161.316	69.9815	1.01096	0.7	0.870445	0.701953	0.7	0.771399
Q8BK63-2	Csnk1a1	KC1A	889.093	1094.47	1205.15	1015.64	1136.95	1175.77	1335.13	1382.58	1395.98	1.03881	1	1	1.26324	0.1	0.178349
Q9DC28	Csnk1d	KC1D	364.334	483.928	510.719	437.306	484.444	456.278	574.892	803.203	642.234	0.942863	1	1	1.32713	0.1	0.178349
Q8BTH8	Csnk1g1	KC1G1	28.3614	23.8253	26.9302	31.1728	36.3166	35.4368	29.1804	26.7208	29.4331	1.31588	0.1	0.408745	1.08356	0.4	0.503145
Q8C4X2	Csnk1g3	KC1G3	1204.16	1454.65	1420.96	1590.53	1699.91	1506.34	1940.17	2827.79	2197.22	1.11933	0.1	0.408745	1.54629	0.1	0.178349
Q60737	Csnk2a1	CSK21	2790.53	3001.26	2584.52	3680.38	4105.25	3161.99	3378.72	4522.56	3672.05	1.31888	0.1	0.408745	1.3159	0.1	0.178349
O54833	Csnk2a2	CSK22	1455.29	1710.6	1474.45	2100.1	2202.82	1732.72	2270.51	2737.85	2454.73	1.42433	0.1	0.408745	1.66484	0.1	0.178349
P67871	Csnk2b	CSK2B	3427.7	3003.87	2679.56	3442.97	3205.47	3220.44	2182.28	2161.81	2078.25	1.0721	0.4	0.691041	0.719675	0.1	0.178349
Q8VHY0	Cspg4	CSPG4	12821.7	10385.8	10459	10593.9	8380.29	10860.5	7259.72	7182.97	7296.49	1.0129	1	1	0.694112	0.1	0.178349
P97315	Csrp1	CSRP1	7409.61	8203.01	8686.94	8064.31	6124.51	6841.88	6129.12	6231.58	6268.06	0.834069	0.2	0.528743	0.75967	0.1	0.178349
P97314	Csrp2	CSRP2	1182.98	1255.24	1415.62	1334.25	1070.46	1646.33	1168.94	1109	1162.02	1.06294	1	1	0.925735	0.1	0.178349
P21460	Cst3	CYTC	667.227	609.242	545.7	578.643	650.771	589.16	466.041	400.628	492.96	0.967038	1	1	0.764952	0.1	0.178349
P56567	Csta	CYTA	267.315	228.97	192.838	349.179	305.704	283.406	332.092	300.443	240.111	1.33513	0.1	0.408745	1.31215	0.2	0.301331
Q62426	Cstb	CYTB	3282.73	2780.43	2683.16	2687.02	3113.97	2431.19	2190.25	2535.18	2354.92	0.966404	0.7	0.870445	0.846963	0.1	0.178349
Q99LC2	Cstf1	CSTF1	1240.77	1349.43	1210.3	1356.14	1345.67	1213.91	1378.46	1360.19	1379.06	1.08454	0.7	0.870445	1.11097	0.1	0.178349
Q8BIQ5	Cstf2	CSTF2	4462.32	3166.49	3438.49	4112.79	4332.12	3571.82	2421.46	2560.94	2689.42	1.1961	0.7	0.870445	0.744786	0.1	0.178349
Q8C7E9	Cstf2t	CSTFT	1215.34	1062.7	939.233	1262.99	1287.65	1065.95	421.788	282.439	445.177	1.18847	0.2	0.528743	0.396902	0.1	0.178349
Q99LI7	Cstf3	CSTF3	862.849	1051.15	1000.45	901.99	1015.92	988.97	1210.81	927.428	1118.53	0.988525	1	1	1.11803	0.4	0.503145
E9Q3S2	Ctage5	E9Q3S2	4818.14	4721.59	4506.78	4806.76	4650.35	4739.31	4223.94	4322.12	4344.83	1.00375	1	1	0.915395	0.1	0.178349
O88712	Ctbp1	CTBP1	2509.4	2816.15	2847.8	2691.01	2478.98	2820.25	3210.62	2700.99	2893.29	0.955563	0.7	0.870445	1.02739	0.4	0.503145
P56546	Ctbp2	CTBP2	1244.14	1413.08	1319.33	1581.08	1543.14	1426.94	1727.22	1651.21	1584.71	1.16964	0.1	0.408745	1.25155	0.1	0.178349
Q8R242	Ctbs	DIAC	463.768	382.736	334.118	411.406	373.073	344.71	369.909	348.68	404.698	0.974753	1	1	0.966486	1	1
Q5SUQ9	Ctc1	CTC1	284.456	331.936	290.888	336.808	320.695	334.067	396.772	472.287	355.291	1.14844	0.2	0.528743	1.364	0.1	0.178349
Q61164	Ctcf	CTCF	708.939	786.666	738.523	731.485	860.031	1194.54	618.62	626.081	632.266	1.16453	0.4	0.691041	0.847747	0.1	0.178349
Q7TSG2	Ctdp1	CTDP1	3192.38	3065.07	2858.79	3224.86	3175.63	3152.95	2521.31	1983.53	2415.38	1.03607	0.4	0.691041	0.788034	0.1	0.178349
P58466	Ctdsp1	CTDS1	711.13	686.951	643.548	664.241	622.689	600.68	630.657	536.213	659.253	0.906453	0.2	0.528743	0.918052	0.2	0.301331
P58465	Ctdspl	CTDSL	172.613	182.978	166.447	164.002	199.88	168.611	180.522	165.316	206.278	0.976815	1	1	1.04582	1	1
Q8BG15	Ctdspl2	CTSL2	726.399	753.46	756.6	781.104	861.231	848.446	614.691	722.039	634.224	1.12607	0.1	0.408745	0.841749	0.1	0.178349
P29268	Ctgf	CTGF	122.836	95.0215	71.8492	119.582	99.2392	77.6504	63.8073	97.503	71.5991	1.04439	1	1	0.753504	0.4	0.503145
Q8VCN5	Cth	CGL	2729.26	3427.64	2923.68	3757.1	3500.2	3362.77	3819.05	2474.15	3223.51	1.19719	0.2	0.528743	1.10255	1	1
Q6PEE2	Ctif	CTIF	1117.79	1179.56	1057.85	1297.35	1095.04	1169.35	962.887	932.504	912.575	1.04613	0.7	0.870445	0.834239	0.1	0.178349
P26231	Ctnna1	CTNA1	9100.69	11688.7	11996.6	11736.8	14366.4	12596.5	18639.9	19885.9	19349.8	1.07767	0.2	0.528743	1.65543	0.1	0.178349
Q61301	Ctnna2	CTNA2	102.266	129.005	99.9986	90.5868	105.827	100.844	118.782	90.0434	132.006	0.986095	0.7	0.870445	1.1615	1	1
Q65CL1	Ctnna3	CTNA3	382.88	376.931	345.695	257.157	279.879	286.473	308.471	295.593	332.098	0.742521	0.1	0.408745	0.818375	0.1	0.178349
O88327	Ctnnal1	CTNL1	258.82	377.216	397.119	229.183	280.461	324.562	331.346	253.727	313.48	0.743502	0.4	0.691041	0.831036	0.4	0.503145
Q02248	Ctnnb1	CTNB1	9464.58	10989.3	11592.2	12043	13614.2	12753.4	15419.4	18649.3	16278.2	1.16053	0.1	0.408745	1.48128	0.1	0.178349
Q9JJN6	Ctnnbip1	CNBP1	178.489	129.032	136.085	184.801	219.15	173.426	136.877	144.115	132.437	1.35798	0.2	0.528743	1.00582	1	1
Q9CWL8	Ctnnbl1	CTBL1	2362.53	3184.27	2967.5	2668.36	3050.97	3034.59	3582.57	3744.09	3572.57	1.02261	1	1	1.20727	0.1	0.178349
P30999-2	Ctnnd1	CTND1	9992.91	11102.1	10290	11844.4	12584.4	12781.6	13337.8	11993.2	13965.1	1.22297	0.1	0.408745	1.29619	0.1	0.178349
P30999	Ctnnd1	CTND1	640.549	709.626	584.919	719.891	845.762	911.732	704.847	386.338	795.556	1.32037	0.1	0.408745	1.10038	1	1
P70698	Ctps1	PYRG1	4305.76	4772.64	4693.32	4860	4566.95	5168.73	5434.07	5556.56	5033.6	1.03551	0.4	0.691041	1.15783	0.1	0.178349
P70303	Ctps2	PYRG2	4192.3	4983.05	5117.22	4673.64	4307.65	4288.71	5849.77	5337.57	4860.29	0.864461	0.7	0.870445	1.07115	0.4	0.503145
Q62018	Ctr9	CTR9	1163.78	1467.67	1449.39	1258.33	1502.34	1452.91	1737.09	1822.6	1713.2	1.00243	0.7	0.870445	1.1985	0.1	0.178349
Q9CR35	Ctrb1	CTRB1	5016.76	1707.18	197.904	1013.72	269.853	497.135	401.564	1148.01	752.507	0.291202	0.7	0.870445	0.440789	0.7	0.771399
P16675	Ctsa	PPGB	1749.42	1830.61	1607.7	1863.43	1763.95	1798.92	1803.27	1770.39	1699.25	1.02829	0.4	0.691041	1.01199	1	1
P10605	Ctsb	CATB	2825.08	2600.36	2331.65	2743.53	2251.46	2501.59	2368.98	1774.5	2146.04	0.962017	0.7	0.870445	0.825286	0.2	0.301331
P97821	Ctsc	CATC	2489.78	1936.54	1734.66	2240.58	3148.89	2599.58	1359.81	1228.59	1265.9	1.34238	0.2	0.528743	0.653692	0.1	0.178349
P18242	Ctsd	CATD	16942.7	12886.5	12671.5	12366.4	9979.06	10485.4	6923.1	7516.84	7039.8	0.813673	0.1	0.408745	0.546293	0.1	0.178349
P70269	Ctse	CATE	289.63	249.454	232.294	273.817	201.398	207.665	197.759	244.689	219.83	0.832478	0.4	0.691041	0.881245	0.2	0.301331
Q9R013	Ctsf	CATF	363.605	276.742	243.311	322.006	209.016	324.499	214.586	180.373	192.476	1.16356	1	1	0.695507	0.1	0.178349
P49935	Ctsh	CATH	1439.74	1506.28	1413.35	1194.71	1219.63	935.245	954.734	878.078	1083.51	0.82981	0.1	0.408745	0.663129	0.1	0.178349
P06797	Ctsl	CATL1	312.168	275.199	268.867	269.867	264.08	270.801	208.255	222.987	213.814	0.980625	0.4	0.691041	0.776943	0.1	0.178349
Q8BM88	Ctso	CATO	727.943	643.787	553.178	581.587	595.82	628.428	557.626	513.487	544.148	0.925492	0.7	0.870445	0.84523	0.2	0.301331
O70370	Ctss	CATS	1734.56	1323.04	1201.22	1377.69	1613.03	1308.26	1246.55	1274.2	1215.01	1.04131	1	1	0.942186	0.7	0.771399
P56203	Ctsw	CATW	170.585	160.778	97.5856	168.339	148.759	113.011	103.929	82.0162	102.504	0.925245	1	1	0.63755	0.4	0.503145
Q9WUU7	Ctsz	CATZ	4093.54	3495.09	3195.12	3272.9	2577.18	2730.53	2373.71	1898.59	1880.85	0.781247	0.2	0.528743	0.543216	0.1	0.178349
Q60598	Cttn	SRC8	7180.4	5798.7	6158.4	7810.94	8307.96	7461.7	5839.86	6567.99	5757.33	1.26834	0.1	0.408745	0.948276	0.7	0.771399
B9EJA2	Cttnbp2	CTTB2	1094.13	962.552	1046.31	896.487	948.153	855.807	802.95	879.776	819.4	0.856808	0.1	0.408745	0.783133	0.1	0.178349
Q99LJ0	Cttnbp2nl	CT2NL	3143.61	2847.59	2770.08	3540.38	3334.14	3066.29	2818.64	2702.36	3010.03	1.17086	0.2	0.528743	0.989834	0.7	0.771399
Q99J10	Ctu1	CTU1	206.13	266.389	249.218	258.712	282.872	271.337	312.594	245.271	278.095	1.08875	0.2	0.528743	1.11587	0.4	0.503145
Q3U308	Ctu2	CTU2	266.708	317.114	297.086	286.846	329.072	333.455	393.409	330.145	386.829	1.10767	0.4	0.691041	1.30208	0.1	0.178349
Q8R3V6	Cuedc1	CUED1	764.543	641.283	643.988	600.5	578.483	522.064	380.34	425.921	373.436	0.898282	0.1	0.408745	0.590601	0.1	0.178349
Q9CXX9	Cuedc2	CUED2	567.333	531.264	535.524	581.952	473.278	482.789	339.609	284	337.878	0.901526	0.7	0.870445	0.63093	0.1	0.178349
Q9WTX6	Cul1	CUL1	2044.42	2542.92	2599.77	2115.17	2288.55	2589.97	2983.52	3297.38	3036.23	0.899969	1	1	1.19399	0.1	0.178349
Q9D4H8	Cul2	CUL2	774.211	883.39	1078.66	709.054	1057.46	1099.89	1388.56	1144.66	1128.41	1.19705	1	1	1.29576	0.1	0.178349
Q9JLV5	Cul3	CUL3	1674.41	2172.78	2234.73	1953.26	2095.13	2051.7	2585.86	3109.76	2523.98	0.944274	0.7	0.870445	1.19012	0.1	0.178349
Q3TCH7	Cul4a	CUL4A	1704.83	1976.57	2338.74	1606.99	2127.06	2174.19	2123.1	2189.52	2397.6	1.07614	1	1	1.10774	0.4	0.503145
A2A432	Cul4b	CUL4B	2811.3	3657.39	3740.71	2811.99	3342.74	3739.8	3725.42	2569.9	3602.98	0.913969	1	1	0.985123	0.7	0.771399
Q9D5V5	Cul5	CUL5	3913.58	4683.67	4321.73	4020.8	4345.01	4052.67	4641.64	4423.21	4769.25	0.937743	1	1	1.07402	0.4	0.503145
Q9CQ89	Cuta	CUTA	1046.26	823.612	952.331	949.62	1015.58	817.547	782.91	827.556	802.016	0.997153	0.7	0.870445	0.842161	0.2	0.301331
Q9D1U5	Cutal	Q9D1U5	140.808	187.828	192.364	209.357	250.404	193.075	294.957	199.761	306.023	1.11462	0.1	0.408745	1.57036	0.1	0.178349
Q9D8X1	Cutc	CUTC	2626.38	2440.7	2282.96	2175.87	2592.28	2416.25	1920.24	2014.54	2267.74	0.989982	0.7	0.870445	0.825394	0.1	0.178349
P70403	Cux1	CASP	171.732	193.135	163.741	183.332	229.161	192.281	164.961	154.557	145.121	1.11966	0.4	0.691041	0.89999	0.2	0.301331
P53564-3	Cux1	CUX1	3228.08	3135.96	3144.51	3521.65	3152.26	3093.85	3258.18	3444.06	3367.95	1.00246	1	1	1.07106	0.1	0.178349
P70412	Cuzd1	CUZD1	41.5661	24.1081	24.0264	74.0541	61.6523	27.1604	101.499	149.169	101.412	2.55733	0.2	0.528743	4.21016	0.1	0.178349
Q9JHS9	Cwc15	CWC15	1047.31	906.117	868.945	1054.46	972.372	1012.86	671.262	598.909	709.125	1.1178	0.4	0.691041	0.740812	0.1	0.178349
Q8C5N3	Cwc22	CWC22	500.17	724.855	678.859	587.476	811.463	874.005	858.372	735.424	951.791	1.19533	0.4	0.691041	1.26443	0.1	0.178349
Q9DBF7	Cwc25	CWC25	137.775	162.728	145.608	124.952	156.024	136.241	156.362	138.24	125.22	0.93567	0.4	0.691041	0.949398	0.7	0.771399
Q3TKY6	Cwc27	CWC27	2784.81	2288.8	2402.52	2638.29	2833.76	2790.75	1994.44	1841	2079.19	1.16159	0.2	0.528743	0.830145	0.1	0.178349
Q8CI33	Cwf19l1	C19L1	4089.67	4028.44	4065.47	3913.98	4055.8	3993.97	3836.02	4394.92	4093.62	0.982413	0.2	0.528743	1.00692	0.7	0.771399
Q8BG79	Cwf19l2	C19L2	407.38	448.583	421.336	469.125	475.196	447.222	531.188	452.769	456.379	1.11342	0.2	0.528743	1.08317	0.1	0.178349
Q91YL7	Cwh43	PG2IP	456.785	485.746	510.412	774.451	987.885	833.602	1591.2	1809.15	1551.26	1.71613	0.1	0.408745	3.27579	0.1	0.178349
O35188	Cx3cl1	X3CL1	63.8692	64.2005	48.1398	75.8181	80.525	44.7579	104.642	142.272	87.6906	1.18708	0.7	0.870445	1.63838	0.1	0.178349
P97792	Cxadr	CXAR	550.308	510.312	477.247	668.619	633.238	696.351	597.679	534.137	557.615	1.31022	0.1	0.408745	1.09269	0.2	0.301331
Q9CWW7	Cxxc1	CXXC1	643.02	606.08	574.336	680.035	776.982	717.764	559.826	587.388	516.574	1.18427	0.1	0.408745	0.923683	0.2	0.301331
Q60720	Cyb561	CY561	109.923	117.43	113.05	103.873	97.4015	114.445	93.6638	43.6846	106.434	0.918824	0.4	0.691041	0.828517	0.1	0.178349
P56395	Cyb5a	CYB5	1611.58	1344.21	1251.99	1507.45	1486.72	1287.34	1102.74	989.89	1144.8	1.10602	1	1	0.820363	0.1	0.178349
Q9CQX2	Cyb5b	CYB5B	4583.27	4372.53	3991.47	4682.69	6050.78	4764.94	4444.13	4194.83	4726.11	1.08974	0.1	0.408745	1.01638	0.7	0.771399
Q9DB73	Cyb5r1	NB5R1	1891.02	1707.68	1949.79	2075.65	1545.74	1586.86	1538.26	1826.25	1777.94	0.839156	0.7	0.870445	0.940202	0.4	0.503145
Q9DCN2	Cyb5r3	NB5R3	5425.06	4807.15	5213.16	5193.66	4457.65	4130.7	4673.62	5536.72	4852.26	0.855076	0.2	0.528743	0.930771	1	1
Q3TDX8	Cyb5r4	NB5R4	426.626	586.889	410.824	496.288	551.599	457.984	589.034	455.976	507.432	1.16329	0.7	0.870445	1.18941	0.4	0.503145
Q61462	Cyba	CY24A	211.824	258.819	216.414	165.437	157.084	200.785	121.201	65.6813	126.615	0.764447	0.1	0.408745	0.560042	0.1	0.178349
Q61093	Cybb	CY24B	2371.34	2501.96	2336.17	1322.64	1527.92	1890.61	1441.49	1184.5	1489.56	0.644328	0.1	0.408745	0.60788	0.1	0.178349
Q9D0M3	Cyc1	CY1	4401.63	4914.87	4251.4	5119.33	5379.37	4763.42	5399.99	3593.07	5349.94	1.16305	0.2	0.528743	1.21545	0.7	0.771399
P62897	Cycs	CYC	7628.16	7852.36	7849.29	7521.77	7781.19	7569.7	8731.32	8938.7	9218.87	0.96438	0.2	0.528743	1.13879	0.1	0.178349
Q7TMB8	Cyfip1	CYFP1	2621	3323.79	3658.71	2917.96	3584.26	3303.58	4312.16	3975.63	3948.86	0.99392	1	1	1.19611	0.1	0.178349
Q5SQX6	Cyfip2	CYFP2	163.586	211.602	226.999	149.938	167.943	158.078	179.318	166.765	142.872	0.747053	0.2	0.528743	0.788107	0.4	0.503145
Q9CX80	Cygb	CYGB	2256.43	2371.35	2169.5	2233.53	2382.44	2021.16	2448.71	1668.4	2067.08	0.989851	1	1	0.916084	0.7	0.771399
Q9QXA1-2	Cyhr1	CYHR1	128.018	162.914	136.479	168.525	141.104	127.466	186.27	141.278	157.032	1.03389	1	1	1.1506	0.4	0.503145
Q80TQ2	Cyld	CYLD	1546.62	1741.53	1709.63	1512.89	1535.2	1488.98	1828.56	1458.41	1628.4	0.884922	0.1	0.408745	0.952487	1	1
Q8BKE6	Cyp20a1	CP20A	1494.57	1789.53	1948.09	1291.06	1641.67	1771	1543.81	928.925	1584.56	0.917375	0.4	0.691041	0.86269	0.4	0.503145
Q9DBG1	Cyp27a1	CP27A	1832.7	1880.96	1944.09	1218.64	1489.31	1746.25	1421.33	1775.34	1722.37	0.791782	0.1	0.408745	0.915687	0.1	0.178349
Q9D816	Cyp2c55	CP255	4541.02	7319.31	5657.61	7518.87	7424.74	9181.66	8791.62	3115.54	4876.39	1.32898	0.1	0.408745	0.861917	1	1
Q148B1	Cyp2c65	Q148B1	2749.59	3797.46	3428.01	5563.82	7218.3	6855.89	10488.8	7562.29	8454.47	1.99996	0.1	0.408745	2.46629	0.1	0.178349
K7N6C2	Cyp2c68	K7N6C2	256.297	257.717	310.302	113.976	169.36	246.781	152.527	255.462	154.445	0.657155	0.1	0.408745	0.599281	0.1	0.178349
P24456	Cyp2d10	CP2DA	1245.33	1564.96	1468.27	946.01	1015.45	1324.35	859.439	1248.16	1095.41	0.691596	0.2	0.528743	0.746055	0.2	0.301331
Q9JKY7	Cyp2d22	Q9JKY7	1316.2	1460.26	1526.5	1030.97	1105.76	1149.19	1108.21	1115.39	1009.98	0.757235	0.1	0.408745	0.758913	0.1	0.178349
L7N463	Cyp2d34	L7N463	103.12	141.012	107.449	89.5072	128.234	142.766	127.967	117.897	123.003	1.19344	1	1	1.14476	0.7	0.771399
Q05421	Cyp2e1	CP2E1	92.1121	87.8738	96.1919	70.3156	82.092	45.6279	66.7983	44.8224	84.3944	0.76337	0.1	0.408745	0.725185	0.1	0.178349
P33267	Cyp2f2	CP2F2	81.0308	63.1384	76.8429	86.4348	64.1808	59.106	69.3047	61.3354	50.8931	0.835221	1	1	0.798192	0.2	0.301331
G3UXT0	Cyp2j12	G3UXT0	18.7526	36.9322	29.7156	26.2891	40.1288	32.8467	37.2439	49.5677	39.9415	1.10537	0.7	0.870445	1.34413	0.1	0.178349
O54750	Cyp2j6	CP2J6	740.432	931.677	847.891	783.888	1110.35	1188.65	1018.34	1053.05	1089.42	1.30954	0.4	0.691041	1.24196	0.1	0.178349
Q924D1	Cyp2j9	Q924D1	219.231	261.177	258.014	178.177	191.875	220.824	141.443	127.17	177.072	0.743661	0.2	0.528743	0.548199	0.1	0.178349
Q9DBX6	Cyp2s1	CP2S1	1524.45	2425.75	2420.24	1654.06	2471.25	2647.53	2996.12	2493.29	3143.42	1.02108	0.4	0.691041	1.23794	0.1	0.178349
Q9JKJ9	Cyp39a1	CP39A	94.9499	107.012	119.206	82.3438	78.0158	117.234	76.2527	54.719	78.472	0.769482	0.4	0.691041	0.712562	0.1	0.178349
Q64464	Cyp3a13	CP3AD	2975.38	3526.01	3694.9	3982.48	5094.81	4713.95	6954.19	5677.59	7220.78	1.33691	0.1	0.408745	1.97226	0.1	0.178349
Q99N19	Cyp4f13	Q99N19	323.354	476.08	491.038	400.005	456.992	477.624	708.746	514.505	596.029	0.959906	1	1	1.25195	0.1	0.178349
Q9EP75	Cyp4f14	CP4FE	109.797	104.548	117.54	125.415	176.826	157.44	173.171	187.245	161.393	1.43392	0.1	0.408745	1.57719	0.1	0.178349
G3UW81	Cyp4f40	G3UW81	702.094	861.921	844.953	940.662	904.771	1094.13	1244.2	984.873	1026.77	1.11327	0.1	0.408745	1.21518	0.1	0.178349
Q8K0C4	Cyp51a1	CP51A	2287.99	2827.35	3053.6	2670.66	2848.11	3254.1	3752.37	5411.25	3857.36	1.00734	0.7	0.870445	1.3643	0.1	0.178349
Q8K353	Cystm1	CYTM1	189.776	210.897	216.893	197.416	232.727	231.359	284.594	192.736	299.789	1.09702	0.4	0.691041	1.34945	0.4	0.503145
Q9QX11	Cyth1	CYH1	774.592	918.885	914.872	873.377	969.664	955.057	976.372	857.326	853.192	1.04392	0.4	0.691041	0.937099	1	1
P63034	Cyth2	CYH2	427.346	414.731	450.311	418.168	482.392	513.949	525.701	541.281	562.577	1.12881	0.4	0.691041	1.26661	0.1	0.178349
O08967	Cyth3	CYH3	369.114	451.371	446.599	409.934	431.744	438.756	452.476	346.173	485.132	0.966737	0.7	0.870445	1.01316	0.7	0.771399
Q9D172	D10Jhu81e	ES1	7171.23	5754.26	6196.09	6030.19	5924.5	5223.09	4743.86	4747.01	4950.54	0.956168	0.4	0.691041	0.76613	0.1	0.178349
Q9CX66	D10Wsu102e	CL045	459.463	497.002	346.477	541.838	430.044	339.709	381.081	238.127	334.479	0.935971	1	1	0.727978	0.2	0.301331
Q91UZ6	D17H6S56E-5	Q91UZ6	668.346	713.236	691.704	874.578	741.145	731.373	669.595	691.393	704.944	1.07148	0.1	0.408745	0.99955	1	1
Q9CPT4	D17Wsu104e	CS010	3485.48	3179.97	3239.18	3453.34	3316.51	3664.81	3244.32	3142.62	3105.93	1.06611	0.4	0.691041	0.97019	0.4	0.503145
Q3TT38	D17Wsu92e	CF106	399.389	335.034	285.755	461.98	438.243	415.658	248.251	212.24	270.545	1.30805	0.1	0.408745	0.740973	0.1	0.178349
Q8VEB3	D1Ertd622e	CE030	231.732	184.776	166.523	276.631	248	277.031	177.213	204.397	187.168	1.49711	0.1	0.408745	1.01294	1	1
Q8CIM3	D2hgdh	D2HDH	537.366	502.413	394.463	281.64	177.581	544.012	214.149	490.81	218.736	0.560575	0.7	0.870445	0.435371	0.2	0.301331
Q3UHX9	D2Wsu81e	CI114	98.1506	101.836	82.8811	120.975	125.48	128.907	106.595	109.463	103.439	1.27844	0.1	0.408745	1.08604	0.1	0.178349
Q8BGN2	D3Ertd751e	CD033	580.735	474.504	448.059	518.284	470.138	433.441	342.953	373.423	368.018	0.990799	0.7	0.870445	0.775585	0.1	0.178349
Q8K0M7	D630039A03Rik	Q8K0M7	1531.32	1293.37	1295.23	1414.84	1358.31	1278.3	833.54	802.736	828.104	1.0487	1	1	0.639349	0.1	0.178349
Q91YN0	D6Wsu163e	CL004	202.678	215.68	194.519	197.162	221.743	242.618	270.841	252.032	252.519	1.09407	0.4	0.691041	1.24591	0.1	0.178349
Q8BPM0	Daam1	DAAM1	1966.85	2174.48	2308.02	2266.87	2670.68	2584.46	3282.2	3936.35	3258.92	1.18854	0.2	0.528743	1.50942	0.1	0.178349
Q80U19	Daam2	DAAM2	498.964	628.551	602.274	618.12	656.688	538.354	798.682	892.377	743.335	1.02631	0.7	0.870445	1.32611	0.1	0.178349
P98078	Dab2	DAB2	2414.27	1996.58	2053.54	2468.65	2192.68	1944.01	1072.8	1002.43	1218.31	1.06776	1	1	0.522415	0.1	0.178349
Q3UHC7	Dab2ip	DAB2P	2144.4	2112.74	1993.03	2164.94	2327.42	2211.32	2093.24	2151.44	2108.21	1.04666	0.1	0.408745	0.997856	1	1
P61804	Dad1	DAD1	218.855	283.159	257.657	308.209	222.053	230.308	321.319	164.424	263.502	0.893855	1	1	1.02269	1	1
Q62165	Dag1	DAG1	9350.62	7575.84	7891.17	7206.86	7004.45	6415.75	5576.27	5640.55	6207.45	0.887631	0.1	0.408745	0.714793	0.1	0.178349
Q91WC9	Daglb	DGLB	646.852	631.632	667.827	559.25	578.112	662.808	589.994	481.923	545.776	0.893731	0.4	0.691041	0.843742	0.1	0.178349
Q8VC30	Dak	DHAK	1751.81	2435	2103.16	2002.46	1863.05	2092.14	2642.03	2687.6	2404.27	0.95212	0.7	0.870445	1.25622	0.2	0.301331
Q6PJN8	Dalrd3	DALD3	240.273	239.612	230.838	231.726	246.676	300.352	252.402	257.974	256.932	1.02948	0.4	0.691041	1.07228	0.1	0.178349
Q91XC8	Dap	DAP1	206.306	207.321	179.622	224.253	247.268	144.335	169.792	189.106	173.824	1.08699	0.7	0.870445	0.842554	0.2	0.301331
Q9ER88	Dap3	RT29	1370.78	1555.29	1607.15	1418.57	1692.1	1684	1975.08	1851.78	2088.36	1.08276	0.4	0.691041	1.26991	0.1	0.178349
Q8VDF3	Dapk2	DAPK2	2112.89	2504.33	2432.94	2284.02	2942.12	2864.66	2945.39	3217.97	2807.08	1.17745	0.4	0.691041	1.21063	0.1	0.178349
O54784	Dapk3	DAPK3	711.524	841.171	837.467	882.301	913.183	735.071	1126.03	1482.64	1063.45	1.05354	0.4	0.691041	1.34457	0.1	0.178349
Q922B2	Dars	SYDC	5075.6	6708.72	6383.98	5814.31	6674.72	6213.33	8112.5	6755.32	7074.53	0.973269	1	1	1.10817	0.1	0.178349
Q8BIP0	Dars2	SYDM	1128.15	1231.63	1108.29	1422.42	1228.52	1310.08	1562.3	1467.16	1389.04	1.16126	0.2	0.528743	1.3005	0.1	0.178349
O35613	Daxx	DAXX	159.05	181.419	178.86	165.816	171.791	177.881	160.868	158.931	171.974	0.960477	0.7	0.870445	0.899407	0.4	0.503145
Q9JII5	Dazap1	DAZP1	4453.18	4234.19	3838.72	4512.57	4509.05	4216.55	4069.09	3365.27	3854.87	1.06491	0.4	0.691041	0.910415	0.4	0.503145
Q64237	Dbh	DOPO	249.669	156.442	180.904	182.241	142.333	168.804	103.544	68.2694	140.156	0.933114	0.7	0.870445	0.57237	0.1	0.178349
P31786	Dbi	ACBP	5856.22	4627.29	4724.68	5502.26	7021.22	5215.49	4594.74	4931.72	4665.24	1.16458	0.4	0.691041	0.987419	0.7	0.771399
Q9QXS6	Dbn1	DREB	2745.24	2513.42	2291.71	2490.22	2234.36	2218.93	1677.34	1529.7	1778.47	0.888972	0.2	0.528743	0.667354	0.1	0.178349
Q62418	Dbnl	DBNL	10043	8206.65	8158.59	8949.78	8081.59	11594.7	6060.59	6127.99	7342.62	1.09055	1	1	0.74671	0.1	0.178349
Q923B1	Dbr1	DBR1	659.985	678.296	547.53	571.47	520.61	606.272	578.779	437.755	636.895	0.865883	0.4	0.691041	0.876958	0.4	0.503145
P53395	Dbt	ODB2	6927.11	6876.58	6657.66	6259.58	5767.93	6974.46	6944.78	9811.22	8588.14	0.910275	0.7	0.870445	1.2489	0.1	0.178349
Q91VU6	Dcaf11	DCA11	572.139	760.846	687.142	826.73	724.548	696.297	900.953	822.781	835.601	1.05444	0.4	0.691041	1.21605	0.1	0.178349
Q6PAC3	Dcaf13	DCA13	1151.71	1270.78	1125.23	1599.49	1452.5	1408.28	1469.96	1685.14	1357.66	1.26117	0.1	0.408745	1.27633	0.1	0.178349
Q80T85	Dcaf5	DCAF5	170.04	176.741	149.037	202.678	174.98	157.737	155.873	172.359	137.174	1.02905	0.7	0.870445	0.916684	0.7	0.771399
Q9DC22	Dcaf6	DCAF6	151.946	153.912	188.653	188.763	154.534	177.621	158.849	187.464	170.238	1.15404	0.4	0.691041	1.10607	0.7	0.771399
P61963	Dcaf7	DCAF7	3449.16	2728.03	2871.98	2708.78	2748.65	3629.8	2276.63	2417.54	2462.11	0.957058	1	1	0.841768	0.1	0.178349
Q8N7N5	Dcaf8	DCAF8	1159.51	1235.28	1089.58	1217.56	1167.9	1157.75	1131.12	948.726	983.949	1.00724	1	1	0.84859	0.2	0.301331
Q8BHC4	Dcakd	DCAKD	520.448	702.426	650.807	533.99	593.517	661.115	584.331	375.802	647.91	0.911971	1	1	0.897856	0.4	0.503145
E9PVD3	Dchs1	PCD16	238.078	213.424	172.241	209.563	159.21	177.622	159.87	151.725	152.405	0.832249	0.4	0.691041	0.714095	0.1	0.178349
P43346	Dck	DCK	206.713	251.912	192.882	279.156	298.213	270.363	301.432	345.173	248.904	1.35045	0.1	0.408745	1.45822	0.2	0.301331
Q9JLM8	Dclk1	DCLK1	937.129	1053.38	840.37	987.056	993.253	1014.43	1075.42	968.381	987.672	1.05989	0.7	0.870445	1.05393	0.4	0.503145
Q6PGN3	Dclk2	DCLK2	192.39	212.526	177.666	186.36	166.105	149.093	160.343	147.505	163.075	0.863376	0.2	0.528743	0.833427	0.1	0.178349
P28654	Dcn	PGS2	9273.78	5904.16	6314.05	5329.6	5233.77	6243.79	3769.27	6060.25	5573.29	0.844086	0.2	0.528743	0.882681	0.2	0.301331
Q91YD3	Dcp1a	DCP1A	4824.33	3924.36	4063.64	4945.65	4966.99	4656.32	3343.05	3541.34	3452.85	1.21705	0.2	0.528743	0.849694	0.1	0.178349
Q3U564	Dcp1b	DCP1B	392.24	363.66	338.25	448.081	383.95	401.13	308.074	307.106	324.511	1.10304	0.2	0.528743	0.847148	0.1	0.178349
Q9CYC6	Dcp2	DCP2	379.365	347.727	305.971	423.753	344.299	309.814	367.173	378.55	374.043	0.990142	1	1	1.07568	0.7	0.771399
Q9DAR7	Dcps	DCPS	7542.12	6243.35	6316.48	6151.85	5739.46	5480.22	4819.75	5010.28	4655.2	0.908648	0.1	0.408745	0.763044	0.1	0.178349
Q8K2D6	Dctd	DCTD	127.79	112.078	88.4717	176.016	166.811	137.331	207.585	142.481	189.643	1.48835	0.1	0.408745	1.69206	0.1	0.178349
O08788	Dctn1	DCTN1	10797.9	11178	11502.5	11037	10433.3	11449.8	12285.1	11531.7	12442.4	0.987386	0.7	0.870445	1.09904	0.1	0.178349
Q99KJ8	Dctn2	DCTN2	13123.7	11088.4	11550.1	12794	12709.1	10592.5	10688.6	10406.3	11018.2	1.10034	1	1	0.925412	0.1	0.178349
Q9Z0Y1	Dctn3	DCTN3	3748.25	4877.01	4846.74	4113.13	4373.03	3733.18	6257.5	4606.37	5753.29	0.848638	0.4	0.691041	1.18704	0.4	0.503145
Q8CBY8-2	Dctn4	DCTN4	2363.75	2270.37	2392.23	2414.88	2673.94	2407.23	2061.2	2319.86	2061.69	1.02163	0.1	0.408745	0.872212	0.2	0.301331
Q9QZB9	Dctn5	DCTN5	1371.08	1291.86	1281.65	1615.8	1296.32	1538.29	1297.18	988.425	989.659	1.19076	0.2	0.528743	0.766073	0.4	0.503145
Q9WUB4	Dctn6	DCTN6	910.519	816.832	726.483	935.282	828.922	766.199	644.343	581.302	678.168	1.0148	0.7	0.870445	0.788832	0.1	0.178349
Q9QY93	Dctpp1	DCTP1	1509.49	1171.76	1116.83	1475.19	1342.54	1178.99	1021.89	974.215	964.37	1.14575	0.7	0.870445	0.831412	0.1	0.178349
Q9QZ73	Dcun1d1	DCNL1	1352.83	1629.36	1616.45	1250.36	1665.61	1468.55	1760.52	1482.03	1647.34	0.908503	1	1	1.01911	0.4	0.503145
Q8BZJ7	Dcun1d2	DCNL2	67.6036	84.0581	81.8896	81.787	80.6063	65.7482	99.0703	70.465	95.136	0.984329	0.4	0.691041	1.16176	0.4	0.503145
Q8K0V2	Dcun1d3	DCNL3	82.154	86.0425	81.3601	84.6205	98.9529	95.1302	95.8987	69.8093	75.1417	1.15795	0.2	0.528743	0.914644	0.7	0.771399
Q9CXV9	Dcun1d5	DCNL5	173.87	194.095	152.269	204.059	210.926	225.302	162.88	106.754	178.05	1.21313	0.1	0.408745	0.936792	0.7	0.771399
Q91X52	Dcxr	DCXR	5767.99	6194.17	5375.7	5547.08	4547.75	5213.03	4874.86	5486.12	4523.78	0.903786	0.2	0.528743	0.845157	0.2	0.301331
Q9D9Z5	Dda1	DDA1	945.736	852.669	797.405	837.127	844.566	917.64	695.619	651.774	777.264	0.990497	1	1	0.815814	0.1	0.178349
Q9CWS0	Ddah1	DDAH1	7104.35	5749.18	6048.66	8677.09	9177.74	7432.32	10455	9848.26	10555.8	1.43455	0.1	0.408745	1.72848	0.1	0.178349
Q99LD8	Ddah2	DDAH2	2983.44	2182.11	2541.48	2594.51	2467.38	2231.6	1998.14	1994.51	1914.86	0.970844	1	1	0.784783	0.1	0.178349
Q3U1J4	Ddb1	DDB1	9042.49	10986.7	10087.6	9064.29	9186.85	10599	10452.4	7913.3	8669.59	0.910707	1	1	0.85943	0.4	0.503145
O88533	Ddc	DDC	1154.86	1563.19	1754.74	1419.31	1682.22	1770.1	2500.41	2359.05	2089.24	1.07615	0.7	0.870445	1.50913	0.1	0.178349
D6RH62	Ddhd1	D6RH62	27.3569	26.9969	24.4245	24.5023	16.813	23.6941	16.7393	17.8492	15.184	0.87766	0.2	0.528743	0.620045	0.1	0.178349
Q80Y98	Ddhd2	DDHD2	651.909	646.417	642.312	702.69	622.557	595.707	616.679	628.792	650.307	0.963089	0.7	0.870445	0.972734	0.4	0.503145
A2ADY9	Ddi2	DDI2	2412.34	2267.06	2145.11	2858.68	2496.65	2320.74	2277.85	1881.41	2282.97	1.10127	0.2	0.528743	1.00476	1	1
O54734	Ddost	OST48	2916.12	3184.46	3161.05	3712.5	3123.26	2917.66	3434.1	4228.19	3327.24	0.988045	1	1	1.08638	0.1	0.178349
Q03146	Ddr1	DDR1	868.854	813.269	757.272	1012.34	1078.83	918.285	1309.38	1253.12	1222.26	1.24478	0.1	0.408745	1.54084	0.1	0.178349
Q62371	Ddr2	DDR2	503.669	582.844	563.175	466.814	437.266	435.228	430.275	437.37	400.09	0.77643	0.1	0.408745	0.764017	0.1	0.178349
Q80WW9	Ddrgk1	DDRGK	87.7112	126.714	87.4757	139.86	84.8858	93.4577	121.832	117.47	123.121	1.06552	1	1	1.38901	0.7	0.771399
O35215	Ddt	DOPD	4436.86	3837.33	3935.87	4753.22	4858.45	3409.04	3425.11	3153.97	3401.76	1.20767	0.7	0.870445	0.864297	0.1	0.178349
Q91VR5	Ddx1	DDX1	10760.6	12521.8	12562.9	11208.2	11787.4	12524	12829.6	11357.8	11970	0.94135	1	1	0.955933	1	1
Q80Y44	Ddx10	DDX10	148.071	164.677	168.582	192.137	192.778	169.542	190.502	148.996	178.277	1.16675	0.1	0.408745	1.08259	0.4	0.503145
Q501J6	Ddx17	DDX17	14453.9	13359.1	13536.4	14310.9	13665.1	13603.5	12673.9	14383.5	12600.3	1.00951	0.7	0.870445	0.936283	0.4	0.503145
Q8K363	Ddx18	DDX18	2412.8	2656.14	2862.84	3011.94	3090.53	2892.58	3278.28	3870.71	3469.29	1.13395	0.1	0.408745	1.30614	0.1	0.178349
Q61655	Ddx19a	DD19A	3406.32	4208.83	4232.25	3998.62	4099.56	4103.02	5373.48	5740.2	4910.87	0.974038	0.7	0.870445	1.27672	0.1	0.178349
Q8BZY3	Ddx19b	Q8BZY3	327.664	382.703	335.415	374.832	374.811	399.273	400.594	345.732	367.791	1.11752	0.4	0.691041	1.09652	0.4	0.503145
Q9JJY4	Ddx20	DDX20	1347.65	1433.86	1439.38	1325.48	1394.73	1403.47	1217.72	1259.89	1223.92	0.97271	0.4	0.691041	0.853584	0.1	0.178349
Q9JIK5	Ddx21	DDX21	4330.98	5553.32	5021.33	5760.41	5821.3	5388.97	8117.13	9019.81	7423.87	1.14719	0.2	0.528743	1.61653	0.1	0.178349
D3Z0M9	Ddx23	D3Z0M9	4910.91	5402.34	4916.57	5245.7	5348.97	5848.67	5184.38	5520.2	5226.71	1.08795	0.4	0.691041	1.06308	0.4	0.503145
Q9ESV0	Ddx24	DDX24	1161.22	1347.45	1298.14	1447.45	1679.42	1614.4	1611.19	1975.36	1562.43	1.24362	0.1	0.408745	1.24115	0.1	0.178349
Q921N6	Ddx27	DDX27	1807.13	1966.8	1961.89	2395.79	2456.26	2487.66	2654.23	3395.08	2513.68	1.25199	0.1	0.408745	1.35289	0.1	0.178349
Q9CWT6	Ddx28	DDX28	152.517	152.759	164.73	180.091	236.431	182.196	288.251	197.87	277.612	1.1927	0.1	0.408745	1.81732	0.1	0.178349
Q6NZQ2	Ddx31	Q6NZQ2	307.251	313.591	312.28	366.659	390.44	353.632	385.859	512.011	410.836	1.17413	0.1	0.408745	1.3156	0.1	0.178349
Q8VDW0	Ddx39a	DX39A	6245.19	7787.17	7595.92	6424.42	7215.31	7996.06	8093.54	6058.48	7212.47	0.949893	1	1	0.949519	1	1
Q9Z1N5	Ddx39b	DX39B	2585.58	3188.9	3124.04	2575.79	2966.76	3049.45	3160.19	2051.02	2798.01	0.949655	0.4	0.691041	0.895638	0.7	0.771399
Q62167	Ddx3x	DDX3X	1288.66	1477.3	1381.06	1718.91	1486.49	1479.26	1797.94	1700.44	1669.43	1.07634	0.1	0.408745	1.23126	0.1	0.178349
Q62095	Ddx3y	DDX3Y	10089.1	10721.3	10354.9	10589.3	10546.2	11088.3	12113.4	13152.5	12514.7	1.02264	0.4	0.691041	1.20858	0.1	0.178349
Q91VN6	Ddx41	DDX41	2573.17	2798.12	3000.8	3128.07	2929.32	2585.63	3146.68	3820.62	3348.53	1.04689	0.7	0.870445	1.19671	0.1	0.178349
Q810A7	Ddx42	DDX42	3792.08	4197.44	3949.51	4134.07	4452.67	4475.51	4151.63	4234.08	4082.97	1.1274	0.2	0.528743	1.05118	0.4	0.503145
Q569Z5	Ddx46	DDX46	6027.3	7774.05	6906.07	6832.77	7105.82	8092.67	8695.48	8413.63	8247.93	1.02892	0.7	0.870445	1.21829	0.1	0.178349
Q9CWX9	Ddx47	DDX47	599.971	677.637	741.516	673.002	726.113	894.154	840.703	1192.16	975.703	1.07154	0.7	0.870445	1.43986	0.1	0.178349
Q4FZF3	Ddx49	DDX49	382.544	356.578	315.295	491.677	319.076	321.223	348.73	493.136	348.249	0.900849	1	1	0.977991	1	1
Q61656	Ddx5	DDX5	10917.2	11288.2	10381.5	12350.1	12167.5	11615.9	12366.4	13278.8	12994.5	1.11453	0.1	0.408745	1.19028	0.1	0.178349
Q99MJ9	Ddx50	DDX50	774.291	912.421	905.234	1112.94	1054.26	1000.91	1325.97	1501.24	1231.94	1.16463	0.1	0.408745	1.46478	0.1	0.178349
Q6P9R1	Ddx51	DDX51	225.015	235.216	217.417	267.951	200.468	251.26	202.805	161.044	210.241	1.11664	0.7	0.870445	0.901295	0.1	0.178349
Q8K301	Ddx52	DDX52	81.5657	94.5972	86.7379	103.412	121.431	98.7271	98.4809	95.2604	105.567	1.19223	0.1	0.408745	1.13539	0.1	0.178349
Q8K4L0	Ddx54	DDX54	181.25	215.335	237.899	307.315	303.306	284.285	371.326	428.685	362.912	1.40853	0.1	0.408745	1.72441	0.1	0.178349
Q9D0R4	Ddx56	DDX56	771.011	727.538	691.704	991.484	902.04	867.13	871.199	1076.45	890.578	1.23985	0.1	0.408745	1.2241	0.1	0.178349
Q6Q899	Ddx58	DDX58	2873.86	3662.07	3699.84	2867.19	3108.28	3024.28	3820.96	3405.21	3481.41	0.825839	0.4	0.691041	0.950667	1	1
Q9DBN9	Ddx59	DDX59	259.448	275.922	248.639	251.891	237.113	229.853	215.321	169.114	225.262	0.913913	0.2	0.528743	0.82992	0.1	0.178349
P54823	Ddx6	DDX6	5149.14	6139.78	6262.39	4842.43	5721.63	6089.97	5881.86	6082.64	5040.64	0.931895	0.4	0.691041	0.957992	0.4	0.503145
E9PZQ1	Ddx60	E9PZQ1	463.287	688.49	699.25	733.856	1024.74	1042.18	1507.7	1104.21	1384.18	1.48839	0.1	0.408745	2.01046	0.1	0.178349
Q9CQ62	Decr1	DECR	3516.78	4085.65	3769.07	4588.3	4524.92	4370.8	4967.97	4812.13	4882.63	1.20054	0.1	0.408745	1.29545	0.1	0.178349
Q9WV68	Decr2	DECR2	277.493	368.57	351.181	286.445	404.5	364.432	440.656	396.456	477.844	1.03773	0.7	0.870445	1.25478	0.1	0.178349
O09005	Degs1	DEGS1	152.702	189.97	204.423	139.488	184.503	222.328	152.574	110.802	159.633	0.971222	1	1	0.803148	0.2	0.301331
Q8R2F2	Degs2	DEGS2	28.8803	36.1739	33.6035	29.2382	53.0496	60.1314	49.67	22.2333	47.9871	1.57869	0.4	0.691041	1.42804	0.7	0.771399
Q7TNV0	Dek	DEK	4112.33	4894.67	4751	2589.83	4571.35	4553.23	4330.75	3894.33	3097.71	0.958373	0.4	0.691041	0.819686	0.2	0.301331
Q8K382	Dennd1a	DEN1A	322.012	289.302	267.317	341.353	312.161	260.313	150.101	168.017	179.081	1.07901	1	1	0.580767	0.1	0.178349
Q91VV4-2	Dennd2d	DEN2D	29.8422	37.4847	40.1117	33.9713	41.6987	42.6975	54.0366	47.4984	52.8502	1.11242	0.4	0.691041	1.40991	0.1	0.178349
Q91VV4	Dennd2d	DEN2D	650.089	798.896	893.446	676.349	753.659	897.519	946.22	852.595	959.783	0.943376	1	1	1.18441	0.2	0.301331
A2RT67	Dennd3	DEND3	181.09	218.992	223.115	174.059	202.532	215.294	231.526	234.777	214.614	0.924837	0.4	0.691041	1.05723	0.4	0.503145
A6H8H2	Dennd4c	DEN4C	4903.59	5405.9	5219.51	5415.71	5160.85	5455.39	5277.91	4461.8	5230.21	1.03759	0.4	0.691041	1.00205	1	1
A2RSQ0	Dennd5b	DEN5B	228.412	319.489	262.241	241.021	243.442	221.723	347.733	384.927	327.675	0.919082	0.4	0.691041	1.32601	0.1	0.178349
Q8BH65	Dennd6a	DEN6A	381.899	484.874	423.635	339.825	412.622	403.47	382.371	346.206	412.789	0.9524	0.4	0.691041	0.902595	0.4	0.503145
Q9CQJ6	Denr	DENR	1659.82	1350.96	1453.59	1399.19	1618.08	1478.76	863.998	861.474	893.549	1.01732	1	1	0.594389	0.1	0.178349
Q570Y9	Deptor	DPTOR	1650.24	1976.24	1933.14	1764.62	1925.8	1949.86	2183.44	2120.39	2139.31	0.996203	1	1	1.10665	0.1	0.178349
Q91YP3	Dera	DEOC	1287.71	1691.99	1677.11	1559.4	1989.44	1974.88	2598.89	1910.23	2256.49	1.17755	0.4	0.691041	1.34546	0.1	0.178349
Q99J56	Derl1	DERL1	484.64	552.5	557.462	412.792	433.024	503.558	369.565	269.042	386.919	0.783754	0.2	0.528743	0.668896	0.1	0.178349
Q8BNI4	Derl2	DERL2	181.598	234.998	216.673	176.357	221.322	246.831	166.501	99.5243	198.655	1.02146	1	1	0.768444	0.2	0.301331
P31001	Des	DESM	60245.8	52983.5	58774.9	49344	49157.7	41750.3	36792.8	41989.1	38462.3	0.836372	0.1	0.408745	0.6544	0.1	0.178349
Q9CQT7	Desi1	DESI1	353.63	383.447	318.128	404.502	315.774	261.368	284.488	253.271	280.313	0.89295	0.7	0.870445	0.792673	0.1	0.178349
Q9D291	Desi2	DESI2	450.965	426.666	420.259	366.351	303.333	514.591	305.59	377.632	404.984	0.858636	0.7	0.870445	0.885076	0.1	0.178349
O54786	Dffa	DFFA	237.707	203.057	189.296	221.014	208.453	193.398	164.615	134.864	177.043	1.02657	1	1	0.810684	0.1	0.178349
O54786-2	Dffa	DFFA	700.527	616.195	588.549	756.867	705.007	610.155	509.705	447.675	508.33	1.14413	0.4	0.691041	0.82495	0.1	0.178349
O54788	Dffb	DFFB	85.9784	120.4	88.935	116.86	138.581	112.545	192.784	214.626	150.878	1.31399	0.4	0.691041	2.1677	0.1	0.178349
Q9Z2D3	Dfna5	DFNA5	1136.05	1350.65	1423.6	1276.42	1376.41	1268.51	2143.88	1946.2	1776.2	0.945041	1	1	1.44094	0.1	0.178349
Q9Z2A7	Dgat1	DGAT1	58.1053	65.6015	62.7517	68.8535	65.5998	75.908	48.3864	54.653	50.5387	1.09724	0.2	0.528743	0.805376	0.1	0.178349
O70279	Dgcr14	DGC14	1493.2	1258.52	1220.63	1470.96	1652.61	1502.37	1022.48	929.368	1047.65	1.19376	0.2	0.528743	0.812446	0.1	0.178349
P98154	Dgcr2	IDD	38.6355	31.1292	28.9583	40.2147	40.2021	35.4601	32.3936	35.6678	34.878	1.29146	0.2	0.528743	1.12043	0.7	0.771399
Q9EQM6	Dgcr8	DGCR8	332.373	326.081	316.515	373.984	384.459	372.672	286.455	368.367	297.304	1.14691	0.1	0.408745	0.911749	0.7	0.771399
O88673	Dgka	DGKA	955.161	1116	1124.03	1223.4	1440.03	1431.53	1879.56	1771.28	1772.96	1.28273	0.1	0.408745	1.58867	0.1	0.178349
E9PUQ8	Dgkd	E9PUQ8	192.061	224.964	218.929	214.048	261.451	205.787	259.631	269.906	225.745	0.977705	1	1	1.18591	0.1	0.178349
D3YXJ0	Dgkh	D3YXJ0	268.052	314.265	302.384	362.549	292.233	333.691	413.82	361.809	355.476	1.10353	0.4	0.691041	1.19652	0.1	0.178349
Q6P5E8	Dgkq	DGKQ	445.736	495.595	519.75	614.149	548.798	519.356	849.18	871.338	902.174	1.10735	0.2	0.528743	1.75816	0.1	0.178349
Q80UP3	Dgkz	DGKZ	887.716	942.591	842.017	1278.84	922.224	1062.26	1044.53	1058.01	889.229	1.19662	0.2	0.528743	1.17665	0.2	0.301331
Q9QX60	Dguok	DGUOK	83.494	80.6768	77.315	89.9293	109.983	84.4777	104.076	114.87	105.742	1.11469	0.1	0.408745	1.31069	0.1	0.178349
Q8VCH6	Dhcr24	DHC24	311.431	419.615	366.63	474.613	390.43	437.106	520.407	497.943	445.01	1.19223	0.2	0.528743	1.35816	0.1	0.178349
O88455	Dhcr7	DHCR7	350.819	362.053	369.553	354.193	401.719	472.86	478.279	262.108	405.687	1.10956	0.4	0.691041	1.12052	0.7	0.771399
Q9DBB8	Dhdh	DHDH	1896.2	1743.79	1588.65	1438.22	1164.94	1096.23	1052.98	1024.58	1111.02	0.668051	0.1	0.408745	0.603846	0.1	0.178349
P00375	Dhfr	DYR	3949.58	3940.9	3781.1	4281.85	4464.43	3849.33	3961.96	4274.79	4170.57	1.08652	0.4	0.691041	1.05828	0.1	0.178349
O35435	Dhodh	PYRD	3194.13	3247.06	2963.52	3218.44	3364.58	3023.77	3282.01	3521.86	3666.97	1.00761	0.7	0.870445	1.1026	0.1	0.178349
Q3TXU5	Dhps	DHYS	1165.84	925.833	1124.73	1135.51	1205.59	1194.51	1064.13	981.217	1179.7	1.06204	0.2	0.528743	0.94612	1	1
Q99L04	Dhrs1	DHRS1	4397.72	4156.21	3941.32	3810.61	3241.69	3703.99	3026.07	3373.64	3064.2	0.891194	0.1	0.408745	0.737258	0.1	0.178349
Q3U0B3	Dhrs11	DHR11	1672.95	1568.32	1679.49	1740.05	1815.38	1657.16	2371.84	2076.53	2254.66	1.04011	0.4	0.691041	1.34771	0.1	0.178349
Q5SS80	Dhrs13	DHR13	201.461	209.588	217.655	228.229	252.655	260.363	284.345	276.655	248.276	1.20548	0.1	0.408745	1.31999	0.1	0.178349
O88876	Dhrs3	DHRS3	515.113	611.244	656.661	570.046	559.158	636.278	763.883	765.504	716.235	0.9326	1	1	1.24972	0.1	0.178349
Q99LB2	Dhrs4	DHRS4	3108.6	4020.22	3826.54	3466.56	3439.92	3444.44	4737.43	3973.3	4654.17	0.900145	0.7	0.870445	1.21629	0.2	0.301331
Q9CXR1	Dhrs7	DHRS7	1448.55	1784.16	1849.58	1382.53	1564.04	1687.58	1443.51	1466.58	1580.97	0.876625	0.4	0.691041	0.822	0.4	0.503145
Q99J47	Dhrs7b	DRS7B	880.071	1296.15	1338.09	1092.16	1340.39	1229.19	2175.78	1843.5	1904.84	0.948339	1	1	1.46961	0.1	0.178349
Q58NB6	Dhrs9	DHRS9	238.756	237.145	282.967	466.941	719.36	522.069	889.806	1336.2	1075.69	2.18662	0.1	0.408745	4.5054	0.1	0.178349
Q8VBZ0	Dhrsx	DHRSX	152.489	236.521	200.099	157.909	185.894	222.25	235.25	240.858	242.021	0.92901	1	1	1.20369	0.2	0.301331
O35286	Dhx15	DHX15	5383.74	6823.42	6653.86	6530.21	7232.27	6648.25	8276.98	8622.8	7502.93	0.999157	1	1	1.24394	0.1	0.178349
G3X8X0	Dhx16	G3X8X0	1187.95	1226.45	1071.09	1235.29	1125.29	1172.67	1029.51	836.249	948.876	0.987138	1	1	0.798751	0.1	0.178349
Q6PGC1	Dhx29	DHX29	1615.37	1877.02	1882.99	1935.79	2006.5	1858.04	2464.43	3087.87	2381.06	1.03131	0.4	0.691041	1.31295	0.1	0.178349
Q99PU8	Dhx30	DHX30	3379.21	3410.17	3442.92	3597.76	3573.4	3497.55	4059.68	4513.36	4058.41	1.04787	0.1	0.408745	1.19046	0.1	0.178349
Q8BZS9	Dhx32	DHX32	2841.62	3223.07	3430.39	3824.3	3571.74	3483.32	4917.19	4971.73	4103.61	1.10818	0.1	0.408745	1.52562	0.1	0.178349
Q9DBV3	Dhx34	DHX34	89.932	73.5289	87.8921	84.4989	86.3784	112.003	64.5383	96.0719	83.3125	0.982778	1	1	0.947895	1	1
A2ACQ1	Dhx35	A2ACQ1	208.975	592.113	217.192	410.195	233.005	651.583	220.838	314.035	214.861	1.88863	0.4	0.691041	1.01679	1	1
Q8VHK9	Dhx36	DHX36	1223.32	1407.63	1364.76	1698.45	1468	1491.91	1591.33	1660.82	1519.71	1.09317	0.1	0.408745	1.16602	0.1	0.178349
Q6NZL1	Dhx37	Q6NZL1	428.731	380.581	415.816	397.67	395.064	324.711	435.241	522.917	398.274	0.950093	0.4	0.691041	1.04672	0.4	0.503145
Q80X98	Dhx38	Q80X98	2144.43	2115.44	2086.46	2627.03	2321.47	2486.15	2587.14	2689.14	2779.12	1.17524	0.1	0.408745	1.2712	0.1	0.178349
Q6P5D3	Dhx57	DHX57	49.7508	54.9447	57.532	45.4284	66.9745	49.6292	57.1753	54.1325	52.3658	0.903257	0.7	0.870445	0.985218	1	1
Q99J87	Dhx58	DHX58	421.381	477.441	642.37	492.511	655.159	602.025	784.28	753.896	775.072	1.26094	0.4	0.691041	1.62339	0.1	0.178349
A2A4P0	Dhx8	DHX8	1290.75	1418.47	1371.88	1528	1387.26	1439.04	1992.09	1907.15	1835.42	1.04896	0.2	0.528743	1.39017	0.1	0.178349
E9QNN1	Dhx9	E9QNN1	8091.07	8809.58	9014.41	7690.4	8974.25	9025.2	9303.52	10016.4	9052.39	1.01869	1	1	1.05607	0.1	0.178349
Q9JIQ3	Diablo	DBLOH	44.2384	50.2395	46.9079	46.204	63.0132	45.0597	56.5837	40.2647	51.7294	0.984994	1	1	1.10279	0.7	0.771399
O08808	Diaph1	DIAP1	7256.36	8576.35	8119.83	7906.05	8552.3	9473.08	9943.24	11455.4	10290.3	1.05326	0.7	0.870445	1.2673	0.1	0.178349
O70566	Diaph2	DIAP2	1704.17	1936.86	1983.7	1648.65	1866.42	1788.32	2171.49	2189.85	2060.79	0.923309	0.4	0.691041	1.12114	0.1	0.178349
Q9Z207	Diaph3	DIAP3	141.868	183.187	192.306	186.691	185.149	214.751	184.153	176.775	173.878	1.01913	0.4	0.691041	0.964998	1	1
F8VQ54	Dicer1	F8VQ54	1680.82	1686.05	1675.49	2049.04	1794.38	1915.03	1993.25	1985.59	1958.95	1.13934	0.1	0.408745	1.18132	0.1	0.178349
Q8C9B9	Dido1	DIDO1	3385.37	3406.37	3244.82	3849.26	3808.08	3539.33	3075.74	2538.72	3034.46	1.12486	0.1	0.408745	0.896345	0.1	0.178349
Q9D0D4	Dimt1	DIM1	155.148	203.038	217.175	207.902	233.047	223.041	225.127	271.228	231.506	1.09852	0.2	0.528743	1.14021	0.1	0.178349
Q8BWT5	Dip2a	DIP2A	361.281	440.505	407.637	356.154	391.523	453.989	477.29	428.21	399.149	0.96047	1	1	1.05047	0.7	0.771399
Q3UH60	Dip2b	DIP2B	2799.77	2845.24	2869.9	2602.25	2892.18	2984.09	2429.47	2805.67	2604.3	1.0165	0.7	0.870445	0.915318	0.2	0.301331
B2RQ71	Dip2c	B2RQ71	1129.37	1295.87	1199.54	990.025	1074.81	1267.98	894.784	781.805	925.336	0.896018	0.4	0.691041	0.745939	0.1	0.178349
Q5PR73	Diras2	DIRA2	261.627	416.616	265.856	582.31	371.24	470.648	892.892	1084.78	1069.73	1.77031	0.2	0.528743	4.02372	0.1	0.178349
Q9CSH3	Dis3	RRP44	1892.25	2335.02	2213.88	2439.47	2296.42	2175.63	3256.98	3639.26	3105.87	1.03728	0.7	0.870445	1.47116	0.1	0.178349
Q8C0S1	Dis3l	DI3L1	984.934	1218.91	1166.7	1225.04	1303.85	1283.86	1642.57	1894.31	1512.91	1.10042	0.1	0.408745	1.40788	0.1	0.178349
Q8CI75	Dis3l2	DI3L2	2101.06	2207.99	2215.21	2474.52	2167.75	2224.74	2523.03	2408.04	2386.17	1.00759	0.4	0.691041	1.0906	0.1	0.178349
Q9ESX5	Dkc1	DKC1	1433.29	1889.59	1788.05	1412.76	1667.11	1773.61	1619.66	1569.47	1964.3	0.932362	0.4	0.691041	0.905825	1	1
Q8BMF4	Dlat	ODP2	10106.8	8720.24	9139.4	9577.12	8149.92	7976.45	7627.28	7053.48	7849.82	0.891735	0.4	0.691041	0.834549	0.1	0.178349
O08749	Dld	DLDH	9145.25	8905.05	9000	8292.05	8100.4	8613.1	8635.04	7489.07	8577.28	0.921339	0.1	0.408745	0.953031	0.1	0.178349
Q811D0	Dlg1	DLG1	7374.69	6472.13	7135.66	7407.59	7830.47	6930.67	6454.87	6608.17	6243.85	1.03811	0.4	0.691041	0.904593	0.2	0.301331
Q91XM9	Dlg2	DLG2	1889.98	1680.76	1608.22	1537.83	1450.45	1147.59	1097.38	1230.59	1259.56	0.862973	0.1	0.408745	0.732163	0.1	0.178349
P70175	Dlg3	DLG3	1207.6	1047.25	1088.76	1255.13	1568.13	1479.6	1314.27	1558.58	1273.14	1.35898	0.1	0.408745	1.20713	0.1	0.178349
Q62108	Dlg4	DLG4	697.172	609.42	683.198	688.902	722.951	668.841	599.44	762.272	627.896	1.00835	0.7	0.870445	0.919054	1	1
B1AZP2	Dlgap4	DLGP4	1472.78	1244.92	1366.56	1454.16	1438.23	1204.58	1234.76	1534.65	1230.16	1.05245	1	1	0.903553	0.7	0.771399
Q8K4R9	Dlgap5	DLGP5	216.354	246.407	254.627	298.706	292.645	312.544	206.286	186.197	206.807	1.21225	0.1	0.408745	0.837176	0.1	0.178349
Q09163	Dlk1	DLK1	552.341	397.089	502.478	410.975	435.235	317.472	276.071	327.427	270.838	0.817897	0.4	0.691041	0.549419	0.1	0.178349
Q9D2G2	Dlst	ODO2	5573.54	5388.17	5028.08	5282.21	5331.62	4980.5	5060.18	4345.25	5497.6	0.980335	0.4	0.691041	0.939128	0.7	0.771399
Q9JI44	Dmap1	DMAP1	768.38	836.574	731.322	872.054	914.455	854.373	825.655	822.154	824.068	1.13492	0.1	0.408745	1.07248	0.7	0.771399
Q60997	Dmbt1	DMBT1	5734.99	5010.25	4411.45	6918.51	5864.48	7107.89	4631.4	4719.59	4498.39	1.38087	0.1	0.408745	0.924385	0.7	0.771399
P11531	Dmd	DMD	14838.2	16731.3	17142.3	11741.1	11128.6	12656.8	12552.6	13791	13285	0.701745	0.1	0.408745	0.794021	0.1	0.178349
P54265	Dmpk	DMPK	49.1847	61.6227	55.1834	37.6199	46.4586	40.7535	44.2852	27.5766	38.3671	0.73851	0.1	0.408745	0.695265	0.1	0.178349
P54265-3	Dmpk	DMPK	1015.69	1066.88	1019.73	899.033	788.04	866.434	740.567	702.107	670.51	0.84967	0.1	0.408745	0.688522	0.1	0.178349
Q8CE22	Dmtf1	DMTF1	35.0935	42.2279	41.8356	33.5717	32.6165	38.4395	40.1221	25.1776	42.0046	0.802467	0.2	0.528743	0.959042	0.7	0.771399
Q9WV69	Dmtn	DEMA	1041.52	884.726	815.7	920.569	988.473	906.442	469.092	472.182	501.634	1.04051	0.7	0.870445	0.533704	0.1	0.178349
Q6PNC0	Dmxl1	DMXL1	1005.08	1260.23	1100.41	1372.77	1122.17	1211.36	1373.21	1442.23	1254.95	1.10083	0.4	0.691041	1.24791	0.2	0.301331
P63037	Dnaja1	DNJA1	7340.43	6301.65	6651.84	7022.71	6514.28	5336.39	5727.87	6864.33	6228.14	0.97932	0.7	0.870445	0.936303	0.4	0.503145
Q9QYJ0	Dnaja2	DNJA2	17871.8	15403.8	15880.9	18518.5	18374.8	16290.7	16021.2	17764.4	17875.6	1.15704	0.2	0.528743	1.1186	0.4	0.503145
Q99M87-2	Dnaja3	DNJA3	1748.33	1585.82	1662.62	1823.8	2085.44	1862.33	1605.09	1525.88	1620.14	1.12012	0.1	0.408745	0.965398	0.4	0.503145
Q99M87	Dnaja3	DNJA3	36.9041	25.4805	35.4636	33.8581	34.3423	36.0329	25.4951	14.8869	21.8259	0.968382	1	1	0.615445	0.2	0.301331
Q9JMC3	Dnaja4	DNJA4	4531.74	4188.13	4519.78	2853.47	3207.12	3049.2	2860.98	2959.23	3192.54	0.674635	0.1	0.408745	0.654729	0.1	0.178349
Q9QYJ3	Dnajb1	DNJB1	2274.81	1951.63	2190.19	2295.44	2407.2	2126.13	1797.75	2121.46	2062.75	1.04805	0.4	0.691041	0.941813	0.4	0.503145
Q99KV1	Dnajb11	DJB11	5852.48	5735.92	5992.99	6067.6	5427.75	4874.62	4752.02	4761.47	4929.14	0.927427	0.7	0.870445	0.813582	0.1	0.178349
Q9QYI4	Dnajb12	DJB12	389.04	436.848	439.618	434.196	499.185	399.977	526.834	662.373	526.506	0.993929	1	1	1.20599	0.1	0.178349
Q149L6	Dnajb14	DJB14	127.334	176.183	168.019	141.677	141.627	150.353	189.079	176.084	200.248	0.84322	0.7	0.870445	1.12534	0.2	0.301331
Q9QYI5	Dnajb2	DNJB2	1567.86	1499.88	1404.7	1706.17	1665.67	1233	1622.4	1478.19	1514.74	1.11054	0.7	0.870445	1.00991	0.7	0.771399
Q9D832	Dnajb4	DNJB4	5597.88	5006.42	5396.73	4796.09	4936.25	4112.57	4064.06	5745.68	4371.37	0.888703	0.1	0.408745	0.810003	0.7	0.771399
O89114	Dnajb5	DNJB5	1711.94	1851.72	1604.28	1786.48	1603.94	1470.17	1547.19	1849.05	1582.65	0.936914	0.4	0.691041	0.924477	0.4	0.503145
O54946	Dnajb6	DNJB6	610.414	621.361	582.769	845.624	662.23	516.86	909.118	1154.86	938.566	1.08489	0.7	0.870445	1.53759	0.1	0.178349
Q9QYI6	Dnajb9	DNJB9	97.5934	86.593	71.74	96.4775	104.156	66.3004	63.9939	68.1551	68.3882	1.11415	1	1	0.787074	0.1	0.178349
Q61712	Dnajc1	DNJC1	2683.18	2663.42	2841.52	2781.29	2669.63	2320.04	2503.24	2869.51	2689.35	0.99495	0.7	0.870445	1.0023	1	1
Q9DC23	Dnajc10	DJC10	1819.66	2514.61	2186.85	2248.13	2129.56	1983.45	2758.8	2838.59	2711.91	0.973803	1	1	1.26154	0.1	0.178349
Q5U458	Dnajc11	DJC11	2010.7	2338.93	2430.17	2447.22	2279.65	2362.17	2676.8	3094.17	2680.46	1.00994	0.7	0.870445	1.14602	0.1	0.178349
G3X922	Dnajc13	G3X922	4762.1	5963.22	6275.78	5189.77	5758.08	6115.93	7396.52	6305.94	7013.86	0.965599	1	1	1.17619	0.1	0.178349
Q921R4	Dnajc14	DJC14	123.696	147.782	150.573	150.978	119.942	107.565	152.706	163.047	158.325	0.811614	0.7	0.870445	1.07134	0.1	0.178349
Q80TN4	Dnajc16	DJC16	302.618	453.741	411.272	303.196	385.93	444.394	442.395	358.673	475.22	0.938381	1	1	1.07567	0.7	0.771399
Q91WT4	Dnajc17	DJC17	896.542	877.912	798.751	840.179	958.352	952.377	733.46	656.295	759.933	1.08482	0.4	0.691041	0.83546	0.1	0.178349
Q9CQV7	Dnajc19	TIM14	709.093	743.902	681.968	705.962	885.044	829.343	781.5	690.095	818.043	1.16958	0.4	0.691041	1.10211	0.4	0.503145
P54103	Dnajc2	DNJC2	2419.2	2230.42	2138.3	2486.14	2663.43	2544.08	2011.81	2207.61	2091.71	1.14063	0.1	0.408745	0.93781	0.2	0.301331
E9Q8D0	Dnajc21	E9Q8D0	122.622	132.985	134.316	162.695	186.842	169.992	151.926	134.165	146.481	1.27828	0.1	0.408745	1.10149	0.2	0.301331
Q8CHS2	Dnajc22	DJC22	18.3324	19.8402	23.9627	23.1708	24.9441	28.0917	23.5541	16.0152	19.8286	1.25725	0.2	0.528743	0.999415	0.7	0.771399
Q91ZF0	Dnajc24	DJC24	1742.79	1416.59	1375.1	1551.48	1517.98	1326.1	1035.62	917.631	1091.09	1.07157	1	1	0.731065	0.1	0.178349
A2ALW5	Dnajc25	DJC25	174.059	254.411	251.674	166.383	213.321	225.311	218.113	140.869	233.213	0.847608	0.4	0.691041	0.866649	0.4	0.503145
Q8VCE1	Dnajc28	DJC28	62.939	72.7592	67.0249	50.7657	52.5084	48.1155	64.5856	38.6553	62.8198	0.757416	0.1	0.408745	0.937261	0.2	0.301331
Q91YW3	Dnajc3	DNJC3	7237.03	8606.07	8715.94	6548.79	6570.64	6872.13	6299.07	6673.98	6483.27	0.763489	0.1	0.408745	0.753337	0.1	0.178349
Q9D844	Dnajc4	DNJC4	32.1165	37.9081	29.903	32.743	45.0233	45.7382	41.7198	37.0653	39.8695	1.40187	0.2	0.528743	1.2414	0.2	0.301331
P60904	Dnajc5	DNJC5	411.507	456.529	452.853	373.487	468.815	503.556	449.596	337.386	476.026	1.03525	0.7	0.870445	0.992808	1	1
Q9QYI3	Dnajc7	DNJC7	4686.46	5151.64	5211.25	4965.99	5343.03	5072.36	4741.61	3517.36	4207.54	0.984611	1	1	0.816738	0.2	0.301331
Q6NZB0	Dnajc8	DNJC8	2412.55	2116.67	2143.81	2431.96	2361.55	2419.37	1993.19	2063.1	2094.12	1.12854	0.2	0.528743	0.962352	0.1	0.178349
Q91WN1	Dnajc9	DNJC9	5039.97	4237.5	4429.75	4467.39	4582.66	4030.3	2747.06	3085.18	3213.89	1.0085	1	1	0.696468	0.1	0.178349
Q05A62	Dnal1	DNAL1	221.472	220.173	190.849	43.0749	188.329	182.472	213.521	156.601	35.771	0.828766	0.1	0.408745	0.711263	0.2	0.301331
Q9DCM4	Dnal4	DNAL4	100.125	115.675	107.556	120.484	128.324	110.281	94.458	75.6751	89.7267	1.1202	0.2	0.528743	0.834232	0.1	0.178349
P56542	Dnase2	DNS2A	717.486	589.196	551.665	635.737	504.357	488.121	440.054	580.797	449.029	0.856009	0.4	0.691041	0.762105	0.2	0.301331
[truncated: 6,602 more rows]

## Sheet: Table S3
Table S3: Phosphopeptide quantification from colons expressing WT or mutant K-Ras.
Accession Number	Gene	Protein	Site	Type	Peptide Sequence	WT_1	WT_2	WT_3	A146T_1	A146T_2	A146T_3	G12D_1	G12D_2	G12D_3	FC A146T:WT	p value A146T:WT	FDR value A146T:WT	FC G12D:WT	p value G12D:WT	FDR value G12D:WT
Q9WV66	March7	MARH7	545	single	K.ESLLLEDS#DDEEEGDLCR.I	134.163	133.798	172.333	136.341	107.774	126.043	147.632	148.08	135.529	0.939472	0.4	0.742218	1.10039	0.7	0.80192
P42209	Sept1	SEPT1	206	single	K.EEEINIYQFPECDS#DEDEEFKK.Q	1482.43	1312.02	1770.09	1305.64	820.594	792.539	655.906	530.519	576.759	0.553546	0.1	0.449082	0.389063	0.1	0.218592
P42209	Sept1	SEPT1	247	single	R.RYS#WGTVEVENPHHCDFLNLR.R	792.877	1025.05	1093.71	725.663	475.983	448.287	509.962	496.862	494.375	0.464352	0.1	0.449082	0.484721	0.1	0.218592
P42208	Sept2	SEPT2	218	single	K.IYHLPDAES#DEDEDFK.E	5203.56	6076.98	6630.99	4967.75	4864.26	4651.15	5294.58	6017.11	5742.89	0.800441	0.1	0.449082	0.945025	0.7	0.80192
P28661	Sept4	SEPT4	68	single	R.VARPQILEPRPQS#PDLCDDDVEFR.G	143.382	161.328	145.576	177.465	180.922	175.653	117.147	84.6455	106.59	1.21906	0.1	0.449082	0.732194	0.1	0.218592
P28661	Sept4	SEPT4	325	single	K.IYQFPDCDS#DEDEDFK.L	1544.2	1533.97	1745.14	1601	1291.66	1260	2265.28	2150.4	1704.06	0.83646	0.4	0.742218	1.39257	0.2	0.344665
P28661	Sept4	SEPT4	434	single	K.LTRESGT#DFPIPAVPPGTDPETEK.L	103.615	123.926	68.5222	155.184	384.164	240.601	73.336	90.826	101.124	2.32207	0.1	0.449082	0.876573	0.7	0.80192
P28661	Sept4	SEPT4	118	single	K.LDPYDS#S#EDDK.E	763.55	889.137	828.675	887.288	789.796	656.997	1035.13	928.54	1455.38	0.953084	0.7	0.902214	1.24914	0.1	0.218592
Q9Z2Q6	Sept5	SEPT5	225	single	K.FGIHVYQFPECDS#DEDEDFK.Q	1063.84	1363.51	1431.96	1450.15	964.555	999.246	2082.63	1519.55	1582.7	0.732847	0.7	0.902214	1.16075	0.1	0.218592
Q9R1T4	Sept6	SEPT6	418	single	K.AAAELLQSQGSQAGGSQT#LK.R	399.528	602.829	492.165	461.21	361.575	461.624	238.395	312.291	319.047	0.937104	0.4	0.742218	0.634524	0.1	0.218592
O55131	Sept7	SEPT7	333	single	K.S#PLAQMEEERR.E	969.567	967.823	1130.59	1104.54	805.437	772.361	1136.6	1409.82	1178.5	0.830718	0.4	0.742218	1.21549	0.1	0.218592
O55131	Sept7	SEPT7	227	single	K.IYEFPET#DDEEENK.L	482.771	573.243	483.93	542.512	412.903	423.506	376.767	615.035	501.394	0.875137	0.4	0.742218	1.03609	1	1
Q8CHH9	Sept8	SEPT8	18	single	R.S#LSLGGHVGFDSLPDQLVSK.S	21.0221	56.1899	42.031	41.4304	35.7402	28.1933	27.0607	32.7279	25.6062	0.85033	0.7	0.902214	0.643828	0.7	0.80192
Q80UG5	Sept9	SEPT9	330	single	K.SVQPTS#EERIPK.T	279.02	311.64	291.169	286.554	292.864	297.23	324.429	364.553	332.663	1.00582	1	1	1.14251	0.1	0.218592
Q80UG5	Sept9	SEPT9	30	single	K.RS#FEVEEIEPPNSTPPR.R	807.369	958.346	1056.93	1563.37	1399.02	1103.54	1020.08	1702.3	1200.76	1.45983	0.1	0.449082	1.25295	0.2	0.344665
Q8C1B7	Sept11	SEP11	84	single	K.ARS#YELQESNVR.L	103.018	98.4131	106.465	104.25	87.9823	87.0526	90.4396	87.9749	101.512	0.854046	0.4	0.742218	0.877899	0.2	0.344665
E9Q3M9	2010300C02Rik	E9Q3M9	570	single	R.DMS#PSEGDVAPPK.K	1194.57	994.293	1295.19	866.447	1108.62	1072.87	473.48	330.015	475.375	0.898126	0.4	0.742218	0.396362	0.1	0.218592
E9Q3M9	2010300C02Rik	E9Q3M9	507	single	R.DMS#PPEGDVAPPK.K	54.7873	51.963	53.2873	51.1728	42.058	35.5528	25.4803	16.6179	19.2823	0.78927	0.1	0.449082	0.361856	0.1	0.218592
E9Q3M9	2010300C02Rik	E9Q3M9	614	single	R.DLSPS#EGDVAPPK.R	1063.69	847.581	1190.83	829.635	857.357	850.552	508.781	537.978	689.316	0.79962	0.4	0.742218	0.505763	0.1	0.218592
E9Q3M9	2010300C02Rik	E9Q3M9	675	single	K.GDTPPPETITDTNLETPS#DTERQDQSVQK.E	337.183	312.367	279.197	461.153	481.236	442.168	203.978	225.512	211.375	1.47632	0.1	0.449082	0.676688	0.1	0.218592
E9Q3M9	2010300C02Rik	E9Q3M9	154	single	K.RAEETGMSS#EDDGLPR.S	440.481	413.802	422.655	455.068	474.964	435.708	320.135	255.843	349.611	1.07669	0.2	0.571462	0.757438	0.1	0.218592
E9Q3M9	2010300C02Rik	E9Q3M9	75	single	K.SEVIAVEESGPVYDS#EDELEESR.G	362.957	386.985	436.816	400.115	368.043	354.7	305.242	226.748	392.16	0.951051	0.7	0.902214	0.788771	0.4	0.557775
E9Q3M9	2010300C02Rik	E9Q3M9	47	single	K.ESPS#PTGNSAWK.Q	331.375	310.82	395.146	351.75	377.614	371.319	289.705	266.702	361.373	1.12054	0.7	0.902214	0.87425	0.4	0.557775
E9Q3M9	2010300C02Rik	E9Q3M9	959	single	K.T#RSPEQPGTKPPLPR.K	201.667	227.326	266.957	257.727	251.362	231.995	234.765	312.021	283.984	1.10573	0.7	0.902214	1.24924	0.2	0.344665
E9Q3M9	2010300C02Rik	E9Q3M9	189	single	K.ILVSSSRPQS#PDHMS#DASISSR.T	44.6146	107.629	92.5337	161.111	88.1843	103.791	109.868	109.637	101.015	1.12165	0.7	0.902214	1.18484	0.2	0.344665
E9Q3M9	2010300C02Rik	E9Q3M9	712	single	K.EEELTLVVVPRPEGVGTESSTAPAPS#PPVPK.S	151.703	116.333	138.12	147.508	156.889	144.843	135.688	149.35	135.16	1.06797	0.4	0.742218	0.982391	1	1
E9Q3M9	2010300C02Rik	E9Q3M9	113	single	R.VFS#QENVCDR.I	971.292	1025.71	1198.55	1164.59	872.648	904.343	1198	1185.79	1023.83	0.881672	0.4	0.742218	1.15606	1	1
E9Q3M9	2010300C02Rik	E9Q3M9	665	single	K.GDTPPPET#ITDTNLETPSDT#ERQDQSVQK.E	121.203	92.0072	94.9306	103.847	86.5441	87.4439	106.015	109.384	93.7662	0.921135	0.4	0.742218	1.11677	1	1
Q9D809	2200002D01Rik	Q9D809	61	single	R.VSGSSSDSSSSSSSS#DS#EAEGK.E	32.8719	179.192	56.0629	65.4461	182.518	46.9958	331.888	206.552	300.506	1.16737	0.7	0.902214	5.36016	0.1	0.218592
Q9D809	2200002D01Rik	Q9D809	63	single	R.VSGSSSDSSSSSSSSDS#EAEGK.E	60.1994	104.031	57.1442	91.8251	93.0212	47.8937	112.774	80.0032	140.285	1.52535	1	1	1.87334	0.2	0.344665
Q9D6L6	2310079G19Rik	Q9D6L6	46	single	K.DAPCSPT#SSQGSNTPR.D	41.5662	13.8154	18.3449	27.1552	23.4374	30.5874	11.6824	17.3586	10.5602	1.48026	0.7	0.902214	0.636817	0.2	0.344665
Q8C5X1	4931406P16Rik	Q8C5X1	662	single	R.RNS#TATAMVTEQK.T	835.74	898.502	674.016	1651.91	1768.09	1551.1	320.702	362.66	442.544	1.97658	0.1	0.449082	0.433938	0.1	0.218592
Q8C5X1	4931406P16Rik	Q8C5X1	934	single	K.HS#SGEQETSTLPSPPLLTTVEDVNQDNK.T	66.9775	88.2018	103.495	121.14	79.9634	82.4288	83.3854	86.6899	86.0027	0.934548	1	1	0.975067	0.7	0.80192
D3Z623	9330159F19Rik	D3Z623	204	single	K.S#DPVLQEMPK.A	1798.3	1308.08	1786.81	1069.54	966.908	1356.59	327.289	311.916	441.106	0.598574	0.2	0.571462	0.183169	0.1	0.218592
D3Z623	9330159F19Rik	D3Z623	468	single	K.S#PDNLNSCDISTAQK.A	220.218	170.845	204.852	124.49	132.381	165.865	71.2188	39.168	70.7156	0.646225	0.1	0.449082	0.345203	0.1	0.218592
D3Z623	9330159F19Rik	D3Z623	273	single	R.GETPPT#PPPR.S	73.9466	75.9851	58.6688	60.2646	35.3997	56.3921	17.5492	13.9873	32.6381	0.762605	0.2	0.571462	0.237322	0.1	0.218592
Q3UTB2	A630001G21Rik	Q3UTB2	115	single	K.SLGTELQDGYS#PQK.C	282.972	294.287	327.722	254.877	251.636	223.154	116.498	188.728	164.616	0.855069	0.1	0.449082	0.559374	0.1	0.218592
Q8R2R3	Aagab	AAGAB	311	single	K.AFWMAIGGDRDEIEGLS#SDDEH.-	63.3564	87.9127	81.9414	90.5527	68.3825	64.3775	126.939	150.155	103.492	0.834529	1	1	1.54914	0.1	0.218592
Q8R2R3	Aagab	AAGAB	211	single	R.VASAESCHSEQQEPS#PTAER.T	81.0436	115.965	116.092	184.037	137.023	159.581	121.202	90.8343	73.5985	1.37611	0.1	0.449082	0.78329	1	1
Q3UHJ0	Aak1	AAK1	650	single	K.S#TQLLQAAAAEASLNK.S	868.801	691.631	487.37	1026.75	1274.49	1029.24	135.579	221.187	297.711	1.48813	0.1	0.449082	0.319805	0.1	0.218592
Q3UHJ0	Aak1	AAK1	635	single	R.RILS#DVTHSAVFGVPASK.S	476.031	671.814	467.858	911.919	967	911.355	293.108	564.457	511.369	1.91567	0.1	0.449082	1.07424	1	1
Q3UHJ0	Aak1	AAK1	604	single	K.VQTT#PPPTIQGQK.V	1473.49	1232.03	1177.7	1366.06	1319.23	1088.81	805.946	625.178	1019.43	1.07078	1	1	0.65416	0.1	0.218592
Q3UHJ0	Aak1	AAK1	679	single	R.T#SQQNVSNASEGSTWNPFDDDNFSK.L	10.1308	11.0554	14.1905	7.9422	6.71616	9.69573	10.9351	13.2918	13.4095	0.718398	0.1	0.449082	1.20228	1	1
Q3UHJ0	Aak1	AAK1	21	single	R.REQGSSGLGSGSS#GGGGSSSGLGSGYIGR.V	93.8157	175.092	201.935	171.929	134.898	151.152	198.971	180.881	214.335	0.863269	0.7	0.902214	1.13638	0.4	0.557775
Q3UHJ0	Aak1	AAK1	618	single	K.VGSLT#PPSS#PK.T	62.3594	66.9839	58.5951	56.648	52.3864	54.7343	77.7074	39.6465	75.0126	0.877723	0.1	0.449082	1.20291	0.7	0.80192
Q8R0P4	Aamdc	AAMDC	46	single	R.ETGTEHS#PGVQPADVK.E	941.333	953.349	1166.31	1123.19	798.974	624.606	928.688	1097.76	948.747	0.838071	0.4	0.742218	0.995173	0.7	0.80192
Q3THG9	Aarsd1	AASD1	174	single	R.ELS#LDDPEVEQVR.G	291.637	258.256	287.673	219.808	244.857	222.991	186.956	85.027	213.51	0.775152	0.1	0.449082	0.64989	0.1	0.218592
Q3THG9	Aarsd1	AASD1	409	single	R.AEAQALLQDYVSTQS#AEE.-	401.474	419.67	452.412	368.866	357.999	340.245	333.68	272.942	420.25	0.853049	0.1	0.449082	0.795101	0.4	0.557775
Q3THG9	Aarsd1	AASD1	88	single	R.RGAQADHFTESPLS#PGSQVQVR.V	99.0744	135.72	99.3774	128.049	132.923	109.032	121.778	123.73	97.6831	1.28852	0.7	0.902214	1.22541	1	1
P41233	Abca1	ABCA1	1296	single	K.QSCLHPFTEDDAVDPNDS#DIDPESR.E	78.5176	161.604	162.042	107.84	65.9828	97.1153	106.794	79.4446	83.8137	0.600946	0.4	0.742218	0.518636	0.7	0.80192
P41234	Abca2	ABCA2	1327	single	K.VSEEDQS#LENSEADVK.E	81.1693	106.859	175.534	87.5806	84.5847	69.9481	232.723	253.264	235.823	0.791552	0.4	0.742218	2.20685	0.1	0.218592
O35379	Abcc1	MRP1	882	single	R.TYANAEQDLASEDDS#VSGSGK.E	138.769	186.427	184.777	137.451	131.005	130.604	183.217	212.618	227.138	0.708988	0.1	0.449082	1.15067	0.4	0.557775
O35379	Abcc1	MRP1	878	single	R.TYANAEQDLAS#EDDS#VSGSGK.E	65.447	71.5587	102.212	54.9842	76.0159	67.742	95.3879	167.333	104.65	0.946663	0.7	0.902214	1.46243	0.2	0.344665
O35379	Abcc1	MRP1	886	single	R.TYANAEQDLASEDDSVSGS#GK.E	210.301	177.784	242.753	232.232	112.294	200.884	255.04	302.194	270.074	0.955224	0.7	0.902214	1.28422	0.1	0.218592
O35379	Abcc1	MRP1	884	single	R.TYANAEQDLASEDDSVS#GSGK.E	374.731	550.066	505.45	390.129	346.545	399.394	375.991	354.338	452.052	0.771845	0.4	0.742218	0.743874	0.4	0.557775
B2RX12	Abcc3	MRP3	907	single	R.EMSSLS#S#EGEVQNR.T	329.418	592.359	761.803	445.338	498.439	630.471	565.367	464.933	589.717	0.841448	1	1	0.954433	0.7	0.80192
B2RX12	Abcc3	MRP3	906	single	R.EMSSLS#S#EGEVQNR.T	499.549	916.887	1242.84	750.16	714.096	1166.53	727.008	965.269	946.013	0.81816	1	1	1.03177	1	1
E9Q236	Abcc4	E9Q236	646	single	K.ENEEAEPSTAPGT#PTLR.K	532.534	837.211	863.502	562.408	552.403	666.227	613.267	756.601	763.767	0.671764	0.7	0.902214	0.903716	0.7	0.80192
Q9R1X5	Abcc5	MRP5	43	single	R.S#LECQDALETAAR.V	347.415	382.75	435.209	371.662	326.712	381.681	409.979	420.145	325.329	0.971031	0.4	0.742218	1.07114	1	1
Q6P542	Abcf1	ABCF1	107	single	K.QLS#VPAS#DEEDEVPAPIPR.G	1101.58	1186.41	1284.49	1409.1	1148.63	936.119	1625.27	1797.31	1605.92	0.968159	1	1	1.36991	0.1	0.218592
Q6P542	Abcf1	ABCF1	138	single	K.GGNVFEALIQDDS#EEEEEEEENR.V	800.822	1037.33	1187.84	1154.33	1074.98	853.002	1330.23	1327.29	1350.42	1.0363	1	1	1.28236	0.1	0.218592
Q6P542	Abcf1	ABCF1	22	single	K.QQPPEPEWIGDGEGTS#PADK.V	408.788	445.989	504.643	482.929	378.426	418.023	354.09	367.5	394.465	0.937293	0.7	0.902214	0.824012	0.1	0.218592
Q6P542	Abcf1	ABCF1	194	single	K.SKPAAADS#EGEEEEEDTAK.E	5290.87	913.588	1689.09	2350.25	3942.13	143.159	3990.76	1079.78	3719.02	1.39143	1	1	2.20179	1	1
Q5F2F2	Abhd15	ABH15	442	single	K.REVS#PSSNLEEIFNWK.R	196.333	224.536	230.478	266.626	199.899	195.812	378.595	331.476	392.597	0.89028	1	1	1.68613	0.1	0.218592
Q8CBW3	Abi1	ABI1	213	single	K.TLEPVKPPTVPNDY#MTSPAR.L	262.944	357.544	307.287	683.896	590.486	564.329	227.548	168.152	269.446	1.92161	0.1	0.449082	0.740505	0.2	0.344665
Q8CBW3	Abi1	ABI1	183	single	R.TNPPTQKPPS#PPVSGR.G	271.986	265.679	282.774	264.81	312.042	259.883	230.087	152.872	262.484	0.973619	0.7	0.902214	0.845951	0.1	0.218592
Q8CBW3	Abi1	ABI1	267	single	R.ENSGSSSIGIPIAVPTPS#PPTAGPAAPGAAPGSQYGTMTR.Q	69.2676	89.8323	61.1512	70.4872	79.3672	81.9598	58.0179	42.9993	71.4199	1.14581	0.7	0.902214	0.837591	0.4	0.557775
P62484	Abi2	ABI2	221	single	R.NMAPSQQS#PVR.T	3272.13	2298.81	3296.31	2846.37	2757.04	2921.68	582.686	371.219	888.263	0.869882	0.7	0.902214	0.178075	0.1	0.218592
P62484	Abi2	ABI2	177	single	R.TTPPTQKPPS#PPMSGK.G	2455.51	2247.91	2364.05	2020.91	2112.56	2103.62	1201.63	1106.77	1482.99	0.889836	0.1	0.449082	0.508293	0.1	0.218592
P62484	Abi2	ABI2	301	single	R.HTPPTIGGS#LPYR.R	246.453	271.009	186.817	309.142	326.306	245.954	110.445	148.288	148.753	1.25436	0.4	0.742218	0.601689	0.1	0.218592
Q8BYZ1	Abi3	ABI3	343	single	R.RYS#DGWCEGVSSEGTGFFPGNYVEPSC.-	25.3632	21.0676	18.2664	20.3439	12.0081	14.5217	8.03329	1.7793	2.51713	0.68929	0.2	0.571462	0.119479	0.1	0.218592
Q8BYZ1	Abi3	ABI3	219	single	K.LSAASSASSLASAGS#AEGASGIPQSK.G	219.64	170.365	206.97	105.069	118.964	102.219	158.269	88.5723	175.117	0.507652	0.1	0.449082	0.764698	0.2	0.344665
E9Q8E3	Abi3bp	E9Q8E3	606	single	K.EPTAPAS#EEEFGTTTDFSSSPTK.E	570.625	541.719	509.542	425.892	297.714	356.591	235.973	277.82	310.281	0.658258	0.1	0.449082	0.512849	0.1	0.218592
E9Q8E3	Abi3bp	E9Q8E3	716	single	R.ENGSFS#GK.N	473.247	69.6426	108.749	151.021	108.017	250.174	101.985	105.779	87.7041	1.38872	1	1	0.937801	0.7	0.80192
P00520	Abl1	ABL1	812	single	K.DTESS#PGSSPPSLT#PK.L	856.598	856.101	909.399	1141.65	929.813	838.461	730.776	977.198	879.85	1.08547	0.7	0.902214	1.02714	1	1
Q4JIM5	Abl2	ABL2	785	single	R.SNS#TSSMSSGLPEQDR.M	154.413	214.095	185.656	325.952	268.737	238.769	116.738	140.526	148.021	1.44749	0.1	0.449082	0.756914	0.1	0.218592
Q4JIM5	Abl2	ABL2	621	single	R.STQASSGS#PALPR.K	136.609	189.414	171.168	320.672	229.506	230.605	146.553	163.396	168.701	1.34724	0.1	0.449082	0.954592	0.7	0.80192
Q4JIM5	Abl2	ABL2	632	single	K.QRDKS#PSSLLEDAK.E	1073.55	1056.24	1261.49	1138.61	1098.14	977.506	1487.62	2757.65	1974.69	1.02291	1	1	1.8394	0.1	0.218592
Q4JIM5	Abl2	ABL2	822	single	R.TVSTSS#QPEENVDR.A	468.836	501.777	546.785	659.234	512.246	489.913	328.117	381.287	490.897	1.02086	0.7	0.902214	0.759873	0.2	0.344665
Q4JIM5	Abl2	ABL2	72	single	K.TGGSS#PEVLHRPFGCDAESQALNEAIR.W	26.4272	49.1481	46.6823	71.0989	34.3365	38.0899	75.6336	50.3499	52.8959	0.815939	1	1	1.1331	0.1	0.218592
Q8K4G5	Ablim1	ABLM1	499	single	R.STSQGS#INS#PVYSR.H	299.063	372.714	238.129	530.308	424.725	478.745	101.827	138.031	135.565	1.60082	0.1	0.449082	0.453297	0.1	0.218592
Q8K4G5	Ablim1	ABLM1	738	single	K.TSS#LPGYGK.N	3145.96	2287.69	2699.83	2306.08	3423.13	3067.07	1032.92	1367.33	1252.89	1.13602	0.7	0.902214	0.464063	0.1	0.218592
Q8K4G5	Ablim1	ABLM1	496	single	R.STS#QGSINSPVYSR.H	1050.14	1236.41	1159.47	1700.17	1560.05	1590.34	768.424	695.622	918.635	1.37161	0.1	0.449082	0.662737	0.1	0.218592
Q8K4G5	Ablim1	ABLM1	477	single	R.TLSPT#PS#AEGYQDVR.D	446.306	437.44	440.997	475.275	483.942	461.403	354.535	382.268	401.595	1.07773	0.1	0.449082	0.866827	0.1	0.218592
Q8K4G5	Ablim1	ABLM1	215	single	R.DCLCQLCAQPMSS#SPK.E	278.559	211.46	379.579	326.506	206.786	172.046	540.388	229.751	321.356	0.742343	0.4	0.742218	1.15364	0.7	0.80192
Q8K4G5	Ablim1	ABLM1	502	single	R.STSQGSINS#PVYSR.H	124.994	183.25	172.148	213.551	187.607	154.485	167.701	131.697	186.411	1.0898	0.4	0.742218	0.97417	1	1
Q8K4G5	Ablim1	ABLM1	411	single	R.TSSESIYSRPGSSIPGS#PGHTIYAK.V	13.9281	43.0881	27.876	45.8808	23.438	25.9825	33.1637	38.1045	38.4281	0.932076	1	1	1.36693	0.7	0.80192
Q8BL65-4	Ablim2	ABLM2	521	single	R.TNS#PDLDSQSLSLSSGTDQEPLQR.M	85.8005	64.8356	67.6204	70.0547	53.9321	43.3251	39.3032	37.5912	39.5572	0.797571	0.4	0.742218	0.581232	0.1	0.218592
Q8BL65-4	Ablim2	ABLM2	358	single	R.QSYGESPQLLSPT#PTEGDQDDR.S	90.4499	78.0851	79.6345	53.6326	68.26	95.6042	37.6266	62.269	40.3678	0.857167	0.7	0.902214	0.506914	0.1	0.218592
Q8BL65-4	Ablim2	ABLM2	294	single	R.TSSESIVSVPASSTSGS#PSR.V	465.247	313.844	335.951	317.536	220.493	172.759	326.609	388.776	370.754	0.656323	0.2	0.571462	1.10359	1	1
Q8BL65-4	Ablim2	ABLM2	497	single	R.RLDVEDSS#FDQDSR.K	245.643	175.056	136.383	171.429	153.555	132.002	76.0368	124.328	108.947	0.877179	0.4	0.742218	0.622358	0.1	0.218592
Q8BL65-4	Ablim2	ABLM2	356	single	R.QSYGESPQLLS#PTPTEGDQDDR.S	155.506	92.5072	112.032	110.512	75.764	67.8314	62.903	95.2971	88.0043	0.676269	0.2	0.571462	0.785525	0.2	0.344665
Q69ZX8	Ablim3	ABLM3	503	single	R.RFS#S#GGEEEDFDR.S	95.8836	114.796	124.404	98.0887	77.8836	62.6316	104.744	113.47	119.917	0.678454	0.2	0.571462	0.988452	1	1
Q69ZX8	Ablim3	ABLM3	502	single	R.RFS#S#GGEEEDFDR.S	683.881	841.945	772.349	918.776	655.012	655.015	493.531	568.013	493.927	0.848082	0.7	0.902214	0.639513	0.1	0.218592
Q69ZX8	Ablim3	ABLM3	282	single	R.TSETSIS#PPGSSIGSPNR.V	84.1418	105.22	117.92	70.7212	66.5603	61.3728	93.9541	37.892	113.941	0.632579	0.1	0.449082	0.892926	0.7	0.80192
Q69ZX8	Ablim3	ABLM3	373	single	R.RAS#S#PGYIDSPTYSR.Q	726.538	880.618	859.948	795.938	681.234	611.436	670.77	716.424	851.693	0.79218	0.2	0.571462	0.833101	0.2	0.344665
Q5SSL4	Abr	ABR	72	single	R.SQGGGDS#VS#PTPPEGLAPGVEAGK.G	157.626	222.624	242.056	241.915	246.508	183.136	451.451	532.201	413.642	1.08665	0.7	0.902214	2.02786	0.1	0.218592
Q5SSL4	Abr	ABR	64	single	R.S#QGGGDSVS#PTPPEGLAPGVEAGK.G	85.4759	105.99	116.383	123.762	123.849	94.0726	230.327	334.465	222.894	1.16767	0.4	0.742218	2.1731	0.1	0.218592
Q5SSL4	Abr	ABR	53	single	K.GPPEGSETMPYIDES#PTM*S#PQLSAR.S	221.561	288.402	234.356	336.359	351.647	310.61	293.784	279.95	294.299	1.43525	0.1	0.449082	1.25358	0.2	0.344665
Q5SSL4	Abr	ABR	61	single	K.GPPEGSETMPYIDESPTMSPQLS#AR.S	26.5012	46.8883	28.214	52.4849	42.6183	43.4574	18.5031	67.3105	36.2942	1.54028	0.4	0.742218	1.28639	1	1
E9Q4Z2	Acacb	E9Q4Z2	1332	single	R.M*AVPISVS#NPDLLR.H	400.282	756.825	482.376	355.832	366.713	693.063	327.02	152.488	333.648	0.760221	0.4	0.742218	0.677935	0.1	0.218592
Q6ZQK5	Acap2	ACAP2	384	single	K.SSPS#TGS#LDSGNESK.E	1345.1	739.548	1207.35	1664.51	1316.23	1575.11	1307.45	1775.49	1413.68	1.3046	0.2	0.571462	1.17089	0.2	0.344665
A2ADA6	Acap3	A2ADA6	379	single	R.TAS#PSTSSIDSTTDSR.E	286.995	352.823	383.629	297.556	277.4	279.705	294.183	291.669	334.844	0.792762	0.2	0.571462	0.833796	0.7	0.80192
Q5XG73	Acbd5	ACBD5	185	single	K.AESS#DS#GAESEEEEAQEELK.G	55.9471	42.9457	56.0463	43.5367	47.4184	32.1587	75.1692	58.3197	66.0958	0.778175	0.4	0.742218	1.1814	0.1	0.218592
Q5XG73	Acbd5	ACBD5	191	single	K.AESSDSGAES#EEEEAQEELK.G	282.347	401.783	461.181	357.634	295.747	296.898	538.033	454.528	525.112	0.73895	0.7	0.902214	1.30695	0.2	0.344665
Q5XG73	Acbd5	ACBD5	395	single	R.IPHLS#EGPK.G	460.921	588.372	442.947	489.896	601.151	1052.92	302.23	527.989	341.931	1.30424	0.2	0.571462	0.741844	0.4	0.557775
Q5XG73	Acbd5	ACBD5	160	single	K.SS#DLTSDLGNVLTSSNAK.A	15.0431	15.0735	23.5267	20.8258	15.8569	16.9562	19.3359	25.4192	24.022	1.1249	0.7	0.902214	1.59366	0.2	0.344665
Q5EE38	Acd	ACD	25	single	R.ELILGSETLSS#PR.T	212.617	192.57	212.457	229	202.47	178.557	174.933	212.052	179.976	0.952992	1	1	0.847117	0.2	0.344665
Q9JIX8	Acin1	ACINU	479	single	R.SLS#PLS#GTTDTK.A	2571.16	1793.47	2146.48	1633.07	2669.64	2313.59	775.511	556.049	949.178	1.07785	1	1	0.361295	0.1	0.218592
Q9JIX8	Acin1	ACINU	468	single	R.EPLAS#PHPAQLLR.S	172.439	268.235	236.083	368.978	511.252	701.26	48.0476	88.5193	100.811	2.16556	0.1	0.449082	0.37495	0.1	0.218592
Q9JIX8	Acin1	ACINU	655	single	K.S#LSPGVSR.D	467.612	332.298	389.055	536.02	459.346	412.033	123.711	159.921	163.991	1.18067	0.4	0.742218	0.41105	0.1	0.218592
Q9JIX8	Acin1	ACINU	454	single	K.EASSPPTHIQLQEEMEPVEGPAPPVLIQLS#PPNTDAGAR.E	52.459	73.8006	75.1432	66.5739	79.8763	65.2278	29.5973	19.7778	36.5612	0.902079	1	1	0.401044	0.1	0.218592
Q9JIX8	Acin1	ACINU	417	single	K.APVVLQPEQIVS#EEET#PPPLLTK.E	62.305	49.5884	44.2556	61.9056	54.011	56.6293	36.5318	33.0372	38.2888	1.14199	0.7	0.902214	0.7367	0.1	0.218592
Q9JIX8	Acin1	ACINU	253	single	K.LPEYSQTAEEEEDQET#PSR.N	46.9711	55.4408	85.8608	87.1226	78.9667	94.6538	34.3348	42.5702	42.6709	1.57145	0.2	0.571462	0.76785	0.1	0.218592
Q9JIX8	Acin1	ACINU	387	single	K.S#QS#PS#PPPLPEDLEK.A	372.018	314.909	339.093	300.734	343.829	255.58	245.562	220.478	224.16	0.886877	0.4	0.742218	0.661057	0.1	0.218592
Q9JIX8	Acin1	ACINU	391	single	K.S#QS#PS#PPPLPEDLEK.A	4179.09	3452.22	4407.17	3858.26	3758.54	3203.31	2788.17	2567.05	3123.07	0.899367	0.4	0.742218	0.667172	0.1	0.218592
Q9JIX8	Acin1	ACINU	1003	single	R.TAQVPS#PPRGK.I	1251.15	1249.38	1163.29	1273.03	1372.47	1091.08	1396.44	1508.38	1539.54	1.01893	0.7	0.902214	1.20731	0.1	0.218592
Q9JIX8	Acin1	ACINU	413	single	K.APVVLQPEQIVS#EEET#PPPLLTK.E	88.423	119.447	103.803	106.643	101.53	99.6451	77.8724	72.3169	92.1444	0.978101	1	1	0.750196	0.2	0.344665
Q9JIX8	Acin1	ACINU	865	single	K.KPSIS#ITTESLK.S	192.457	275.718	219.46	320.762	263.812	381.827	174.12	304.145	223.545	1.4616	0.2	0.571462	1.01862	1	1
Q9JIX8	Acin1	ACINU	797	single	K.EEVTMDTSENRPENEVPEPPLPVADQVS#NDERPEGGAEEEEK.K	170.601	166.338	206.585	206.719	170.335	151.626	148.799	175.079	166.344	0.998441	1	1	0.975048	0.7	0.80192
P56485	Ackr3	ACKR3	350	single	K.LIDASRVS#ETEYSALEQNTK.-	377.103	518.629	433.579	337.604	481.005	535.119	337.441	193.859	376.833	1.10938	1	1	0.778268	0.1	0.218592
Q3V117	Acly	Q3V117	455	single	R.TAS#FSESRADEVAPAK.K	1299.06	1519.05	1666.31	1550.27	1404	1950.64	785.303	1314.74	844.371	1.02055	0.7	0.902214	0.555854	0.2	0.344665
Q3V117	Acly	Q3V117	481	single	K.AKPAMPQDSVPS#PR.S	1366.84	1882.15	2250.5	1811.23	1522.52	1667.05	2066.34	1981.16	2652.77	0.885718	0.7	0.902214	1.09786	0.4	0.557775
O55137	Acot1	ACOT1	416	single	K.QLGSECLHVS#PK.I	366.606	473.518	461.019	398.169	251.839	327.496	385.869	293.383	250.5	0.710373	0.2	0.571462	0.636379	0.2	0.344665
A2AVR6	Acot11	A2AVR6	45	single	K.S#ISHPESGDPPTMAEGEGYR.N	14.7152	39.762	20.4787	75.3401	77.1938	70.4604	10.6697	19.2261	15.2864	3.67895	0.1	0.449082	0.746454	0.4	0.557775
A2AVR6	Acot11	A2AVR6	27	single	R.SPPCT#FLGQGFASM*FSNR.T	21.5746	23.3911	29.2689	27.2131	28.5193	25.0067	37.5922	54.2021	31.8429	1.16339	0.7	0.902214	1.60711	0.1	0.218592
Q9R0H0	Acox1	ACOX1	644	single	K.T#EVHESYYK.H	172.597	405.614	184.848	246.272	251.842	219.117	292.698	209.154	339.206	1.33229	0.7	0.902214	1.58345	0.7	0.80192
Q8BP40	Acp6	PPA6	400	single	K.FLNTMSVYSVS#PEK.Y	129.233	184.749	138.098	153.833	143.336	138.623	213.345	195.463	206.771	1.03793	0.7	0.902214	1.49728	0.1	0.218592
Q9QXG4	Acss2	ACSA	263	single	R.AELGM*NDS#PSQS#PPVK.R	358.832	423.808	544.58	351.935	423.645	443.666	577.107	470.193	552.787	0.999614	0.7	0.902214	1.30433	0.2	0.344665
Q9QXG4	Acss2	ACSA	267	single	R.AELGMNDS#PSQS#PPVK.R	277.635	385.126	465.027	335.338	348.886	354.145	462.856	408.339	470.975	0.905901	0.7	0.902214	1.20183	0.4	0.557775
Q9QXG4	Acss2	ACSA	265	single	R.AELGMNDSPS#QSPPVK.R	137.151	181.995	214.471	116.824	161.963	169.355	200.906	164.461	215.331	0.889932	0.4	0.742218	1.10391	0.7	0.80192
P62737	Acta2	ACTA	302	single	K.DLYANNVLS#GGTTM*YPGIADR.M	14.7865	16.2618	14.7313	19.0748	27.8229	28.5634	6.21999	25.3074	19.5395	1.88164	0.1	0.449082	1.32144	0.7	0.80192
P62737	Acta2	ACTA	200	single	R.GY#SFVTTAER.E	324.333	317.349	380.483	348.294	239.772	238.828	273.877	386.258	325.325	0.739277	0.4	0.742218	1.00306	1	1
P60710	Actb	ACTB	300	single	K.DLYANTVLS#GGTTMYPGIADR.M	13.1516	20.12	18.1644	16.2185	19.3849	13.6792	37.3719	34.3908	45.8289	0.892871	1	1	2.05742	0.1	0.218592
P60710	Actb	ACTB	368	single	K.QEYDESGPS#IVHR.K	135.976	139.744	167.916	144.2	155.388	119.073	335.47	368.851	314.39	1.03189	1	1	2.40061	0.1	0.218592
P60710	Actb	ACTB	239	single	K.S#YELPDGQVITIGNER.F	777.307	758.993	847.638	615.768	476.891	454.863	480.704	608.593	653.081	0.613517	0.1	0.449082	0.782951	0.1	0.218592
P60710	Actb	ACTB	52	single	K.DS#YVGDEAQSK.R	1020.75	617.756	940.062	842.651	733.573	633.741	1080.32	1600.51	1476.07	0.780345	0.7	0.902214	1.57018	0.1	0.218592
P60710	Actb	ACTB	323	single	K.EITALAPS#TMK.I	331.916	350.139	295.115	260.697	336.055	254.701	354.932	488.062	511.44	0.785432	0.4	0.742218	1.47044	0.1	0.218592
P60710	Actb	ACTB	198	single	R.GY#SFTTTAER.E	185.715	226.807	242.808	255.143	190.291	194.58	279.092	413.561	309.351	0.857907	1	1	1.36394	0.1	0.218592
P60710	Actb	ACTB	249	single	K.SYELPDGQVIT#IGNER.F	344.772	332.574	155.743	258.761	340.014	229.603	115.881	169.054	202.279	0.778057	1	1	0.50832	0.4	0.557775
P60710	Actb	ACTB	60	single	K.DSYVGDEAQS#K.R	1220.61	560.883	753.07	1028.85	787.188	775.919	842.427	1681.82	1065.53	1.04531	0.7	0.902214	1.41492	0.4	0.557775
P57780	Actn4	ACTN4	424	single	K.AS#IHEAWTDGK.E	685.645	685.88	859.988	472.587	487.835	470.989	495.322	879.34	530.059	0.689022	0.1	0.449082	0.772816	0.7	0.80192
P57780	Actn4	ACTN4	657	single	R.QFAS#QANMVGPWIQTK.M	30.266	38.9689	40.1827	29.5698	26.856	30.1391	22.5035	34.1756	32.6601	0.758807	0.1	0.449082	0.838108	0.4	0.557775
P57780	Actn4	ACTN4	192	single	K.NVNVQNFHIS#WK.D	194.738	303.127	288.416	187.064	249.349	584.176	348.189	518.477	439.957	0.864546	1	1	1.52543	0.1	0.218592
P57780	Actn4	ACTN4	160	single	R.FAIQDIS#VEETSAK.E	260.981	296.056	279.512	280.378	307.777	306.389	443.888	238.093	380.306	1.09615	0.2	0.571462	1.36061	0.7	0.80192
Q99JY9	Actr3	ARP3	119	single	R.AEPEDHYFLLTEPPLNT#PENR.E	26.6705	30.4396	27.7025	33.4135	31.1093	31.318	41.4928	45.4916	36.2367	1.13051	0.1	0.449082	1.4978	0.1	0.218592
P03958	Ada	ADA	220	single	R.TVHAGEVGS#PEVVR.E	186.185	198.068	198.541	188.096	156.089	126.251	165.498	168.665	160.061	0.78806	0.2	0.571462	0.835563	0.1	0.218592
Q9Z0F8	Adam17	ADA17	773	single	R.M*DTIQEDPST#DS#HADDDGFEK.D	278.925	289.774	267.718	378.306	332.847	331.242	126.77	151.751	158.859	1.19332	0.1	0.449082	0.544057	0.1	0.218592
Q9Z0F8	Adam17	ADA17	770	single	R.MDTIQEDPS#T#DSHADDDGFEK.D	220.914	191.423	177.227	195.633	179.287	147.731	130.782	124.96	172.901	0.9366	0.7	0.902214	0.68321	0.1	0.218592
Q9Z0F8	Adam17	ADA17	771	single	R.MDTIQEDPS#T#DSHADDDGFEK.D	68.6884	68.7716	60.5631	63.6671	87.7831	67.7072	50.5281	48.2643	66.3713	0.985715	1	1	0.735613	0.2	0.344665
Q9Z0F8	Adam17	ADA17	794	single	K.S#FEDLTDHPVTR.S	57.3343	46.1458	61.356	66.0861	69.1845	47.8193	43.4269	68.7287	62.1734	1.15264	0.4	0.742218	1.0844	0.7	0.80192
Q9R1V6	Adam22	ADA22	832	single	R.SNS#WQGNM*GGNK.K	430.797	407.821	486.241	351.271	303.099	312.241	280.258	347.166	310.33	0.724799	0.1	0.449082	0.720362	0.1	0.218592
Q9R1V6	Adam22	ADA22	869	single	K.SPSSST#GSIASSR.K	88.9305	33.2733	80.2099	66.8047	26.5288	48.1372	31.7615	35.2693	36.7931	0.60014	0.4	0.742218	0.439712	0.4	0.557775
Q9R1V6	Adam22	ADA22	855	single	R.SNS#TETLSPAK.S	870.662	467.088	646.044	691.148	568.224	522.267	417.263	501.539	496.757	0.879543	1	1	0.76892	0.4	0.557775
Q99MU3	Adar	DSRAD	238	single	R.GEPGLDSEDGDPAS#DLEGPSEPLDM*AEIK.E	379.848	409.967	497.035	571.96	382.427	435.001	521.197	634.265	570.412	1.06106	0.7	0.902214	1.39136	0.1	0.218592
Q9JHI2	Adat1	ADAT1	169	single	R.SWANNS#PVQETENLEDSK.D	157.571	162.799	187.669	183.638	151.265	137.252	207.576	222.56	220.692	0.929152	0.4	0.742218	1.35561	0.1	0.218592
Q01341	Adcy6	ADCY6	53	single	K.NAEPPS#PTPAAHTR.C	366.355	174.772	344.835	561.984	346.842	540.114	333.089	374.082	331.339	1.5663	0.2	0.571462	0.965938	1	1
Q01341	Adcy6	ADCY6	573	single	R.ANS#M*EGLM*PR.W	106.985	179.565	167.077	154.499	161.865	184.003	161.989	260.423	180.765	0.968801	1	1	1.08192	0.4	0.557775
P51830	Adcy9	ADCY9	1332	single	K.AIEKDS#CEDIGVEEASELSK.L	42.5902	48.8313	58.7626	62.3398	48.5909	50.6012	54.5807	36.2319	37.8537	1.03625	0.7	0.902214	0.775194	0.4	0.557775
P51830	Adcy9	ADCY9	613	single	R.GQGTASPGS#VSDLAQTVK.T	23.6976	34.827	41.4847	31.8501	26.286	28.2284	30.2664	34.4269	35.459	0.810532	0.7	0.902214	0.988511	1	1
Q9QYC0	Add1	ADDA	11	single	R.AAVVT#SPPPTTAPHK.E	560.761	687.39	637.423	628.855	487.966	507.568	269.048	337.363	304.68	0.796282	0.2	0.571462	0.477986	0.1	0.218592
Q9QYC0	Add1	ADDA	600	single	K.EKS#PPDQSAVPNTPPS#T#PVKLEEDLPQEPTSR.D	250.43	268.497	291.165	254.468	197.164	173.486	178.521	160.906	182.214	0.734326	0.2	0.571462	0.664892	0.1	0.218592
Q9QYC0	Add1	ADDA	610	single	K.SPPDQSAVPNT#PPST#PVK.L	574.086	509.502	506.444	452.897	460.037	422.034	457.335	477.952	444.744	0.888902	0.1	0.449082	0.897612	0.1	0.218592
Q9QYC0	Add1	ADDA	613	single	K.EKS#PPDQSAVPNTPPS#T#PVKLEEDLPQEPTSR.D	39.8672	36.2143	49.3884	54.6659	47.0004	60.7715	48.9091	50.7214	50.5489	1.3712	0.2	0.571462	1.26793	0.2	0.344665
Q9QYC0	Add1	ADDA	480	single	R.T#STSAVPNLFVPLNTNPK.E	22.735	39.2448	20.3027	35.591	30.0242	42.4183	14.486	26.7311	14.3986	1.56548	0.4	0.742218	0.637167	0.4	0.557775
Q9QYC0	Add1	ADDA	429	single	K.KYSDVEVPASVTGHSFASDGDSGT#CSPLR.H	292.885	671.597	520.946	563.283	294.319	342.768	328.437	299.193	293.947	0.657973	1	1	0.574326	0.7	0.80192
Q9QYC0	Add1	ADDA	366	single	R.SPGTPAGEGSGS#PPK.W	439.239	132.675	198.355	539.394	252.947	369.058	315.814	287.885	236.932	1.86059	0.4	0.742218	1.45136	0.7	0.80192
Q9QYC0	Add1	ADDA	355	single	K.SRS#PGT#PAGEGSGSPPK.W	450.306	34.8255	61.373	302.024	76.9862	261.248	113.126	86.5861	40.2094	4.25672	0.7	0.902214	1.41082	1	1
Q9QYC0	Add1	ADDA	465	single	R.WLHSGRGDDASEEGQNGSS#PK.S	273.627	832.768	425.422	388.457	683.597	269.439	467.915	589.127	504.083	0.91311	0.7	0.902214	1.1849	0.7	0.80192
Q9QYB8	Add2	ADDB	530	single	K.SRS#PS#TESQLMSK.G	932.122	804.918	942.783	710.065	522.669	569.809	417.674	413.547	491.016	0.611303	0.1	0.449082	0.44809	0.1	0.218592
Q9QYB8	Add2	ADDB	696	single	K.TESVTSGPLS#PEGS#PSK.S	182.749	144.408	159.21	144.501	142.434	112.787	89.848	82.4757	101.214	0.894629	0.2	0.571462	0.564335	0.1	0.218592
Q9QYB8	Add2	ADDB	532	single	K.SRSPS#TESQLMSK.G	1691.53	1158.22	1705.45	941.324	849.106	887.24	791.161	898.259	887.234	0.524518	0.1	0.449082	0.524515	0.1	0.218592
Q9QYB8	Add2	ADDB	678	single	K.GLGQMTTNADTDGDS#YK.D	147.899	117.058	114.58	109.435	100.922	112.426	67.7987	99.5436	82.621	0.934879	0.1	0.449082	0.705815	0.1	0.218592
Q9QYB8	Add2	ADDB	594	single	K.DIATEKPGS#PVK.S	2980.16	1348.07	2451.26	1307.62	1440.45	1480.38	806.77	1307.88	1088.9	0.587634	0.4	0.742218	0.444218	0.1	0.218592
Q9QYB5	Add3	ADDG	621	single	K.SFTS#MDAPVMIMNGK.D	7.86869	11.8319	3.24253	23.6642	27.7314	16.5225	0.489826	0.999431	1.31843	3.00738	0.1	0.449082	0.127014	0.1	0.218592
Q9QYB5	Add3	ADDG	677	single	R.TEEVLS#PDGS#PSK.S	1950.3	1700.75	2033.65	1512.7	1526.61	1551.46	877.345	1095.15	1175.23	0.782758	0.1	0.449082	0.561531	0.1	0.218592
Q9QYB5	Add3	ADDG	402	single	R.HKS#DVEIPATVTAFSFEDDSAPLSPLK.F	487.068	591.062	601.964	549.263	387.935	581.051	241.307	319.642	315.976	0.929282	0.4	0.742218	0.53459	0.1	0.218592
Q9QYB5	Add3	ADDG	664	single	K.S#PERTEEVLS#PDGS#PSK.S	140.671	121.048	172.572	105.729	95.9676	104.099	107.904	96.1249	96.2632	0.740018	0.1	0.449082	0.684313	0.1	0.218592
Q9QYB5	Add3	ADDG	583	single	K.QQGLDDAEQGS#LSDDAASVSQIQSQTQSPQSVPERLEENHELFSK.S	9.55846	19.7782	17.4043	14.9391	11.8296	13.7505	8.07562	8.48626	8.76041	0.790068	0.7	0.902214	0.487597	0.1	0.218592
Q9QYB5	Add3	ADDG	673	single	R.TEEVLS#PDGS#PSK.S	1527.42	1298.57	1425.86	1301.63	1092.85	1738.62	848.362	1403.95	940.718	0.912867	1	1	0.659752	0.2	0.344665
Q9QYB5	Add3	ADDG	585	single	K.QQGLDDAEQGSLS#DDAASVSQIQSQTQSPQSVPER.L	81.5405	80.6675	104.719	71.0398	79.1818	65.8694	60.3867	93.4926	46.7304	0.871221	0.1	0.449082	0.740573	0.4	0.557775
A2BDX0	Adnp	A2BDX0	98	single	R.NVHS#EDFENR.I	252.311	166.7	175.103	302.579	267.83	330.186	99.3504	150.597	110.782	1.72801	0.1	0.449082	0.632669	0.1	0.218592
A2BDX0	Adnp	A2BDX0	959	single	K.LM*HDAS#DS#EVDQDDVVEWK.D	379.206	361.905	507.982	508.616	431.661	243.756	692.61	672.01	581.501	1.13833	1	1	1.77215	0.1	0.218592
A2BDX0	Adnp	A2BDX0	708	single	R.LNQS#PGLAPVK.R	1381.09	1872.78	1443.11	1621.64	1686.29	2017.85	1096.21	1476.8	1417.3	1.16851	0.4	0.742218	0.982115	0.7	0.80192
A2BDX0	Adnp	A2BDX0	961	single	K.LM*HDAS#DS#EVDQDDVVEWK.D	120.919	158.355	161.821	184.208	141.337	136.054	152.586	180.424	175.289	0.892527	1	1	1.10693	0.4	0.557775
A2BDX0	Adnp	A2BDX0	606	single	K.S#SPQAAVPYK.K	177.511	296.451	222.076	312.403	223.685	259.96	226.133	189.21	265.053	1.17059	0.4	0.742218	1.01827	1	1
A2BDX0	Adnp	A2BDX0	904	single	K.IPS#DNLEEPVPK.V	1295.34	1319.64	1648.77	1479.14	1266.94	1323.18	1341.94	1637.12	1429.93	1.00268	1	1	1.08358	0.7	0.80192
P34971	Adrb1	ADRB1	417	single	R.AGPPPSPGAPS#DDDDDDAGTTPPAR.L	23.3432	25.4912	25.0718	22.8854	16.846	11.5816	17.7345	20.2766	20.8919	0.671908	0.1	0.449082	0.808739	0.1	0.218592
Q99MK8	Adrbk1	ARBK1	487	single	R.GEVNAADAFDIGS#FDEEDTK.G	33.3791	40.2399	51.3663	37.508	46.5169	43.2588	50.5173	85.5415	59.4664	1.07502	1	1	1.4778	0.2	0.344665
Q99MK8	Adrbk1	ARBK1	670	single	R.S#PVVELSK.V	315.446	347.021	463.334	352.583	224.513	369.18	355.33	639.222	483.383	1.01603	1	1	1.39295	0.2	0.344665
Q9Z248	Aebp2	AEBP2	24	single	R.LSPLS#PGS#PGPAAR.G	341.759	324.344	274.435	275.059	278.086	286.264	152.094	62.6907	159.162	0.857379	0.7	0.902214	0.46893	0.1	0.218592
Q9Z248	Aebp2	AEBP2	131	single	R.SLS#PGAASSSSGDGDGK.E	479.665	211.319	402.678	463.176	355.482	313.307	275.987	299.017	295.776	0.882794	1	1	0.734523	0.7	0.80192
Q9Z248	Aebp2	AEBP2	199	single	R.RGS#LEMSSDGEPLSR.M	226.92	235.207	258.018	280.54	269.262	204.664	260.737	256.977	265.972	1.14479	0.7	0.902214	1.10854	0.2	0.344665
Q80YS6	Afap1	AFAP1	687	single	R.TLENSPISSCDT#SDAEGPLPVNSAAVLK.K	208.934	179.711	188.96	170.096	150.856	156.873	132.055	69.0587	103.664	0.830195	0.1	0.449082	0.548604	0.1	0.218592
Q80YS6	Afap1	AFAP1	284	single	K.KLSS#ERPS#S#DGEGGVENGVTTCNGK.E	464.687	699.35	811.737	492.335	427.906	467.803	451.581	372.406	395.296	0.66891	0.4	0.742218	0.565234	0.1	0.218592
Q80YS6	Afap1	AFAP1	344	single	K.KPSTDEQTS#S#AEEDVPTCGYLNVLSNSR.W	221.431	225.602	365.376	133.665	151.887	151.07	274.4	157.078	162.023	0.669629	0.1	0.449082	0.71818	0.4	0.557775
Q80YS6	Afap1	AFAP1	343	single	K.KPSTDEQTS#S#AEEDVPTCGYLNVLSNSR.W	103.619	112.058	175.232	59.1581	87.5678	77.5173	154.027	94.0392	85.5786	0.69176	0.1	0.449082	0.8392	0.4	0.557775
Q80YS6	Afap1	AFAP1	669	single	R.SGTSS#PQS#PVFR.H	742.751	1090.43	983.197	901.283	1003.41	713.664	768.614	646.461	895.861	0.916687	0.7	0.902214	0.78175	0.4	0.557775
Q5DTU0	Afap1l2	AF1L2	645	single	R.ISFPANCPDTMASAPIAAS#PPVK.E	35.9989	46.5547	42.5032	47.3211	39.2996	48.7276	37.4591	32.8782	30.9727	1.11335	0.4	0.742218	0.773545	0.2	0.344665
Q5DTU0	Afap1l2	AF1L2	383	single	R.DSHLHFY#QDR.N	16.6418	14.041	15.5851	12.356	11.551	12.8631	14.7311	24.352	18.3919	0.792806	0.1	0.449082	1.1801	0.4	0.557775
Q5DTU0	Afap1l2	AF1L2	154	single	R.SINEDGEAVSSSYESYDEDENS#K.G	36.8007	42.0449	54.8945	37.3624	36.8639	35.4019	36.2068	39.5976	39.7771	0.876774	0.4	0.742218	0.941793	0.4	0.557775
Q5DTU0	Afap1l2	AF1L2	413	single	K.VAQQPLSLVGCDVLPDPSPDHLY#SFR.I	12.078	39.6919	33.9151	44.6474	21.4107	21.0882	33.0709	18.9935	20.58	0.631302	1	1	0.606808	0.7	0.80192
O88573	Aff1	AFF1	1096	single	K.VAQAPS#PCTAR.S	146.755	124.3	166.606	196.818	210.299	244.519	184.348	59.1795	137.156	1.43299	0.1	0.449082	0.934595	1	1
O88573	Aff1	AFF1	382	single	K.DPLHVS#PATQSQK.Q	798.085	1065.18	975.071	1067.28	787.919	820.914	1123.06	778.731	1107	0.841902	1	1	1.1353	0.7	0.80192
Q9ESC8	Aff4	AFF4	1055	single	K.AVGMPSPVS#PK.L	822.954	1027.61	977.826	1047.76	1074.92	1056.86	1534.94	2073.21	1678.98	1.08083	0.1	0.449082	1.71705	0.1	0.218592
Q9ESC8	Aff4	AFF4	698	single	K.ELLS#PLSEPDDRYPLIVK.I	154.908	237.627	174.096	297.16	209.135	185.618	396.259	383.392	355.793	1.20127	0.4	0.742218	2.20219	0.1	0.218592
Q9ESC8	Aff4	AFF4	1065	single	K.LSPGNSGS#YSSGGSSASASGSSVTIPQK.I	211.778	297.965	348.515	377.654	311.345	250.131	651.56	1150.6	616.46	1.0449	0.7	0.902214	2.1867	0.1	0.218592
Q9ESC8	Aff4	AFF4	207	single	K.S#PRDPDANWDSPSR.G	159.794	138.12	157.537	180.766	173.303	140.588	182.113	335.956	249.253	1.10008	0.4	0.742218	1.58219	0.1	0.218592
Q9ESC8	Aff4	AFF4	809	single	K.DLLPS#PAGPILSK.D	580.831	643.562	716.699	769.039	675.798	677.783	702.418	987.126	767.266	1.05317	0.4	0.742218	1.19222	0.2	0.344665
Q9ESC8	Aff4	AFF4	666	single	K.YPES#NRTPVKPSSVEEEDSFFR.Q	315.187	326.06	313.24	410.136	351.21	403.638	371.987	473.936	321.091	1.28063	0.1	0.449082	1.18021	0.2	0.344665
Q9ESC8	Aff4	AFF4	173	single	R.S#SSPGKPQAVSSLSSSHSR.S	103.934	491.017	428.15	812.382	229.46	448.599	176.412	157.693	145.746	1.04776	0.7	0.902214	0.368313	0.7	0.80192
Q9ESC8	Aff4	AFF4	32	single	R.NQEIQQGEDAFPPSS#PLFAEPYK.V	43.1493	40.7294	40.4901	56.8589	45.4733	41.0431	41.4769	65.8576	51.3496	1.11648	0.2	0.571462	1.26075	0.2	0.344665
Q9ESC8	Aff4	AFF4	482	single	K.VNPHKVS#PASSVDSNIPSSQAYK.K	338.873	413.588	478.39	344.751	356.541	387.485	449.868	200.181	385.556	0.862066	0.7	0.902214	0.932221	0.7	0.80192
Q9ESC8	Aff4	AFF4	486	single	K.VNPHKVSPAS#S#VDSNIPSSQAYK.K	362.458	362.135	402.806	339.114	318.733	351.416	447.595	175.247	398.951	0.935596	0.1	0.449082	1.10068	1	1
Q80WT5	Aftph	AFTIN	412	single	K.SPDPDPTGQNALDDSAAS#MK.N	102.1	89.1362	44.1093	201.806	159.345	145.558	29.9644	38.6198	36.9219	1.78766	0.1	0.449082	0.414219	0.1	0.218592
Q80WT5	Aftph	AFTIN	124	single	K.TLDPS#IDGMESLEDLDK.V	26.5519	33.3522	24.3244	43.982	42.9368	42.665	12.5034	21.2409	18.6619	1.61709	0.1	0.449082	0.702847	0.1	0.218592
Q80WT5	Aftph	AFTIN	506	single	R.QTSDGLS#EECPLAGESGGK.D	368.68	339.243	372.856	379.364	396.819	322.724	279.909	274.917	221.398	1.02898	0.7	0.902214	0.745679	0.1	0.218592
Q80WT5	Aftph	AFTIN	395	single	K.S#PDPDPTGQNALDDSAASMK.N	336.157	306.756	372.459	380.014	322.691	292.682	244.041	289.599	304.32	0.959942	1	1	0.8615	0.1	0.218592
Q80WT5	Aftph	AFTIN	679	single	K.HLLETHS#SPAK.T	258.316	22.7072	88.4561	290.341	111.598	229.099	75.621	96.2115	37.4183	2.58998	0.4	0.742218	0.854899	1	1
Q3UPL5	Ag2	CK096	217	single	R.S#TQSLSLQR.E	899.403	1154.79	883.431	1745.63	1722.41	1848.95	296.629	466.783	496.005	1.94088	0.1	0.449082	0.518993	0.1	0.218592
Q3UPL5	Ag2	CK096	196	single	K.TQPVTFDEIQEVEEEGVS#PM*EEEK.A	298.115	215.204	273.199	199.385	267.814	245.707	160.96	94.6596	193.845	0.899369	0.4	0.742218	0.589166	0.1	0.218592
Q8BXK8	Agap1	AGAP1	101	single	R.YLTGTYVQEES#PEGGR.F	27.5147	36.7177	35.8867	44.7974	46.4543	43.9128	135.669	96.9563	117.053	1.2483	0.1	0.449082	3.26173	0.1	0.218592
Q8BXK8	Agap1	AGAP1	521	single	K.LDPPPS#PHANR.K	3416.1	2416.38	3048.63	4639.61	3361.97	4431.04	2241.51	3149.02	2425.78	1.45345	0.2	0.571462	0.795694	0.7	0.80192
Q8BXK8	Agap1	AGAP1	422	single	R.ATSACAPISS#PK.T	223.786	293.322	284.495	353.979	253.645	275.522	283.793	140.769	263.364	0.968461	1	1	0.925726	0.4	0.557775
Q8K2K6	Agfg1	AGFG1	177	single	K.GT#PSQSPVVGR.S	43.9953	37.9811	39.6599	87.6584	70.9307	58.6915	26.523	23.6877	29.9364	1.78848	0.1	0.449082	0.66876	0.1	0.218592
Q8K2K6	Agfg1	AGFG1	181	single	K.GT#PSQS#PVVGR.S	499.089	258.579	336.544	562.634	491.259	448.129	205.248	233.051	264.453	1.45972	0.4	0.742218	0.692482	0.2	0.344665
Q8K2K6	Agfg1	AGFG1	162	single	K.S#LLGESAPALHLNK.G	31.1116	67.0656	25.5775	102.497	71.8786	277.872	15.8238	41.5298	34.9458	3.29448	0.1	0.449082	1.12324	1	1
Q7TN31	Aggf1	AGGF1	308	single	K.VCSVEYINCS#EDEHSGNVK.K	371.286	422.087	389.451	549.956	333.55	381.981	190.288	118.822	129.223	0.980821	1	1	0.331807	0.1	0.218592
Q8C0I1	Agps	ADAS	57	single	R.AASAAGAS#PAATPAAPESGTIPK.K	146.2	167.558	206.793	239.12	203.858	156.291	385.638	251.378	461.346	1.21664	0.7	0.902214	2.30152	0.1	0.218592
O88312	Agr2	AGR2	161	single	R.LYAYEPSDTALLY#DNMK.K	59.8062	65.0101	64.7685	54.2679	53.1821	54.5912	66.3332	95.9397	74.2659	0.837875	0.1	0.449082	1.14664	0.1	0.218592
M0QWP1	Agrn	M0QWP1	678	single	R.AGPCEPAECGSGGSGS#GEDNACEQELCR.Q	29.3973	31.166	32.3256	27.5746	23.6807	19.2764	24.8479	19.9059	21.8677	0.759825	0.1	0.449082	0.701652	0.1	0.218592
Q8CJF7	Ahctf1	ELYS	2185	single	K.GS#SWSPPPVEIK.L	147.126	154.763	187.991	218.048	201.758	217.469	238.128	301.604	244.864	1.40517	0.1	0.449082	1.58219	0.1	0.218592
Q8CJF7	Ahctf1	ELYS	1218	single	R.TTPLASPSLS#PGR.S	1052.12	1111.48	1284.53	1323.09	1062.7	1072.57	1633.32	2214.24	1932.63	0.964996	1	1	1.73879	0.1	0.218592
Q8CJF7	Ahctf1	ELYS	1080	single	R.NGVSLFNS#PK.T	442.461	649.572	711.367	555.916	810.765	545.659	1014.62	1560.67	1156.76	0.855819	1	1	1.78081	0.1	0.218592
Q8CJF7	Ahctf1	ELYS	1928	single	R.EVS#VSS#VTEEPK.L	913.017	873.183	1013.46	1123.31	1401.49	1214.78	1336.93	2294.94	1683.11	1.33052	0.1	0.449082	1.84346	0.1	0.218592
Q8CJF7	Ahctf1	ELYS	1725	single	K.EPHAETVNTS#QNDDMVSSR.T	64.8812	97.8487	109.265	119.433	85.6603	108.471	60.2379	48.4983	79.9685	1.10856	0.7	0.902214	0.615623	0.2	0.344665
Q8CJF7	Ahctf1	ELYS	1931	single	R.EVSVSS#VTEEPK.L	695.202	624.987	780.592	818.625	955.122	935.636	680.244	928.672	802.484	1.34585	0.1	0.449082	1.15432	0.4	0.557775
Q8CJF7	Ahctf1	ELYS	1507	single	K.ENVGLPEES#PR.I	900.803	852.392	1069.69	1274.65	905.126	905.076	1073.92	1557.62	1211.86	1.0048	0.4	0.742218	1.34531	0.1	0.218592
Q8CJF7	Ahctf1	ELYS	1466	single	K.ESVANTVADVESSGS#TSSK.C	88.5011	94.3312	89.9767	115.5	71.1573	81.7084	56.594	64.5315	80.7811	0.908106	0.7	0.902214	0.717203	0.1	0.218592
Q8CJF7	Ahctf1	ELYS	1087	single	K.TEQPS#PVVHSFPHPELPEAFVGTPISNTSQR.I	23.7199	50.3865	50.1917	48.779	36.1714	52.3113	24.1846	34.7788	31.3094	0.971854	1	1	0.623795	0.7	0.80192
Q8CJF7	Ahctf1	ELYS	1541	single	K.NLS#FDELYPLGAEK.L	129.724	153.452	180.58	226.967	128.56	176.074	164.631	197.38	171.055	1.14742	1	1	1.11471	0.4	0.557775
Q8CJF7	Ahctf1	ELYS	1792	single	K.VAPENQLTAQS#PPAPR.R	199.653	196.542	181.475	199.909	187.495	203.794	187.422	181.619	229.628	1.01713	0.4	0.742218	0.953594	1	1
Q68FL4	Ahcyl2	SAHH3	109	single	R.DGGEALVS#PDGTVTEAPR.T	349.243	432.585	485.974	439.983	366.388	398.048	371.563	474.947	466.638	0.920161	1	1	1.07872	1	1
Q6PAL7	Ahdc1	AHDC1	892	single	K.AS#PVAVGSSGAGADPSFQPVLPSR.Q	48.4444	48.8987	44.2802	79.3125	67.6693	64.4162	38.7368	34.508	47.316	1.39684	0.1	0.449082	0.799614	0.2	0.344665
Q6PAL7	Ahdc1	AHDC1	99	single	R.AARPVSQAHCPS#PAPDNSSLR.H	19.9825	24.5145	26.2977	41.6228	24.0005	35.6221	21.0575	15.8413	11.3035	1.4531	0.4	0.742218	0.646202	0.2	0.344665
Q6PAL7	Ahdc1	AHDC1	1392	single	K.AY#S#PTCSPTLGFK.E	201.469	170.541	167.287	231.19	203.445	224.578	202.622	162.463	134.762	1.31686	0.1	0.449082	0.952636	0.7	0.80192
Q6PAL7	Ahdc1	AHDC1	597	single	K.LASPQPS#YAADANDSK.A	619.523	566.652	554.572	708.566	866.296	660.49	483.41	719.69	492.618	1.25044	0.1	0.449082	0.869349	0.7	0.80192
Q6PAL7	Ahdc1	AHDC1	1467	single	K.GTAYWYPPGSAARS#PPYEGK.V	301.149	351.062	308.631	406.298	454.561	335.593	343.05	472.327	396.263	1.31645	0.2	0.571462	1.28394	0.2	0.344665
E9Q616	Ahnak	E9Q616	818	single	K.IS#MPDVDLHLK.G	351.054	298.18	182.269	636.858	904.885	807.359	61.4817	194.734	115.922	2.70763	0.1	0.449082	0.388764	0.2	0.344665
E9Q616	Ahnak	E9Q616	5512	single	K.GGVTGSPEASISGS#K.G	906.612	1272.38	1045.41	1830.4	1897.38	1549.6	648.135	736.275	846.474	1.75089	0.1	0.449082	0.704291	0.1	0.218592
E9Q616	Ahnak	E9Q616	1067	single	K.VS#LPDVDLDLK.G	145.12	127.212	92.7705	194.176	244.694	225.728	56.3216	134.097	90.9316	1.77442	0.1	0.449082	0.714802	0.4	0.557775
E9Q616	Ahnak	E9Q616	5303	single	K.GS#GLGLHGAVPDIGVK.G	282.854	401.362	310.944	717.889	573.562	686.425	184.134	319.391	268.025	2.20755	0.1	0.449082	0.861973	0.4	0.557775
E9Q616	Ahnak	E9Q616	3042	single	K.GDVDIS#GPK.L	643.887	604.648	590.142	826.299	896.677	842.109	363.142	660.255	436.149	1.39272	0.1	0.449082	0.721327	0.7	0.80192
E9Q616	Ahnak	E9Q616	1321	single	K.IS#M*PDLHLK.G	211.265	193.059	184.452	484.901	401.912	540.289	102.558	321.448	131.168	2.51167	0.1	0.449082	0.679419	0.7	0.80192
E9Q616	Ahnak	E9Q616	222	single	R.LPSGSGPAS#PTTGS#AVDIR.A	394.395	384.665	321.483	587.391	674.229	684.867	302.048	379.148	371.048	1.75277	0.1	0.449082	0.9646	0.4	0.557775
E9Q616	Ahnak	E9Q616	1122	single	K.APEVDVQGPEWS#LK.M	69.4059	69.7312	43.9202	172.387	130.82	175.648	28.1565	91.2655	61.6826	2.48375	0.1	0.449082	0.888723	1	1
E9Q616	Ahnak	E9Q616	5536	single	K.ASLGSLEGEVEAEASS#PK.G	1257.91	1255.79	1315.03	1350.99	1262.91	1229.57	1485.97	1646.63	1733.65	1.00398	1	1	1.30901	0.1	0.218592
E9Q616	Ahnak	E9Q616	217	single	R.LPSGSGPAS#PTTGSAVDIR.A	681.964	683.71	654.526	876.94	762.121	732.232	909.115	998.429	1033.95	1.11754	0.1	0.449082	1.46405	0.1	0.218592
E9Q616	Ahnak	E9Q616	110	single	R.S#SEVVLSGDDEDYQR.I	278.5	288.524	319.636	479.869	481.41	407.686	279.045	408.388	308.2	1.66319	0.1	0.449082	1.0682	0.7	0.80192
E9Q616	Ahnak	E9Q616	136	single	R.LRS#EDGVEGDLGETQSR.T	1176.79	1056.39	1352.84	2014.15	1734.89	1406.39	2368.37	4085.64	2769.1	1.47426	0.1	0.449082	2.35311	0.1	0.218592
E9Q616	Ahnak	E9Q616	385	single	K.GPQITGPS#LEGDLGLK.G	189.409	150.116	103.906	215.549	299.594	187.547	45.1948	114.333	80.5583	1.43588	0.2	0.571462	0.536641	0.2	0.344665
E9Q616	Ahnak	E9Q616	5231	single	K.GPQISAPS#MDFNLEGPK.V	70.2202	74.0983	51.0772	110.601	180.588	104.57	41.8804	54.9829	57.4574	1.57506	0.1	0.449082	0.783008	0.4	0.557775
E9Q616	Ahnak	E9Q616	4300	single	K.TPQISMS#DIDLNVK.G	62.1073	61.003	36.5387	154.846	122.887	141.923	40.5382	122.926	62.1854	2.3265	0.1	0.449082	1.01938	0.4	0.557775
E9Q616	Ahnak	E9Q616	5567	single	R.EFSAPST#PTGTLEFAGGDAK.G	170.956	198.97	183.03	271.424	263.619	251.865	310.143	487.861	320.704	1.4403	0.1	0.449082	1.75219	0.1	0.218592
E9Q616	Ahnak	E9Q616	3017	single	K.MPDMHVS#MPK.I	423.493	605.35	322.86	1118.21	698.404	1259.71	265.253	570.913	482.346	2.64044	0.1	0.449082	1.13897	1	1
E9Q616	Ahnak	E9Q616	5377	single	K.GPQVSS#SLNLDTSK.L	46.2672	35.923	33.8049	66.2194	63.4617	67.3781	27.5202	57.1557	35.1128	1.84337	0.1	0.449082	0.977446	1	1
E9Q616	Ahnak	E9Q616	5049	single	K.M*EGGSTEIGAQMPSLEGGLSTS#DMK.L	205.951	228.209	217.96	341.242	323.163	279.636	194.416	289.125	235.978	1.48267	0.1	0.449082	1.08266	0.7	0.80192
E9Q616	Ahnak	E9Q616	178	single	K.DIDITS#PEFMIK.I	494.408	577.949	606.237	977.188	641.021	818.177	817.176	1074.41	917.309	1.41566	0.1	0.449082	1.58718	0.1	0.218592
E9Q616	Ahnak	E9Q616	4789	single	K.TPTVDVTVPEAELNVDS#PEINIGGK.S	66.4709	87.4795	79.8033	150.557	109.929	126.044	83.8495	122.356	105.457	1.57943	0.1	0.449082	1.32146	0.2	0.344665
E9Q616	Ahnak	E9Q616	1573	single	K.IS#MPDVSLNLK.G	501.202	532.729	359.871	906.884	553.446	771.772	251.012	492.318	370.272	1.53984	0.1	0.449082	0.738767	0.4	0.557775
E9Q616	Ahnak	E9Q616	2000	single	K.GPS#VDVEVPDVDLECPDAK.L	1122.46	1163.15	1315.64	1670.38	1860.72	1364.78	505.85	1307.3	664.809	1.43608	0.1	0.449082	0.571558	0.4	0.557775
E9Q616	Ahnak	E9Q616	3253	single	K.GDINIEGPSM*NIEGPELNVECPEGS#LK.G	306.283	349.88	280.39	629.606	417.54	486.675	294.228	434.172	325.624	1.58897	0.1	0.449082	1.06315	0.7	0.80192
E9Q616	Ahnak	E9Q616	2438	single	K.IS#MPDFDLHLK.G	158.605	153.608	139.396	509.308	323.296	506.556	117.349	421.606	162.871	3.29772	0.1	0.449082	1.06031	0.7	0.80192
E9Q616	Ahnak	E9Q616	4890	single	K.AEAPLPS#PK.L	1951.9	2061.82	2356.21	4215.6	3896.98	3652.42	3111.18	7381.22	5294.44	1.89007	0.1	0.449082	2.56785	0.1	0.218592
E9Q616	Ahnak	E9Q616	1894	single	K.IS#MPDVDLNFK.G	17.7995	22.0866	13.8918	29.8638	23.4152	20.2159	11.6919	18.2105	14.4623	1.3155	0.2	0.571462	0.812514	0.7	0.80192
E9Q616	Ahnak	E9Q616	3744	single	K.VDLDVS#GPK.V	905.119	760.683	775.033	1188.94	1353.77	1618.25	646.843	1368.67	774.785	1.74673	0.1	0.449082	0.999679	1	1
E9Q616	Ahnak	E9Q616	5041	single	K.M*EGGSTEIGAQMPS#LEGGLSTSDMK.L	236.856	241.267	245.107	289.18	241.011	319.013	227.142	246.105	229.087	1.19859	0.4	0.742218	0.949514	0.7	0.80192
E9Q616	Ahnak	E9Q616	3139	single	K.MPFLSIS#SPK.V	187.21	185.234	126.797	249.596	209.364	246.482	118.523	217.63	160.82	1.33065	0.1	0.449082	0.868201	1	1
E9Q616	Ahnak	E9Q616	5555	single	R.S#NS#FSDEREFSAPSTPTGTLEFAGGDAK.G	660.953	656.529	721.265	1016.11	725.324	903.263	522.215	798.986	614.988	1.36661	0.1	0.449082	0.930457	0.7	0.80192
E9Q616	Ahnak	E9Q616	4950	single	K.VQANLDT#PDINIEGPEAK.I	41.7069	74.2623	47.0077	81.2493	73.6301	95.1913	59.5643	80.3732	86.1024	1.72843	0.2	0.571462	1.70979	0.2	0.344665
E9Q616	Ahnak	E9Q616	5535	single	K.AS#LGS#LEGEVEAEAS#SPK.G	94.7619	87.1115	140.466	107.672	60.8371	51.7841	112.366	119.392	145.486	0.641999	0.4	0.742218	1.25992	0.4	0.557775
E9Q616	Ahnak	E9Q616	1036	single	K.LDIS#APDLNLEGPEGK.L	948.249	821.906	754.238	1308.85	1059.19	1238.22	511.667	1171.12	771.309	1.50652	0.1	0.449082	0.93844	1	1
E9Q616	Ahnak	E9Q616	517	single	K.ISMQDVDLSLGS#CK.L	62.4304	59.3368	63.0119	138.207	74.7285	92.7546	42.1816	88.0023	48.705	1.48573	0.1	0.449082	0.780148	0.7	0.80192
E9Q616	Ahnak	E9Q616	4905	single	K.VPDVDIS#SPGINVEAPDIHMK.A	145.55	169.17	182.672	344.545	260.237	422.786	236.863	596.651	311.18	2.03668	0.1	0.449082	1.83946	0.1	0.218592
E9Q616	Ahnak	E9Q616	5325	single	K.GPSFNVAS#PESDFGVSLK.G	52.1154	55.5029	56.0831	79.3265	77.9808	104.624	53.8699	103.983	66.5892	1.42923	0.1	0.449082	1.19974	0.4	0.557775
E9Q616	Ahnak	E9Q616	5553	single	R.S#NS#FSDEREFSAPSTPTGTLEFAGGDAK.G	261.65	329.627	351.766	499.088	291.769	408.509	367.123	667.831	523.645	1.23931	0.4	0.742218	1.5886	0.1	0.218592
E9Q616	Ahnak	E9Q616	4208	single	K.CPTVDIDT#PDVNIEVPEGK.L	62.5571	67.5373	71.4353	130.487	102.519	204.737	83.1857	168.166	77.294	1.93207	0.1	0.449082	1.2317	0.1	0.218592
E9Q616	Ahnak	E9Q616	42	single	R.DDGVFVQEVMQNS#PAAR.T	45.2277	58.4266	61.2027	107.144	72.7439	61.6637	57.377	59.8994	63.6123	1.24505	0.1	0.449082	1.02521	0.7	0.80192
E9Q616	Ahnak	E9Q616	5522	single	K.AS#LGS#LEGEVEAEASSPK.G	631.55	573.675	599.398	660.252	667.276	615.704	621.679	737.965	667.037	1.10153	0.2	0.571462	1.11285	0.2	0.344665
E9Q616	Ahnak	E9Q616	94	single	K.GDRS#PEPGQTWTHEVFSSR.S	1002.53	1870.95	1945.64	2168.38	1544.24	1421.26	2045.92	3623.71	2236.51	0.825381	1	1	1.19539	0.1	0.218592
E9Q616	Ahnak	E9Q616	1421	single	K.VDIEAPDVS#IEGPEGK.L	127.022	152.524	137.713	225.969	167.161	194.783	98.4674	198.185	161.116	1.41441	0.1	0.449082	1.16994	0.7	0.80192
E9Q616	Ahnak	E9Q616	5099	single	K.GDLGASS#PSM*K.L	2503.81	2725.7	2948.73	3918.37	3995.73	3140.67	2560.69	4268.73	3153.07	1.43756	0.1	0.449082	1.15679	0.4	0.557775
E9Q616	Ahnak	E9Q616	796	single	K.VEVSAPDVSIEGS#EGK.L	103.66	91.5662	81.3296	120.658	99.6756	123.643	103.902	219.87	130.377	1.31772	0.2	0.571462	1.42385	0.1	0.218592
E9Q616	Ahnak	E9Q616	4678	single	K.GPGLDFEGPDAKLS#GPNLK.M	54.2205	46.8192	43.0288	60.6355	47.6526	78.3106	28.3405	60.1538	34.7556	1.2951	0.2	0.571462	0.742336	0.7	0.80192
E9Q616	Ahnak	E9Q616	213	single	R.LPSGS#GPASPTTGSAVDIR.A	604.409	558.452	606.671	702.266	630.473	543.196	625.811	708.53	687.606	1.04312	0.7	0.902214	1.13765	0.1	0.218592
E9Q616	Ahnak	E9Q616	5607	single	K.GHYEVTGS#DDEAGK.L	5260.1	3607.09	4895.96	9061.54	5729.05	5772.15	4664.2	7276.14	4760.52	1.17896	0.1	0.449082	0.972337	1	1
E9Q616	Ahnak	E9Q616	5328	single	K.GPSFNVASPES#DFGVSLK.G	19.0096	34.7703	30.3512	41.732	35.5517	40.1777	28.8014	48.7833	34.5278	1.32376	0.1	0.449082	1.13761	0.7	0.80192
E9Q616	Ahnak	E9Q616	5617	single	K.LQGS#GVSLASK.K	2942.62	1681.81	3984.65	1989.15	2144.11	1814.57	1801.35	2173.05	2001.1	0.675979	0.7	0.902214	0.680039	0.7	0.80192
E9Q616	Ahnak	E9Q616	4342	single	K.LDIDT#PDIDIHGPEGK.L	219.588	212.2	173.598	403.122	424.944	602.169	443.256	2106.32	479.604	2.00256	0.1	0.449082	2.26015	0.1	0.218592
E9Q616	Ahnak	E9Q616	211	single	R.LPS#GSGPASPTTGSAVDIR.A	1683.26	1479.23	1727.57	1710.34	1689.83	1794.17	1553.15	2225.37	2011.59	1.01609	0.4	0.742218	1.19505	0.4	0.557775
E9Q616	Ahnak	E9Q616	3140	single	K.MPFLSISS#PK.V	486.162	682.154	463.294	1001.56	721.164	1890.3	616.268	2097.98	918.102	2.06013	0.1	0.449082	1.88847	0.2	0.344665
E9Q616	Ahnak	E9Q616	19	single	R.ELLLPNWQGS#GSHGLTIAQR.D	115.538	121.078	124.994	153.113	140.997	120.172	118.689	153.291	109.446	1.16452	0.4	0.742218	0.980274	1	1
E9Q616	Ahnak	E9Q616	893	single	K.AES#PEMEVNLPK.S	3641.3	3025.15	3294.57	3898.23	3154.99	3256.33	2879.06	5121.12	4006.02	0.988393	1	1	1.21595	0.7	0.80192
E9Q616	Ahnak	E9Q616	116	single	R.SSEVVLS#GDDEDYQR.I	1324.59	1419.35	1647.38	1724.12	1516.2	1437.05	1321.09	1506.04	1663.71	1.06823	0.4	0.742218	1.06108	1	1
E9Q616	Ahnak	E9Q616	4686	single	K.MPS#LEVSVPK.I	1648.67	1561.62	1761.93	1828.01	1984.11	1659.99	934.601	2341.17	1506.59	1.10878	0.2	0.571462	0.913821	0.7	0.80192
E9Q616	Ahnak	E9Q616	5504	single	K.GGVTGS#PEASISGSK.G	2099.06	3235.3	2375.29	3013.78	2276.98	1704.31	2574.7	1949.02	3228.28	0.95861	0.7	0.902214	1.08395	1	1
E9Q616	Ahnak	E9Q616	1169	single	K.LDIETSDVS#LEGPEGK.L	914.834	819.176	928.624	1065.55	860.03	819.302	548.403	1563.44	839.421	0.940094	1	1	0.917566	1	1
E9Q616	Ahnak	E9Q616	5525	single	K.AS#LGS#LEGEVEAEASSPK.G	3162.58	3181.31	3142.85	3388.96	3219.03	3078.44	2915.97	3087.37	3635.34	1.01785	0.7	0.902214	0.976219	0.7	0.80192
E9PYB0	Ahnak2	E9PYB0	1012	single	K.MPS#FGVSAPGKPSQEASLEVGAPK.V	194.282	192.79	195.508	238.65	240.09	158.602	67.7903	90.9606	102.358	1.22837	0.7	0.902214	0.468189	0.1	0.218592
E9PYB0	Ahnak2	E9PYB0	507	single	K.MPSFGVS#APGKPSLEASLEVGAPK.V	37.2574	43.807	33.3532	28.8644	38.5362	38.0781	15.9273	25.2054	22.9216	1.02203	1	1	0.615223	0.1	0.218592
E9PYB0	Ahnak2	E9PYB0	288	single	R.DMSPT#STDTEVHR.T	1147.39	1150.66	1565.51	1106.71	810.266	881.014	779.098	955.231	998.089	0.765657	0.1	0.449082	0.830156	0.1	0.218592
E9PYB0	Ahnak2	E9PYB0	540	single	K.T#PDLSVQLPSADLELK.A	141.255	110.223	147.897	115.057	69.2975	127.527	54.73	103.392	92.7336	0.814536	0.4	0.742218	0.656498	0.1	0.218592
E9PYB0	Ahnak2	E9PYB0	286	single	R.DM*S#PTSTDTEVHR.T	1918.91	1886.2	2621.73	2015.06	1568.85	1622.3	1431.24	1582.79	1780.94	0.845425	0.4	0.742218	0.824837	0.1	0.218592
E9PYB0	Ahnak2	E9PYB0	1220	single	K.T#PDLSVQLPSADLDLK.A	91.9815	73.0598	102.681	86.0236	51.9559	93.8841	40.4134	69.9441	63.581	0.935227	0.7	0.902214	0.691237	0.1	0.218592
F7DBB3	Ahnak2	F7DBB3	1261	single	R.MPPASLEQSLEAS#PISK.V	49.8369	49.3201	47.3775	37.1562	32.5895	37.1876	25.5164	40.8705	37.6639	0.753369	0.1	0.449082	0.763663	0.1	0.218592
P29699	Ahsg	FETUA	312	single	R.HAFSPVAS#VES#AS#GETLHSPK.V	433.989	1133.51	904.898	1059.04	781.743	568.55	293.946	294.778	325.505	0.863901	1	1	0.325759	0.1	0.218592
P29699	Ahsg	FETUA	138	single	R.VMHTQCHSTPDS#AEDVR.K	634.066	1044.67	914.494	1047.93	557.58	548.497	557.973	698.234	320.576	0.609715	0.7	0.902214	0.610144	0.2	0.344665
P29699	Ahsg	FETUA	317	single	R.HAFSPVASVES#AS#GET#LHSPK.V	53.5532	180.3	111.483	148.646	84.9974	61.4751	56.4145	48.8337	56.0107	0.762424	1	1	0.502414	0.4	0.557775
E9PVP1	Aim1	E9PVP1	115	single	R.VPEAVPS#SPGSGSR.A	158.396	160.155	167.772	226.933	238.694	227.723	181.66	140.614	202.599	1.42189	0.1	0.449082	1.13427	0.7	0.80192
E9PVP1	Aim1	E9PVP1	19	single	K.S#TDSPGADAVAPESAAK.D	73.7703	73.3036	87.0651	246.682	251.705	195.61	338.358	705.692	449.936	3.34391	0.1	0.449082	6.09915	0.1	0.218592
E9PVP1	Aim1	E9PVP1	586	single	R.EAQLPSCHSNEPEVVSVTTCVPQHEDAPDT#SPK.D	18.2929	27.0755	21.489	39.3979	33.595	33.5295	29.2737	39.8583	40.3484	1.56336	0.1	0.449082	1.85482	0.1	0.218592
E9PVP1	Aim1	E9PVP1	507	single	K.TPISKPGVGEAS#PPSTPEHSPETMGK.D	253.948	397.22	252.899	460.172	441.445	359.17	439.552	543.084	498.849	1.73833	0.2	0.571462	1.96438	0.1	0.218592
E9PVP1	Aim1	E9PVP1	652	single	R.SHAEGPQRPGQDATS#PLT#PTR.L	81.7094	96.787	103.608	176.933	99.3058	154.414	138.162	171.191	185.717	1.59541	0.2	0.571462	1.76874	0.1	0.218592
E9PVP1	Aim1	E9PVP1	655	single	R.SHAEGPQRPGQDATSPLT#PTR.L	73.8433	97.1634	84.3712	157.124	100.149	181.741	124.539	193.975	156.904	1.8623	0.1	0.449082	1.85969	0.1	0.218592
E9PVP1	Aim1	E9PVP1	633	single	K.APPIQSSSGMPQTAEFILTHS#PSSR.S	21.4148	46.4866	29.9045	72.2547	38.0694	55.09	39.3916	39.687	35.3617	1.8422	0.2	0.571462	1.31725	0.7	0.80192
E9PVP1	Aim1	E9PVP1	22	single	K.STDS#PGADAVAPESAAK.D	89.8958	105.04	91.351	118.076	132.979	109.844	121.605	83.1126	123.269	1.29255	0.1	0.449082	1.33118	0.7	0.80192
B7ZCC2	Aim1l	B7ZCC2	422	single	K.GEVTVPEPPPSPSS#PR.R	325.5	387.34	307.549	352.913	372.073	373.038	252.686	197.126	310.913	1.14308	0.7	0.902214	0.776302	0.2	0.344665
B7ZCC2	Aim1l	B7ZCC2	439	single	K.AAPSSQSPCAPAS#PK.S	528.44	237.543	359.132	683.642	499.21	669.251	402.304	240.306	321.427	1.86352	0.2	0.571462	0.895011	1	1
B7ZCC2	Aim1l	B7ZCC2	529	single	K.ETVES#PTFPAPLPPK.Q	140.995	146.98	133.468	151.693	199.993	253.367	158.704	139.902	206.872	1.41844	0.1	0.449082	1.1256	0.4	0.557775
B7ZCC2	Aim1l	B7ZCC2	554	single	R.DSPGNFLSS#PTPK.G	221.429	231.822	261.952	288.897	330.883	648.001	319.506	380.589	380.469	1.42731	0.1	0.449082	1.64121	0.1	0.218592
Q8R010	Aimp2	AIMP2	36	single	K.TTS#PATDAGHVQETSEPSLQALESR.Q	54.5593	97.1193	93.1344	107.983	73.391	82.3369	88.7144	69.7164	82.9249	0.884066	1	1	0.890379	0.7	0.80192
Q9WTP6	Ak2	KAD2	58	single	R.AMVASGS#ELGK.K	340.702	329.897	314.535	363.932	300.589	273.939	453.096	431.267	402.816	0.911161	0.7	0.902214	1.30728	0.1	0.218592
Q9WTP6	Ak2	KAD2	151	single	R.S#YHEEFNPPK.E	795.471	652.239	464.629	934.743	590.49	665.234	372.534	621.217	438.394	1.01992	0.7	0.902214	0.672136	0.2	0.344665
O08715	Akap1	AKAP1	55	single	K.DRRLS#EEACPGVLSVAPTVTQPPGR.E	787.785	891.954	887.458	862.65	712.406	837.499	437.909	306.399	453.854	0.943705	0.4	0.742218	0.493442	0.1	0.218592
O08715	Akap1	AKAP1	103	single	R.SES#SGNLPSVADTR.S	904.483	1195.76	1010.52	1732.78	1462.02	1440.97	585.437	533.732	619.381	1.4468	0.1	0.449082	0.57934	0.1	0.218592
O08715	Akap1	AKAP1	376	single	R.TGAT#ASPSAEALPPK.T	951.944	1124.23	827.771	1084.66	1316.76	1198.47	846.897	610.436	960.496	1.25897	0.2	0.571462	0.88965	0.7	0.80192
O08715	Akap1	AKAP1	101	single	R.S#ESSGNLPSVADTR.S	286.067	317.386	311.123	454.791	371.52	371.366	323.755	454.298	469.522	1.19412	0.1	0.449082	1.46019	0.1	0.218592
O08715	Akap1	AKAP1	395	single	K.TYVSCLSS#PLSGPTK.D	99.9633	125.137	124.137	157.168	97.5365	144.55	119.221	109.782	160.613	1.16444	0.7	0.902214	0.960401	1	1
O88845	Akap10	AKA10	187	single	K.QSSLAEPVS#PSK.R	313.982	434.625	488.211	400.641	404.771	421.646	570.156	647.329	639.721	0.93131	0.7	0.902214	1.47189	0.1	0.218592
E9Q774	Akap11	E9Q774	854	single	R.STCLPSELNPCNQNDFKPTNGDIDRQS#PSK.L	315.869	344.439	395.588	333.356	217.214	264.32	207.092	124.651	117.142	0.767391	0.2	0.571462	0.361896	0.1	0.218592
E9Q774	Akap11	E9Q774	912	single	K.ACSPS#LCDQAAPQENK.A	135.853	136.589	144.498	134.803	100.02	116.292	94.5378	66.0298	54.1302	0.851404	0.1	0.449082	0.483421	0.1	0.218592
E9Q774	Akap11	E9Q774	1092	single	R.NVIPDT#PPSTPLVPSQTSSEWDIK.T	28.6206	40.3569	29.0589	33.8306	30.4876	21.9857	30.2801	42.8285	38.1213	1.04917	1	1	1.31187	0.4	0.557775
E9Q774	Akap11	E9Q774	1163	single	R.SLS#EEVESSEGEEHPGMHVK.A	433.276	674.98	884.389	677.777	471.392	518.426	451.223	575.675	469.24	0.768061	1	1	0.69519	0.7	0.80192
E9Q774	Akap11	E9Q774	21	single	K.S#FSEDVFR.S	237.306	311.548	247.219	343.796	230.599	303.674	209.387	283.548	246.592	1.22836	1	1	0.997463	0.7	0.80192
E9Q774	Akap11	E9Q774	133	single	R.VS#PTLPGLR.I	421.194	456.294	406.788	518.986	337.319	385.396	441.927	325.905	348.625	0.915009	0.7	0.902214	0.827707	0.4	0.557775
Q9WTQ5	Akap12	AKA12	371	single	K.VELPLEDQVGDLEALS#EK.C	237.245	191.924	144.108	217.697	161.909	169.341	37.1344	52.7427	38.4014	0.882337	1	1	0.200087	0.1	0.218592
Q9WTQ5	Akap12	AKA12	570	single	K.GPS#EAPQEAEAEEGATSDGEK.K	170.177	168.479	135.263	198.572	131.312	159.027	27.9293	39.0603	64.4366	0.943897	1	1	0.23184	0.1	0.218592
Q9WTQ5	Akap12	AKA12	637	single	K.SATLSSTESTAS#GMQDEVR.A	559.801	665.769	467.781	877.161	665.323	801.47	150.806	197.51	204.481	1.43171	0.2	0.571462	0.352821	0.1	0.218592
Q9WTQ5	Akap12	AKA12	1357	single	K.ALGSLEGSPS#LPDQDK.A	775.967	493.212	603.525	441.879	551.53	506.445	206.178	190.841	224.951	0.839144	0.4	0.742218	0.341623	0.1	0.218592
Q9WTQ5	Akap12	AKA12	1059	single	K.VEEVEEDS#EVLATEK.E	206.499	172.266	189.746	186.572	176.072	170.687	65.8734	75.6416	74.4434	0.927936	0.4	0.742218	0.392333	0.1	0.218592
Q9WTQ5	Akap12	AKA12	1292	single	R.CQETESNEEQSIS#PEK.R	2421.69	1629.1	2065.49	1555.59	1550.58	1418.32	870.141	717.062	759.028	0.750711	0.1	0.449082	0.367481	0.1	0.218592
Q9WTQ5	Akap12	AKA12	551	single	K.GES#S#ASSPEEPEEIACLEK.G	186.718	169.314	174.008	172.817	133.672	160.927	72.012	65.8362	71.7321	0.924824	0.2	0.571462	0.412233	0.1	0.218592
Q9WTQ5	Akap12	AKA12	910	single	R.SPSWISASMTEPLEHAEGVAT#PPVGEVTEK.D	410.698	506.807	445.78	440.036	330.986	417.179	221.441	160.477	235.067	0.935839	0.4	0.742218	0.496749	0.1	0.218592
Q9WTQ5	Akap12	AKA12	467	single	K.EVCVSGGDHTQLTDLS#PEEK.M	1225.93	1453.04	1593.97	1284.92	990.435	1095.37	726.652	756.069	588.901	0.753845	0.2	0.571462	0.500091	0.1	0.218592
Q9WTQ5	Akap12	AKA12	244	single	K.QAQSSTEIPLQAES#GQGTEEEAAK.D	1273.87	1201.89	1181.84	1279.51	1051.94	1042.75	566.782	706.074	674.854	0.875233	0.7	0.902214	0.561493	0.1	0.218592
Q9WTQ5	Akap12	AKA12	1351	single	K.ALGS#LEGSPSLPDQDK.A	383.972	325.228	380.478	283.589	283.446	237.032	206.121	201.912	211.575	0.744974	0.1	0.449082	0.541741	0.1	0.218592
Q9WTQ5	Akap12	AKA12	1191	single	K.QSQVTEEEAAAAQTEGPST#PSSFPAQEEHR.E	148.542	156.736	180.858	159.915	149.5	125.108	98.4574	108.77	74.7111	0.953832	0.7	0.902214	0.628173	0.1	0.218592
Q9WTQ5	Akap12	AKA12	555	single	K.GESSASS#PEEPEEIACLEK.G	152.942	137.833	148.395	119.069	97.7336	115.062	102.194	70.8374	82.2973	0.775379	0.1	0.449082	0.554582	0.1	0.218592
Q9WTQ5	Akap12	AKA12	584	single	K.GPSEAPQEAEAEEGATS#DGEK.K	3108.52	2326.98	2908.32	2345.21	1900.68	1942.14	1636.24	1668.93	1801.83	0.667788	0.2	0.571462	0.573848	0.1	0.218592
Q9WTQ5	Akap12	AKA12	350	single	K.TEPAPAEEQEPAEGTDQARLS#ADYEK.V	933.812	775.568	801.756	769.314	666.194	679.499	536.426	496.907	531.203	0.847514	0.1	0.449082	0.662549	0.1	0.218592
Q9WTQ5	Akap12	AKA12	344	single	K.TEPAPAEEQEPAEGT#DQAR.L	547.221	485.251	496.949	461.814	364.758	407.749	336.432	365.218	322.891	0.820505	0.1	0.449082	0.676995	0.1	0.218592
Q9WTQ5	Akap12	AKA12	1563	single	K.DESDLQVS#PQDGTLSAVAQEGLAVSDSSEGMSK.A	94.3219	89.7564	87.8408	80.6091	88.3253	81.0655	59.5979	65.6139	71.7686	0.903173	0.2	0.571462	0.731022	0.1	0.218592
Q9WTQ5	Akap12	AKA12	632	single	K.SATLSST#ESTASGM*QDEVR.A	619.572	547.319	686.878	433.111	383.299	405.564	521.014	527.428	581.552	0.654587	0.1	0.449082	0.851279	0.2	0.344665
Q9WTQ5	Akap12	AKA12	194	single	K.KDEGEGAEAS#VGAGDHQEPGVETVGESASK.E	282.366	395.885	340.293	390.686	274.938	257.147	159.376	172.99	189.808	0.807946	0.4	0.742218	0.508357	0.1	0.218592
Q9WTQ5	Akap12	AKA12	270	single	K.EPTKPLES#PTS#PVSNETTSSFK.K	1099.9	730.043	921.976	696.059	666.397	586.019	502.765	651.688	591.225	0.722793	0.1	0.449082	0.641259	0.1	0.218592
Q9WTQ5	Akap12	AKA12	543	single	K.RGGGGGDEEPGEYQHIQTESPES#ADEQK.G	241.132	329.051	352.671	517.887	353.776	202.534	622.936	959.504	571.073	1.07514	0.7	0.902214	1.89313	0.1	0.218592
Q9WTQ5	Akap12	AKA12	248	single	K.QAQSSTEIPLQAESGQGT#EEEAAK.D	157.371	115.636	161.124	121.442	112.187	102.843	99.9143	108.031	110.683	0.712884	0.2	0.571462	0.686475	0.1	0.218592
Q9WTQ5	Akap12	AKA12	767	single	R.AEDS#GAEQLASEIEPSR.E	32.0467	36.21	31.2095	40.024	30.8072	32.3586	19.8011	29.8419	22.746	1.00973	1	1	0.709776	0.1	0.218592
Q9WTQ5	Akap12	AKA12	786	single	R.AEDSGAEQLASEIEPSREESWVS#IK.K	49.0331	61.672	40.2044	68.3166	43.8506	45.3882	27.6547	37.9947	25.0242	0.925665	1	1	0.564001	0.1	0.218592
Q9WTQ5	Akap12	AKA12	489	single	K.HPEGIVSEVEM*LSS#QER.I	140.347	258.116	221.518	261.53	159.317	179.539	113.94	130.017	115.344	0.810493	1	1	0.520699	0.1	0.218592
Q9WTQ5	Akap12	AKA12	18	single	R.SPEQPAES#DTPSELELSGHGPAAEASGAAGDPADADPATK.L	78.9587	97.1421	109.924	89.4447	64.6223	65.5551	83.1253	78.9384	63.6825	0.674837	0.2	0.571462	0.812608	0.2	0.344665
Q9WTQ5	Akap12	AKA12	540	single	K.RGGGGGDEEPGEYQHIQTES#PESADEQK.G	114.306	159.295	162.348	133.429	88.8731	75.7374	144.162	95.8424	135.89	0.557917	0.2	0.571462	0.853071	0.4	0.557775
Q9WTQ5	Akap12	AKA12	727	single	K.EADALPASTQEQDQAHGSSS#PEPAGSPSEGEGVSTWESFK.R	40.6638	127.88	107.273	156.298	81.294	119.174	84.0069	81.9153	66.811	1.11094	0.7	0.902214	0.763617	0.7	0.80192
E9Q394	Akap13	E9Q394	1128	single	K.GVTDLQEVIT#PEIEPLDCK.R	116.107	104.486	88.0907	116.334	136.853	150.489	77.0601	77.5659	71.0842	1.30978	0.1	0.449082	0.737517	0.1	0.218592
E9Q394	Akap13	E9Q394	2692	single	K.SGS#LDSELSVS#PK.R	708.843	1081.64	948.734	1394.61	1017.14	815.338	1604.37	2330.86	2114.28	1.07211	0.7	0.902214	2.22852	0.1	0.218592
E9Q394	Akap13	E9Q394	487	single	K.AGELEHSLLT#PDATTQNNKPQVGEGTK.E	98.9676	94.1721	98.2923	181.509	138.209	128.321	217.307	242.396	234.892	1.4061	0.1	0.449082	2.38972	0.1	0.218592
E9Q394	Akap13	E9Q394	1077	single	R.SAMEDVTVADAS#PATAEPR.K	100.612	99.0236	110.794	90.5688	69.9719	74.2199	57.0934	82.98	71.9858	0.737685	0.1	0.449082	0.715479	0.1	0.218592
E9Q394	Akap13	E9Q394	1224	single	K.QVAQASIPAEESNATTVSTQAADVPTRADSIEETAT#R.I	96.8872	111.22	68.8221	55.1885	50.0053	58.442	58.0314	81.4655	57.7988	0.569617	0.1	0.449082	0.598958	0.2	0.344665
E9Q394	Akap13	E9Q394	1839	single	R.S#AVLLADEATAAPMFTNR.R	202.593	391.505	282.599	618.13	418.007	540.397	190.369	474.884	283.332	1.91224	0.1	0.449082	1.0026	1	1
E9Q394	Akap13	E9Q394	583	single	R.GCEGGTTSDQSS#PVLPAAAIENK.V	1293.25	1024.83	1276.83	1285.42	1477.8	1279.98	1416.87	1794.71	1304.69	1.00673	0.4	0.742218	1.10968	0.1	0.218592
E9Q394	Akap13	E9Q394	1569	single	R.SFS#LEGLTGGGVGNKPSSSLEMSSANSSELR.N	122.916	114.997	93.7621	128.984	125.415	110.976	81.764	108.149	115.495	1.0906	0.4	0.742218	0.940457	0.7	0.80192
E9Q394	Akap13	E9Q394	1908	single	K.VNESTES#LT#DEGVGTDMNEGQLMGDFESDSK.Q	54.9652	96.6066	87.7131	99.7129	80.4303	107.799	100.613	82.1127	133.572	1.13681	0.4	0.742218	1.14707	0.4	0.557775
E9Q394	Akap13	E9Q394	1253	single	K.VETQNPSLSS#PETK.Q	670.447	583.86	535.528	709.313	662.638	659.884	563.623	478.163	718.514	1.13493	0.4	0.742218	0.96534	1	1
E9Q394	Akap13	E9Q394	1218	single	R.ADS#IEETATR.I	923.506	606.758	921.727	921.961	1255.03	1054.11	739.302	1318.3	866.753	1.14362	0.2	0.571462	0.940358	1	1
E9Q394	Akap13	E9Q394	784	single	K.ELAPDQVSPPASSFSLASS#PESESVTK.D	259.415	246.599	151.774	143.858	167.786	175.037	151.367	312.192	183.445	0.6804	0.4	0.742218	0.743898	1	1
E9Q394	Akap13	E9Q394	2361	single	R.DMTECSTPLPEDCS#PTHS#PR.V	299.809	363.737	353.461	337.063	314.183	338.287	421.649	371.166	300.66	0.953607	0.7	0.902214	1.05009	0.4	0.557775
E9Q394	Akap13	E9Q394	1892	single	K.FLSHS#TDSLNK.I	96.1342	481.45	387.207	736.095	276.272	442.524	278.997	749.775	291.855	1.14286	0.7	0.902214	0.753745	1	1
E9Q394	Akap13	E9Q394	1613	single	R.NSLM*SLS#EEHLEPDQR.Q	173.256	255.074	248.354	303.671	211.244	182.394	164.105	237.489	210.36	0.850577	1	1	0.847019	0.4	0.557775
A2A3V1	Akap17b	AK17B	678	single	K.DIASETDEHLS#PTDGESYPVEK.I	106.818	131.42	158.837	107.127	72.4618	60.4539	120.293	97.3585	98.6762	0.551375	0.2	0.571462	0.750844	0.2	0.344665
O54931	Akap2	AKAP2	740	single	R.TLS#MIEEEIR.A	515.67	597.228	383.6	634.89	694.844	680.596	175.637	283.964	226.013	1.31983	0.1	0.449082	0.43829	0.1	0.218592
O54931	Akap2	AKAP2	799	single	K.VKPPPS#PTTEGPSLQPDLAPEEAAGTQRPK.N	798.252	690.306	903.177	744.674	639.193	644.491	507.192	636.785	575.236	0.807378	0.2	0.571462	0.72062	0.1	0.218592
Q9DBR0	Akap8	AKAP8	552	single	K.GEDPFVNETADLET#EGDENVGEEK.E	654.072	586.433	530.973	827.049	941.918	765.939	173.371	256.698	238.786	1.4103	0.1	0.449082	0.407184	0.1	0.218592
Q9DBR0	Akap8	AKAP8	634	single	K.LLEEQTCEAASETRS#IEDK.T	1117.55	902.871	1206.57	1041.22	861.582	950.743	723.682	717.062	603.761	0.85074	0.4	0.742218	0.641638	0.1	0.218592
Q9DBR0	Akap8	AKAP8	596	single	K.AVEGEGEPAAAHS#DVLTEVEGPVDTAEASSDPHTEK.L	150.915	216.46	230.734	231.941	174.976	158.431	195.497	161.179	183.992	0.808356	1	1	0.850008	0.7	0.80192
E9QQ10	Akap9	E9QQ10	1183	single	K.ENSGVYTSQNQS#PELQEYR.Y	137.809	150.956	182.845	169.318	138.402	127.12	205.167	195.499	210.673	0.916837	0.7	0.902214	1.35911	0.1	0.218592
E9QQ10	Akap9	E9QQ10	2791	single	R.EVYSSDS#ESDWGQSQGFDTAIEGR.E	79.2237	96.0286	104.617	79.2187	74.6463	67.2797	93.338	113.487	116.84	0.777334	0.1	0.449082	1.1818	0.4	0.557775
E9QQ10	Akap9	E9QQ10	1474	single	K.AVPLS#SHDDLDDILK.S	114.138	226.178	173.964	413.801	208.779	257.321	303.404	331.39	288.968	1.47916	0.2	0.571462	1.74406	0.1	0.218592
E9QQ10	Akap9	E9QQ10	2993	single	K.SS#QELLDCSMQQK.Q	164.059	236.546	264.035	224.288	173.871	187.837	337.527	280.612	213.835	0.794083	0.7	0.902214	1.18629	0.4	0.557775
E9QQ10	Akap9	E9QQ10	1289	single	R.QVQELQS#PVAAGQLQLTETEANHR.A	85.5278	135.5	122.975	153.565	109.344	141.129	117.902	108.39	130.057	1.14763	0.4	0.742218	0.958751	1	1
Q99LF1	Akirin1	AKIR1	22	single	K.RPMEFEAALLSPGS#PK.R	232.903	260.458	244.143	286.153	261.389	228.535	149.958	199.114	211.388	1.07064	0.7	0.902214	0.815566	0.1	0.218592
B1AXD8	Akirin2	AKIR2	21	single	K.RTLDFDPLLSPAS#PK.R	440.498	503.218	463.163	596.375	518.379	573.502	225.447	285.913	337.731	1.23823	0.1	0.449082	0.617304	0.1	0.218592
B1AXD8	Akirin2	AKIR2	55	single	R.CAPLSAPASAAASPAAATAAAAASAAAAS#PQK.Y	29.7643	40.2765	32.9505	40.2591	26.7448	50.1986	23.7782	32.8858	18.1003	1.2218	1	1	0.721634	0.2	0.344665
Q80VW7	Akna	AKNA	51	single	R.DQGWGNSQSLPEAPS#PELLEDFRR.A	108.406	102.538	107.936	114.811	95.046	85.3876	56.7098	51.82	54.8535	0.880577	0.7	0.902214	0.508204	0.1	0.218592
Q80VW7	Akna	AKNA	520	single	R.TDLS#PSSSPGVATPGR.L	219.823	258.137	239.295	259.517	175.004	176.02	173.704	164.048	212.247	0.735579	0.7	0.902214	0.725901	0.1	0.218592
Q80VW7	Akna	AKNA	1016	single	R.TS#PDSAPAPTAASTPHGSAESTANLLLNR.T	64.9826	65.5191	56.3807	69.1413	59.7296	70.5901	49.1301	64.7706	55.9672	1.064	0.4	0.742218	0.861264	0.2	0.344665
Q9JII6	Akr1a1	AK1A1	211	single	R.GLEVTAYS#PLGSSDR.A	156.916	156.714	123.541	126.333	145.176	134.512	135.265	99.9801	186.285	0.858327	0.7	0.902214	0.863134	1	1
P45377	Akr1b8	ALD2	215	single	K.GISVTAYSPLGS#PDRPSAKPEDPSLLEDPK.I	175.859	165.129	234.118	186.947	238.646	206.719	345.504	187.898	377.563	1.17548	0.4	0.742218	1.96466	0.2	0.344665
Q9D1F4	Akt1s1	AKTS1	248	single	R.LNTS#DFQK.L	699.149	554.814	172.752	688.12	1306.64	820.14	41.4439	50.6	66.0544	1.47822	0.2	0.571462	0.091202	0.1	0.218592
Q9D1F4	Akt1s1	AKTS1	204	single	K.RTEARS#S#DEENGPPS#SPDLDR.I	769.66	779.265	992.482	918.189	781.566	662.004	971.983	1351.43	1060.52	1.00295	1	1	1.36093	0.2	0.344665
Q9D1F4	Akt1s1	AKTS1	203	single	K.RTEARS#S#DEENGPPS#SPDLDR.I	73.9859	67.0208	98.9171	84.2847	65.231	61.0433	82.7116	113.816	86.944	0.881668	0.4	0.742218	1.17514	0.4	0.557775
Q9D1F4	Akt1s1	AKTS1	213	single	K.RTEARSS#DEENGPPS#S#PDLDR.I	68.3373	49.977	75.9307	74.5338	62.9101	50.8675	51.0099	61.5643	67.243	0.920582	1	1	0.900888	0.7	0.80192
Q9WUA6	Akt3	AKT3	447	single	R.YFDEEFTAQTITIT#PPEK.Y	54.3308	73.8005	57.4537	51.7263	52.5967	52.1295	57.981	42.9865	61.3156	0.90733	0.1	0.449082	1.00918	1	1
P10518	Alad	HEM2	215	single	R.DAAQSS#PAFGDR.R	355.515	348.875	371.943	473.94	290	259.537	465.148	539.659	450.781	0.815717	0.7	0.902214	1.30838	0.1	0.218592
Q8R0Y6	Aldh1l1	AL1L1	671	single	K.KVS#LELGGK.S	1688.59	1906.94	2982.63	1865.94	1516.82	1744.53	1562.32	2520.24	1773.15	0.914831	0.4	0.742218	0.929841	0.7	0.80192
P47738	Aldh2	ALDH2	356	single	R.VVGNPFDS#RTEQGPQVDETQFK.K	179.728	212.959	214.356	231.008	284.93	212.916	512.308	624.019	557.357	1.08475	0.4	0.742218	2.6172	0.1	0.218592
P05064	Aldoa	ALDOA	46	single	R.LQS#IGTENTEENR.R	450.787	371.491	367.717	441.194	608.886	449.583	205.87	338.522	244.506	1.21022	0.4	0.742218	0.658176	0.1	0.218592
P05064	Aldoa	ALDOA	132	single	K.GVVPLAGTNGETTTQGLDGLS#ER.C	78.0757	78.2141	51.2373	79.7778	74.0103	73.8747	42.8685	47.6445	59.9194	0.947929	1	1	0.610235	0.2	0.344665
P05064	Aldoa	ALDOA	36	single	K.GILAADES#TGSIAK.R	2602.81	2125.74	2841.57	1973.79	2032.28	1577.91	1750.06	2705.44	2370.1	0.75833	0.1	0.449082	0.91059	0.7	0.80192
P05063	Aldoc	ALDOC	39	single	K.GILAADESVGS#MAK.R	142.756	123.994	121.639	142.625	129.557	107.493	83.384	122.341	88.1201	1.04486	1	1	0.710677	0.2	0.344665
Q3TSG4	Alkbh5	ALKB5	372	single	K.S#YESSEDCPEAASSPTRK.V	154.979	148.561	174.783	283.131	264.367	296.415	140.714	224.8	134.247	1.82689	0.1	0.449082	0.907951	0.7	0.80192
Q3TSG4	Alkbh5	ALKB5	65	single	K.YQEDS#DPERS#DYEEHQLQK.E	799.48	892.349	1257.13	1027.06	855.411	725.908	1599.33	3058.44	1863.85	0.958605	0.7	0.902214	2.0887	0.1	0.218592
Q3TSG4	Alkbh5	ALKB5	385	single	K.SYESSEDCPEAASS#PTRK.V	1138.51	953.69	1244.9	1239.54	1201.36	1404.94	734.002	1100.44	633.563	1.08873	0.4	0.742218	0.644703	0.2	0.344665
Q9CXB8	Alpk1	ALPK1	952	single	R.SSFASLAGQTS#QEILEAR.T	96.6729	123.763	95.0704	98.2982	98.9843	105.889	67.3906	84.8878	78.7155	1.02391	0.7	0.902214	0.814245	0.1	0.218592
Q920R0	Als2	ALS2	1329	single	K.DS#PEILSR.S	100.403	124.659	158.029	99.1149	76.0692	84.7714	140.394	162.514	128.416	0.680027	0.1	0.449082	1.12622	0.4	0.557775
O08583	Alyref	THOC4	237	single	K.QQLS#AEELDAQLDAYNAR.M	169.881	210.748	202.017	229.352	271.233	274.053	172.275	170.272	191.042	1.34262	0.1	0.449082	0.852774	0.7	0.80192
Q7TS75	Amer1	AMER1	239	single	K.MS#PAQVHFSPTTEK.A	170.59	211.889	214.714	243.8	158.919	210.139	120.389	115.349	133.45	0.991743	1	1	0.56817	0.1	0.218592
Q9D4H4	Amotl1	AMOL1	820	single	R.QTS#LTSSQLTEEK.K	412.422	442.88	382.795	442.182	628.628	405.014	221.417	299.845	269.474	1.07216	0.7	0.902214	0.653394	0.1	0.218592
Q9DBT5	Ampd2	AMPD2	111	single	K.TDSDS#DLQLYK.E	231.688	241.366	265.005	277.787	252.708	249.363	201.341	250.767	227.45	1.04699	0.4	0.742218	0.942343	0.4	0.557775
Q9DBT5	Ampd2	AMPD2	109	single	K.TDS#DSDLQLYK.E	1527.7	1445.8	1726.33	1637.34	1421.33	1959.76	1241.65	2004.44	1473	1.07177	1	1	0.964191	1	1
O08739	Ampd3	AMPD3	83	single	R.S#QSLSLQMPTQQDWK.G	117.915	191.682	58.1293	368.453	495.917	442.592	18.3844	71.4977	44.5059	3.75347	0.1	0.449082	0.37744	0.2	0.344665
Q7TQF7	Amph	AMPH	500	single	K.AALPAGEGGS#PEGAK.I	1206.96	563.273	814.08	952.089	878.128	559.1	99.2772	546.816	136.237	1.07868	1	1	0.167351	0.1	0.218592
P53995	Anapc1	APC1	688	single	R.SFDFEGSLS#PVIAPK.K	549.52	732.849	746.644	587.75	555.057	704.568	1008.36	901.348	1058.13	0.802008	0.7	0.902214	1.37594	0.1	0.218592
P53995	Anapc1	APC1	355	single	R.AHS#PALGVHSFSGAQR.F	48.8902	130.352	111.551	138.999	80.1537	92.4664	91.4553	131.452	89.3205	0.828914	1	1	0.81985	1	1
Q8BZQ7	Anapc2	ANC2	747	single	R.DNMVLIDS#DDESDSGMASQADQK.E	18.438	25.7775	30.8798	29.6328	32.2155	27.1345	77.055	62.9588	57.5984	1.14956	0.4	0.742218	2.44239	0.1	0.218592
Q8BZQ7	Anapc2	ANC2	489	single	K.TDPACLETGQDSEDDS#GEPEDWVPDPVDADPVK.S	83.7847	107.659	128.748	76.029	74.2473	91.7414	85.4494	54.9052	79.1212	0.706201	0.2	0.571462	0.734923	0.2	0.344665
Q8BZQ7	Anapc2	ANC2	549	single	R.LLHQFSFS#PER.E	69.6021	148.324	126.592	81.575	98.0079	123.839	149.181	184.071	125.25	0.774203	0.7	0.902214	1.17844	0.4	0.557775
Q8BZQ7	Anapc2	ANC2	329	single	K.VFLQDNPTRPTS#PEAGNTLR.R	118.728	180.51	158.536	164.882	127.944	231.423	223.177	191.532	206.885	1.04003	0.7	0.902214	1.30497	0.1	0.218592
Q91W96	Anapc4	APC4	777	single	K.EEVLS#ES#ETEAHQDAAALDPDVVIK.V	55.9224	88.3686	115.561	87.556	78.9436	82.7616	142.581	166.533	115.292	0.93655	0.7	0.902214	1.61348	0.2	0.344665
Q02357	Ank1	ANK1	813	single	R.M*SYPETVDEILDVS#EDEGDELVGSK.A	41.6745	39.9427	41.9414	30.053	28.8298	30.1857	32.1678	17.0927	39.5731	0.721137	0.1	0.449082	0.771882	0.1	0.218592
Q8C8R3	Ank2	ANK2	31	single	K.SDS#NASFLR.A	1070.71	830.548	1496.23	664.422	466.836	486.222	768.932	1061.48	969.918	0.454113	0.1	0.449082	0.905866	0.4	0.557775
Q8C8R3-2	Ank2	ANK2	3390	single	K.ARS#YIETETESR.E	732.582	576.679	617.691	476.997	490.078	470.761	178.647	170.772	250.368	0.772226	0.1	0.449082	0.289218	0.1	0.218592
Q8C8R3-2	Ank2	ANK2	2692	single	R.VQPPSPLPSSIDSNSS#PEEATQFQPIVPK.Q	317.112	204.848	227.291	159.022	184.21	176.507	93.9192	65.42	94.273	0.776569	0.1	0.449082	0.413212	0.1	0.218592
Q8C8R3-2	Ank2	ANK2	3254	single	R.SVYSGQDDES#PES#S#PEEQK.S	132.171	105.541	150.176	78.7419	114.128	124.046	51.6329	39.0959	47.5392	0.863486	0.4	0.742218	0.35968	0.1	0.218592
Q8C8R3-2	Ank2	ANK2	3078	single	R.TPTEEGT#PTSEQNPFLFQEGK.L	723.897	685.034	771.844	462.325	658.278	436.986	312.25	358.637	339.534	0.638662	0.1	0.449082	0.469037	0.1	0.218592
Q8C8R3-2	Ank2	ANK2	3720	single	K.TEGDS#PAAALS#PQMHQEPVQQDFSGK.T	479.083	435.288	417.753	424.455	351.502	363.95	206.235	261.085	196.244	0.836114	0.2	0.571462	0.47379	0.1	0.218592
Q8C8R3-2	Ank2	ANK2	2359	single	K.TQSESETQES#LTPSEVTKPFPPSDASVK.T	53.2597	36.3315	37.2906	41.5227	39.4103	41.8027	19.6779	21.7153	22.4431	1.11349	0.7	0.902214	0.582326	0.1	0.218592
Q8C8R3-2	Ank2	ANK2	3746	single	K.TQDQQEYYVTT#PGAEVEDPQK.A	128.846	100.53	105.983	90.6394	94.8561	84.2415	53.944	61.6671	61.3971	0.855223	0.1	0.449082	0.579308	0.1	0.218592
Q8C8R3-2	Ank2	ANK2	2648	single	R.KVS#SSSSESEPELTQLSK.G	581.72	388.9	467.003	361.96	363.252	401.689	242.11	249.733	276.024	0.777837	0.2	0.571462	0.534757	0.1	0.218592
Q8C8R3-2	Ank2	ANK2	2846	single	R.CAIPEGNES#AK.E	465.523	335.281	349.642	385.837	345.727	307.97	207.562	205.523	210.274	0.988805	0.7	0.902214	0.593641	0.1	0.218592
Q8C8R3-2	Ank2	ANK2	2392	single	R.S#PQGLELPLPNR.D	65.2708	54.7593	65.9877	45.8311	27.1589	35.5013	34.7424	30.7573	36.6831	0.543909	0.1	0.449082	0.532281	0.1	0.218592
Q8C8R3-2	Ank2	ANK2	2118	single	K.IVDEQGDMDFQIS#PDRK.T	1646.47	1495.84	1379.11	1267.7	1110.47	1046.92	888.225	774.825	887.259	0.74237	0.1	0.449082	0.59315	0.1	0.218592
Q8C8R3-2	Ank2	ANK2	3029	single	K.TDADADS#WSEIREDDAAFEAR.V	285.703	265.503	246.329	249.168	218.979	175.491	141.914	170.721	156.051	0.82477	0.2	0.571462	0.587754	0.1	0.218592
Q8C8R3-2	Ank2	ANK2	1749	single	K.AT#SPLIEETPIGSIK.D	1468.95	1285.93	1218.73	1040.48	1060.84	1058.12	745.389	861.811	803.583	0.822842	0.1	0.449082	0.624905	0.1	0.218592
Q8C8R3-2	Ank2	ANK2	2951	single	R.S#SPEDVVVTNSSNR.T	73.8808	69.2894	69.2529	54.9674	57.7964	48.1433	43.124	42.4108	43.7085	0.793301	0.1	0.449082	0.622374	0.1	0.218592
Q8C8R3-2	Ank2	ANK2	2455	single	K.ESPCRDS#LESSPVEPK.M	292.835	212.094	232.032	197.112	173.154	183.472	169.806	152.658	144.788	0.790719	0.1	0.449082	0.657918	0.1	0.218592
Q8C8R3-2	Ank2	ANK2	1727	single	K.KGS#S#EES#VDEDRGLVPEPLPTAK.A	289.678	220.354	283.739	187.058	118.906	155.147	177.041	163.075	220.391	0.546795	0.1	0.449082	0.623957	0.2	0.344665
Q8C8R3-2	Ank2	ANK2	2783	single	R.ETTQPETCDGHGCETVSPSNSATPVSLGVQS#PEHK.D	106.013	209.045	177.719	176.776	108.294	95.8481	50.5215	28.6525	24.5935	0.609354	0.4	0.742218	0.161224	0.1	0.218592
Q8C8R3-2	Ank2	ANK2	3773	single	K.TPEDIST#PPEGTKPCLQTPVTSER.G	103.904	80.3632	76.7327	73.0145	66.9654	79.708	58.9191	54.0769	37.6883	0.908556	0.2	0.571462	0.672905	0.1	0.218592
Q8C8R3-2	Ank2	ANK2	3813	single	R.KT#SLVIVESTDDQSQVFER.L	587.598	469.658	604.158	457.509	409.161	437.409	338.439	435.508	384.473	0.744401	0.1	0.449082	0.654313	0.1	0.218592
Q8C8R3-2	Ank2	ANK2	2570	single	K.RFT#PEEEMFK.M	2747.35	1875.77	1744.24	1515.93	1539.86	1455.58	1137.72	1178.14	1159.79	0.808161	0.1	0.449082	0.6183	0.1	0.218592
Q8C8R3-2	Ank2	ANK2	3792	single	R.GS#PIVQEPEEASEPK.E	1153.92	784.016	1278	671.655	617.108	551.996	778.523	843.084	742.706	0.534791	0.1	0.449082	0.674675	0.2	0.344665
Q8C8R3-2	Ank2	ANK2	2087	single	R.TPIIKT#PEVVPSVAAEESHR.G	118.584	172.224	104.486	136.452	115.163	160.262	74.943	62.7077	78.9266	1.15068	1	1	0.631984	0.1	0.218592
Q8C8R3-2	Ank2	ANK2	2230	single	K.HEGLAET#PETSPESLSFS#PK.K	250.476	239.34	209.511	229.698	206.171	192.77	193.204	182.536	179.398	0.861413	0.2	0.571462	0.762664	0.1	0.218592
Q8C8R3-2	Ank2	ANK2	842	single	K.LNVPETM*TEVLDVS#DEEGDDTVTGDGGEYLRPEDLK.E	25.9757	25.3744	29.1331	22.7168	17.4561	21.4995	25.8122	28.5173	34.7121	0.827675	0.1	0.449082	1.09784	0.7	0.80192
Q8C8R3-2	Ank2	ANK2	2361	single	K.TQSESETQESLT#PSEVTKPFPPSDASVK.T	383.939	276.898	241.538	307.222	264.931	289.028	181.359	196.754	175.31	1.04381	1	1	0.654968	0.1	0.218592
Q8C8R3-2	Ank2	ANK2	27	single	R.QSDS#NAS#FLR.A	877.882	728.757	1365.04	512.556	395.216	386.341	723.89	901.159	828.752	0.450193	0.1	0.449082	0.944036	0.7	0.80192
Q8C8R3-2	Ank2	ANK2	1454	single	K.ES#ES#DQEPEEEIGMTSEK.N	260.003	302.154	308.497	266.39	200.283	222.202	275.499	308.465	320.074	0.735394	0.2	0.571462	1.02089	0.7	0.80192
Q8C8R3-2	Ank2	ANK2	2855	single	K.EIASPSS#PVK.V	2744.26	1317.1	1941.39	1189.28	1436.02	1343.94	820.364	1034.15	847.342	0.692257	0.4	0.742218	0.436463	0.1	0.218592
Q8C8R3-2	Ank2	ANK2	1476	single	K.NDETES#TETSVLK.S	1543.75	1340.19	1543.77	1387.36	932.559	1107.94	743.435	1240.97	897.119	0.717692	0.2	0.571462	0.581128	0.1	0.218592
Q8C8R3-2	Ank2	ANK2	1456	single	K.ES#ES#DQEPEEEIGMTSEK.N	312.74	278.316	350.617	272.568	223.979	235.306	236.595	292.484	262.383	0.752403	0.1	0.449082	0.838981	0.2	0.344665
Q8C8R3-2	Ank2	ANK2	3714	single	K.TEGDS#PAAALS#PQMHQEPVQQDFSGK.T	184.269	313.186	280.491	269.331	173.318	216.275	146.145	165.046	117.941	0.771058	0.4	0.742218	0.521033	0.1	0.218592
Q8C8R3-2	Ank2	ANK2	2241	single	K.HEGLAETPETSPESLSFS#PK.K	365.725	310.459	376.756	303.867	250.54	235.074	275.161	347.065	279.11	0.68505	0.1	0.449082	0.763167	0.2	0.344665
Q8C8R3-2	Ank2	ANK2	2503	single	R.LLRDPDGS#AEDDSLEQTSLM*ESSGK.S	196.893	157.56	184.39	160.047	137.182	132.429	140.462	165.641	150.604	0.743978	0.2	0.571462	0.816766	0.2	0.344665
Q8C8R3-2	Ank2	ANK2	2611	single	R.QDGSSSAS#DPDADYSAEVNDEK.Q	139.974	120.075	187.361	77.1042	116.04	92.4059	104.287	29.1365	94.0075	0.660167	0.1	0.449082	0.671609	0.1	0.218592
Q8C8R3-2	Ank2	ANK2	849	single	K.LNVPETM*TEVLDVSDEEGDDT#VTGDGGEYLRPEDLK.E	64.8077	71.4477	71.8044	72.2488	72.0526	66.9313	71.9573	83.4271	78.5255	1.00847	0.4	0.742218	1.09906	0.1	0.218592
Q8C8R3-2	Ank2	ANK2	2124	single	K.TS#TDFSEVIK.Q	638.576	404.562	537.185	347.626	376.28	514.699	269.001	420.835	318.952	0.700466	0.2	0.571462	0.593747	0.2	0.344665
Q8C8R3-2	Ank2	ANK2	2427	single	K.DSLEAS#PVLEDNSSHK.T	711.029	764.843	929.306	708.765	539.988	622.779	620.561	760.894	575.762	0.814258	0.1	0.449082	0.811356	0.2	0.344665
Q8C8R3-2	Ank2	ANK2	1928	single	K.HLPGS#PSIR.T	294.597	411.19	434.585	286.643	334.786	340.208	322.471	114.413	274.198	0.814187	0.4	0.742218	0.666841	0.2	0.344665
Q8C8R3-2	Ank2	ANK2	2208	single	K.QEVIAGSPCSS#LMEGTPQISSEESYK.H	187.191	195.377	237.237	143.387	194.536	146.301	200.748	37.8223	114.01	0.748816	0.2	0.571462	0.583542	0.4	0.557775
Q8C8R3-2	Ank2	ANK2	3371	single	K.S#ESDASSLDAK.T	4722.48	1249.19	1125.99	3101.19	1999.43	1821.09	718.747	429.201	754.553	1.60058	0.7	0.902214	0.575369	0.1	0.218592
Q8C8R3-2	Ank2	ANK2	1964	single	K.QPPIS#PTSK.T	1862.65	635.694	975.052	1027.6	1006.15	1052.95	544.183	829.258	630.801	1.05389	0.7	0.902214	0.646941	0.2	0.344665
Q8C8R3-2	Ank2	ANK2	1590	single	R.ELEEEWVIVS#DEEIQEAK.Q	55.9739	43.7085	62.9471	53.5513	45.055	41.1251	39.1336	54.6584	51.9996	0.804928	0.4	0.742218	0.928996	0.4	0.557775
G5E8K5	Ank3	ANK3	1803	single	R.RLT#GGLLDR.L	439.994	492.515	394.168	525.778	456.747	704.212	190.41	178.673	188.616	1.19497	0.2	0.571462	0.428678	0.1	0.218592
G5E8K5	Ank3	ANK3	606	single	K.VALLLLDQGAS#PHAAAK.N	53.9635	52.1442	48.5614	35.3665	30.1532	32.5788	30.3403	27.9919	31.4301	0.624783	0.1	0.449082	0.581854	0.1	0.218592
G5E8K5	Ank3	ANK3	830	single	K.MNVPETMNEVLDMS#DDEVRK.A	335.106	332.789	364.715	233.444	164.185	198.094	212.51	166.672	238.182	0.591139	0.1	0.449082	0.634158	0.1	0.218592
G5E8K5	Ank3	ANK3	1795	single	R.AELAMSSLAGWQNETPSGSLES#PAQAR.R	95.2282	149.125	107.59	159.469	121.415	124.356	89.538	96.1691	103.361	1.15583	0.4	0.742218	0.893845	0.4	0.557775
G5E8K5	Ank3	ANK3	1883	single	R.TEEPVS#PLTAYQK.S	401.981	399.473	436.574	453.497	454.738	575.602	454.342	416.249	466.802	1.13124	0.1	0.449082	1.13026	0.2	0.344665
G5E8K5	Ank3	ANK3	1470	single	R.YSYLTEPSMS#PQSPCER.T	15.8478	36.0098	36.5773	41.5931	31.8798	38.7116	32.9368	32.4297	31.8049	1.07503	0.4	0.742218	0.900578	0.7	0.80192
G5E8K5-2	Ank3	ANK3	830	single	K.MNVPETM*NEVLDMS#DDEGEDAITGDTDK.Y	57.8815	79.4942	91.0153	55.099	52.8605	52.2637	60.9635	54.2274	56.6896	0.664961	0.1	0.449082	0.71313	0.2	0.344665
G5E8K5-2	Ank3	ANK3	1560	single	R.SFADENNVFHDPVDGWQNETPSGSLES#PAQAR.R	41.2807	65.5349	63.7049	55.3141	48.1893	52.1843	51.2588	29.9774	47.1425	0.819156	0.7	0.902214	0.740013	0.4	0.557775
G5E8K2	Ank3	G5E8K2	830	single	K.MNVPETMNEVLDMS#DDEGDK.C	297.67	396.951	510.754	321.003	287.043	319.104	392.169	361.24	432.8	0.803888	0.4	0.742218	0.987952	1	1
G5E8K3	Ank3	G5E8K3	850	single	K.ASAPEKLS#DGEYIS#DGEEGEDAITGDTDK.Y	205.883	225.943	290.907	362.807	270.183	195.782	756.031	118.949	138.025	1.19581	1	1	0.610884	0.7	0.80192
E9PUR0	Ankhd1	E9PUR0	1557	single	K.TKESPPT#AHLILPEPHISLAQQK.A	153.989	185.972	195.256	204.074	184.614	204.19	128.662	72.9876	131.245	1.09734	0.4	0.742218	0.691832	0.1	0.218592
E9PUR0	Ankhd1	E9PUR0	1671	single	K.SLPLSSPT#MK.L	605.954	683.004	614.282	865.604	750.167	887.818	618.438	702.251	731.71	1.40913	0.1	0.449082	1.14321	0.2	0.344665
E9PUR0	Ankhd1	E9PUR0	1592	single	R.GGGAGGNS#DS#DNIDSTDCNSESSSGGK.S	136.12	93.1867	130.621	156.737	120.243	136.22	104.548	67.1092	65.3629	1.04286	0.4	0.742218	0.513769	0.2	0.344665
E9PUR0	Ankhd1	E9PUR0	806	single	K.S#LELIQGEPLNK.D	117.989	121.429	150.857	185.321	146.431	124.713	121.69	192.466	162.675	1.2059	0.4	0.742218	1.33967	0.2	0.344665
E9PUR0	Ankhd1	E9PUR0	1612	single	K.S#QEFSFPVDVNPASDK.R	123.415	115.085	155.154	141.393	133.054	113.38	120.12	102.565	126.207	1.0781	1	1	0.973299	0.7	0.80192
Q6ZPS6	Ankib1	AKIB1	886	single	R.DFLSNETSLGAIGSS#LPSR.L	30.8391	39.9788	21.661	46.9783	49.7184	48.0596	10.799	13.3098	15.1397	1.5584	0.1	0.449082	0.431589	0.1	0.218592
Q6ZPS6	Ankib1	AKIB1	738	single	R.GVAPADS#PDAPRR.S	1884.05	1094.21	1512.45	2264.12	1863.27	2768.6	2199.85	2781.88	1908.68	1.49699	0.2	0.571462	1.45449	0.1	0.218592
Q6P1H6	Ankle2	ANKL2	789	single	K.GAADSDLLAS#PPAIASLGK.K	281.491	288.984	272.238	325.779	254.922	291.63	131.809	99.715	168.235	1.03602	0.7	0.902214	0.468255	0.1	0.218592
Q6P1H6	Ankle2	ANKL2	820	single	K.S#PQLGVQAGLEPILSSATVDSTK.R	21.8196	30.3814	32.9936	37.7757	24.1801	39.4708	44.5415	56.3819	50.067	1.24338	0.4	0.742218	1.64795	0.1	0.218592
Q99LW0	Ankrd10	ANR10	232	single	R.VPS#LDHAMPLANGEAEDDADR.M	368.28	343.126	343.757	466.281	431.58	421.962	165.025	254.454	208.193	1.25548	0.1	0.449082	0.605638	0.1	0.218592
E9Q4F7	Ankrd11	E9Q4F7	1808	single	R.QQSVPAPSSFDS#PVQHLLEEK.A	468.845	622	554.475	517.884	616.211	724.319	188.878	45.5173	344.587	1.11134	0.7	0.902214	0.340643	0.1	0.218592
E9Q4F7	Ankrd11	E9Q4F7	838	single	K.FSLS#DDQQER.W	330.001	352.99	357.094	304.423	295.259	299.606	416.264	572.795	448.861	0.848766	0.1	0.449082	1.2716	0.1	0.218592
E9Q4F7	Ankrd11	E9Q4F7	2139	single	K.DAS#DVEAEAAK.A	1537.24	436.553	28.0933	589.575	870.19	441.015	1163.37	1578.01	2252.99	1.35052	0.7	0.902214	3.61471	0.2	0.344665
E9Q4F7	Ankrd11	E9Q4F7	1837	single	K.FACLSPGYYS#PDYGIPSPK.V	195.713	161.984	166.917	116.851	99.5468	102.857	183.815	40.9896	123.162	0.616218	0.1	0.449082	0.737865	0.4	0.557775
E9Q4F7	Ankrd11	E9Q4F7	73	single	K.LPFTVGANGEQKDS#DTEK.Q	396.812	508.095	535.122	665.338	714.887	857.788	338.21	981.739	446.701	1.40699	0.1	0.449082	0.879169	1	1
E9Q4F7	Ankrd11	E9Q4F7	1783	single	R.RT#PEEEFSAGDK.L	561.746	605.197	567.103	661.656	551.821	551.455	556.572	629.239	670.913	0.973053	0.7	0.902214	1.10957	0.7	0.80192
G5E893	Ankrd12	G5E893	1778	single	R.VPQPVQVS#PSLLQAK.E	155.366	155.478	157.207	147.422	144.656	145.064	121.447	62.6156	113.435	0.933021	0.1	0.449082	0.729592	0.1	0.218592
G5E893	Ankrd12	G5E893	561	single	K.ACIS#PGSSEMSLQPDLTR.Y	72.9953	80.4439	90.0946	68.0133	75.0344	77.2187	68.7069	59.3844	56.1463	0.932754	0.4	0.742218	0.738209	0.1	0.218592
G5E893	Ankrd12	G5E893	152	single	R.DNSPDS#TPSHPSQATPAQK.K	70.8197	19.9003	44.8774	137.824	44.6544	104.582	49.9332	51.967	26.9053	2.33038	0.4	0.742218	1.11266	1	1
G5E893	Ankrd12	G5E893	1349	single	R.GLSHVSDLHPNCT#GSPTR.S	116.452	146.187	173.696	197.671	132.79	144.587	134.963	137.239	134.228	0.989058	1	1	0.923219	0.7	0.80192
Q99NH0	Ankrd17	ANR17	41	single	K.ATVPAAAEGEGSPPAAAAVAAPPAAAAAEVGGGARPAS#SPR.G	45.9815	49.5188	41.8665	51.1279	48.2685	43.4022	40.3389	36.0974	33.6016	1.04974	0.7	0.902214	0.785041	0.1	0.218592
Q99NH0	Ankrd17	ANR17	2041	single	K.EHYPVSSPSS#PSPPAQPGGVSR.N	18.524	26.4298	36.4868	34.9149	38.0203	48.9706	20.3707	21.7727	20.7859	1.43854	0.2	0.571462	0.786455	0.7	0.80192
Q99NH0	Ankrd17	ANR17	1636	single	K.SNNHAS#AVVTTTMASK.K	32.9659	42.4583	41.6177	47.5057	42.4188	58.5897	26.7479	40.2933	27.974	1.14148	0.2	0.571462	0.672167	0.2	0.344665
Q99NH0	Ankrd17	ANR17	2063	single	R.NS#PLDCGSAS#PNK.G	3680.35	2309.65	4063.24	2452.48	3655.15	2836.42	1986.27	1749.43	1990.16	0.770693	0.7	0.902214	0.539695	0.1	0.218592
Q99NH0	Ankrd17	ANR17	1692	single	K.SGPS#PLSSPNGK.L	123.918	116.436	138.578	161.757	149.082	150.999	114.522	137.499	158.18	1.21854	0.1	0.449082	1.1096	1	1
Q99NH0	Ankrd17	ANR17	2055	single	R.NS#PLDCGSAS#PNK.G	515.52	252.328	360.721	422.026	512.425	429.246	329.444	355.191	295.312	1.18996	0.7	0.902214	0.913292	0.7	0.80192
Q99NH0	Ankrd17	ANR17	1695	single	K.SGPSPLS#S#PNGK.L	261.522	287.831	333.878	378.044	290.14	316.484	277.124	306.686	383.402	1.09955	0.4	0.742218	1.06551	0.7	0.80192
B2RW11	Ankrd34a	B2RW11	391	single	R.QSQESLPGAVS#PLSGR.R	309.894	331.92	285.548	250.333	223.434	210.903	135.45	103.345	161.242	0.721003	0.1	0.449082	0.437086	0.1	0.218592
B2RW11	Ankrd34a	B2RW11	315	single	R.RNT#APEAQESGLPSGLR.Q	110.507	130.83	99.3959	108.64	135.007	103.647	87.4847	90.7695	109.225	0.983103	1	1	0.82139	0.2	0.344665
Q8VE42	Ankrd49	ANR49	48	single	K.THGHLIPTGTQSLWVGNS#DEDEEQEEK.N	106.958	254.502	231.022	196.249	121.601	116.312	98.9956	111.89	150.176	0.52636	0.7	0.902214	0.484324	0.4	0.557775
F7BE84	Ankrd50	F7BE84	1100	single	R.SNS#S#GGTGGGDLQPSLR.G	186.278	229.294	192.469	257.465	147.155	183.311	280.473	158.522	274.199	0.952417	0.7	0.902214	1.42464	0.7	0.80192
F7BE84	Ankrd50	F7BE84	1130	single	R.GLPNGPAHAFSSPS#ES#PDSTVDR.Q	46.531	97.3418	106.868	126.602	65.4583	79.6042	81.8543	82.1517	67.2132	0.817781	1	1	0.840896	0.7	0.80192
P59672	Anks1a	ANS1A	663	single	R.SES#LSNCS#IGK.K	1782.06	1451.21	1555	1978.82	1331.1	1627.71	601.818	555.845	566.513	1.04676	1	1	0.364317	0.1	0.218592
P59672	Anks1a	ANS1A	693	single	K.IMSS#IGEGIDFSQEQQK.I	237.893	293.161	207.627	360.617	232.887	254.53	103.211	101.266	132.526	1.06994	0.7	0.902214	0.433856	0.1	0.218592
P59672	Anks1a	ANS1A	679	single	K.SPS#FASEWDEIEK.I	2702.95	2804.3	3028.16	2924.05	2149.2	2135.66	1865.81	2176.3	2326.07	0.766395	0.4	0.742218	0.776059	0.1	0.218592
P59672	Anks1a	ANS1A	642	single	K.S#DSDLLTCSPTEDATMGSR.S	389.487	394.136	465.95	491.195	327.439	326.254	321.285	221.757	255.502	0.830776	0.7	0.902214	0.648257	0.1	0.218592
P59672	Anks1a	ANS1A	644	single	R.SLSKSDS#DLLTCSPTEDATMGSR.S	310.44	212.849	242.026	225.224	138.353	224.525	218.83	126.483	150.609	0.927689	0.4	0.742218	0.622287	0.2	0.344665
P59672	Anks1a	ANS1A	668	single	R.S#ESLSNCS#IGK.K	473.604	503.887	719.932	517.679	314.199	369.217	537.685	429.142	421.061	0.732738	0.4	0.742218	0.851664	0.4	0.557775
Q9CZK6	Anks3	ANKS3	225	single	K.IVALMETHS#PVLPK.S	215.68	285.401	232.559	263.319	175.718	205.474	309.509	229.887	286.663	0.883536	0.4	0.742218	1.23265	0.4	0.557775
Q9CZK6	Anks3	ANKS3	373	single	R.AQGLSSEASIES#NEDS#DHARK.S	152.701	243.171	221.971	221.483	165.603	177.551	196.982	164.781	216.987	0.799883	0.7	0.902214	0.887421	0.7	0.80192
Q8K3X6	Anks4b	ANS4B	422	single	K.QVLQQPGQLVDTS#L.-	579.543	590.553	603.773	571.047	531.188	487.193	547.999	485.587	625.301	0.899474	0.1	0.449082	0.927942	0.7	0.80192
Q80UU1	Ankzf1	ANKZ1	696	single	R.LAAQLGAPS#PPVPDSAVASAGR.C	120.846	131.82	109.069	152.045	126.511	109.482	191.649	174.365	175.938	1.04688	0.7	0.902214	1.45588	0.1	0.218592
Q80UU1	Ankzf1	ANKZ1	86	single	K.VS#PYSLEISEK.L	620.157	758.092	654.203	761.106	686.511	689.767	933.942	1128.88	819.18	1.05436	0.4	0.742218	1.4276	0.1	0.218592
Q8K298	Anln	ANLN	96	single	K.IEVGAPDLENTEPIDVAKPCS#PMPAPR.Q	46.8706	56.611	52.3358	73.1868	73.468	90.8572	19.4455	8.59878	17.5164	1.40378	0.1	0.449082	0.334692	0.1	0.218592
Q8K298	Anln	ANLN	293	single	K.ASS#PVTAATFITENR.E	161.9	207.59	185.681	259.017	190.314	212.344	113.238	119.398	164.721	1.1436	0.2	0.571462	0.643025	0.2	0.344665
Q8BHY3	Ano1	ANO1	948	single	R.DVPCNNHSPTTHPEAGDGS#PVPSYEYHGDAL.-	229.494	386.412	310.54	255.903	179.511	231.958	180.395	165.765	168.075	0.746948	0.4	0.742218	0.541235	0.1	0.218592
Q8BHY3	Ano1	ANO1	106	single	K.GS#PVDAGSPEVPMDYHEDDK.R	343.673	416.469	519.281	393.854	330.121	410.092	421.935	743.233	549.348	0.945698	0.4	0.742218	1.31906	0.2	0.344665
Q9CZ52	Antxr1	ANTR1	360	single	K.EVPPPPVEES#EEEDDDGLPK.K	834.817	835.405	975.194	675.239	562.272	665.163	824.825	613.285	854.829	0.796217	0.1	0.449082	0.987336	0.4	0.557775
P10107	Anxa1	ANXA1	37	single	K.GGPGSAVS#PYPSFNVSSDVAALHK.A	20.1254	49.1952	31.8921	60.8814	56.4997	48.7272	67.0999	107.95	68.1885	1.77159	0.2	0.571462	2.1381	0.1	0.218592
A6NMY6	ANXA2P2	AXA2L	24	single	K.LSLEGDHSTPPSAY#GSVK.A	51.787	371.58	261.337	324.282	134.459	190.852	189.609	236.122	160.6	0.730292	1	1	0.725535	0.7	0.80192
P97429	Anxa4	ANXA4	12	single	K.AAS#GFNATEDAQTLR.K	60.9162	100.545	119.093	90.8211	142.283	62.8028	295.671	233.313	258.157	0.903293	1	1	2.56759	0.1	0.218592
Q07076	Anxa7	ANXA7	311	single	R.QS#VNHQMAQEDAQR.L	121.273	115.768	253.701	208.204	264.834	126.144	480.523	339.635	461.905	1.71682	0.4	0.742218	3.80879	0.1	0.218592
E9PYF7	Ap1ar	E9PYF7	168	single	R.SS#RLSSDATVLTPNTESSCDLMTK.T	344.524	324.03	354.541	364.79	281.963	338.103	302.989	348.485	297.567	0.981362	1	1	0.879441	0.4	0.557775
P61967	Ap1s1	AP1S1	147	single	K.AIEQADLLQEEDES#PR.S	18.6464	27.5949	25.3992	13.7295	31.0882	24.7887	25.6636	18.7123	23.8787	0.975963	1	1	0.940135	1	1
P17426	Ap2a1	AP2A1	655	single	R.DTSSNDINGGVEPTPSTVSTPS#PSADLLGLR.A	11.0601	10.7218	18.965	7.44757	10.9651	9.25881	16.0338	6.77601	10.5361	0.837138	0.2	0.571462	0.952626	0.4	0.557775
Q9Z1T1	Ap3b1	AP3B1	291	single	K.S#YAMDPDHR.L	46.3082	46.9171	48.2948	48.4706	48.5191	63.2149	13.7736	19.9078	20.2677	1.03415	0.1	0.449082	0.424319	0.1	0.218592
Q9Z1T1	Ap3b1	AP3B1	680	single	K.KFYS#ES#EEEEDEDEDEDEEEEEK.E	290.5	358.652	399.293	434.006	671.616	484.07	1443.59	789.774	516.507	1.34969	0.1	0.449082	2.20206	0.1	0.218592
Q9Z1T1	Ap3b1	AP3B1	678	single	K.FYS#ES#EEEEDEDEDEDEEEEEK.E	116.828	142.314	154.271	156.796	214.092	163.593	327.218	221.463	147.211	1.14952	0.1	0.449082	1.55616	0.2	0.344665
Q9Z1T1	Ap3b1	AP3B1	677	single	K.FY#S#ESEEEEDEDEDEDEEEEEK.E	17.6426	23.3546	26.9793	20.3563	29.5368	23.6394	47.9509	31.4319	22.3529	1.0122	0.7	0.902214	1.34586	0.4	0.557775
Q9Z1T1	Ap3b1	AP3B1	274	single	K.NFY#ESEEEEEEK.E	786.677	1087.61	1610.6	670.488	964.077	1045.04	912.943	948.008	1230.41	0.886415	0.4	0.742218	0.871641	1	1
Q9Z1T1	Ap3b1	AP3B1	276	single	K.NFYES#EEEEEEK.E	3200.9	4649.82	6138.66	2949	4012.16	4196.54	4095.23	3711	5337.11	0.862865	0.4	0.742218	0.880729	1	1
O54774	Ap3d1	AP3D1	755	single	K.RRHS#S#LPTES#DEDIAPAQR.V	52.5715	59.6477	74.5713	70.403	70.4177	58.5765	157.246	158.314	141.138	1.18031	1	1	2.63625	0.1	0.218592
O54774	Ap3d1	AP3D1	758	single	R.HSSLPT#ES#DEDIAPAQR.V	2.16316	7.93525	12.3561	10.3769	9.17912	7.01334	23.2626	25.656	24.0969	1.15675	1	1	3.03669	0.1	0.218592
O54774	Ap3d1	AP3D1	632	single	K.KVPVPEGLDLDAWINEPPS#DSESEDEKPK.A	105.766	134.674	284.109	81.6499	156.281	77.3062	488.085	281.791	445.722	0.60628	0.4	0.742218	3.30964	0.2	0.344665
O54774	Ap3d1	AP3D1	784	single	R.VDIITEEMPENALPS#DEDDK.D	1737.4	1913.91	2812.02	2087.28	1831.58	1588.02	2529.96	3210.81	2571.41	0.956988	0.7	0.902214	1.34354	0.4	0.557775
O54774	Ap3d1	AP3D1	760	single	R.HSSLPT#ES#DEDIAPAQR.V	376.451	372.074	488.352	438.503	341.496	330.68	428.831	439.01	460.484	0.907148	0.4	0.742218	1.16618	0.7	0.80192
Q80V94	Ap4e1	AP4E1	962	single	K.IIEQPECSS#PVIETER.T	1593.81	1774.39	1657.93	2156.65	2131.88	2054.76	1613.13	1438.42	1182.22	1.28587	0.1	0.449082	0.867597	0.2	0.344665
Q80V94	Ap4e1	AP4E1	857	single	R.SESLSGPPS#AEK.L	166.968	144.842	222.613	142.781	139.576	143.518	278.275	260.555	277.688	0.855143	0.1	0.449082	1.66313	0.1	0.218592
Q80V94	Ap4e1	AP4E1	675	single	R.QS#PAGISLGSDISGNSAETGLK.E	169.684	174.108	206.441	183.064	142.443	152.066	143.749	91.8151	165.363	0.8734	0.4	0.742218	0.825635	0.1	0.218592
B2RUJ5	Apba1	APBA1	267	single	R.MDS#YEQEEDIDQIVAEVK.Q	462.899	368.862	379.38	361.427	311.75	356.448	174.257	201.356	169.629	0.939553	0.1	0.449082	0.459321	0.1	0.218592
B2RUJ5	Apba1	APBA1	87	single	R.SASTES#GFHNHTDTAEGDVLAAAR.D	161.093	224.823	248.077	222.632	130.802	150.511	119.944	106.729	105.89	0.669465	0.2	0.571462	0.474722	0.1	0.218592
B2RUJ5	Apba1	APBA1	309	single	R.APT#PGGGHPDS#PGLPAPAGQQQR.V	26.8826	46.3316	35.7029	43.2562	32.1994	37.0024	24.8696	21.0545	21.9414	1.0364	1	1	0.614556	0.1	0.218592
B2RUJ5	Apba1	APBA1	317	single	R.APT#PGGGHPDS#PGLPAPAGQQQR.V	98.1837	131.879	138.117	120.39	111.489	89.6603	142.653	116.139	143.238	0.845387	0.4	0.742218	1.0817	0.4	0.557775
B2RUJ5	Apba1	APBA1	246	single	R.LHHYDERS#DGESDSPEK.E	269.126	19.0317	41.3762	187.567	50.4268	154.737	32.5331	34.1632	20.9509	3.73975	0.7	0.902214	0.786276	0.7	0.80192
Q8R5A3	Apbb1ip	AB1IP	537	single	R.RSSDTCGS#PALPSK.V	1101.09	968.904	1166.53	1260.65	1335.61	748.819	317.005	217.911	301.725	1.14492	0.7	0.902214	0.274025	0.1	0.218592
Q8R5A3	Apbb1ip	AB1IP	534	single	R.RSSDT#CGSPALPSK.V	250.724	227.73	200.574	267.671	303.129	361.459	73.1476	60.39	62.1166	1.33109	0.1	0.449082	0.272765	0.1	0.218592
Q8R5A3	Apbb1ip	AB1IP	532	single	R.RSS#DTCGSPALPSK.V	1101.37	1116.45	826.698	1412.39	1402.2	1625.79	311.144	283.826	376.055	1.28239	0.1	0.449082	0.282506	0.1	0.218592
Q8R5A3	Apbb1ip	AB1IP	507	single	K.QGLGNHS#PGATR.E	1143.82	128.541	186.548	638.173	346.894	642.726	151.267	108.835	86.2426	3.42095	0.7	0.902214	0.583416	0.2	0.344665
Q9DBR4	Apbb2	APBB2	334	single	K.GS#LSSVTPSPTPENEK.Q	710.86	751.24	764.709	894.414	835.719	684.791	457.593	551.947	523.308	1.11245	0.7	0.902214	0.696593	0.1	0.218592
Q9DBR4-2	Apbb2	APBB2	334	single	K.GS#LSSVTPSPTPENEDLHAATVNPDPSLK.E	7.9142	10.2363	13.3508	16.9739	13.0995	17.0313	2.53688	7.07914	6.96243	1.6582	0.2	0.571462	0.680171	0.1	0.218592
Q9DBR4-2	Apbb2	APBB2	123	single	K.NLS#PAAVINLTSEK.L	263.733	363.981	376.357	359.598	313.491	295.208	372.798	441.266	549.822	0.861285	0.7	0.902214	1.21233	0.2	0.344665
Q9DBR4-2	Apbb2	APBB2	391	single	R.NAPHGDDDDSCSINS#DPEAK.C	143.811	128.852	176.397	144.132	100.821	93.6529	139.742	121.305	95.2861	0.701068	0.4	0.742218	0.843504	0.2	0.344665
B2RUG9	Apc	B2RUG9	1437	single	K.T#PPPPPQTVQAK.R	462.429	288.48	443.226	360.049	343.013	361.215	93.5569	74.9335	165.002	0.812337	0.7	0.902214	0.211082	0.1	0.218592
B2RUG9	Apc	B2RUG9	1391	single	R.CTSVSS#LDS#FESR.S	560.585	481.435	696.836	439.204	357.068	337.678	277.368	114.195	244.892	0.636956	0.1	0.449082	0.436851	0.1	0.218592
B2RUG9	Apc	B2RUG9	2793	single	K.SS#ADSTSARPSQIPTPVSTNTK.K	632.64	463.789	595.947	627.655	654.287	637.504	199.476	242.221	320.568	1.06973	0.2	0.571462	0.406448	0.1	0.218592
B2RUG9	Apc	B2RUG9	2674	single	R.S#PTGNTPPVIDSVSEK.G	446.44	391.087	407.499	461.166	373.404	431.242	299.624	279.214	319.126	1.05827	1	1	0.735274	0.1	0.218592
B2RUG9	Apc	B2RUG9	2129	single	R.QAS#S#DSDSILSLK.S	369.437	383.036	393.901	700.993	872.204	607.448	224.388	446.799	260.155	1.8301	0.1	0.449082	0.679192	0.7	0.80192
B2RUG9	Apc	B2RUG9	1708	single	K.ISSIVT#PDLDDNK.A	485.523	457.751	508.771	464.03	461.343	388.837	309.782	243.914	375.153	0.950199	0.4	0.742218	0.638038	0.1	0.218592
B2RUG9	Apc	B2RUG9	2710	single	K.QSVGSGS#PVQTVGLETR.L	500.385	403.481	419.798	445.727	428.324	415.815	315.892	263.006	350.741	1.02031	1	1	0.752485	0.1	0.218592
B2RUG9	Apc	B2RUG9	2671	single	R.S#GRSPTGNTPPVIDSVSEK.G	645.132	667.194	735.313	789.535	853.482	668.36	525.134	526.875	595.323	1.18337	0.2	0.571462	0.789688	0.1	0.218592
B2RUG9	Apc	B2RUG9	1420	single	R.SIASSVQSEPCSGMVSGIISPS#DLPDSPGQTM*PPSR.S	27.3596	37.8265	45.69	42.338	38.4487	34.1079	20.118	19.1974	22.2952	1.01645	1	1	0.531849	0.1	0.218592
B2RUG9	Apc	B2RUG9	1969	single	R.NSSLSS#LSDIDQENNNNK.E	67.9553	71.91	120.843	69.9246	91.0488	68.6083	161.943	119.899	141.407	0.97239	1	1	1.96644	0.2	0.344665
B2RUG9	Apc	B2RUG9	1804	single	K.VNVNTEETFS#DNK.D	170.756	188.402	201.791	267.237	186.443	194.562	97.695	99.5473	154.594	1.0327	0.7	0.902214	0.528378	0.1	0.218592
B2RUG9	Apc	B2RUG9	2473	single	K.LEESASFES#LSPSSRPDS#PTR.S	451.144	387.527	464.809	351.88	360.348	312.767	474.525	399.394	497.824	0.779972	0.1	0.449082	1.05182	0.4	0.557775
B2RUG9	Apc	B2RUG9	958	single	K.RSS#NDS#LNSVTSSDGYGK.R	221.783	165.37	250.34	171.069	163.362	156.697	234.398	240.912	229.102	0.736583	0.2	0.571462	1.05688	0.7	0.80192
B2RUG9	Apc	B2RUG9	1030	single	K.YS#DEQLNSGR.Q	1288.88	687.696	1141.75	911.058	888.376	942.04	665.781	506.34	680.949	0.797951	0.7	0.902214	0.583125	0.1	0.218592
B2RUG9	Apc	B2RUG9	2130	single	R.QAS#S#DSDSILSLK.S	171.299	203.702	191.574	232.287	193.106	176.013	237.931	207.765	253.131	1.00799	0.7	0.902214	1.24198	0.1	0.218592
B2RUG9	Apc	B2RUG9	2092	single	K.DLQRPDSEHAFS#PDSENFDWK.A	31.2626	64.5926	43.877	63.7191	33.2981	41.3863	72.1647	71.4774	61.9302	0.943235	1	1	1.62904	0.2	0.344665
B2RUG9	Apc	B2RUG9	1370	single	K.S#PPEHYVQETPLVFSR.C	24.3265	16.9152	30.0855	21.0191	22.2111	24.3738	31.6206	28.3955	24.6318	0.913042	1	1	1.16727	0.4	0.557775
B2RUG9	Apc	B2RUG9	2569	single	R.RTGS#SSSILSASSESSEK.A	324.214	369.58	375.423	540.018	408.036	380.622	365.046	502.136	390.432	1.10405	0.1	0.449082	1.05642	0.4	0.557775
B2RUG9	Apc	B2RUG9	2260	single	K.S#PSEGPGATTSPR.G	41.5439	6.83159	7.34999	48.3735	21.8274	28.1233	25.6244	17.8124	13.7798	3.82631	0.4	0.742218	2.42347	0.7	0.80192
B2RUG9	Apc	B2RUG9	2087	single	K.DLQRPDS#EHAFS#PDSENFDWK.A	95.5584	183.262	124.735	196.037	147.909	129.917	119.326	135.958	136.681	1.18578	0.4	0.742218	1.08997	1	1
B2RUG9	Apc	B2RUG9	1859	single	R.NDS#LSSLDFDDDDVDLSR.E	214.405	180.868	294.998	223.072	222.018	185.091	189.601	229.615	272.019	1.0355	1	1	1.07094	1	1
B2RUG9	Apc	B2RUG9	109	single	R.SGECS#PVPMGSFPR.R	88.3436	145.534	122.81	164.284	103.029	105.169	155.984	83.0235	118.508	0.856353	1	1	0.964967	1	1
Q9Z1K7	Apc2	APC2	2143	single	R.VSS#PEDSPAGTPQR.K	19.4363	15.1353	13.1907	19.8384	22.164	16.6782	15.1807	16.945	13.6595	1.31073	0.2	0.571462	1.003	1	1
Q8R146	Apeh	APEH	27	single	R.QPSLS#AACLGPEVTTQYGGLYR.T	30.5238	44.9642	44.7734	41.4176	43.8568	38.8637	52.1355	56.0464	50.3491	0.925049	0.7	0.902214	1.16443	0.1	0.218592
Q9D842	Aplf	APLF	149	single	K.TTGASQLQGS#PEITK.T	1804.11	1472.93	1699.86	1761.07	1769.2	1490.33	1188.2	868.761	1351.31	1.03601	1	1	0.699003	0.1	0.218592
Q9D842	Aplf	APLF	131	single	K.S#PVVNLPDK.T	1592.61	1272.85	1627.44	1560.47	1324.79	1218.06	1094.23	999.048	1405.28	0.831838	0.4	0.742218	0.68707	0.2	0.344665
Q9D842	Aplf	APLF	455	single	R.VALDEDDDDVGQPS#DDEDEEDYEPTDEDSDWHPGK.D	106.559	233.783	282.778	166.352	200.944	126.34	265.37	109.979	216.673	0.711564	0.7	0.902214	0.926814	1	1
Q9D842	Aplf	APLF	348	single	K.SQGCHPESSS#APSS#PDALHTDTADPVLGCSEESK.V	11.4528	31.1944	31.3205	34.9251	14.1553	21.842	26.9607	19.2349	10.8642	0.700191	1	1	0.616615	0.4	0.557775
Q8K4Z3	Apoa1bp	NNRE	43	single	R.RGS#ETMAGAAVK.Y	541.455	331.392	394.069	748.647	700.223	484.669	369.765	625.272	416.72	1.77691	0.2	0.571462	1.05748	0.7	0.80192
P06728	Apoa4	APOA4	333	single	R.QQLGPNS#GEVESHLSFLEK.S	235.119	156.756	159.457	223.04	126.97	242.931	230.852	202.925	189.99	1.39875	1	1	1.2726	0.7	0.80192
Q9WV35	Apobec2	ABEC2	15	single	K.EEAAEAAAPAS#QNGDDLENLEDPEK.L	141.018	216.189	168.193	186.079	171.983	164.35	162.134	284.549	180.349	1.02253	1	1	1.07227	0.7	0.80192
Q8VBT6	Apobr	APOBR	398	single	K.RNS#WATEPTLVLDTEAK.D	380.565	344.953	346.17	315.221	236.834	236.18	183.261	183.775	206.587	0.684155	0.1	0.449082	0.530881	0.1	0.218592
Q8VBT6	Apobr	APOBR	699	single	K.QSGQEVGLVGS#AEK.V	495.068	355.072	415.609	402.285	322.774	300.264	246.234	295.149	287.141	0.776629	0.2	0.571462	0.690892	0.1	0.218592
P08226	Apoe	APOE	139	single	R.NEVHTMLGQS#TEEIR.A	134.398	159.368	186.229	192.793	156.036	150.432	175.839	182.418	172.13	0.979095	1	1	1.10335	0.7	0.80192
G3X9D6	Apon	G3X9D6	115	single	K.SS#QEEGIGNNEVILR.H	460.088	407.494	447.157	341.329	385.437	297.066	251.578	241.702	289.171	0.763332	0.1	0.449082	0.562617	0.1	0.218592
P12023	App	A4	441	single	K.VES#LEQEAANER.Q	292.615	368.686	341.524	347.677	261.116	244.31	281.232	291.583	298.844	0.764561	0.4	0.742218	0.853771	0.2	0.344665
Q8K3H0	Appl1	DP13A	403	single	R.VNQSALEAVTPSPS#FQQR.H	205.911	280.542	246.847	226.834	214.509	236.997	134.306	118.757	129.189	0.918925	0.7	0.902214	0.523358	0.1	0.218592
Q8K3H0	Appl1	DP13A	691	single	R.LIAASSRPNQAGSEGQLVLSSSQS#EESDLGEEGK.K	53.0227	80.2575	62.8872	73.8097	73.089	78.9537	78.5583	68.834	80.8128	1.17368	0.7	0.902214	1.24919	0.4	0.557775
Q8K3G9	Appl2	DP13B	420	single	K.NS#DIEDDNIVPK.A	123.54	154.035	209.531	155.251	171.778	164.654	195.696	215.1	167.685	1.06894	0.7	0.902214	1.27047	0.4	0.557775
Q8K3G9	Appl2	DP13B	651	single	K.YVLLNDQADDTGGS#PSENR.G	602.746	842.263	959.789	729.934	717.328	702.344	899.834	681.426	875.271	0.851667	0.7	0.902214	1.03919	1	1
Q02013	Aqp1	AQP1	246	single	K.VWT#SGQVEEYDLDADDINSR.V	98.7797	157.004	130.498	89.6086	105.364	138.946	59.1112	90.9189	100.794	0.807398	0.7	0.902214	0.696708	0.2	0.344665
P55088	Aqp4	AQP4	322	single	K.DSSGEVLSS#V.-	142.439	191.71	242.494	187.679	177.121	198.802	107.079	141.841	131.448	0.978975	1	1	0.685662	0.1	0.218592
P55088	Aqp4	AQP4	276	single	K.GS#YMEVEDNR.S	502.539	671.605	757.571	717.895	1398.06	820.669	538.085	546.899	1043.29	1.22195	0.2	0.571462	0.814317	1	1
P55088	Aqp4	AQP4	321	single	K.DSSGEVLS#SV.-	84.5964	92.3876	122.32	117.742	98.6107	114.824	83.0319	117.417	119.41	1.24286	0.7	0.902214	1.27092	1	1
Q4LDD4	Arap1	ARAP1	742	single	K.HYSVT#LPTVSHSGFLYK.T	173.191	564.14	218.836	496.874	358.267	575.798	116.671	244.976	146.831	2.27053	0.4	0.742218	0.670963	0.4	0.557775
Q4LDD4	Arap1	ARAP1	234	single	R.LLPEFDDSDY#DDVPEEGPGAPASVM*TK.E	207.591	321.199	284.71	461.711	268.571	274.968	356.596	226.161	366.341	0.965784	1	1	1.25249	0.4	0.557775
Q8CHG5	Arel1	AREL1	337	single	R.RPSTAIEEDDEDS#PSECHTPEK.V	281.819	594.204	576.987	325.808	292.48	476.361	340.717	86.287	293.789	0.564672	0.7	0.902214	0.509178	0.4	0.557775
Q9EPJ9	Arfgap1	ARFG1	384	single	K.NSNSDGWES#WEGASGEGR.A	26.7688	27.9404	26.8178	29.0918	21.9984	23.2905	10.4633	9.33243	10.6381	0.868473	0.7	0.902214	0.390164	0.1	0.218592
Q9EPJ9	Arfgap1	ARFG1	359	single	R.S#SDSWDVWGSGSASNNK.N	580.231	548.627	575.796	625.844	501.217	521.019	225.954	294.508	328.102	0.904867	0.7	0.902214	0.51148	0.1	0.218592
Q9EPJ9	Arfgap1	ARFG1	360	single	R.RSS#DSWDVWGSGSASNNK.N	1068.39	1090.51	1166.85	1190.49	1096.37	1029.97	613.943	881.705	777.157	1.00537	1	1	0.712654	0.1	0.218592
Q9EPJ9	Arfgap1	ARFG1	347	single	K.AKS#PSSDS#WTCADASTGR.R	406.694	479.914	485.785	589.602	336.472	356.255	217.04	280.582	205.29	0.74233	0.7	0.902214	0.452248	0.1	0.218592
Q9EPJ9	Arfgap1	ARFG1	135	single	K.EWSLESSPAQNWT#PPQPK.T	9.97247	14.6435	16.1457	14.3876	15.6115	9.9358	17.0864	19.0948	17.5239	0.982526	0.7	0.902214	1.1967	0.1	0.218592
Q9EPJ9	Arfgap1	ARFG1	342	single	K.S#PSSDSWTCADASTGR.R	1050.49	972.581	1202.55	1026.75	773.532	719.103	794.671	978.639	683.091	0.736351	0.2	0.571462	0.756473	0.2	0.344665
Q99K28	Arfgap2	ARFG2	431	single	K.AIS#SDM*FFGR.E	1454.49	1970.65	1384.2	3380.89	3484.44	2343.16	1027.6	2317.64	1334.93	2.32444	0.1	0.449082	0.917798	0.7	0.80192
Q99K28	Arfgap2	ARFG2	145	single	R.HGTDLWIDSMNSAPSHS#PEK.K	133.59	407.787	277.144	232.051	170.854	229.867	192.534	293.919	185.098	0.829415	0.7	0.902214	0.694708	1	1
Q9D8S3	Arfgap3	ARFG3	377	single	R.SSSFSS#WDDGADSYWK.K	383.833	480.618	322.398	577.605	506.246	515.777	103.805	137.742	195.683	1.34376	0.1	0.449082	0.35886	0.1	0.218592
Q9D8S3	Arfgap3	ARFG3	202	single	K.HEGGPGQGPSVEGLNT#PGK.A	124.393	298.986	197.24	512.229	310.233	417.085	141.397	246.75	166.534	2.11461	0.1	0.449082	0.844322	1	1
Q9D8S3	Arfgap3	ARFG3	196	single	K.HEGGPGQGPS#VEGLNTPGK.A	141.711	171.708	153.268	229.613	166.201	183.061	103.155	147.696	148.205	1.19439	0.2	0.571462	0.963644	0.4	0.557775
Q9D8S3	Arfgap3	ARFG3	241	single	K.LTNTS#FTEIEK.Q	490.896	489.557	427.283	636.166	1059.43	882.462	300.446	845.751	454.682	1.80257	0.1	0.449082	0.928763	1	1
Q9D8S3	Arfgap3	ARFG3	143	single	R.HGTDLWLDSCAAPPVS#PPPK.E	74.6738	538.711	315.206	280.788	199.425	162.612	294.147	257.191	206.157	0.632682	0.7	0.902214	0.815948	0.7	0.80192
G3X9K3	Arfgef1	BIG1	394	single	R.LSVSS#NDTQESGNSSGPSPGAK.F	377.63	547.966	842.904	475.691	543.748	464.552	1241.18	1173.3	1219.69	0.868102	0.7	0.902214	2.22586	0.1	0.218592
G3X9K3	Arfgef1	BIG1	289	single	K.SLQDDTEPENGSDIS#SAENEQTEADQATAAETLSK.N	91.5799	127.373	211.992	95.639	149.421	92.1879	389.896	342.788	307.139	0.750858	1	1	2.69122	0.1	0.218592
G3X9K3	Arfgef1	BIG1	661	single	R.YGS#LNSLESTSSSGIGSYSTQM*SGTDNPEQFEVLK.Q	18.9961	24.7964	29.9551	19.7589	25.0683	24.3779	29.914	33.346	32.0809	0.983121	1	1	1.29377	0.2	0.344665
G3X9K3	Arfgef1	BIG1	234	single	R.QQQHLLQS#PVSHHEPESPHLR.Y	54.6132	217.586	148.298	87.7495	60.4162	123.899	107.557	73.0007	140.55	0.591709	0.7	0.902214	0.725274	0.7	0.80192
A2A5R2	Arfgef2	BIG2	356	single	R.QSLSS#ADNLEPDVQGHQVAAR.F	138.349	207.037	330.717	144.544	200.742	190.319	443.286	379.294	350.792	0.919252	0.7	0.902214	1.83201	0.1	0.218592
A2A5R2	Arfgef2	BIG2	1518	single	R.HLDVDLDRQS#LSSIDR.N	168.122	288.916	299.558	306.93	248.05	326.105	159.662	210.095	174.693	1.06235	0.4	0.742218	0.604649	0.4	0.557775
A2A5R2	Arfgef2	BIG2	1535	single	R.GQSQLS#NPTDDSWK.G	184.625	251.522	358.88	195.433	211.51	197.158	289.051	383.358	314.103	0.783859	0.7	0.902214	1.24881	0.4	0.557775
A2A5R2	Arfgef2	BIG2	621	single	R.RCS#VTSVESTVSSGTQTAIQDDPEQFEVIK.Q	134.664	246.077	260.832	248.255	170.803	219.737	220.35	196.918	178.346	0.892958	1	1	0.800229	0.7	0.80192
Q3UGY8	Arfgef3	BIG3	1645	single	R.VAAPSS#SPSAEAEYWR.I	48.0691	51.1635	52.83	37.4716	39.9987	41.6491	41.7941	41.8538	54.8605	0.781781	0.1	0.449082	0.81804	0.7	0.80192
Q3UGY8	Arfgef3	BIG3	632	single	R.SDVSDIGSDNCS#LADEEQTPR.D	74.6086	115.242	96.475	133.072	69.5667	91.0441	57.2785	58.4237	56.4383	0.943706	1	1	0.593714	0.1	0.218592
Q3UGY8	Arfgef3	BIG3	1046	single	K.TSGSS#GLLGEIEFK.S	243.564	344.684	282.679	222.977	170.49	357.727	196.578	92.5513	233.109	0.788798	0.7	0.902214	0.695409	0.1	0.218592
Q3UGY8	Arfgef3	BIG3	628	single	R.SDVSDIGS#DNCSLADEEQTPR.D	243.535	324.22	470.616	287.276	242.18	207.454	523.137	326.575	302.822	0.746961	0.2	0.571462	1.00726	0.7	0.80192
Q3UGY8	Arfgef3	BIG3	471	single	R.LEELRDGAESSRDS#MEINEADFR.W	92.8342	161.251	158.845	150.66	97.6651	123.192	133.69	159.692	141.238	0.775548	0.7	0.902214	0.88916	1	1
E9Q3G5	Arfip1	E9Q3G5	39	single	K.HSLPS#GLGLSETQITSHGFDSTK.E	63.85	368.391	49.3701	728.767	388.955	471.039	20.6769	20.5779	36.7892	7.37727	0.1	0.449082	0.323836	0.1	0.218592
E9Q3G5	Arfip1	E9Q3G5	79	single	K.EGVTEAGAPQGSSAPPLPCVLS#PSR.V	30.2371	81.9929	62.6756	81.0159	52.2026	53.7137	120.056	59.4954	78.2077	0.857012	1	1	1.24782	0.7	0.80192
Q8K221	Arfip2	ARFP2	78	single	R.HPS#HSTSPS#GPGDEVAR.G	30.5423	27.35	23.6857	101.091	32.1804	53.2038	34.4164	45.9312	29.3405	1.94529	0.1	0.449082	1.25837	0.2	0.344665
Q5FWK3	Arhgap1	RHG01	51	single	K.SS#S#PEPVTHLK.W	25.072	46.6183	53.8196	290.756	72.7252	86.0897	228.968	265.66	179.716	1.84669	0.1	0.449082	4.91155	0.1	0.218592
Q5FWK3	Arhgap1	RHG01	35	single	K.NWPS#DEMPDFPK.S	171.994	203.635	230.511	144.353	155.464	158.064	183.614	160.93	216.926	0.763444	0.1	0.449082	0.90168	0.7	0.80192
Q6Y5D8	Arhgap10	RHG10	591	single	R.TSPDTTFAEPTCLSAS#PPNAPPR.Q	184.593	293.031	228.177	143.304	144.059	200.699	138.539	59.7207	136.895	0.631349	0.2	0.571462	0.599952	0.1	0.218592
Q80Y19	Arhgap11a	RHGBA	659	single	R.NFS#PDQS#PEFAR.E	556.371	492.124	652.224	618.086	574.8	620.241	519.594	427.437	471.287	1.11092	0.7	0.902214	0.847074	0.2	0.344665
Q80Y19	Arhgap11a	RHGBA	708	single	K.ADPLILQAFPGEEPAEEPQS#PR.N	140.296	166.437	190.728	268.451	183.297	187.491	162.957	135.425	154.027	1.1265	0.4	0.742218	0.925438	0.4	0.557775
Q80Y19	Arhgap11a	RHGBA	655	single	R.NFS#PDQS#PEFAR.E	213.305	219.165	280.18	293.498	242.39	245.881	255.631	260.243	235.2	1.1219	0.4	0.742218	1.16639	0.7	0.80192
Q8C0D4	Arhgap12	RHG12	584	single	K.VLSSTINNQVAEADEAAEEETPDS#PGVEK.H	83.7196	122.311	120.567	115.59	144.37	122.839	224.171	231.264	247.866	1.01884	0.4	0.742218	1.91814	0.1	0.218592
Q8C0D4	Arhgap12	RHG12	211	single	R.IQQDS#ES#GDELSSSSTEQM*R.A	100.83	110.217	143.009	111.814	89.4993	67.7923	130.343	153.251	144.12	0.812026	0.4	0.742218	1.3076	0.2	0.344665
Q8C0D4	Arhgap12	RHG12	229	single	R.ATT#PPNQGRPDS#PVYANLQELK.I	57.9425	50.875	60.2826	58.7401	47.8848	56.7232	71.9733	91.0485	65.7604	0.978958	0.7	0.902214	1.24215	0.1	0.218592
Q8C0D4	Arhgap12	RHG12	444	single	K.LCLPENES#PPTSSK.H	403.186	445.716	488.182	479.521	466.858	439.845	642.032	586.805	455.186	1.04743	1	1	1.31655	0.2	0.344665
Q8C0D4	Arhgap12	RHG12	199	single	K.TSFSQEQSCDS#AGEGSER.I	364.816	362.651	415.582	534.515	328.482	310.462	428.805	336.7	313.02	0.900404	0.7	0.902214	0.922931	0.7	0.80192
Q8C0D4	Arhgap12	RHG12	213	single	R.IQQDS#ES#GDELSSSSTEQM*R.A	376.99	389.977	434.557	499.049	379.77	356.935	401.051	456.068	369.098	0.973827	1	1	1.0284	1	1
Q3UIA2	Arhgap17	RHG17	669	single	R.S#PSPPQQQQQQQQQQQQQQQQQTPGM*R.R	60.1617	57.449	76.451	72.8961	71.2443	63.1865	50.235	45.7012	48.4767	1.18421	0.7	0.902214	0.805773	0.1	0.218592
Q3UIA2	Arhgap17	RHG17	575	single	R.ADSSSGGGPVFSSTGILEQGLSPGDSS#PPKPK.D	785.245	863.272	912.05	884.723	864.401	790.931	692.298	522.882	767.428	1.00131	1	1	0.801947	0.1	0.218592
Q3UIA2	Arhgap17	RHG17	730	single	R.LGEQGPEPGPT#PPQT#PTPPS#T#PPLAK.Q	46.5037	52.1679	45.7748	56.7896	92.2822	48.4674	40.9933	24.9717	50.0153	1.22118	0.2	0.571462	0.881507	0.4	0.557775
Q3UIA2	Arhgap17	RHG17	162	single	K.SS#GTNFQGLPSK.I	1568.18	1742.39	1671.4	2285.08	1687.55	2651.23	1089.57	2953.63	1881.35	1.36717	0.2	0.571462	1.12561	0.7	0.80192
Q8K0Q5	Arhgap18	RHG18	63	single	R.S#SSQDSLDESM*EAYWTELENIK.R	23.1381	21.1831	31.477	41.1362	17.4124	18.3823	38.0887	35.656	42.8933	0.794464	0.7	0.902214	1.64615	0.1	0.218592
Q6IFT4	Arhgap20	RHG20	730	single	K.SS#CDAVLSR.K	452.137	419.086	473.385	479.832	319.153	470.793	299.574	238.927	224.911	1.04126	1	1	0.52844	0.1	0.218592
Q6IFT4	Arhgap20	RHG20	704	single	R.SS#EPSIDYLDTK.L	528.917	605.953	550.037	602.526	452.334	518.837	533.828	641.369	605.175	0.943275	0.4	0.742218	1.10024	0.7	0.80192
Q6DFV3	Arhgap21	RHG21	850	single	R.QLS#HDQESVGPPSLDGQHSSK.T	166.248	157.3	172.001	190.115	189.519	190.279	102.472	116.159	103.901	1.14357	0.1	0.449082	0.624977	0.1	0.218592
Q6DFV3	Arhgap21	RHG21	1621	single	K.GDEADDERSELVSEGRPVET#DS#ESEFPVFPTTLTSDR.L	50.0048	45.5642	38.5859	43.0895	69.5711	57.7146	91.7012	82.949	73.9999	1.26667	0.4	0.742218	1.82049	0.1	0.218592
Q6DFV3	Arhgap21	RHG21	686	single	K.TS#PQLSENLGTSDLELPAIPR.N	38.5125	43.9041	51.3859	48.4026	48.9428	41.2071	56.4502	65.9224	79.9766	1.10246	1	1	1.50151	0.1	0.218592
Q6DFV3	Arhgap21	RHG21	1655	single	R.RNS#EGS#EASCTEGSLTPSLDSR.R	127.037	58.8393	47.858	205.413	149.423	171.236	105.145	119.835	63.5116	2.91023	0.1	0.449082	1.78699	0.7	0.80192
Q6DFV3	Arhgap21	RHG21	917	single	K.GS#SSEVFSDAAR.E	1235.54	1703.77	1949.83	1921.97	2135.62	1662.52	2174.02	2986.1	2761.75	1.12807	0.7	0.902214	1.62097	0.1	0.218592
Q6DFV3	Arhgap21	RHG21	43	single	K.DQGEPVSPS#EDEPFSWPGPK.T	1430.35	1268.8	1709.99	1647.27	1458.09	1294.18	1728.35	2177	2309.86	1.01939	1	1	1.52201	0.1	0.218592
Q6DFV3	Arhgap21	RHG21	1425	single	K.AQPS#S#SEDELDSVFFK.K	1133.85	1301.42	1268.07	1412.04	1302.91	1113.76	1504.8	2275.19	1682.94	1.02748	0.7	0.902214	1.32717	0.1	0.218592
Q6DFV3	Arhgap21	RHG21	874	single	K.S#YDEGLDDYREDAK.L	268.406	264.5	347.091	344.167	290.145	256.427	355.787	575.512	444.491	1.08099	1	1	1.65604	0.1	0.218592
Q6DFV3	Arhgap21	RHG21	1623	single	K.GDEADDERSELVSEGRPVET#DS#ESEFPVFPTTLTSDR.L	62.9133	71.1763	53.9478	61.7196	134.456	99.8107	137.904	125.09	101.846	1.58648	0.4	0.742218	1.98829	0.1	0.218592
Q6DFV3	Arhgap21	RHG21	250	single	R.MEIQVPPSPT#DVAK.S	226.011	234.543	189.842	275.928	253.66	230.939	234.735	175.144	257.536	1.12234	0.2	0.571462	1.0386	0.7	0.80192
Q8BL80	Arhgap22	RHG22	387	single	R.GEPGS#PGLPTHR.T	910.772	960.142	1141.11	856.461	800.138	684.526	693.812	458.855	804.866	0.833354	0.1	0.449082	0.722614	0.1	0.218592
Q8BL80	Arhgap22	RHG22	397	single	R.TSS#LDGPAAAVLSR.T	182.811	233.857	205.781	219.292	187.72	182.38	161.259	152.343	186.278	0.912231	0.7	0.902214	0.783643	0.2	0.344665
Q69ZH9	Arhgap23	RHG23	361	single	R.S#AEALGPGALVS#PR.L	365.921	316.304	326.924	315.24	263.827	247.49	109.139	86.6264	153.179	0.806998	0.1	0.449082	0.333838	0.1	0.218592
Q69ZH9	Arhgap23	RHG23	421	single	R.SYS#PSFQR.R	621.37	921.387	770.699	902.564	716.149	661.861	267.333	246.533	333.831	0.92922	1	1	0.346872	0.1	0.218592
Q69ZH9	Arhgap23	RHG23	515	single	R.QMNLGFGDES#PEPEAR.G	32.3671	45.9346	33.0834	31.3677	30.7467	39.5675	34.3532	39.6567	41.5119	0.94814	0.4	0.742218	1.19869	0.7	0.80192
Q69ZH9	Arhgap23	RHG23	673	single	K.RHS#TSDLSDATFSDIR.R	123.935	212.772	198.949	227.991	163.858	152.554	181.803	166.876	163.404	0.823618	1	1	0.83879	0.7	0.80192
Q8C4V1	Arhgap24	RHG24	601	single	R.SSTTTCPEQDFYVGNFEDPVLDGPPQDDLS#HPGDYENK.S	122.76	136.208	145.293	136.471	113.733	105.356	69.5598	61.6612	60.8086	0.834991	0.4	0.742218	0.452699	0.1	0.218592
Q8C4V1	Arhgap24	RHG24	397	single	R.SSVDNGS#PTALSGS#K.T	122.278	134.35	129.9	139.14	130.782	123.04	65.6828	78.1214	90.5859	1.00679	0.7	0.902214	0.601397	0.1	0.218592
Q8C4V1	Arhgap24	RHG24	414	single	K.LDISRS#PPLMVK.K	953.993	1032.15	956.371	826.313	702.669	630.517	635.658	672.316	697.539	0.734724	0.1	0.449082	0.702987	0.1	0.218592
Q8C4V1	Arhgap24	RHG24	390	single	R.SSVDNGS#PTALSGS#K.T	1969.11	1555.92	2482.79	1269.76	1391.95	1200.77	1758.21	1469.21	2039.16	0.644839	0.1	0.449082	0.892896	0.7	0.80192
Q8C4V1	Arhgap24	RHG24	494	single	R.MGILNTDTLGNS#LNGR.S	10.4168	26.4823	15.6516	15.4144	28.6288	25.5545	12.2486	16.9351	17.16	1.63271	0.7	0.902214	1.082	1	1
Q8BYW1	Arhgap25	RHG25	537	single	K.RDALVSTDS#EMEAGSK.N	234.572	278.838	221.048	247.864	342.816	159.9	80.4106	87.6033	87.5429	1.05666	1	1	0.373202	0.1	0.218592
Q8BYW1	Arhgap25	RHG25	400	single	R.TDSFSNT#ASSPDATSPTGPLPSDQHQEDSGK.A	67.9211	208.685	142.527	257.731	132.561	103.8	22.3829	17.4787	24.7355	0.930078	1	1	0.157043	0.1	0.218592
Q8BYW1	Arhgap25	RHG25	509	single	R.TSTYDNVPTS#PQSQGNPAGALSPPASDSK.R	135.9	150.157	165.455	161.065	131.591	123.188	150.279	218.463	176.68	0.876356	0.4	0.742218	1.17663	0.2	0.344665
A2AB59	Arhgap27	RHG27	297	single	R.ASVGS#GESLETEWGQYWDEESRR.V	146.638	132.454	221.543	124.698	145.253	85.3427	400.744	329.496	308.52	0.850378	0.2	0.571462	2.247	0.1	0.218592
A2AB59	Arhgap27	RHG27	458	single	R.KS#SQDSDTPAQASPPEEK.I	727.685	421.569	728.132	877.39	1127.84	765.71	1752.15	2694.5	1943.89	1.20573	0.1	0.449082	2.67133	0.1	0.218592
A2AB59	Arhgap27	RHG27	469	single	K.SSQDSDT#PAQAS#PPEEK.I	106.551	111.445	118.275	98.5027	104.568	88.3115	89.116	52.2141	77.1483	0.883872	0.1	0.449082	0.692258	0.1	0.218592
A2AB59	Arhgap27	RHG27	636	single	R.QNAASPSLS#PGGLESDLSR.V	735.658	846.696	861.557	653.412	850.692	868.087	964.287	885.757	1091.78	1.00472	1	1	1.13888	0.1	0.218592
A2AB59	Arhgap27	RHG27	634	single	R.QNAASPS#LSPGGLESDLSR.V	417.765	609.646	538.943	579.021	633.595	567.426	534.945	618.737	657.378	1.07436	0.4	0.742218	1.14806	0.4	0.557775
A2AB59	Arhgap27	RHG27	632	single	R.QNAAS#PSLS#PGGLESDLSR.V	196.741	318.669	286.742	309.3	332.636	304.789	267.233	293.947	348.669	1.07867	0.4	0.742218	1.02513	0.7	0.80192
A2AB59	Arhgap27	RHG27	464	single	R.KSS#QDSDT#PAQASPPEEK.I	553.256	504.889	668.135	544.465	524.213	515.517	516.091	475.222	563.831	0.947505	0.7	0.902214	0.932825	0.7	0.80192
Q8CGF1	Arhgap29	RHG29	521	single	K.LEEDRCS#NSADMTGPSFVR.S	138.838	208.985	186.197	195.553	155.336	218.998	103.034	104.032	79.6801	1.05024	0.7	0.902214	0.553358	0.1	0.218592
Q8CGF1	Arhgap29	RHG29	176	single	K.S#FENIS#VDSVDLPHEK.G	200.043	297.671	236.561	291.931	271.604	357.754	156.676	194.827	159.747	1.23406	0.4	0.742218	0.67529	0.1	0.218592
Q8CGF1	Arhgap29	RHG29	171	single	K.S#FENIS#VDSVDLPHEK.G	405.743	684.93	833.408	504.157	432.163	506.284	724.37	648.555	831.431	0.736071	0.7	0.902214	1.05758	1	1
Q640N3	Arhgap30	RHG30	875	single	R.GVGDHLEEGALSEGPGVELLRVDS#TEEINEQTSEM*K.Q	1031.5	859.132	1052.29	872.049	670.174	570.658	469.586	522.184	601.117	0.649707	0.2	0.571462	0.506236	0.1	0.218592
Q640N3	Arhgap30	RHG30	671	single	R.STS#DNREEAEATPETEMEAGK.A	1626.14	1090.41	1631.37	1273.73	781.234	798.281	668.09	743.761	771.716	0.490905	0.2	0.571462	0.457378	0.1	0.218592
Q640N3	Arhgap30	RHG30	669	single	R.S#TSDNREEAEATPETEMEAGK.A	669.157	450.639	552.902	593.983	353.386	313.179	360.51	371.583	361.864	0.639148	0.4	0.742218	0.654481	0.1	0.218592
A6X8Z5	Arhgap31	RHG31	850	single	K.GPGLPS#PTK.E	559.92	358.687	457.33	407.735	480.288	443.001	252.063	237.486	254.925	0.968669	1	1	0.551162	0.1	0.218592
A6X8Z5	Arhgap31	RHG31	1093	single	K.HRPSS#LNLDSATPIADLFR.L	509.447	731.69	702.123	765.584	532.552	558.046	400.869	407.966	388.525	0.794799	1	1	0.570938	0.1	0.218592
A6X8Z5	Arhgap31	RHG31	563	single	R.AECSQS#PPLDPGTQVEK.K	92.3875	84.4213	94.596	94.324	90.4461	59.2859	74.2158	53.459	62.0113	0.978986	0.7	0.902214	0.671209	0.1	0.218592
A6X8Z5	Arhgap31	RHG31	1163	single	R.NS#APVSVSAVR.T	264.068	182.232	201.307	251.613	188.605	134.208	208.399	299.131	258.18	0.936904	0.7	0.902214	1.28252	0.4	0.557775
Q811P8	Arhgap32	RHG32	935	single	R.VSEVIGTVSNTVAQNAS#PTSWDK.S	126.362	149.887	162.342	231.577	178.226	176.906	115.94	86.6592	152.513	1.18907	0.1	0.449082	0.773514	0.4	0.557775
Q811P8	Arhgap32	RHG32	952	single	R.DVINRS#PTQLQLGK.M	36.0793	33.7215	48.197	50.9021	37.8896	34.2205	32.3629	22.652	39.3302	1.05018	0.7	0.902214	0.896993	0.4	0.557775
Q811P8	Arhgap32	RHG32	954	single	R.SPT#QLQLGK.M	447.552	386.798	558.411	497.446	389.066	372.85	363.141	351.981	446.517	0.86932	0.7	0.902214	0.811394	0.2	0.344665
Q811P8	Arhgap32	RHG32	856	single	K.DAEAGGSQSQTPGSTASSEPVS#PVQEK.L	224.175	196.748	254.457	221.642	189.459	227.967	203.32	244.92	235.71	0.9887	0.7	0.902214	1.05146	1	1
Q811P8	Arhgap32	RHG32	706	single	K.S#EESLTSLHAVDGDSK.L	894.079	1410.54	1644.97	1631.63	659.062	1074.51	1316.02	1509.46	1207.42	0.761775	0.7	0.902214	0.932993	1	1
Q811P8	Arhgap32	RHG32	730	single	R.S#SSDALSASFNGDVLGNR.C	207.781	212.527	231.072	263.899	183.016	179.112	212.793	192.425	221.716	0.861142	0.7	0.902214	1.00125	1	1
Q91YM2	Arhgap35	RHG35	1134	single	K.AQSNGSGNGS#DSEM*DTSSLER.G	220.063	259.287	298.986	318.529	247.95	237.851	336.227	414.964	378.576	0.956276	1	1	1.46006	0.1	0.218592
Q91YM2	Arhgap35	RHG35	1105	single	R.NEEENIY#SVPHDSTQGK.I	69.0261	96.9708	100.864	103.714	73.5247	80.6316	113.945	170.753	115.026	0.831505	1	1	1.18619	0.1	0.218592
Q91YM2	Arhgap35	RHG35	589	single	K.NS#LSDLNIDR.I	246.146	308.261	380.634	535.842	458.42	554.707	690.448	2121.31	977.25	1.73827	0.1	0.449082	3.1702	0.1	0.218592
Q91YM2	Arhgap35	RHG35	975	single	R.AGS#PLCNSNLQDSEEDVEPPSYHLFR.E	54.1002	74.0895	72.6442	94.4319	86.0879	75.5486	78.0872	76.5788	73.048	1.18506	0.1	0.449082	1.05416	0.2	0.344665
Q91YM2	Arhgap35	RHG35	1179	single	R.TSFSVGS#DDELGPIR.K	248.571	339.773	364.81	305.87	279.768	281.816	316.361	593.333	364.617	0.829425	0.7	0.902214	1.07312	0.7	0.80192
Q91YM2	Arhgap35	RHG35	769	single	R.NLNLVS#STASIK.D	365.646	537.077	393.73	578.947	463.809	860.193	233.906	701.767	301.217	1.47042	0.2	0.571462	0.765034	0.7	0.80192
Q91YM2	Arhgap35	RHG35	970	single	K.NIIEATHMYDNVAEACSTTEEVFNS#PR.A	53.8125	77.9648	115.041	70.758	55.392	67.6105	93.7406	66.3205	69.7452	0.867192	0.7	0.902214	0.894573	1	1
P59281	Arhgap39	RHG39	362	single	K.QTPTS#PCQQLMR.T	62.5529	77.4512	61.1001	101.221	72.4808	73.7981	66.6289	49.3242	54.7448	1.17977	0.4	0.742218	0.875177	0.4	0.557775
P59281	Arhgap39	RHG39	244	single	R.RPSGS#QHSPNLQTFVPDTDGTVFFPER.R	9.65467	22.1925	12.932	24.44	11.3615	19.9851	21.6984	30.7286	29.8616	1.5454	0.7	0.902214	2.30912	0.2	0.344665
P59281	Arhgap39	RHG39	683	single	R.KPSS#ETDIENWASK.H	495.675	768.648	786.575	700.735	604.486	790.28	706.898	1206.86	902.897	0.911646	1	1	1.17466	0.4	0.557775
P59281	Arhgap39	RHG39	597	single	R.AFS#EDEALAQQDSK.H	292.236	315.108	326.952	379.067	350.748	284.745	258.805	325.845	275.904	1.11311	0.7	0.902214	0.875588	0.4	0.557775
B2RQE8	Arhgap42	RHG42	759	single	R.LDTASSNGY#QRPGSVVAAK.A	419.697	417.021	438.532	532.863	373.048	352.676	245.493	310.666	331.317	0.888851	0.7	0.902214	0.740216	0.1	0.218592
B2RQE8	Arhgap42	RHG42	649	single	K.SQGLWTTS#PESSSR.E	81.2393	88.8327	97.0662	87.2046	81.3317	67.6858	97.8558	95.2987	85.0788	0.915561	0.4	0.742218	1.07279	0.7	0.80192
E9PYT0	Arhgap5	E9PYT0	1172	single	R.T#HS#DASDDEAFTTSK.T	41.8772	79.0975	60.4437	83.0424	71.6732	49.8376	141.549	110.881	119.907	1.18578	0.7	0.902214	1.98378	0.1	0.218592
E9PYT0	Arhgap5	E9PYT0	1196	single	R.HRGS#EEDPLLSPVETWK.G	106.599	192.518	218.459	177.376	216.815	158.239	276.517	405.893	329.07	0.921344	1	1	1.70929	0.1	0.218592
E9PYT0	Arhgap5	E9PYT0	1174	single	R.THS#DASDDEAFTTSK.T	957.204	792.778	1394.95	1400.73	1555.1	1356.45	1547.88	2546.61	1585.17	1.46335	0.2	0.571462	1.65604	0.1	0.218592
E9PYT0	Arhgap5	E9PYT0	1177	single	R.THSDAS#DDEAFTTSK.T	428.785	716.808	580.653	665.939	450.225	560.938	378.977	329.478	396.204	0.966046	1	1	0.652673	0.1	0.218592
E9PYT0	Arhgap5	E9PYT0	590	single	R.LYHDS#TNIDK.V	161.058	219.972	194.028	456.165	513.896	584.524	417.325	1611	511.055	2.64856	0.1	0.449082	2.63393	0.1	0.218592
E9PYT0	Arhgap5	E9PYT0	1219	single	K.GGIDNPAITS#DQEVDDK.K	1504.06	2107.27	2686.58	2139.11	2537.47	2087.15	2034.03	3512.98	2492.24	1.01511	1	1	1.18269	0.7	0.80192
O54834	Arhgap6	RHG06	842	single	R.RPAASS#DPFLSLNSTEDLAEGK.E	737.82	811.676	770.951	748.424	630.048	747.513	303.424	405.27	396.493	0.969598	0.4	0.742218	0.51429	0.1	0.218592
O54834	Arhgap6	RHG06	214	single	R.LRS#VPIQSLSELER.A	173.299	178.577	157.654	148.765	149.394	187.383	69.0847	102.054	77.9329	0.862056	0.7	0.902214	0.449701	0.1	0.218592
O54834	Arhgap6	RHG06	790	single	R.CQGS#PTGLDSGTQVIR.R	328.457	340.613	323.141	340.619	224.537	263.064	201.654	149.783	141.618	0.800909	0.7	0.902214	0.45602	0.1	0.218592
O54834	Arhgap6	RHG06	792	single	R.CQGSPT#GLDSGTQVIR.R	118.74	134.064	133.98	127.481	82.6193	98.0055	83.7544	68.628	95.7103	0.731491	0.2	0.571462	0.625124	0.1	0.218592
O54834	Arhgap6	RHG06	669	single	K.ASSGDIS#PYDNNS#PVLSER.S	162.234	186.842	222.056	153.843	127.023	154.21	123.172	160.317	134.684	0.823384	0.1	0.449082	0.720844	0.1	0.218592
O54834	Arhgap6	RHG06	675	single	K.ASSGDIS#PYDNNS#PVLSER.S	207.003	248.637	283.053	216.095	164.015	196.871	188.151	223.61	185.927	0.791802	0.2	0.571462	0.756729	0.2	0.344665
O54834	Arhgap6	RHG06	713	single	K.VPEQYTLVGHLSS#PK.S	155.147	242.551	235.104	276.081	198.428	211.456	165.504	174.683	174.696	0.899414	1	1	0.743003	0.7	0.80192
Q8QZW8	Arhgap9	Q8QZW8	197	single	R.LSGSGPAELAELS#AGEDDELESEPVSK.S	475.067	508.177	460.703	401.98	351.606	344.448	307.736	247.533	392.783	0.740119	0.1	0.449082	0.647774	0.1	0.218592
Q99PT1	Arhgdia	GDIR1	34	single	K.S#IQEIQELDK.D	1293.81	1148.09	1209.7	1524.39	1227.49	1276.3	406.737	598.298	723.161	1.05506	0.4	0.742218	0.494583	0.1	0.218592
Q61210	Arhgef1	ARHG1	905	single	R.LRPLLSQLGGTLS#PNLAAPER.S	50.6279	78.7885	56.531	48.6781	60.9427	64.1061	111.473	141.308	130.769	1.07804	1	1	2.31323	0.1	0.218592
Q61210-5	Arhgef1	ARHG1	412	single	R.SRS#DVDM*DPGSATAVLGPTR.R	244.525	449.413	332.273	435.132	340.19	414.074	182.314	186.165	256.443	1.24618	0.7	0.902214	0.560276	0.2	0.344665
Q61210-5	Arhgef1	ARHG1	432	single	R.RAT#PEPGDDGEPGR.S	577.759	66.6486	134.131	538.424	185.65	436.993	229.962	133.198	106.294	3.25796	0.7	0.902214	0.993047	1	1
Q8C033	Arhgef10	ARHGA	34	single	K.CDTSNNEEEGELFDFDS#GDEVPEADR.Q	35.7498	23.766	26.6444	20.6014	26.1865	29.2089	14.305	13.9276	13.9331	0.982814	0.7	0.902214	0.522927	0.1	0.218592
Q68FM7	Arhgef11	Q68FM7	1321	single	R.NS#GIWDSPELDRNPAEEASSSEPAGSYK.V	245.396	280.643	284.789	309.022	312.965	303.753	205.636	248.794	249.073	1.10112	0.1	0.449082	0.886515	0.4	0.557775
Q68FM7	Arhgef11	Q68FM7	295	single	R.NSVLSDPGLDS#PQTS#PVILAR.V	171.839	173.577	206.219	154.42	122.489	124.651	189.577	180.669	199.799	0.718133	0.1	0.449082	1.09218	0.7	0.80192
Q68FM7	Arhgef11	Q68FM7	1492	single	R.ELLNSLGGESSGGTT#PVGSFHTEAAR.W	77.5959	131.439	99.6594	140.886	119.181	152.61	156.915	180.754	156.7	1.41367	0.2	0.571462	1.57451	0.1	0.218592
Q68FM7	Arhgef11	Q68FM7	1542	single	K.EALTSDPQNNQEQGSYPEEGSDTPLEDS#ATDTASSPGP.-	16.3417	21.5201	25.1707	24.516	20.5052	21.5419	16.0971	11.7988	14.6663	1.00101	1	1	0.681515	0.1	0.218592
Q68FM7	Arhgef11	Q68FM7	1487	single	R.ELLNSLGGES#SGGT#TPVGSFHTEAAR.W	127.935	247.737	241.769	299.806	166.144	203.135	329.263	403.398	313.672	0.840203	1	1	1.36189	0.1	0.218592
Q68FM7	Arhgef11	Q68FM7	619	single	R.LS#TGSFPEDLLESDSSR.S	124.965	189.994	214.27	252.514	170.038	188.519	235.176	332.057	275.482	0.992235	1	1	1.44995	0.1	0.218592
Q68FM7	Arhgef11	Q68FM7	1125	single	K.HPGDAPVLNHPS#PPGSQEPAYQGSTSSR.V	83.7892	129.512	156.103	129.153	109.616	125.488	165.953	165.142	151.846	0.968928	0.7	0.902214	1.27511	0.2	0.344665
Q68FM7	Arhgef11	Q68FM7	37	single	R.QPSDT#SETTGLVQR.C	97.1549	105.911	114.438	144.136	146.451	143.909	126.565	204.435	125.767	1.36091	0.1	0.449082	1.19501	0.1	0.218592
Q68FM7	Arhgef11	Q68FM7	622	single	R.NIIQHFENSHQYDVPEPGT#QRLSTGS#FPEDLLESDSSR.S	42.939	66.1188	65.5047	58.6604	48.9521	50.2352	57.7802	80.5676	77.8284	0.766895	0.7	0.902214	1.18814	0.4	0.557775
Q68FM7	Arhgef11	Q68FM7	685	single	R.LHQSASSS#ASSLSTR.S	30.3612	34.6293	46.6345	60.9112	45.2458	49.6927	56.7627	39.6155	45.0851	1.43499	0.2	0.571462	1.30193	0.4	0.557775
Q68FM7	Arhgef11	Q68FM7	291	single	R.NSVLSDPGLDS#PQTSPVILAR.V	108.737	127.897	125.762	136.281	121.633	153.222	121.099	207.728	145.314	1.08365	0.4	0.742218	1.15546	0.4	0.557775
Q68FM7	Arhgef11	Q68FM7	1326	single	R.NSGIWDS#PELDRNPAEEASSSEPAGSYK.V	35.335	43.4607	55.9535	43.7569	30.4433	30.8918	38.379	33.9321	44.9948	0.710798	0.4	0.742218	0.883072	0.7	0.80192
Q68FM7	Arhgef11	Q68FM7	253	single	R.TCEGRLS#VDSQEADSGLDSGTER.F	173.223	200.784	247.852	226.544	215.096	195.628	252.139	226.962	188.407	1.07128	1	1	1.13038	0.7	0.80192
Q68FM7	Arhgef11	Q68FM7	665	single	R.SRS#DVDMDAAAEATR.L	570.064	683.953	803.132	827.266	634.442	687.954	667.201	708.521	776.615	1.00585	0.7	0.902214	1.03592	1	1
Q8R4H2	Arhgef12	ARHGC	309	single	R.TDWSSGDASRPSSDSADS#PK.S	398.305	375.735	444.132	379.841	344.275	349.744	265.759	246.222	216.064	0.878082	0.2	0.571462	0.618174	0.1	0.218592
Q8R4H2	Arhgef12	ARHGC	41	single	R.SSS#HDFDPTDSSSK.K	231.394	486.618	411.283	744.029	362.886	460.747	369.108	317.109	313.113	1.12027	0.7	0.902214	0.771023	0.7	0.80192
Q8R4H2	Arhgef12	ARHGC	341	single	R.SEGVQDAEPQSLVGS#PSTR.G	305.429	338.931	386.733	310.647	360.244	335.555	352.613	355.388	398.334	0.990039	1	1	1.04855	0.4	0.557775
Q8R4H2	Arhgef12	ARHGC	637	single	K.HLSTPSSVS#PEPQDPAK.L	81.6129	159.801	160.431	97.4866	124.598	161.603	123.175	28.1942	127.115	0.779704	1	1	0.770803	0.4	0.557775
Q8R4H2	Arhgef12	ARHGC	1327	single	K.TGTGDIATCDS#PR.T	833.558	926.821	990.554	1103.29	779.168	734.609	956.158	661.498	697.047	0.840689	0.7	0.902214	0.752084	0.4	0.557775
F8VQN6	Arhgef12	F8VQN6	342	single	R.SEGVQDAQEPQSLVGS#PSTR.G	47.2028	67.0483	64.0236	52.0356	57.2892	65.4542	49.7942	40.2602	41.5181	0.894814	1	1	0.648481	0.2	0.344665
Q3U5C8	Arhgef16	ARHGG	580	single	R.S#SSVPYPFQVNLLHNSEGR.Q	148.899	229.047	146.528	437.314	312.367	450.22	65.0359	142.86	98.5325	2.93699	0.1	0.449082	0.661743	0.1	0.218592
Q3U5C8	Arhgef16	ARHGG	234	single	R.GLNTSHES#DDDILDEPSGPVGTQR.A	372.586	577.258	725.922	628.945	596.544	601.42	1002.24	654.748	987.234	1.04186	0.7	0.902214	1.71021	0.2	0.344665
Q3U5C8	Arhgef16	ARHGG	63	single	R.ANAAFEPDASEPLPPPPS#PEDEEPPRPIVLSTQSPAALK.M	188.125	205.401	240.773	370.052	291.717	308.223	332.586	257.48	466.403	1.50059	0.1	0.449082	1.6192	0.1	0.218592
Q3U5C8	Arhgef16	ARHGG	212	single	K.GS#FKDDPQLYQEIR.E	205.945	206.074	246.292	287.988	314.102	446.45	168.844	348.736	242.593	1.52422	0.1	0.449082	1.17721	1	1
Q80U35	Arhgef17	ARHGH	994	single	R.GHPALQAPS#LEDVTK.R	108.82	89.6119	78.4956	96.3577	150.663	131.995	15.1538	17.9454	16.6715	1.47296	0.2	0.571462	0.186041	0.1	0.218592
Q80U35	Arhgef17	ARHGH	695	single	R.ALVSPETPPT#PGALR.R	120.403	138.011	94.9779	123.211	118.396	119.881	71.5485	63.1475	91.19	0.995667	1	1	0.594242	0.1	0.218592
Q80U35	Arhgef17	ARHGH	305	single	R.SQLVHGCS#QDS#DELNPGGLGSAGGVGSPEPPTSPR.T	54.272	115.154	98.3207	109.256	75.7833	66.1372	35.0816	18.6436	29.1641	0.770776	1	1	0.296622	0.1	0.218592
Q80U35	Arhgef17	ARHGH	142	single	R.RPS#MDSEALGSTSPDR.V	1182.44	1190.23	1445.85	1146.82	887.34	908.426	816.42	1022.5	1002.92	0.763238	0.1	0.449082	0.842633	0.1	0.218592
Q80U35	Arhgef17	ARHGH	516	single	R.DSPSAGSPMEQSESTLSQS#PTSPTTRPTLK.D	126.344	117.975	158.029	122.613	90.864	104.822	97.7886	103.43	104.248	0.829654	0.2	0.571462	0.818632	0.1	0.218592
Q80U35	Arhgef17	ARHGH	611	single	R.MGAQQDDGNDVCPTS#PDWAGDMTQGHR.S	31.5217	48.7231	38.5349	37.6512	21.6313	21.8037	19.421	30.2959	27.9545	0.565817	0.2	0.571462	0.725433	0.1	0.218592
Q80U35	Arhgef17	ARHGH	519	single	R.DSPSAGSPMEQSESTLSQS#PTS#PTTRPTLK.D	22.8527	19.2528	28.7951	23.3862	17.3558	21.1059	19.7514	27.4701	26.9895	0.923562	0.7	0.902214	1.18102	1	1
Q6P9R4	Arhgef18	ARHGI	963	single	R.SLSPVLPAAHGS#APASDPCFPAPSPAPAATPPEAFK.F	41.4149	66.3038	42.9219	114.701	62.1997	99.7448	44.7465	16.3212	23.3135	2.32387	0.2	0.571462	0.54316	0.4	0.557775
Q6P9R4	Arhgef18	ARHGI	577	single	R.RAETFGGYDSVGS#PSK.G	316.5	418.24	532.867	431.758	376.227	431.978	466.814	506.382	478.807	1.03232	1	1	1.14481	0.7	0.80192
Q60875	Arhgef2	ARHG2	940	single	R.LQDSS#DPDTGSEEEVSSR.L	115.769	106.841	120.251	74.9921	74.4036	56.6925	88.3746	69.5624	68.2432	0.642693	0.1	0.449082	0.600875	0.1	0.218592
Q60875	Arhgef2	ARHG2	955	single	R.LQDSSDPDTGSEEEVSSRLS#PPHSPR.D	220.867	297.465	278.377	198.472	173.138	140.274	179.331	123.23	155.442	0.621955	0.1	0.449082	0.558386	0.1	0.218592
Q60875	Arhgef2	ARHG2	931	single	R.EAQELGS#PEDR.L	423.947	424.319	555.171	485.96	397.564	325.668	512.315	572.989	544.076	0.936945	0.4	0.742218	1.28223	0.4	0.557775
Q60875	Arhgef2	ARHG2	885	single	R.S#LPAGDALYLSFNPPQPSR.G	28.1651	38.0565	22.4305	46.0399	24.5528	29.8846	19.8098	27.5783	20.6711	1.06105	0.7	0.902214	0.733927	0.2	0.344665
D3YYY8	Arhgef26	D3YYY8	22	single	R.RRS#TPPLQLLSR.S	61.1344	75.6074	85.3819	73.0232	60.5822	57.8997	24.5278	36.2222	39.9838	0.801274	0.2	0.571462	0.479082	0.1	0.218592
D3YYY8	Arhgef26	D3YYY8	112	single	K.S#PLVSYAASGGS#PK.S	2383.66	1789.27	2418.61	1936.75	1692.12	1544.1	981.253	1286.37	1282.77	0.709885	0.2	0.571462	0.538152	0.1	0.218592
D3YYY8	Arhgef26	D3YYY8	331	single	R.AVVSGFDFDSPTSS#K.K	65.126	72.6633	85.0784	98.3702	85.8996	77.7813	44.9816	70.2115	40.0125	1.18216	0.2	0.571462	0.619042	0.2	0.344665
D3YYY8	Arhgef26	D3YYY8	390	single	K.ALDIDS#DEEPEAK.E	1359.44	1307.6	2228.32	930.118	989.085	1016.14	924.006	1541.63	998.482	0.727567	0.1	0.449082	0.73448	0.4	0.557775
P97433	Arhgef28	ARG28	478	single	K.RSSS#LDALVADSEGEGGSEPPICYAVGSQSSPR.T	28.4536	31.6012	34.225	42.6957	31.7824	35.3777	18.2655	17.9589	18.1977	1.1195	0.2	0.571462	0.575856	0.1	0.218592
P97433	Arhgef28	ARG28	314	single	R.NLESGRS#PS#EEEEDAK.S	1471.81	1422.96	1992.91	1337.96	1273.6	1360.35	1195.82	1169.71	1336.31	0.909058	0.1	0.449082	0.812488	0.1	0.218592
P97433	Arhgef28	ARG28	772	single	R.AVTS#LESEGDSWR.S	130.893	174.897	172.546	245.651	216.939	164.497	152.011	195.34	152.77	1.25728	0.4	0.742218	0.885392	1	1
P97433	Arhgef28	ARG28	1657	single	K.NVADLDSFQSESSS#PQDSNQR.W	67.506	87.2454	94.9938	70.5339	68.8045	76.5222	52.7195	79.2664	63.8646	0.808454	0.7	0.902214	0.732011	0.2	0.344665
P97433	Arhgef28	ARG28	1535	single	R.QRS#LPAVFSPGSK.E	584.741	765.705	854.996	969.488	818.435	892.906	688.736	1091.01	807.176	1.16612	0.2	0.571462	1.05416	0.7	0.80192
P97433	Arhgef28	ARG28	512	single	R.TGLPS#GDELDSFETNTEPDCNISR.T	18.4747	29.0612	34.7298	27.1324	25.1478	13.8364	27.7728	23.7941	27.1858	0.865339	0.4	0.742218	0.935466	0.7	0.80192
P97433	Arhgef28	ARG28	1198	single	R.IQQAVESCPEEEGGRTSES#DEER.R	336.115	507.079	679.492	454.546	411.595	435.311	608.197	516.559	403.991	0.858467	0.7	0.902214	1.01869	1	1
Q80VK6	Arhgef38	ARH38	34	single	R.RKT#DTVVDSSVSGDHSGSLR.R	125.83	297.029	175.681	376.775	289.8	325.95	149.749	191.189	122.831	1.85535	0.2	0.571462	0.852393	0.7	0.80192
Q80VK6	Arhgef38	ARH38	79	single	K.M*TPQAECSSAET#PTPEDEQQVGR.M	93.7626	101.045	107.259	90.3324	101.403	86.4629	92.3099	64.6045	92.5713	0.893983	0.4	0.742218	0.913553	0.1	0.218592
Q3UPH7	Arhgef40	ARH40	1485	single	R.NSPS#LQPPS#PGSSTPALTSGGILGLSR.Q	283.53	334.821	345.876	309.03	343.927	297.448	544.205	450.859	590.087	0.92297	1	1	1.62536	0.1	0.218592
Q3UPH7	Arhgef40	ARH40	959	single	R.IQQQLGEEAS#PR.S	1317.48	1549.62	1799.98	1767.78	1573.99	1322.88	2197.14	3304.32	2980.02	1.01573	1	1	1.92306	0.1	0.218592
Q3UPH7	Arhgef40	ARH40	415	single	R.QQEVLVSLPS#PSEQEPAECSLVK.E	46.4839	63.6154	57.1223	87.9021	64.4514	63.8506	110.04	94.5861	115.875	1.12831	0.1	0.449082	1.92639	0.1	0.218592
Q3UPH7	Arhgef40	ARH40	255	single	R.GS#PVDAEASGLSR.T	163.481	145.92	167.371	154.513	136.12	125.287	160.184	117.239	185.453	0.832635	0.2	0.571462	0.979835	1	1
E9Q7D5	Arhgef5	E9Q7D5	760	single	K.GS#FSLVPDSTVAR.Q	522.073	491.665	343.618	762.86	658.899	782.156	269.72	513.597	317.181	1.55159	0.1	0.449082	0.645116	0.4	0.557775
E9Q7D5	Arhgef5	E9Q7D5	782	single	R.QHRPLPSTPES#PNHTQTSIPSR.L	233.425	619.436	549.636	873.976	409.02	578.079	913.624	1177.18	1155.91	1.05175	0.7	0.902214	2.10305	0.1	0.218592
E9Q7D5	Arhgef5	E9Q7D5	319	single	R.VWVLRDS#EEEGQDQESR.E	301.74	349.555	343.04	430.562	357.116	262.114	421.568	500.751	488.084	1.04103	0.7	0.902214	1.42282	0.1	0.218592
E9Q7D5	Arhgef5	E9Q7D5	957	single	R.S#APQEEFNNTR.R	255.564	280.598	316.93	348.938	293.264	341.535	331.766	371.183	393.514	1.21717	0.2	0.571462	1.32283	0.1	0.218592
E9Q7D5	Arhgef5	E9Q7D5	173	single	K.EKEEEETSPDTS#IPR.G	395.272	322.102	423.199	397.785	393.314	397.029	411.248	526.275	467.902	1.00445	1	1	1.18375	0.2	0.344665
E9Q7D5	Arhgef5	E9Q7D5	577	single	R.YPCATSDTANPHS#PLSSYTGVTQHLR.S	35.4997	39.3118	50.725	43.9657	38.7627	37.7135	49.1073	53.7597	47.2435	0.986031	1	1	1.24917	0.4	0.557775
E9Q7D5	Arhgef5	E9Q7D5	1110	single	R.LDSLAEPHGLSS#PR.H	149.365	412.98	369.794	490.918	333.468	347.508	470.084	483.587	459.647	0.939736	1	1	1.27121	0.1	0.218592
[truncated: 13,629 more rows]

## Sheet: Table S4
Table S4: Scaled phosphopeptide quantification from colons expressing WT or mutant K-Ras.
[truncated: 11,552 more rows]

## Sheet: Table S5
Table S5: Total protein quantification from pancreases expressing WT or mutant K-Ras.
[truncated: 6,090 more rows]

[truncated: 5 more sheets: Table S6, Table S7, Table S8, Table S9, Table S10]
